# Supplementary material for: Distribution Patterns of DNA N6-Methyladenosine Modification in Non-coding RNA Genes
Source: Front Genet. 2020 Mar 24;11:268. doi: 10.3389/fgene.2020.00268 (PMC7105833; doi:10.3389/fgene.2020.00268)
Supplement: Supplementary file 3 [file Data_Sheet_2.xlsx]

## Sheet: Sheet1
Data Sheet S2: Percentage of 6mA-methylated non-coding RNA genes and protein-coding genes in four species.
A. thaliana	tRNA	miRNA	snRNA	rRNA	lncRNA	protein-coding
total	684	325	82	14	3480	27569
6mA	18	34	8	7	627	13981
non-6mA	666	291	74	7	2853	13588
Ratio	0.0263158	0.104615	0.097561	0.5	0.180172	0.507128
C. elegans	tRNA	miRNA	snRNA	rRNA	lncRNA	protein-coding
total	634	260	127	22	176	20186
6mA	3	5	0	2	29	5489
non-6mA	631	255	127	20	147	14697
Ratio	0.00473186	0.0192308	0	0.0909091	0.164773	0.271921
D. melanogaster	tRNA	miRNA	snRNA	rRNA	lncRNA	protein-coding
total	312	257	32	100	1924	13930
6mA	6	3	2	2	217	3804
non-6mA	306	254	30	98	1707	10126
Ratio	0.0192308	0.0116732	0.0625	0.02	0.112786	0.27308
H. spains	tRNA	miRNA	snRNA	rRNA	lncRNA	protein-coding
total	436	2210	63	31	14638	20062
6mA	12	77	9	10	12482	17796
non-6mA	424	2133	54	21	2156	2266
Ratio	0.0275229	0.0348416	0.142857	0.322581	0.852712	0.88705
