# Supplementary material for: Distribution Patterns of DNA N6-Methyladenosine Modification in Non-coding RNA Genes
Source: Front Genet. 2020 Mar 24;11:268. doi: 10.3389/fgene.2020.00268 (PMC7105833; doi:10.3389/fgene.2020.00268)
Supplement: Supplementary file 6 [file Data_Sheet_5.xlsx]

## Sheet: Sheet1
Data Sheet S5: Gene ontology function and enriched category.
ID	Description	GeneRatio	BgRatio	pvalue	p.adjust	qvalue	geneID	Count
GO:1901342	regulation of vasculature development	94/468	425/17913	1.27934e-60	6.59502e-57	2.72164e-57	MIR205/TWIST1/KRT1/KLF2/STAT3/MIR125A/MIR199A1/VEGFA/TERT/C5/MIR21/MIR24-1/MIR193A/RUNX1/PDCD4/MIR410/MIR181B1/MIR130A/MIR143/MIR17/MIR20A/MIR424/MIR145/KIT/MIR210/CTNNB1/MIR497/MIR34A/MIR222/MIR23A/IL10/MIR137/MIR221/MIR196A1/FGF1/MIR200B/MIR939/HOXA5/ERBB2/HIF1A/ANGPT2/SIRT1/MIR217/DNMT1/MIR126/MIR15B/MIR23B/MIR106B/MIR125B1/MIR19A/PTGS2/HMGA2/MIR29B1/SP1/MIR150/MIR19B1/NOTCH1/IL6/MIR31/CXCR4/P…	94
GO:0045765	regulation of angiogenesis	84/468	383/17913	1.1187e-53	2.88346e-50	1.18995e-50	TWIST1/KRT1/KLF2/STAT3/MIR125A/MIR199A1/VEGFA/TERT/C5/MIR21/MIR24-1/MIR193A/RUNX1/MIR410/MIR181B1/MIR130A/MIR143/MIR17/MIR20A/MIR424/MIR145/MIR210/CTNNB1/MIR497/MIR34A/MIR222/MIR23A/IL10/MIR137/MIR221/MIR196A1/FGF1/MIR200B/MIR939/HOXA5/ERBB2/HIF1A/ANGPT2/SIRT1/MIR217/MIR126/MIR15B/MIR23B/MIR106B/MIR125B1/MIR19A/PTGS2/HMGA2/SP1/MIR150/MIR19B1/NOTCH1/IL6/MIR31/CXCR4/PDPK1/MIR375/BMPER/SFRP1/MIR206/…	84
GO:0050673	epithelial cell proliferation	85/468	425/17913	7.14574e-51	1.22788e-47	5.06721e-48	TWIST1/AKT1/BAX/PTEN/CCND1/MYC/SNAI2/SOX2/STAT3/CDKN1B/CDKN2B/TGFB1/VEGFA/MAPK1/MIR21/MIR24-1/MIR193A/FGFR1/MIR410/MIR152/MIR130A/MIR424/KIT/CTNNB1/SMAD3/CDK6/NUPR1/MIR497/MIR34A/MIR222/MIR23A/IL10/MIR135B/FGF1/YAP1/CDKN1C/HOXA5/ERBB2/HIF1A/AR/SIRT1/RB1/CAV1/MIR126/MIR15B/MIR23B/RUNX3/EGFR/PIK3CB/MIR29B1/SP1/MEF2C/EPPK1/PDPK1/BMPER/ROBO1/MAP2K1/SFRP1/MMP14/HMGB1/MIR129-1/CCL2/BMP4/KDR/MIR29A/MIR1…	85
GO:0050678	regulation of epithelial cell proliferation	79/468	369/17913	1.43007e-49	1.843e-46	7.60571e-47	TWIST1/AKT1/BAX/PTEN/CCND1/MYC/SNAI2/SOX2/STAT3/CDKN1B/CDKN2B/TGFB1/VEGFA/MIR21/MIR24-1/MIR193A/FGFR1/MIR410/MIR152/MIR130A/MIR424/CTNNB1/SMAD3/CDK6/NUPR1/MIR497/MIR34A/MIR222/MIR23A/IL10/MIR135B/FGF1/YAP1/CDKN1C/HOXA5/ERBB2/HIF1A/AR/SIRT1/RB1/CAV1/MIR126/MIR15B/MIR23B/RUNX3/EGFR/MIR29B1/SP1/MEF2C/EPPK1/PDPK1/ROBO1/SFRP1/HMGB1/MIR129-1/CCL2/BMP4/KDR/MIR29A/MIR155/MIR29C/MIR503/MTOR/PTCH1/MIR146A/…	79
GO:0090130	tissue migration	78/468	363/17913	4.64836e-49	4.79246e-46	1.97775e-46	AKT1/PTEN/MMP9/ADIPOR1/MIR199A1/TGFB1/VEGFA/MIR204/MIR21/MIR24-1/MIR193A/FGFR1/MIR410/MIR152/MIR143/MIR20A/MIR424/KIT/MIR210/FOXF1/MIR497/MIR222/MIR23A/MIR135B/MIR137/MIR221/MIR196A1/FGF1/MIR200A/MIR200B/MIR939/HIF1A/ANGPT2/SIRT1/MIR126/MIR15B/MIR23B/PTGS2/SP1/MIR150/MEF2C/MIR19B1/ZEB2/NOTCH1/MIR31/EPPK1/PDPK1/BMPER/PRKCE/ROBO1/STC1/MIR206/PTK2/PXN/HMGB1/MIR129-1/MIR320A/BMP4/KDR/NFE2L2/MIR29A/MI…	78
GO:0010631	epithelial cell migration	77/468	354/17913	7.74845e-49	6.65721e-46	2.7473e-46	AKT1/PTEN/MMP9/ADIPOR1/MIR199A1/TGFB1/VEGFA/MIR204/MIR21/MIR24-1/MIR193A/FGFR1/MIR410/MIR152/MIR143/MIR20A/MIR424/KIT/MIR210/MIR497/MIR222/MIR23A/MIR135B/MIR137/MIR221/MIR196A1/FGF1/MIR200A/MIR200B/MIR939/HIF1A/ANGPT2/SIRT1/MIR126/MIR15B/MIR23B/PTGS2/SP1/MIR150/MEF2C/MIR19B1/ZEB2/NOTCH1/MIR31/EPPK1/PDPK1/BMPER/PRKCE/ROBO1/STC1/MIR206/PTK2/PXN/HMGB1/MIR129-1/MIR320A/BMP4/KDR/NFE2L2/MIR29A/MIR155/M…	77
GO:0090132	epithelium migration	77/468	357/17913	1.50602e-48	1.10908e-45	4.57695e-46	AKT1/PTEN/MMP9/ADIPOR1/MIR199A1/TGFB1/VEGFA/MIR204/MIR21/MIR24-1/MIR193A/FGFR1/MIR410/MIR152/MIR143/MIR20A/MIR424/KIT/MIR210/MIR497/MIR222/MIR23A/MIR135B/MIR137/MIR221/MIR196A1/FGF1/MIR200A/MIR200B/MIR939/HIF1A/ANGPT2/SIRT1/MIR126/MIR15B/MIR23B/PTGS2/SP1/MIR150/MEF2C/MIR19B1/ZEB2/NOTCH1/MIR31/EPPK1/PDPK1/BMPER/PRKCE/ROBO1/STC1/MIR206/PTK2/PXN/HMGB1/MIR129-1/MIR320A/BMP4/KDR/NFE2L2/MIR29A/MIR155/M…	77
GO:0010632	regulation of epithelial cell migration	71/468	294/17913	2.5001e-48	1.611e-45	6.64828e-46	AKT1/PTEN/MMP9/ADIPOR1/MIR199A1/TGFB1/VEGFA/MIR204/MIR21/MIR24-1/MIR193A/FGFR1/MIR410/MIR152/MIR143/MIR20A/MIR424/MIR210/MIR497/MIR222/MIR23A/MIR135B/MIR137/MIR221/MIR196A1/FGF1/MIR200A/MIR200B/MIR939/HIF1A/ANGPT2/SIRT1/MIR126/MIR15B/MIR23B/PTGS2/SP1/MIR150/MEF2C/MIR19B1/NOTCH1/MIR31/EPPK1/PDPK1/BMPER/PRKCE/STC1/MIR206/PTK2/HMGB1/MIR129-1/MIR320A/BMP4/KDR/NFE2L2/MIR29A/MIR155/MIR29C/MIR503/MTOR/M…	71
GO:0001667	ameboidal-type cell migration	83/468	446/17913	4.62268e-47	2.64777e-44	1.09268e-44	TWIST1/AKT1/PTEN/MMP9/ADIPOR1/MIR199A1/TGFB1/VEGFA/MIR204/MIR21/MIR24-1/MIR193A/FGFR1/MIR410/MIR152/MIR143/MIR20A/MIR424/MIR145/KIT/MIR210/MIR497/MIR222/MIR23A/MIR135B/MIR137/MIR221/MIR196A1/FGF1/FN1/MIR200A/MIR200B/MIR939/HIF1A/ANGPT2/SIRT1/MIR126/MIR15B/MIR23B/SDC4/PTGS2/SP1/MIR150/MEF2C/MIR19B1/ZEB2/NOTCH1/MIR31/EPPK1/PDPK1/BMPER/PRKCE/ROBO1/STC1/MIR206/MIR124-1/PTK2/PXN/HMGB1/MIR129-1/MIR320A…	83
GO:0043542	endothelial cell migration	66/468	275/17913	1.01725e-44	5.24391e-42	2.16406e-42	AKT1/PTEN/MIR199A1/TGFB1/VEGFA/MIR204/MIR21/MIR24-1/MIR193A/FGFR1/MIR410/MIR152/MIR143/MIR20A/MIR424/MIR210/MIR497/MIR23A/MIR135B/MIR137/MIR221/MIR196A1/FGF1/MIR200A/MIR200B/MIR939/HIF1A/ANGPT2/SIRT1/MIR126/MIR15B/MIR23B/PTGS2/SP1/MIR150/MEF2C/MIR19B1/NOTCH1/MIR31/PDPK1/BMPER/ROBO1/STC1/MIR206/PTK2/PXN/HMGB1/MIR129-1/MIR320A/BMP4/KDR/NFE2L2/MIR29A/MIR155/MIR29C/MIR503/MIR146A/AMOT/FBXW7/AKT3/PDGF…	66
GO:0010594	regulation of endothelial cell migration	61/468	231/17913	5.18543e-44	2.43008e-41	1.00285e-41	AKT1/MIR199A1/TGFB1/VEGFA/MIR204/MIR21/MIR24-1/MIR193A/FGFR1/MIR410/MIR152/MIR143/MIR20A/MIR424/MIR210/MIR497/MIR23A/MIR135B/MIR137/MIR221/MIR196A1/FGF1/MIR200A/MIR200B/MIR939/HIF1A/ANGPT2/SIRT1/MIR126/MIR15B/MIR23B/PTGS2/SP1/MIR150/MEF2C/MIR19B1/NOTCH1/MIR31/PDPK1/BMPER/STC1/MIR206/PTK2/HMGB1/MIR129-1/MIR320A/BMP4/KDR/NFE2L2/MIR29A/MIR155/MIR29C/MIR503/MIR146A/FBXW7/AKT3/PDGFB/WNT5A/MIR27B/MIR49…	61
GO:0043534	blood vessel endothelial cell migration	55/468	182/17913	3.21681e-43	1.38189e-40	5.70278e-41	AKT1/TGFB1/VEGFA/MIR204/MIR24-1/MIR193A/FGFR1/MIR410/MIR152/MIR143/MIR20A/MIR424/MIR210/MIR497/MIR23A/MIR135B/MIR137/MIR221/MIR196A1/MIR200A/MIR200B/MIR939/HIF1A/ANGPT2/SIRT1/MIR126/MIR15B/MIR23B/PTGS2/SP1/MIR150/MEF2C/MIR19B1/NOTCH1/MIR31/PDPK1/ROBO1/MIR206/HMGB1/MIR129-1/MIR320A/KDR/NFE2L2/MIR155/MIR29C/MIR503/MIR146A/AMOT/FBXW7/AKT3/PDGFB/MIR27B/MIR495/MIR132/ITGB1	55
GO:0043535	regulation of blood vessel endothelial cell migration	52/468	158/17913	4.75452e-43	1.88535e-40	7.78048e-41	AKT1/TGFB1/VEGFA/MIR204/MIR24-1/MIR193A/FGFR1/MIR410/MIR152/MIR143/MIR20A/MIR424/MIR210/MIR497/MIR23A/MIR135B/MIR137/MIR221/MIR196A1/MIR200A/MIR200B/MIR939/HIF1A/ANGPT2/SIRT1/MIR126/MIR15B/MIR23B/PTGS2/SP1/MIR150/MEF2C/MIR19B1/NOTCH1/MIR31/PDPK1/MIR206/HMGB1/MIR129-1/MIR320A/KDR/NFE2L2/MIR155/MIR29C/MIR503/MIR146A/FBXW7/AKT3/PDGFB/MIR27B/MIR495/MIR132	52
GO:0033002	muscle cell proliferation	60/468	243/17913	1.96391e-41	7.23141e-39	2.98426e-39	AKT1/PTEN/MMP2/MMP9/CDKN1A/CDK1/STAT3/CDKN1B/MIR199A1/MAPK1/MIR204/TERT/MIR21/FGFR1/PDCD4/MIR130A/MIR143/MIR17/MIR20A/MIR424/MIR145/CTNNB1/CCNB1/MIR34A/MIR222/IL10/MIR135B/MIR137/MIR221/MIR301A/YAP1/MIR200B/DNMT1/MIR23B/PTGS2/EGFR/MEF2C/MIR19B1/MIR590/NOTCH1/IL6/MIR140/MAPK14/MIR124-1/MDM2/BMP4/MIR214/HDAC4/MIR503/MIR448/MTOR/NOTCH3/MIR182/TNF/IFNG/TGFB2/PDGFB/MIR1-1/MIR27B/MIR96	60
GO:0035278	miRNA mediated inhibition of translation	40/468	97/17913	6.83629e-38	2.07301e-35	8.55489e-36	MIR205/MIR181A1/STAT3/MIRLET7A1/MIR204/MIR21/MIR218-1/MIR181B1/MIR17/MIR20A/MIR145/MIR210/MIR107/MIR222/MIR135B/MIR221/MIR939/MIR148A/MIR15B/MIR106B/MIR125B1/MIR29B1/MIR106A/MIR19B1/MIR590/MIR31/MIR200C/MIR124-1/MIR29A/MIR155/MIR503/MIR365A/MIR138-1/MIR182/RBM4/MIR299/MIR1-1/MIR27B/MIR96/MIR132	40
GO:0040033	negative regulation of translation, ncRNA-mediated	40/468	97/17913	6.83629e-38	2.07301e-35	8.55489e-36	MIR205/MIR181A1/STAT3/MIRLET7A1/MIR204/MIR21/MIR218-1/MIR181B1/MIR17/MIR20A/MIR145/MIR210/MIR107/MIR222/MIR135B/MIR221/MIR939/MIR148A/MIR15B/MIR106B/MIR125B1/MIR29B1/MIR106A/MIR19B1/MIR590/MIR31/MIR200C/MIR124-1/MIR29A/MIR155/MIR503/MIR365A/MIR138-1/MIR182/RBM4/MIR299/MIR1-1/MIR27B/MIR96/MIR132	40
GO:0045974	regulation of translation, ncRNA-mediated	40/468	97/17913	6.83629e-38	2.07301e-35	8.55489e-36	MIR205/MIR181A1/STAT3/MIRLET7A1/MIR204/MIR21/MIR218-1/MIR181B1/MIR17/MIR20A/MIR145/MIR210/MIR107/MIR222/MIR135B/MIR221/MIR939/MIR148A/MIR15B/MIR106B/MIR125B1/MIR29B1/MIR106A/MIR19B1/MIR590/MIR31/MIR200C/MIR124-1/MIR29A/MIR155/MIR503/MIR365A/MIR138-1/MIR182/RBM4/MIR299/MIR1-1/MIR27B/MIR96/MIR132	40
GO:1904018	positive regulation of vasculature development	54/468	232/17913	7.05822e-36	2.02139e-33	8.3419e-34	TWIST1/STAT3/MIR125A/MIR199A1/VEGFA/TERT/C5/MIR21/RUNX1/MIR181B1/MIR130A/MIR143/MIR20A/MIR424/MIR145/KIT/MIR210/MIR34A/MIR23A/IL10/FGF1/HIF1A/ANGPT2/SIRT1/MIR126/MIR23B/MIR125B1/PTGS2/HMGA2/SP1/MIR150/MIR31/CXCR4/PDPK1/BMPER/MIR140/MIR124-1/CDH5/KDR/NFE2L2/MIR29A/MIR155/MIR503/SERPINE1/MIR146A/ANGPTL4/PKM/AKT3/PDGFB/WNT5A/MIR1-1/MIR27B/MIR132/ITGB1	54
GO:1903670	regulation of sprouting angiogenesis	44/468	143/17913	4.44521e-35	1.20605e-32	4.97715e-33	KLF2/MIR125A/VEGFA/MIR24-1/MIR193A/MIR410/MIR17/MIR20A/MIR424/MIR497/MIR34A/MIR222/MIR23A/IL10/MIR221/MIR196A1/FGF1/MIR126/MIR15B/MIR23B/MIR19A/PTGS2/MIR150/MIR19B1/NOTCH1/MIR31/PDPK1/MIR375/BMPER/MIR206/MIR320A/KDR/MIR155/MIR29C/MIR503/MIR146A/MIR138-1/FBXW7/PKM/AKT3/MIR1-1/MIR27B/MIR495/MIR132	44
GO:0002040	sprouting angiogenesis	48/468	181/17913	8.08254e-35	2.08327e-32	8.59727e-33	AKT1/KLF2/MIR125A/VEGFA/MIR24-1/MIR193A/MIR410/MIR17/MIR20A/MIR424/MIR497/MIR34A/MIR222/MIR23A/IL10/MIR221/MIR196A1/FGF1/MIR126/MIR15B/MIR23B/MIR19A/PTGS2/MIR150/MIR19B1/NOTCH1/MIR31/PDPK1/MIR375/BMPER/ROBO1/MIR206/MIR320A/BMP4/KDR/MIR155/MIR29C/MIR503/MIR146A/MIR138-1/FBXW7/PKM/AKT3/MIR1-1/MIR27B/MIR495/MIR132/ITGB1	48
GO:1902806	regulation of cell cycle G1/S phase transition	49/468	195/17913	2.59636e-34	6.37344e-32	2.6302e-32	PAGR1/AKT1/BAX/BCL2/PTEN/CCND1/EZH2/CDKN1A/CDK1/CDK2/CDKN1B/CDKN2B/TERT/SOX4/MIR21/MIR193A/PCNA/CCNE1/CDK6/CDKN2A/CCNB1/E2F1/TP53/MIR222/MIR137/MIR221/RB1/MIR15B/CDKN2C/MIR372/EGFR/MIR29B1/MIR590/CCND2/CCL2/MDM2/MIR214/MIR29A/MIR29C/AURKA/MIR503/CDK4/MIR138-1/FBXW7/CDC25C/CUL4A/EP300/ATM/MIR495	49
GO:1901343	negative regulation of vasculature development	48/468	191/17913	1.25442e-33	2.93934e-31	1.21301e-31	KLF2/MIR125A/MIR21/MIR24-1/MIR193A/PDCD4/MIR410/MIR143/MIR17/MIR20A/MIR424/MIR145/CTNNB1/MIR497/MIR34A/MIR222/MIR137/MIR221/MIR196A1/MIR200B/MIR939/HOXA5/ANGPT2/MIR217/DNMT1/MIR15B/MIR23B/MIR106B/MIR125B1/MIR19A/MIR19B1/NOTCH1/MIR375/MIR206/MIR320A/BMP4/MIR214/MIR29A/MIR155/MIR29C/MIR503/SERPINE1/MIR146A/MIR138-1/AMOT/TGFB2/PDGFB/MIR495	48
GO:0030336	negative regulation of cell migration	60/468	332/17913	3.36955e-33	7.55218e-31	3.11664e-31	AKT1/BCL2/PTEN/CDH1/STAT3/ADIPOR1/SMAD7/TGFB1/MIR204/BST2/C5/MIR21/MIR24-1/MIR193A/MIR218-1/MIR410/MIR152/MIR20A/MIR424/IL33/MIR497/MIR149/MIR34A/MIR137/MIR221/MIR196A1/MIR200B/ANGPT2/MIR15B/HOXA7/MIR29B1/FOXO3/MEF2C/MIR19B1/NOTCH1/EPPK1/ROBO1/STC1/SFRP1/MIR140/MIR206/MIR124-1/HMGB1/MIR129-1/MIR320A/CCL2/MIR214/NFE2L2/MIR29A/MIR155/MIR29C/MIR503/SERPINE1/MIR146A/MIR138-1/WASL/MIR182/BCR/MIR495/MI…	60
GO:0001935	endothelial cell proliferation	47/468	185/17913	3.54762e-33	7.62e-31	3.14463e-31	AKT1/STAT3/VEGFA/MIR21/MIR24-1/MIR193A/FGFR1/MIR410/MIR152/MIR130A/MIR424/MIR497/MIR34A/MIR222/MIR23A/IL10/MIR135B/HIF1A/SIRT1/CAV1/MIR126/MIR15B/MIR23B/PIK3CB/SP1/MEF2C/PDPK1/BMPER/MMP14/HMGB1/MIR129-1/CCL2/BMP4/KDR/MIR29A/MIR155/MIR29C/MIR503/MTOR/MIR146A/TNF/AKT3/PDGFB/WNT5A/MIR27B/MIR495/MIR132	47
GO:2000045	regulation of G1/S transition of mitotic cell cycle	46/468	177/17913	5.74068e-33	1.18373e-30	4.88501e-31	AKT1/BAX/BCL2/PTEN/CCND1/EZH2/CDKN1A/CDK1/CDK2/CDKN1B/CDKN2B/TERT/SOX4/MIR21/MIR193A/PCNA/CCNE1/CDK6/CDKN2A/CCNB1/E2F1/TP53/MIR222/MIR137/MIR221/RB1/MIR15B/CDKN2C/MIR372/EGFR/MIR29B1/MIR590/CCND2/CCL2/MDM2/MIR214/MIR29A/MIR29C/AURKA/CDK4/MIR138-1/CDC25C/CUL4A/EP300/ATM/MIR495	46
GO:0051271	negative regulation of cellular component movement	62/468	365/17913	1.10227e-32	2.18546e-30	9.01896e-31	AKT1/BCL2/PTEN/CDH1/STAT3/CDKN1B/ADIPOR1/SMAD7/TGFB1/MIR204/BST2/C5/MIR21/MIR24-1/MIR193A/MIR218-1/MIR410/MIR152/MIR20A/MIR424/IL33/MIR497/MIR149/MIR34A/MIR137/MIR221/MIR196A1/MIR200B/ANGPT2/MIR15B/HOXA7/MIR29B1/FOXO3/MEF2C/MIR19B1/NOTCH1/EPPK1/ROBO1/STC1/SFRP1/MIR140/MIR206/MIR124-1/HMGB1/MIR129-1/MIR320A/CCL2/MIR214/NFE2L2/MIR29A/MIR155/MIR29C/MIR503/SERPINE1/MIR146A/MIR138-1/WASL/MIR182/BCR/WN…	62
GO:0048660	regulation of smooth muscle cell proliferation	45/468	172/17913	2.08857e-32	3.98761e-30	1.64561e-30	AKT1/PTEN/MMP2/MMP9/CDKN1A/CDKN1B/TERT/MIR21/PDCD4/MIR130A/MIR143/MIR17/MIR20A/MIR424/MIR145/CTNNB1/MIR34A/MIR222/IL10/MIR135B/MIR137/MIR221/MIR301A/DNMT1/PTGS2/EGFR/MEF2C/IL6/MIR140/MIR124-1/MDM2/BMP4/MIR214/HDAC4/MIR503/MIR448/MTOR/NOTCH3/MIR182/TNF/IFNG/PDGFB/MIR1-1/MIR27B/MIR96	45
GO:0048659	smooth muscle cell proliferation	45/468	174/17913	3.63228e-32	6.68728e-30	2.75971e-30	AKT1/PTEN/MMP2/MMP9/CDKN1A/CDKN1B/TERT/MIR21/PDCD4/MIR130A/MIR143/MIR17/MIR20A/MIR424/MIR145/CTNNB1/MIR34A/MIR222/IL10/MIR135B/MIR137/MIR221/MIR301A/DNMT1/PTGS2/EGFR/MEF2C/IL6/MIR140/MIR124-1/MDM2/BMP4/MIR214/HDAC4/MIR503/MIR448/MTOR/NOTCH3/MIR182/TNF/IFNG/PDGFB/MIR1-1/MIR27B/MIR96	45
GO:2000146	negative regulation of cell motility	60/468	347/17913	4.39026e-32	7.80407e-30	3.22059e-30	AKT1/BCL2/PTEN/CDH1/STAT3/ADIPOR1/SMAD7/TGFB1/MIR204/BST2/C5/MIR21/MIR24-1/MIR193A/MIR218-1/MIR410/MIR152/MIR20A/MIR424/IL33/MIR497/MIR149/MIR34A/MIR137/MIR221/MIR196A1/MIR200B/ANGPT2/MIR15B/HOXA7/MIR29B1/FOXO3/MEF2C/MIR19B1/NOTCH1/EPPK1/ROBO1/STC1/SFRP1/MIR140/MIR206/MIR124-1/HMGB1/MIR129-1/MIR320A/CCL2/MIR214/NFE2L2/MIR29A/MIR155/MIR29C/MIR503/SERPINE1/MIR146A/MIR138-1/WASL/MIR182/BCR/MIR495/MI…	60
GO:0044843	cell cycle G1/S phase transition	55/468	288/17913	9.32755e-32	1.60278e-29	6.61438e-30	PAGR1/AKT1/BAX/BCL2/PTEN/CCND1/MYC/EZH2/LATS2/CDKN1A/CDK1/CDK2/CDKN1B/CDKN2B/TERT/SOX4/MIR21/MIR193A/PCNA/CCNE1/CDK6/CDKN2A/CCNB1/E2F1/TP53/EIF4E/MIR222/MIR137/MIR221/RB1/MIR15B/CDKN2C/MIR372/EGFR/MIR29B1/MIR590/CCND2/CCL2/MDM2/MIR214/MIR29A/MIR29C/AURKA/CDT1/MIR503/CDK4/MIR138-1/FBXW7/CDC25C/CUL4A/EP300/ATM/MIR495/TYMS/ITGB1	55
GO:0001936	regulation of endothelial cell proliferation	44/468	170/17913	1.74179e-31	2.89643e-29	1.1953e-29	AKT1/STAT3/VEGFA/MIR21/MIR24-1/MIR193A/FGFR1/MIR410/MIR152/MIR130A/MIR424/MIR497/MIR34A/MIR222/MIR23A/IL10/MIR135B/HIF1A/SIRT1/CAV1/MIR126/MIR15B/MIR23B/SP1/MEF2C/PDPK1/HMGB1/MIR129-1/CCL2/BMP4/KDR/MIR29A/MIR155/MIR29C/MIR503/MTOR/MIR146A/TNF/AKT3/PDGFB/WNT5A/MIR27B/MIR495/MIR132	44
GO:0042692	muscle cell differentiation	60/468	359/17913	3.10302e-31	4.99877e-29	2.06289e-29	AKT1/BCL2/CASP3/ZEB1/EZH2/KDM1A/CDK1/MIR199A1/TGFB1/VEGFA/CDH2/MIR204/BDNF/CDC42/MIR21/MIR24-1/PDCD4/MIR424/MIR145/KIT/CTNNB1/CCNB1/SIK1/FOXF1/MIR34A/YBX1/MIR222/MIR23A/MIR221/ATG5/MIR200B/QKI/RBM38/SIRT1/RB1/DNMT1/MIR15B/MIR23B/MIR125B1/MIR19A/MIR195/MAML1/MEF2C/MIR19B1/MIR590/NOTCH1/MIR140/MIR206/MAPK14/MIR124-1/MMP14/BMP4/HDAC4/MTOR/SMAD4/RBM4/PDGFB/MIR1-1/HES1/ITGB1	60
GO:0050680	negative regulation of epithelial cell proliferation	43/468	163/17913	3.61794e-31	5.65166e-29	2.33233e-29	PTEN/SNAI2/SOX2/CDKN1B/CDKN2B/TGFB1/MIR21/MIR24-1/MIR193A/MIR410/MIR152/MIR424/CDK6/NUPR1/MIR497/MIR34A/MIR222/CDKN1C/AR/RB1/CAV1/MIR126/MIR15B/RUNX3/MIR29B1/MEF2C/EPPK1/ROBO1/SFRP1/MIR129-1/CCL2/BMP4/MIR155/MIR29C/MIR503/PTCH1/MIR146A/FBXW7/TNF/TGFB2/WNT5A/MIR495/MIR132	43
GO:0040013	negative regulation of locomotion	61/468	377/17913	6.19891e-31	9.39865e-29	3.87864e-29	AKT1/BCL2/PTEN/CDH1/STAT3/ADIPOR1/SMAD7/TGFB1/MIR204/BST2/C5/MIR21/MIR24-1/MIR193A/MIR218-1/MIR410/MIR152/MIR20A/MIR424/IL33/MIR497/MIR149/MIR34A/MIR137/MIR221/MIR196A1/MIR200B/ANGPT2/MIR15B/HOXA7/MIR29B1/FOXO3/MEF2C/MIR19B1/NOTCH1/EPPK1/ROBO1/STC1/SFRP1/MIR140/MIR206/MIR124-1/HMGB1/MIR129-1/MIR320A/CCL2/MIR214/NFE2L2/MIR29A/MIR155/MIR29C/MIR503/SERPINE1/MIR146A/MIR138-1/WASL/MIR182/BCR/WNT5A/MIR…	61
GO:0051147	regulation of muscle cell differentiation	45/468	185/17913	6.64493e-31	9.78703e-29	4.03892e-29	BCL2/ZEB1/EZH2/MIR199A1/TGFB1/CDH2/MIR204/BDNF/CDC42/MIR21/PDCD4/MIR424/MIR145/KIT/CTNNB1/SIK1/FOXF1/MIR34A/YBX1/MIR222/MIR221/MIR200B/RBM38/SIRT1/DNMT1/MIR15B/MIR125B1/MIR19A/MAML1/MEF2C/MIR19B1/MIR590/NOTCH1/MIR140/MIR206/MAPK14/MIR124-1/MMP14/BMP4/HDAC4/MTOR/SMAD4/RBM4/PDGFB/MIR1-1	45
GO:0034249	negative regulation of cellular amide metabolic process	48/468	217/17913	7.23702e-31	1.0363e-28	4.27661e-29	MIR205/MIR181A1/STAT3/MIRLET7A1/MIR204/MIR21/MIR218-1/MIR181B1/MIR17/MIR20A/MIR145/MIR210/MIR107/EIF4E/MIR222/MIR135B/MIR221/DHX36/MIR939/MIR148A/MIR15B/MIR106B/MIR125B1/MIR29B1/MIR106A/MIR19B1/MIR590/ILF3/MIR31/PRKAA1/MIR200C/SNCA/MIR124-1/MIR29A/MIR155/MIR503/MIR365A/NCL/MIR138-1/MIR182/RBM4/MIR299/CELF1/MIR1-1/MIR27B/MIR96/MIR132/TYMS	48
GO:0034248	regulation of cellular amide metabolic process	66/468	452/17913	1.05979e-30	1.47655e-28	6.09343e-29	MIR205/MIR181A1/VIM/AKT1/CASP3/STAT3/MIRLET7A1/SLC7A11/MAPK1/MAPK3/MIR204/SOX4/MIR21/MIR218-1/MIR181B1/MIR17/MIR20A/MIR145/MIR210/MIR107/EIF4E/MIR222/MIR135B/MIR221/DHX36/MIR939/QKI/ERBB2/MIR148A/MIR15B/MIR106B/MIR125B1/MKNK2/MIR29B1/MIR106A/FOXO3/MIR19B1/MIR590/ILF3/IL6/MIR31/PRKAA1/MIR200C/MIR206/SNCA/MIR124-1/NFE2L2/MIR29A/MIR155/MIR503/CDK4/MIR365A/MTOR/NCL/MIR138-1/C1QBP/MIR182/TNF/RBM4/MIR2…	66
GO:0016525	negative regulation of angiogenesis	44/468	177/17913	1.13668e-30	1.542e-28	6.36352e-29	KLF2/MIR125A/MIR21/MIR24-1/MIR193A/MIR410/MIR143/MIR17/MIR20A/MIR424/MIR145/CTNNB1/MIR497/MIR34A/MIR222/MIR137/MIR221/MIR196A1/MIR200B/MIR939/HOXA5/ANGPT2/MIR217/MIR15B/MIR23B/MIR106B/MIR125B1/MIR19A/MIR19B1/NOTCH1/MIR375/MIR206/MIR320A/MIR214/MIR29A/MIR155/MIR29C/MIR503/SERPINE1/MIR146A/MIR138-1/AMOT/TGFB2/MIR495	44
GO:0017148	negative regulation of translation	46/468	198/17913	1.27988e-30	1.69174e-28	6.98149e-29	MIR205/MIR181A1/STAT3/MIRLET7A1/MIR204/MIR21/MIR218-1/MIR181B1/MIR17/MIR20A/MIR145/MIR210/MIR107/EIF4E/MIR222/MIR135B/MIR221/DHX36/MIR939/MIR148A/MIR15B/MIR106B/MIR125B1/MIR29B1/MIR106A/MIR19B1/MIR590/ILF3/MIR31/MIR200C/MIR124-1/MIR29A/MIR155/MIR503/MIR365A/NCL/MIR138-1/MIR182/RBM4/MIR299/CELF1/MIR1-1/MIR27B/MIR96/MIR132/TYMS	46
GO:2000181	negative regulation of blood vessel morphogenesis	44/468	179/17913	1.90971e-30	2.46114e-28	1.01566e-28	KLF2/MIR125A/MIR21/MIR24-1/MIR193A/MIR410/MIR143/MIR17/MIR20A/MIR424/MIR145/CTNNB1/MIR497/MIR34A/MIR222/MIR137/MIR221/MIR196A1/MIR200B/MIR939/HOXA5/ANGPT2/MIR217/MIR15B/MIR23B/MIR106B/MIR125B1/MIR19A/MIR19B1/NOTCH1/MIR375/MIR206/MIR320A/MIR214/MIR29A/MIR155/MIR29C/MIR503/SERPINE1/MIR146A/MIR138-1/AMOT/TGFB2/MIR495	44
GO:0000082	G1/S transition of mitotic cell cycle	52/468	269/17913	2.51531e-30	3.16254e-28	1.30512e-28	AKT1/BAX/BCL2/PTEN/CCND1/MYC/EZH2/LATS2/CDKN1A/CDK1/CDK2/CDKN1B/CDKN2B/TERT/SOX4/MIR21/MIR193A/PCNA/CCNE1/CDK6/CDKN2A/CCNB1/E2F1/TP53/EIF4E/MIR222/MIR137/MIR221/RB1/MIR15B/CDKN2C/MIR372/EGFR/MIR29B1/MIR590/CCND2/CCL2/MDM2/MIR214/MIR29A/MIR29C/AURKA/CDT1/CDK4/MIR138-1/CDC25C/CUL4A/EP300/ATM/MIR495/TYMS/ITGB1	52
GO:0045766	positive regulation of angiogenesis	46/468	203/17913	4.17252e-30	5.12128e-28	2.11345e-28	TWIST1/STAT3/MIR125A/MIR199A1/VEGFA/TERT/C5/MIR21/RUNX1/MIR181B1/MIR130A/MIR143/MIR20A/MIR210/MIR23A/IL10/FGF1/HIF1A/ANGPT2/SIRT1/MIR126/MIR23B/PTGS2/HMGA2/SP1/MIR150/MIR31/CXCR4/PDPK1/BMPER/CDH5/KDR/NFE2L2/MIR29A/MIR155/MIR503/SERPINE1/MIR146A/ANGPTL4/PKM/AKT3/WNT5A/MIR1-1/MIR27B/MIR132/ITGB1	46
GO:1904705	regulation of vascular smooth muscle cell proliferation	33/468	88/17913	8.49704e-30	9.95506e-28	4.10826e-28	PTEN/MMP2/MMP9/CDKN1A/CDKN1B/TERT/MIR21/PDCD4/MIR130A/MIR17/MIR20A/MIR424/MIR34A/MIR222/IL10/MIR135B/MIR137/MIR221/MIR301A/DNMT1/MEF2C/MIR140/MIR124-1/MDM2/MIR214/MIR503/MIR448/MIR182/TNF/PDGFB/MIR1-1/MIR27B/MIR96	33
GO:1990874	vascular smooth muscle cell proliferation	33/468	88/17913	8.49704e-30	9.95506e-28	4.10826e-28	PTEN/MMP2/MMP9/CDKN1A/CDKN1B/TERT/MIR21/PDCD4/MIR130A/MIR17/MIR20A/MIR424/MIR34A/MIR222/IL10/MIR135B/MIR137/MIR221/MIR301A/DNMT1/MEF2C/MIR140/MIR124-1/MDM2/MIR214/MIR503/MIR448/MIR182/TNF/PDGFB/MIR1-1/MIR27B/MIR96	33
GO:0070482	response to oxygen levels	60/468	389/17913	2.93351e-29	3.36049e-27	1.38681e-27	TWIST1/AKT1/BCL2/CASP3/PTEN/MYC/CDKN1A/CDKN1B/TGFB1/VEGFA/RAF1/TERT/MIR21/SUV39H1/MIR17/MIR210/SMAD3/FOXO1/CCNB1/MIR34A/E2F1/TP53/APAF1/HIF1A/ANGPT2/SIRT1/CAV1/MIR126/MIR106B/NOP53/PTGS2/FOXO3/NOTCH1/CXCR4/PRKAA1/LPAR1/PRKCE/STC1/SFRP1/MIR140/MIR124-1/MMP14/MDM2/MIR214/NFE2L2/MIR155/CDK4/MTOR/SMAD4/MIR146A/ANGPTL4/PKM/CREB1/EP300/TGFB2/ARNT2/ATM/EPAS1/FAS/ATG7	60
GO:0006417	regulation of translation	60/468	397/17913	9.16047e-29	1.02657e-26	4.23645e-27	MIR205/MIR181A1/VIM/AKT1/STAT3/MIRLET7A1/MAPK1/MAPK3/MIR204/SOX4/MIR21/MIR218-1/MIR181B1/MIR17/MIR20A/MIR145/MIR210/MIR107/EIF4E/MIR222/MIR135B/MIR221/DHX36/MIR939/QKI/ERBB2/MIR148A/MIR15B/MIR106B/MIR125B1/MKNK2/MIR29B1/MIR106A/FOXO3/MIR19B1/MIR590/ILF3/IL6/MIR31/MIR200C/MIR124-1/MIR29A/MIR155/MIR503/CDK4/MIR365A/MTOR/NCL/MIR138-1/C1QBP/MIR182/TNF/RBM4/MIR299/CELF1/MIR1-1/MIR27B/MIR96/MIR132/TYMS	60
GO:0071900	regulation of protein serine/threonine kinase activity	65/468	479/17913	2.38862e-28	2.61986e-26	1.08117e-26	AKT1/CASP3/PTEN/CCND1/EZH2/LATS2/CDKN1A/CCNC/CDK1/CDKN1B/CDKN2B/TGFB1/VEGFA/MAPK1/MAPK3/RAF1/C5/MIR24-1/FGFR1/PDCD4/MIR218-1/BIRC7/MIR20A/KIT/CDKN2A/CCNB1/IGF1R/FGF1/CDKN1C/ERBB2/SIRT1/RB1/CAV1/CDKN2C/HMGA2/NTRK3/EGFR/PIK3CB/DUSP6/ZEB2/CCND2/CXCR4/PRKAA1/LPAR1/ROBO1/MAP2K1/MAP2K2/MAPK10/SFRP1/SNCA/MIR26B/MAPK14/BMP4/DUSP7/CDK4/LRP6/CDC25C/TNF/IFNG/LATS1/CRKL/FZD5/PDGFB/PRKAR2A/WNT5A	65
GO:0010634	positive regulation of epithelial cell migration	41/468	173/17913	9.41989e-28	1.01166e-25	4.17491e-26	AKT1/MMP9/MIR199A1/TGFB1/VEGFA/MIR21/FGFR1/MIR143/MIR210/MIR222/MIR23A/MIR135B/MIR221/FGF1/MIR200A/MIR939/HIF1A/SIRT1/MIR126/MIR23B/PTGS2/SP1/MIR150/MIR31/PDPK1/PRKCE/HMGB1/BMP4/KDR/NFE2L2/MIR29A/MTOR/MIR146A/HAS2/IFNG/TGFB2/AKT3/PDGFB/WNT5A/MIR27B/MIR132	41
GO:0060485	mesenchyme development	48/468	258/17913	2.91426e-27	3.06592e-25	1.26525e-25	TWIST1/BCL2/PTEN/MYC/SMAD2/SNAI1/SNAI2/EZH2/ADIPOR1/SMAD7/TGFB1/MAPK1/MAPK3/MIR21/FGFR1/PDCD4/CTNNB1/GSK3B/SMAD3/FOXA2/FOXF1/MIR149/MIR222/MIR221/FN1/YAP1/HOXA5/HIF1A/HMGA2/MIR29B1/MEF2C/ZEB2/MIR590/NOTCH1/IL6/ROBO1/SFRP1/MDM2/BMP4/LRP6/MTOR/SMAD4/SOX11/HAS2/ZNF703/TGFB2/WNT5A/HES1	48
GO:0042326	negative regulation of phosphorylation	62/468	455/17913	3.73846e-27	3.85436e-25	1.59062e-25	TWIST1/AKT1/BAX/CASP3/PTEN/MYC/LATS2/CDKN1A/STAT3/CDKN1B/CDKN2B/SMAD7/TGFB1/MIR21/MIR24-1/PDCD4/MIR218-1/SPRY4/MIR20A/MIR424/MIR210/TIMP3/FOXO1/CDKN2A/FOXA2/CCNB1/NUPR1/IGF1R/MIR137/MIR221/CDKN1C/SIRT1/RB1/CAV1/MIR106B/NNT/CDKN2C/NTRK3/DUSP6/MIR29B1/CADM4/PDPK1/SFRP1/SNCA/MAPT/BMP4/UBE2B/HDAC4/DUSP7/MIR503/FABP4/LRP6/MTOR/SMAD4/FOXM1/MIR146A/TESC/MIR138-1/LATS1/CRKL/PRKAR2A/MIR132	62
GO:0048762	mesenchymal cell differentiation	42/468	199/17913	3.03252e-26	3.00628e-24	1.24063e-24	TWIST1/BCL2/PTEN/SMAD2/SNAI1/SNAI2/EZH2/ADIPOR1/SMAD7/TGFB1/MAPK1/MAPK3/MIR21/FGFR1/PDCD4/CTNNB1/GSK3B/SMAD3/FOXA2/MIR149/MIR222/MIR221/FN1/HIF1A/HMGA2/MIR29B1/MEF2C/ZEB2/MIR590/NOTCH1/IL6/SFRP1/BMP4/LRP6/MTOR/SMAD4/SOX11/HAS2/ZNF703/TGFB2/WNT5A/HES1	42
GO:0050679	positive regulation of epithelial cell proliferation	42/468	199/17913	3.03252e-26	3.00628e-24	1.24063e-24	TWIST1/AKT1/CCND1/MYC/STAT3/TGFB1/VEGFA/MIR21/FGFR1/MIR130A/CTNNB1/MIR23A/IL10/MIR135B/FGF1/ERBB2/HIF1A/AR/SIRT1/MIR126/MIR23B/EGFR/SP1/PDPK1/SFRP1/HMGB1/BMP4/KDR/MIR29A/MIR503/MTOR/MIR146A/SOX11/HAS2/NOTCH2/ZNF703/AKT3/PDGFB/WNT5A/MIR27B/MIR495/MIR132	42
GO:0001666	response to hypoxia	54/468	354/17913	3.85318e-26	3.74776e-24	1.54663e-24	TWIST1/AKT1/BCL2/CASP3/PTEN/MYC/CDKN1B/TGFB1/VEGFA/RAF1/TERT/MIR21/SUV39H1/MIR17/MIR210/SMAD3/CCNB1/MIR34A/E2F1/TP53/APAF1/HIF1A/ANGPT2/SIRT1/CAV1/MIR126/MIR106B/NOP53/PTGS2/FOXO3/NOTCH1/CXCR4/PRKAA1/PRKCE/STC1/SFRP1/MIR140/MIR124-1/MMP14/MDM2/MIR214/NFE2L2/MIR155/MTOR/SMAD4/MIR146A/ANGPTL4/PKM/CREB1/EP300/TGFB2/ARNT2/ATM/EPAS1	54
GO:1902807	negative regulation of cell cycle G1/S phase transition	35/468	130/17913	6.97451e-26	6.65807e-24	2.74766e-24	BAX/BCL2/PTEN/CCND1/EZH2/CDKN1A/CDK1/CDK2/CDKN1B/CDKN2B/SOX4/MIR21/MIR193A/PCNA/CDK6/CDKN2A/CCNB1/E2F1/TP53/MIR137/RB1/MIR15B/CDKN2C/MIR29B1/CCL2/MDM2/MIR29A/MIR29C/AURKA/MIR503/CDK4/MIR138-1/CDC25C/EP300/ATM	35
GO:0043410	positive regulation of MAPK cascade	63/468	499/17913	1.01937e-25	9.32156e-24	3.84683e-24	MIR181A1/PTEN/SOX2/EZH2/CDK1/TGFB1/VEGFA/CDH2/MAPK1/MAPK3/RAF1/C5/MIR21/MIR24-1/FGFR1/BIRC7/MIR181B1/KIT/CTNNB1/CD44/MIR222/MIR23A/MIR221/FGF1/ERBB2/AR/MIR126/MIR23B/LTBR/NTRK3/EGFR/PIK3CB/DUSP6/ZEB2/NOTCH1/TIMP2/IL6/CXCR4/PRKAA1/BMPER/LPAR1/PRKCE/ROBO1/MAP2K1/MAP2K2/MAPK10/MAPK14/HMGB1/RAP1B/CD36/BMP4/KDR/DUSP7/CALCR/NOTCH2/FBXW7/TNF/TGFB2/CRKL/FZD5/PDGFB/WNT5A/MIR27B	63
GO:0101023	vascular endothelial cell proliferation	24/468	48/17913	1.03071e-25	9.32156e-24	3.84683e-24	STAT3/MIR21/MIR24-1/MIR193A/FGFR1/MIR152/MIR130A/MIR424/MIR34A/MIR135B/MIR126/MIR15B/SP1/MEF2C/PDPK1/HMGB1/MIR129-1/CCL2/MIR29A/MIR29C/MIR503/AKT3/MIR495/MIR132	24
GO:1905562	regulation of vascular endothelial cell proliferation	24/468	48/17913	1.03071e-25	9.32156e-24	3.84683e-24	STAT3/MIR21/MIR24-1/MIR193A/FGFR1/MIR152/MIR130A/MIR424/MIR34A/MIR135B/MIR126/MIR15B/SP1/MEF2C/PDPK1/HMGB1/MIR129-1/CCL2/MIR29A/MIR29C/MIR503/AKT3/MIR495/MIR132	24
GO:2000377	regulation of reactive oxygen species metabolic process	41/468	194/17913	1.14799e-25	1.02033e-23	4.21069e-24	MIR181A1/AKT1/BCL2/KLF2/CDKN1A/STAT3/ACE2/MIR199A1/TGFB1/MIR21/MIR24-1/MIR181B1/SMAD3/FOXO1/TP53/IL10/ATG5/MMP3/HIF1A/CAV1/NNT/PTGS2/EGFR/FOXO3/MIR590/SNCA/MAPK14/CD36/MAPT/RAC2/NFE2L2/HDAC4/MIR155/MTOR/FOXM1/TNF/IFNG/BCR/PDGFB/MIR27B/MIR132	41
GO:0036293	response to decreased oxygen levels	54/468	365/17913	1.78119e-25	1.55628e-23	6.42246e-24	TWIST1/AKT1/BCL2/CASP3/PTEN/MYC/CDKN1B/TGFB1/VEGFA/RAF1/TERT/MIR21/SUV39H1/MIR17/MIR210/SMAD3/CCNB1/MIR34A/E2F1/TP53/APAF1/HIF1A/ANGPT2/SIRT1/CAV1/MIR126/MIR106B/NOP53/PTGS2/FOXO3/NOTCH1/CXCR4/PRKAA1/PRKCE/STC1/SFRP1/MIR140/MIR124-1/MMP14/MDM2/MIR214/NFE2L2/MIR155/MTOR/SMAD4/MIR146A/ANGPTL4/PKM/CREB1/EP300/TGFB2/ARNT2/ATM/EPAS1	54
GO:2000134	negative regulation of G1/S transition of mitotic cell cycle	34/468	124/17913	1.82969e-25	1.57201e-23	6.48738e-24	BAX/BCL2/PTEN/CCND1/EZH2/CDKN1A/CDK1/CDK2/CDKN1B/CDKN2B/SOX4/MIR21/MIR193A/PCNA/CDK6/CDKN2A/CCNB1/E2F1/TP53/MIR137/RB1/MIR15B/CDKN2C/MIR29B1/CCL2/MDM2/MIR29A/MIR29C/AURKA/CDK4/MIR138-1/CDC25C/EP300/ATM	34
GO:2001233	regulation of apoptotic signaling pathway	56/468	397/17913	2.4685e-25	2.08609e-23	8.60887e-24	AKT1/BAX/BCL2/PARP1/PTEN/MMP9/SNAI1/SNAI2/KDM1A/MAPK8/RAF1/TERT/BDNF/MIR21/FGFR1/MIR17/MIR210/CTNNB1/GSK3B/TIMP3/SMAD3/CD44/NUPR1/E2F1/TP53/MIR222/APAF1/MIR221/YAP1/HIF1A/AR/SIRT1/RB1/TNFRSF10B/CAV1/TNFSF10/LTBR/PTGS2/SFPQ/TNFRSF10A/MAPK9/SFRP1/MIR26B/CCAR2/CASP8/MDM2/BMP4/NFE2L2/SERPINE1/MCL1/WWOX/FBXW7/FAIM2/TNF/FAS/MIR132	56
GO:0010633	negative regulation of epithelial cell migration	33/468	116/17913	2.55799e-25	2.12684e-23	8.77707e-24	PTEN/ADIPOR1/TGFB1/MIR204/MIR21/MIR24-1/MIR193A/MIR410/MIR152/MIR20A/MIR424/MIR497/MIR137/MIR221/MIR196A1/MIR200B/ANGPT2/MIR15B/MEF2C/MIR19B1/NOTCH1/EPPK1/STC1/MIR206/HMGB1/MIR129-1/MIR320A/MIR155/MIR29C/MIR503/MIR146A/MIR495/MIR132	33
GO:0002042	cell migration involved in sprouting angiogenesis	31/468	101/17913	5.63969e-25	4.6147e-23	1.9044e-23	AKT1/VEGFA/MIR193A/MIR410/MIR20A/MIR424/MIR497/MIR23A/MIR221/MIR196A1/MIR126/MIR23B/PTGS2/MIR150/MIR19B1/NOTCH1/MIR31/ROBO1/MIR206/MIR320A/KDR/MIR155/MIR29C/MIR503/MIR146A/FBXW7/AKT3/MIR27B/MIR495/MIR132/ITGB1	31
GO:0010595	positive regulation of endothelial cell migration	34/468	129/17913	7.71115e-25	6.21109e-23	2.5632e-23	AKT1/MIR199A1/TGFB1/VEGFA/MIR21/FGFR1/MIR143/MIR210/MIR23A/MIR135B/MIR221/FGF1/MIR200A/MIR939/HIF1A/SIRT1/MIR126/MIR23B/PTGS2/SP1/MIR150/MIR31/PDPK1/HMGB1/BMP4/KDR/NFE2L2/MIR29A/MIR146A/AKT3/PDGFB/WNT5A/MIR27B/MIR132	34
GO:0034599	cellular response to oxidative stress	48/468	296/17913	1.64558e-24	1.30507e-22	5.38576e-23	AKT1/BCL2/PARP1/MMP2/MMP9/EZH2/KLF2/CDK1/CDK2/SLC7A11/MAPK1/MAPK3/MAPK8/MIR21/MIR17/PCNA/CTNNB1/FOXO1/MIR107/MIR34A/TP53/IL10/MMP3/HIF1A/SIRT1/MIR19A/EGFR/MIR195/MIR29B1/FOXO3/SFPQ/IL6/MAPK9/PRKAA1/SNCA/PXN/CD36/MAPT/MDM2/NFE2L2/MIR155/MCL1/FBXW7/STAU1/TNF/EPAS1/MIR132/ATG7	48
GO:0043536	positive regulation of blood vessel endothelial cell migration	28/468	80/17913	1.77902e-24	1.38952e-22	5.73429e-23	AKT1/TGFB1/VEGFA/FGFR1/MIR143/MIR210/MIR23A/MIR135B/MIR221/MIR200A/MIR939/HIF1A/SIRT1/MIR126/MIR23B/PTGS2/SP1/MIR150/MIR31/PDPK1/HMGB1/KDR/NFE2L2/MIR146A/AKT3/PDGFB/MIR27B/MIR132	28
GO:0001933	negative regulation of protein phosphorylation	56/468	416/17913	2.64109e-24	2.01213e-22	8.30368e-23	TWIST1/AKT1/BAX/CASP3/PTEN/MYC/LATS2/CDKN1A/CDKN1B/CDKN2B/SMAD7/TGFB1/MIR21/MIR24-1/PDCD4/MIR218-1/SPRY4/MIR20A/MIR424/TIMP3/FOXO1/CDKN2A/CCNB1/IGF1R/MIR137/MIR221/CDKN1C/SIRT1/RB1/CAV1/MIR106B/NNT/CDKN2C/NTRK3/DUSP6/MIR29B1/CADM4/PDPK1/SFRP1/SNCA/BMP4/UBE2B/DUSP7/MIR503/FABP4/LRP6/MTOR/SMAD4/FOXM1/MIR146A/TESC/MIR138-1/LATS1/CRKL/PRKAR2A/MIR132	56
GO:0043537	negative regulation of blood vessel endothelial cell migration	28/468	81/17913	2.65422e-24	2.01213e-22	8.30368e-23	TGFB1/MIR204/MIR24-1/MIR193A/MIR410/MIR152/MIR20A/MIR424/MIR497/MIR137/MIR221/MIR196A1/MIR200B/ANGPT2/MIR15B/MEF2C/MIR19B1/NOTCH1/MIR206/HMGB1/MIR129-1/MIR320A/MIR155/MIR29C/MIR503/MIR146A/MIR495/MIR132	28
GO:0010596	negative regulation of endothelial cell migration	30/468	99/17913	5.05783e-24	3.77871e-22	1.5594e-22	TGFB1/MIR204/MIR21/MIR24-1/MIR193A/MIR410/MIR152/MIR20A/MIR424/MIR497/MIR137/MIR221/MIR196A1/MIR200B/ANGPT2/MIR15B/MEF2C/MIR19B1/NOTCH1/STC1/MIR206/HMGB1/MIR129-1/MIR320A/MIR155/MIR29C/MIR503/MIR146A/MIR495/MIR132	30
GO:0045930	negative regulation of mitotic cell cycle	48/468	308/17913	9.86537e-24	7.26514e-22	2.99818e-22	BAX/BCL2/PTEN/CCND1/EZH2/CDKN1A/CDK1/CDK2/CDKN1B/CDKN2B/TGFB1/SOX4/MIR21/MIR193A/PCNA/CTNNB1/SMAD3/CDK6/CDKN2A/CCNB1/E2F1/TP53/IL10/MIR137/RB1/MIR15B/NOP53/VPS4A/CDKN2C/HMGA2/EGFR/MIR195/MIR29B1/MIR19B1/TIMP2/CCL2/MDM2/BMP4/MIR29A/MIR29C/AURKA/CDT1/CDK4/MIR138-1/CDC25C/TNF/EP300/ATM	48
GO:0090049	regulation of cell migration involved in sprouting angiogenesis	28/468	85/17913	1.23564e-23	8.97143e-22	3.70234e-22	VEGFA/MIR193A/MIR410/MIR20A/MIR424/MIR497/MIR23A/MIR221/MIR196A1/MIR126/MIR23B/PTGS2/MIR150/MIR19B1/NOTCH1/MIR31/MIR206/MIR320A/KDR/MIR155/MIR29C/MIR503/MIR146A/FBXW7/AKT3/MIR27B/MIR495/MIR132	28
GO:1901987	regulation of cell cycle phase transition	58/468	464/17913	1.72034e-23	1.23171e-21	5.08304e-22	PAGR1/AKT1/BAX/BCL2/PTEN/CCND1/EZH2/CDKN1A/CDK1/CDK2/CDKN1B/CDKN2B/TGFB1/TERT/SOX4/MIR21/MIR193A/PCNA/CCNE1/CDK6/CDKN2A/CCNB1/E2F1/TP53/MIR222/MIR137/MIR221/CDKN1C/RB1/MIR15B/NOP53/VPS4A/CDKN2C/MIR372/HMGA2/EGFR/MIR195/MIR29B1/MIR19B1/MIR590/CCND2/HMMR/CCL2/MDM2/MIR214/MIR29A/MIR29C/AURKA/CDT1/MIR503/CDK4/MIR138-1/FBXW7/CDC25C/CUL4A/EP300/ATM/MIR495	58
GO:0035051	cardiocyte differentiation	35/468	154/17913	3.47812e-23	2.45612e-21	1.01359e-21	TWIST1/CDK1/MIR199A1/TGFB1/VEGFA/MAPK1/MAPK3/MIR204/MIR21/MIR24-1/PDCD4/MIR145/CCNB1/SIK1/MIR222/MIR23A/ATG5/DHX36/MIR200B/MIR23B/MIR19A/EGFR/MIR195/MAML1/MEF2C/MIR19B1/MIR590/NOTCH1/BMP4/MTOR/SMAD4/TGFB2/MIR1-1/HES1/ITGB1	35
GO:0071453	cellular response to oxygen levels	42/468	237/17913	4.2092e-23	2.93222e-21	1.21007e-21	TWIST1/AKT1/BCL2/PTEN/MYC/VEGFA/TERT/MIR21/SUV39H1/MIR17/MIR210/FOXO1/CCNB1/MIR34A/E2F1/TP53/HIF1A/SIRT1/CAV1/MIR126/MIR106B/NOP53/PTGS2/FOXO3/NOTCH1/PRKAA1/LPAR1/PRKCE/STC1/SFRP1/MIR140/MIR124-1/MDM2/MIR214/NFE2L2/MIR155/MTOR/MIR146A/EP300/EPAS1/FAS/ATG7	42
GO:0030099	myeloid cell differentiation	54/468	411/17913	5.98936e-23	4.11669e-21	1.69888e-21	CASP3/CASP9/PARP1/MMP9/MYC/KLF2/STAT3/CDKN2B/TGFB1/VEGFA/RBM15/CDC42/WDR5/RUNX1/ZBTB7A/KIT/CTNNB1/CDK6/ANXA2/MIR222/MIR221/CDKN1C/HOXA5/HIF1A/SIRT1/ARID4A/RB1/FASN/MIR125B1/HOXA7/HOXA9/LTBR/FOXO3/MEF2C/PTBP3/CA2/CSF1/SFRP1/MAPK14/CASP8/BMP4/KMT2A/MTOR/TESC/NOTCH2/FBXW7/ESRRA/TNF/IFNG/HOXB7/CUL4A/CREB1/EP300/EPAS1	54
GO:1901990	regulation of mitotic cell cycle phase transition	55/468	428/17913	6.85473e-23	4.64949e-21	1.91876e-21	AKT1/BAX/BCL2/PTEN/CCND1/EZH2/CDKN1A/CDK1/CDK2/CDKN1B/CDKN2B/TGFB1/TERT/SOX4/MIR21/MIR193A/PCNA/CCNE1/CDK6/CDKN2A/CCNB1/E2F1/TP53/MIR222/MIR137/MIR221/CDKN1C/RB1/MIR15B/NOP53/VPS4A/CDKN2C/MIR372/HMGA2/EGFR/MIR195/MIR29B1/MIR19B1/MIR590/CCND2/HMMR/CCL2/MDM2/MIR214/MIR29A/MIR29C/AURKA/CDT1/CDK4/MIR138-1/CDC25C/CUL4A/EP300/ATM/MIR495	55
GO:0090068	positive regulation of cell cycle process	45/468	283/17913	1.13673e-22	7.61017e-21	3.14057e-21	PAGR1/AKT1/BAX/CCND1/EZH2/CDKN1A/CDK1/CDK2/CDKN1B/TGFB1/TERT/CDC42/SOX4/FGFR1/PCNA/CCNE1/CCNB1/MIR34A/E2F1/TP53/MIR222/MIR221/MIR200B/RB1/MIR372/HMGA2/EGFR/SFPQ/MIR590/CCND2/PRKCE/MDM2/UBE2B/MIR214/MIR29A/AURKA/CDT1/CDK4/CDC25C/CUL4A/EP300/ATM/PDGFB/WNT5A/MIR495	45
GO:0010657	muscle cell apoptotic process	29/468	100/17913	1.18323e-22	7.81994e-21	3.22714e-21	PTEN/MIR199A1/MIR21/MIR24-1/PDCD4/MIR17/MIR20A/MIR145/MIR210/CDKN2A/NUPR1/MIR34A/TP53/APAF1/SIRT1/DNMT1/MIR106B/MIR19A/MIR195/MIR19B1/MIR590/PDPK1/MIR140/MIR320A/NFE2L2/LRP6/MIR138-1/IFNG/MIR1-1	29
GO:0045787	positive regulation of cell cycle	51/468	373/17913	1.6618e-22	1.08437e-20	4.475e-21	PAGR1/AKT1/BAX/CCND1/EZH2/CDKN1A/CDK1/CDK2/CDKN1B/TGFB1/TERT/CDC42/SOX4/FGFR1/PCNA/CCNE1/CCNB1/MIR34A/E2F1/TP53/EIF4E/MIR222/IL10/MIR221/MIR200B/RB1/MIR372/HMGA2/EGFR/SFPQ/MIR590/CCND2/PRKCE/MIR26B/MDM2/UBE2B/MIR214/MIR29A/AURKA/CDT1/CDK4/LRP6/CDC25C/CUL4A/EP300/TGFB2/ATM/PDGFB/WNT5A/MIR495/HES1	51
GO:0001837	epithelial to mesenchymal transition	33/468	140/17913	1.83656e-22	1.18343e-20	4.8838e-21	TWIST1/PTEN/SMAD2/SNAI1/SNAI2/EZH2/ADIPOR1/SMAD7/TGFB1/MIR21/PDCD4/CTNNB1/GSK3B/SMAD3/FOXA2/MIR149/MIR222/MIR221/HIF1A/HMGA2/MIR29B1/MIR590/NOTCH1/IL6/SFRP1/BMP4/LRP6/MTOR/SMAD4/HAS2/ZNF703/TGFB2/WNT5A	33
GO:0006979	response to oxidative stress	55/468	442/17913	3.27138e-22	2.08197e-20	8.59188e-21	AKT1/BCL2/CASP3/PARP1/MMP2/MMP9/KRT1/EZH2/KLF2/CDK1/CDK2/ABCC2/SLC7A11/MAPK1/MAPK3/MAPK8/MIR21/MIR17/PCNA/CTNNB1/FOXO1/MIR107/MIR34A/TP53/IL10/MMP3/HIF1A/SIRT1/MIR19A/PTGS2/EGFR/MIR195/MIR29B1/SP1/FOXO3/SFPQ/IL6/MAPK9/PRKAA1/SNCA/MMP14/PXN/CD36/MAPT/MDM2/NFE2L2/MIR155/MCL1/FBXW7/STAU1/TNF/IDH1/EPAS1/MIR132/ATG7	55
GO:0010660	regulation of muscle cell apoptotic process	28/468	96/17913	5.4542e-22	3.42883e-20	1.41501e-20	PTEN/MIR199A1/MIR21/MIR24-1/PDCD4/MIR17/MIR20A/MIR145/MIR210/CDKN2A/NUPR1/MIR34A/TP53/SIRT1/DNMT1/MIR106B/MIR19A/MIR195/MIR19B1/MIR590/PDPK1/MIR140/MIR320A/NFE2L2/LRP6/MIR138-1/IFNG/MIR1-1	28
GO:0001655	urogenital system development	47/468	324/17913	6.67617e-22	4.14646e-20	1.71117e-20	BAX/BCL2/CASP9/PTEN/MMP9/MYC/SMAD2/CDKN1B/MIR125A/SMAD7/TGFB1/VEGFA/GLI2/SOX4/FGFR1/HOXB13/CTNNB1/SMAD3/FOXF1/APAF1/FGF1/YAP1/CDKN1C/AR/ANGPT2/HOXA11/SDC4/MEF2C/POU3F3/BMPER/CA2/SFRP1/BMP4/COL4A1/SMAD4/PTCH1/NOTCH3/PROM1/SOX11/HAS2/HOXB7/TGFB2/CRKL/PDGFB/WNT5A/WNT6/HES1	47
GO:1903671	negative regulation of sprouting angiogenesis	26/468	80/17913	7.33459e-22	4.50117e-20	1.85754e-20	KLF2/MIR24-1/MIR193A/MIR410/MIR17/MIR20A/MIR424/MIR497/MIR34A/MIR222/MIR221/MIR196A1/MIR15B/MIR23B/MIR19A/MIR19B1/NOTCH1/MIR375/MIR206/MIR320A/MIR155/MIR29C/MIR503/MIR146A/MIR138-1/MIR495	26
GO:0002521	leukocyte differentiation	57/468	485/17913	9.16581e-22	5.5588e-20	2.29401e-20	BAX/BCL2/PARP1/MMP9/MYC/ZEB1/STAT3/RUNX2/SMAD7/TGFB1/VEGFA/GLI2/CDC42/SOX4/MIR21/RUNX1/ZBTB7A/KIT/CTNNB1/CDK6/TP53/ANXA2/IL10/ATG5/ERBB2/SIRT1/RB1/FASN/RUNX3/MIR125B1/HOXA7/LTBR/MEF2C/IL6/CA2/CSF1/SFRP1/MAPK14/MMP14/HMGB1/CASP8/BMP4/HDAC4/MIR155/MTOR/TESC/NOTCH2/FBXW7/ESRRA/TNF/IFNG/CUL4A/CREB1/EP300/ATM/FZD5/ITGB1	57
GO:0042063	gliogenesis	44/468	285/17913	1.16404e-21	6.97748e-20	2.87947e-20	VIM/AKT1/PTEN/SOX2/EZH2/CDK1/STAT3/TGFB1/CDH2/MAPK1/MAPK3/TERT/SOX4/MIR181B1/CTNNB1/CDK6/IL33/E2F1/MIR222/MIR221/ERBB2/MIR125B1/CDKN2C/NTRK3/EGFR/NOTCH1/IL6/CXCR4/CSF1/DRD1/LPAR1/MAP2K1/MMP14/MIR142/CCL2/MAPT/MTOR/MIR146A/SOX11/TNF/CREB1/TGFB2/CRKL/HES1	44
GO:0048732	gland development	53/468	422/17913	1.28765e-21	7.62972e-20	3.14864e-20	AKT1/BAX/BCL2/PTEN/CCND1/SMAD2/SNAI2/SOX2/EZH2/CDH1/IGF2R/CDKN1B/TGFB1/VEGFA/MAPK1/MAPK3/RAF1/GLI2/FGFR1/HOXB13/PCNA/CTNNB1/SMAD3/FOXF1/IL10/CDKN1C/HOXA5/HIF1A/AR/CAV1/FASN/HOXA9/EGFR/CSF1/ROBO1/MAP2K1/SFRP1/BMP4/AURKA/SMAD4/PTCH1/FBXW7/ZNF703/TNF/PKM/LATS1/CREB1/TGFB2/ATM/CRKL/WNT5A/HES1/TYMS	53
GO:0035690	cellular response to drug	49/468	362/17913	1.84097e-21	1.07843e-19	4.45048e-20	VIM/CASP9/PTEN/MYC/EZH2/KLF2/CDH1/CDK1/CDK2/ABCC2/TGFB1/MAPK1/MAPK3/MIR21/MIR17/PCNA/CTNNB1/FOXO1/MIR107/MIR34A/TP53/EIF4E/IL10/MMP3/SIRT1/PTGS2/HMGA2/EGFR/FOXO3/MEF2C/IL6/NFKB1/CXCR4/PRKAA1/DRD1/PRKCE/SFRP1/RAP1B/MDM2/KDR/NFE2L2/MIR155/KMT2A/CDK4/TNF/HSPA5/CRKL/PDGFB/ATG7	49
GO:1901991	negative regulation of mitotic cell cycle phase transition	40/468	235/17913	2.2308e-21	1.29211e-19	5.33228e-20	BAX/BCL2/PTEN/CCND1/EZH2/CDKN1A/CDK1/CDK2/CDKN1B/CDKN2B/SOX4/MIR21/MIR193A/PCNA/CDK6/CDKN2A/CCNB1/E2F1/TP53/MIR137/RB1/MIR15B/NOP53/VPS4A/CDKN2C/HMGA2/MIR195/MIR29B1/MIR19B1/CCL2/MDM2/MIR29A/MIR29C/AURKA/CDT1/CDK4/MIR138-1/CDC25C/EP300/ATM	40
GO:0097191	extrinsic apoptotic signaling pathway	38/468	213/17913	4.17835e-21	2.39326e-19	9.87654e-20	AKT1/BAX/BCL2/CASP3/CASP9/PTEN/SNAI2/TGFB1/RAF1/TERT/FGFR1/GSK3B/TIMP3/SMAD3/IL33/MIR222/MIR221/YAP1/AR/TNFRSF10B/CAV1/TNFSF10/LTBR/MKNK2/FOXO3/TNFRSF10A/PDPK1/SFRP1/CASP8/BMP4/SERPINE1/MCL1/WWOX/FAIM2/TNF/IFNG/TGFB2/FAS	38
GO:1901988	negative regulation of cell cycle phase transition	41/468	254/17913	5.42419e-21	3.07271e-19	1.26805e-19	BAX/BCL2/PTEN/CCND1/EZH2/CDKN1A/CDK1/CDK2/CDKN1B/CDKN2B/SOX4/MIR21/MIR193A/PCNA/CDK6/CDKN2A/CCNB1/E2F1/TP53/MIR137/RB1/MIR15B/NOP53/VPS4A/CDKN2C/HMGA2/MIR195/MIR29B1/MIR19B1/CCL2/MDM2/MIR29A/MIR29C/AURKA/CDT1/MIR503/CDK4/MIR138-1/CDC25C/EP300/ATM	41
GO:0048608	reproductive structure development	52/468	426/17913	1.16787e-20	6.54386e-19	2.70052e-19	AKT1/BAX/BCL2/CASP3/PTEN/CCND1/SNAI1/CDKN1B/VEGFA/RBM15/MAPK1/MAPK3/GLI2/HOXB13/KIT/CTNNB1/NUPR1/IL10/CDKN1C/HIF1A/SETD2/AR/SIRT1/ARID4A/HOXA10/HOXA11/HOXA9/TNFSF10/PTGS2/EGFR/FOXO3/STC1/MAP2K1/SFRP1/MAPK14/MMP14/PTK2/CASP8/BMP4/SMAD4/PTCH1/TESC/HSPA5/IDH1/TGFB2/ATM/CRKL/EPAS1/FZD5/PDGFB/WNT5A/HES1	52
GO:0001938	positive regulation of endothelial cell proliferation	28/468	107/17913	1.43487e-20	7.95351e-19	3.28226e-19	AKT1/STAT3/VEGFA/MIR21/FGFR1/MIR130A/MIR23A/IL10/MIR135B/HIF1A/SIRT1/MIR126/MIR23B/SP1/PDPK1/HMGB1/BMP4/KDR/MIR29A/MIR503/MTOR/MIR146A/AKT3/PDGFB/WNT5A/MIR27B/MIR495/MIR132	28
GO:0061458	reproductive system development	52/468	429/17913	1.60518e-20	8.80285e-19	3.63277e-19	AKT1/BAX/BCL2/CASP3/PTEN/CCND1/SNAI1/CDKN1B/VEGFA/RBM15/MAPK1/MAPK3/GLI2/HOXB13/KIT/CTNNB1/NUPR1/IL10/CDKN1C/HIF1A/SETD2/AR/SIRT1/ARID4A/HOXA10/HOXA11/HOXA9/TNFSF10/PTGS2/EGFR/FOXO3/STC1/MAP2K1/SFRP1/MAPK14/MMP14/PTK2/CASP8/BMP4/SMAD4/PTCH1/TESC/HSPA5/IDH1/TGFB2/ATM/CRKL/EPAS1/FZD5/PDGFB/WNT5A/HES1	52
GO:0071456	cellular response to hypoxia	37/468	210/17913	2.19389e-20	1.19047e-18	4.91285e-19	TWIST1/AKT1/BCL2/PTEN/MYC/VEGFA/TERT/MIR21/SUV39H1/MIR17/MIR210/CCNB1/MIR34A/E2F1/TP53/HIF1A/SIRT1/MIR126/MIR106B/NOP53/PTGS2/FOXO3/NOTCH1/PRKAA1/PRKCE/STC1/SFRP1/MIR140/MIR124-1/MDM2/MIR214/NFE2L2/MIR155/MTOR/MIR146A/EP300/EPAS1	37
GO:0048661	positive regulation of smooth muscle cell proliferation	27/468	101/17913	3.81427e-20	2.04818e-18	8.45245e-19	AKT1/MMP2/MMP9/TERT/MIR21/MIR130A/MIR17/MIR20A/MIR222/IL10/MIR135B/MIR221/MIR301A/DNMT1/PTGS2/EGFR/IL6/MDM2/BMP4/MIR214/HDAC4/MIR448/MTOR/NOTCH3/TNF/PDGFB/MIR27B	27
GO:0051145	smooth muscle cell differentiation	24/468	75/17913	4.2952e-20	2.28266e-18	9.42008e-19	ZEB1/TGFB1/VEGFA/MIR21/PDCD4/MIR424/MIR145/KIT/CTNNB1/FOXF1/MIR34A/MIR221/SIRT1/DNMT1/MIR15B/MIR125B1/MEF2C/NOTCH1/MIR140/MIR124-1/BMP4/PDGFB/MIR1-1/HES1	24
GO:0072593	reactive oxygen species metabolic process	41/468	269/17913	4.87802e-20	2.56594e-18	1.05891e-18	MIR181A1/AKT1/BCL2/KLF2/CDKN1A/STAT3/ACE2/MIR199A1/TGFB1/MIR21/MIR24-1/MIR181B1/SMAD3/FOXO1/TP53/IL10/ATG5/MMP3/HIF1A/CAV1/NNT/PTGS2/EGFR/FOXO3/MIR590/SNCA/MAPK14/CD36/MAPT/RAC2/NFE2L2/HDAC4/MIR155/MTOR/FOXM1/TNF/IFNG/BCR/PDGFB/MIR27B/MIR132	41
GO:0010948	negative regulation of cell cycle process	46/468	344/17913	5.54268e-20	2.88611e-18	1.19104e-18	BAX/BCL2/PTEN/CCND1/EZH2/CDKN1A/CDK1/CDK2/CDKN1B/CDKN2B/SUZ12/SOX4/MIR21/MIR193A/MIR424/PCNA/CDK6/CDKN2A/CCNB1/E2F1/TP53/APAF1/MIR137/RB1/MIR15B/NOP53/VPS4A/CDKN2C/HMGA2/MIR195/MIR29B1/MIR19B1/CCL2/MDM2/BMP4/MIR29A/MIR29C/AURKA/CDT1/MIR503/CDK4/MIR138-1/FBXW7/CDC25C/EP300/ATM	46
GO:0070997	neuron death	46/468	347/17913	7.91993e-20	4.00795e-18	1.654e-18	AKT1/BAX/BCL2/CASP3/CASP9/PARP1/NES/STAT3/SLC7A11/TERT/CLN3/CTNNB1/GSK3B/NUPR1/TP53/APAF1/IL10/MIR200A/HIF1A/SIRT1/RB1/MIR15B/MIR125B1/FOXO3/MEF2C/PDPK1/MIR200C/CSF1/MYBL2/SNCA/MIR124-1/CCL2/MAPT/CASP8/HDAC4/MTOR/MCL1/FBXW7/FAIM2/TNF/HSPA5/CREB1/TGFB2/ATM/WNT5A/ATG7	46
GO:0007050	cell cycle arrest	38/468	231/17913	7.93038e-20	4.00795e-18	1.654e-18	BAX/CCND1/MYC/SOX2/CDKN1A/CDK1/CDK2/CDKN1B/CDKN2B/TGFB1/SOX4/PCNA/SMAD3/CDK6/CDKN2A/CCNB1/MIR34A/E2F1/TP53/CDKN1C/MIR200B/RB1/CDKN2C/HMGA2/NOTCH1/PRKAA1/MAP2K1/MDM2/AURKA/CDK4/MTOR/FOXM1/NOTCH2/CDC25C/IFNG/EP300/TGFB2/ATM	38
GO:0018105	peptidyl-serine phosphorylation	38/468	231/17913	7.93038e-20	4.00795e-18	1.654e-18	AKT1/BAX/BCL2/CDK1/CDK2/SMAD7/TGFB1/VEGFA/MAPK1/MAPK3/MAPK8/RAF1/GSK3B/CD44/CCNB1/CAV1/PTGS2/HMGA2/NTRK3/EGFR/IL6/MAPK9/PRKAA1/DRD1/PRKCE/MAP2K2/SNCA/MAPK14/AURKA/CALCR/MTOR/TNF/IFNG/LATS1/ATM/PDGFB/WNT5A/MIR132	38
GO:0036294	cellular response to decreased oxygen levels	37/468	220/17913	1.1367e-19	5.68901e-18	2.34774e-18	TWIST1/AKT1/BCL2/PTEN/MYC/VEGFA/TERT/MIR21/SUV39H1/MIR17/MIR210/CCNB1/MIR34A/E2F1/TP53/HIF1A/SIRT1/MIR126/MIR106B/NOP53/PTGS2/FOXO3/NOTCH1/PRKAA1/PRKCE/STC1/SFRP1/MIR140/MIR124-1/MDM2/MIR214/NFE2L2/MIR155/MTOR/MIR146A/EP300/EPAS1	37
GO:0090287	regulation of cellular response to growth factor stimulus	41/468	276/17913	1.29001e-19	6.39425e-18	2.63878e-18	SMAD2/ZEB1/RUNX2/CDKN2B/SMAD7/TGFB1/VEGFA/FGFR1/MIR20A/ZBTB7A/MIR424/CTNNB1/SMAD3/TP53/FGF1/CDKN1C/HIF1A/SIRT1/CAV1/MIR15B/NTRK3/MIR29B1/CADM4/NOTCH1/PDPK1/ADAMTS12/BMPER/ROBO1/SFRP1/MIR140/BMP4/MIR503/SMAD4/MIR146A/SOX11/ZNF703/HSPA5/EP300/WNT5A/MIR1-1/HES1	41
GO:0072001	renal system development	42/468	291/17913	1.37672e-19	6.75902e-18	2.78932e-18	BAX/BCL2/CASP9/MMP9/MYC/SMAD2/MIR125A/SMAD7/TGFB1/VEGFA/GLI2/SOX4/FGFR1/CTNNB1/SMAD3/FOXF1/APAF1/FGF1/YAP1/CDKN1C/ANGPT2/HOXA11/SDC4/MEF2C/POU3F3/BMPER/CA2/SFRP1/BMP4/COL4A1/SMAD4/PTCH1/NOTCH3/PROM1/SOX11/HAS2/HOXB7/TGFB2/PDGFB/WNT5A/WNT6/HES1	42
GO:2001234	negative regulation of apoptotic signaling pathway	37/468	223/17913	1.82825e-19	8.89115e-18	3.6692e-18	AKT1/BAX/BCL2/MMP9/SNAI1/SNAI2/KDM1A/RAF1/TERT/BDNF/MIR21/MIR17/MIR210/CTNNB1/CD44/MIR222/MIR221/YAP1/HIF1A/AR/SIRT1/RB1/TNFRSF10B/TNFSF10/PTGS2/TNFRSF10A/CCAR2/CASP8/MDM2/BMP4/NFE2L2/SERPINE1/MCL1/FAIM2/TNF/FAS/MIR132	37
GO:0051052	regulation of DNA metabolic process	49/468	403/17913	1.92771e-19	9.28723e-18	3.83266e-18	TWIST1/AKT1/BAX/PARP1/MYC/KDM1A/CDKN1A/CDK1/CDK2/TGFB1/MAPK1/MAPK3/GLI2/FGFR1/PCNA/CTNNB1/TP53/APAF1/IL10/MIR221/ATF1/DHX36/SETD2/SIRT1/DNMT1/MORC2/NUCKS1/HMGA2/EGFR/MIR29B1/IL6/ACTR2/CCT4/HMGB1/UBE2B/MIR29A/MIR155/KMT2A/MIR29C/CDT1/FUS/FOXM1/MIR146A/FBXW7/CUL4A/HNRNPA2B1/ATM/PDGFB/ATG7	49
GO:0001503	ossification	48/468	388/17913	2.23407e-19	1.06636e-17	4.40064e-18	TWIST1/AKT1/BCL2/MMP2/MMP9/SNAI1/SNAI2/SOX2/RUNX2/TGFB1/MAPK1/MAPK3/GLI2/MIR21/MIR210/CTNNB1/SMAD3/CDK6/DHX36/HIF1A/FASN/PTGS2/EGFR/MIR29B1/MEF2C/NOTCH1/IL6/MIR200C/CTHRC1/COL6A1/CSF1/STC1/SFRP1/MAPK14/MMP14/PTK2/BMP4/SP7/HDAC4/PTCH1/SOX11/WWOX/MIR138-1/ESRRA/TNF/TGFB2/SUFU/WNT5A	48
GO:0018209	peptidyl-serine modification	39/468	252/17913	2.36987e-19	1.1208e-17	4.62532e-18	AKT1/BAX/BCL2/PARP1/CDK1/CDK2/SMAD7/TGFB1/VEGFA/MAPK1/MAPK3/MAPK8/RAF1/GSK3B/CD44/CCNB1/CAV1/PTGS2/HMGA2/NTRK3/EGFR/IL6/MAPK9/PRKAA1/DRD1/PRKCE/MAP2K2/SNCA/MAPK14/AURKA/CALCR/MTOR/TNF/IFNG/LATS1/ATM/PDGFB/WNT5A/MIR132	39
GO:1901214	regulation of neuron death	43/468	313/17913	3.40459e-19	1.59552e-17	6.58438e-18	AKT1/BAX/BCL2/CASP3/CASP9/PARP1/NES/STAT3/SLC7A11/TERT/CLN3/CTNNB1/GSK3B/NUPR1/TP53/IL10/MIR200A/HIF1A/SIRT1/MIR15B/MIR125B1/FOXO3/MEF2C/PDPK1/MIR200C/CSF1/MYBL2/SNCA/MIR124-1/CCL2/MAPT/CASP8/HDAC4/MTOR/MCL1/FBXW7/FAIM2/TNF/CREB1/TGFB2/ATM/WNT5A/ATG7	43
GO:0001501	skeletal system development	53/468	479/17913	4.24213e-19	1.97011e-17	8.13026e-18	TWIST1/MMP2/MMP9/SMAD2/SNAI1/SNAI2/ZEB1/RUNX2/TGFB1/MAPK3/GLI2/SOX4/WDR5/MIR21/FGFR1/KIT/CTNNB1/SMAD3/CD44/TP53/ANXA2/CDKN1C/HOXA5/HIF1A/SETD2/HOXA1/HOXA10/HOXA11/HOXA13/HOXA7/HOXA9/ANKRD11/HMGA2/MEF2C/ADAMTS12/STC1/SFRP1/MAPK14/MMP14/BMP4/HDAC4/SOX11/WWOX/HAS2/NOTCH2/FBXW7/ESRRA/HOXB7/EP300/TGFB2/SUFU/WNT5A/TYMS	53
GO:0010717	regulation of epithelial to mesenchymal transition	25/468	91/17913	4.61434e-19	2.12383e-17	8.76465e-18	TWIST1/PTEN/SMAD2/SNAI1/EZH2/ADIPOR1/SMAD7/TGFB1/MIR21/CTNNB1/SMAD3/FOXA2/MIR149/MIR222/MIR221/MIR29B1/MIR590/NOTCH1/IL6/SFRP1/BMP4/MTOR/SMAD4/ZNF703/TGFB2	25
GO:0007369	gastrulation	33/468	178/17913	5.20942e-19	2.37651e-17	9.80739e-18	MMP2/MMP9/NANOG/SMAD2/SNAI1/SOX2/FGFR1/MIR145/CTNNB1/SMAD3/FOXA2/FOXF1/TP53/IL10/MIR221/FN1/SETD2/LAMB3/HOXA11/HMGA2/MIR150/POU5F1/MIR200C/COL6A1/SFRP1/MMP14/BMP4/SMAD4/AMOT/LAMA3/WNT5A/MIR1-1/ITGB1	33
GO:0048568	embryonic organ development	49/468	413/17913	5.46259e-19	2.47014e-17	1.01938e-17	TWIST1/AKT1/NES/SMAD2/SNAI1/ZEB1/RUNX2/TGFB1/VEGFA/MAPK1/MAPK3/GLI2/FGFR1/KIT/CTNNB1/SMAD3/FOXF1/TP53/IL10/YAP1/CDKN1C/HOXA5/HIF1A/SETD2/HOXA1/HOXA11/HOXA7/EGFR/MEF2C/NOTCH1/CTHRC1/MAP2K1/MMP14/CASP8/BMP4/KDR/KMT2A/PTCH1/SOX11/TNF/HOXB7/TGFB2/BCR/EPAS1/FZD5/PDGFB/SUFU/WNT5A/HES1	49
GO:0051149	positive regulation of muscle cell differentiation	27/468	111/17913	5.59524e-19	2.50813e-17	1.03505e-17	BCL2/MIR199A1/TGFB1/CDH2/MIR204/CDC42/MIR21/MIR424/MIR145/KIT/CTNNB1/MIR34A/SIRT1/MIR125B1/MIR19A/MAML1/MEF2C/MIR19B1/MIR140/MIR206/MAPK14/MIR124-1/MMP14/BMP4/MTOR/RBM4/MIR1-1	27
GO:0007568	aging	43/468	318/17913	6.28142e-19	2.79144e-17	1.15197e-17	TWIST1/AKT1/BCL2/CASP9/PTEN/CDKN1A/CDK1/STAT3/CDKN2B/TGFB1/MAPK1/MAPK3/TERT/MIR21/PDCD4/MIR17/CDK6/CDKN2A/MIR34A/TP53/APAF1/IL10/CDKN1C/SIRT1/MIR217/PTGS2/HMGA2/FOXO3/MIR590/TIMP2/MAP2K1/SNCA/MAPK14/NFE2L2/SERPINE1/MTOR/FOXM1/MIR146A/CREB1/AKT3/ATM/ATG7/TYMS	43
GO:0071902	positive regulation of protein serine/threonine kinase activity	43/468	322/17913	1.01626e-18	4.47763e-17	1.84783e-17	AKT1/CCND1/EZH2/CDK1/CDKN1B/TGFB1/VEGFA/MAPK1/MAPK3/RAF1/C5/FGFR1/BIRC7/KIT/CCNB1/FGF1/ERBB2/SIRT1/HMGA2/NTRK3/EGFR/PIK3CB/DUSP6/ZEB2/CCND2/CXCR4/PRKAA1/LPAR1/ROBO1/MAP2K1/MAP2K2/MAPK10/SNCA/MIR26B/MAPK14/BMP4/DUSP7/TNF/IFNG/CRKL/FZD5/PDGFB/WNT5A	43
GO:0003007	heart morphogenesis	38/468	249/17913	1.14199e-18	4.98896e-17	2.05885e-17	TWIST1/SNAI1/SNAI2/SMAD7/TGFB1/VEGFA/RBM15/SOX4/MIR21/PDCD4/MIR17/MIR20A/CTNNB1/SMAD3/FOXF1/TP53/YAP1/HIF1A/MIR195/MEF2C/NOTCH1/ROBO1/CLDN5/PTK2/MDM2/BMP4/MTOR/SMAD4/PTCH1/SOX11/HAS2/NOTCH2/TGFB2/CRKL/SUFU/WNT5A/MIR1-1/HES1	38
GO:0014910	regulation of smooth muscle cell migration	24/468	85/17913	1.17087e-18	5.07215e-17	2.09318e-17	BCL2/TERT/MIR21/MIR218-1/MIR143/MIR20A/MIR424/MIR34A/MIR135B/MIR137/MIR221/MEF2C/LPAR1/MIR140/MDM2/MIR214/NFE2L2/HDAC4/MIR503/MIR448/SERPINE1/HAS2/MIR182/PDGFB	24
GO:1904738	vascular associated smooth muscle cell migration	19/468	46/17913	1.26889e-18	5.40591e-17	2.23091e-17	TERT/MIR21/MIR218-1/MIR143/MIR20A/MIR424/MIR34A/MIR135B/MIR137/MIR221/MEF2C/MIR140/MDM2/MIR214/NFE2L2/MIR503/MIR448/MIR182/PDGFB	19
GO:1904752	regulation of vascular associated smooth muscle cell migration	19/468	46/17913	1.26889e-18	5.40591e-17	2.23091e-17	TERT/MIR21/MIR218-1/MIR143/MIR20A/MIR424/MIR34A/MIR135B/MIR137/MIR221/MEF2C/MIR140/MDM2/MIR214/NFE2L2/MIR503/MIR448/MIR182/PDGFB	19
GO:0032102	negative regulation of response to external stimulus	44/468	343/17913	1.89202e-18	7.99454e-17	3.29919e-17	MIR205/MIR181A1/PTEN/KRT1/SNAI2/CDKN1A/CDKN1B/CARD8/MIR204/C5/PDCD4/MIR181B1/MIR20A/MIR424/SMAD3/FOXF1/MIR149/MIR34A/MIR222/IL10/MIR221/ANGPT2/RB1/MIR126/MIR195/MIR590/NOTCH1/NFKB1/MIR31/EPPK1/DRD1/ROBO1/MIR124-1/CDH5/CCL2/MIR155/SERPINE1/MIR488/MIR138-1/C1QBP/MIR141/BCR/PDGFB/WNT5A	44
GO:0060537	muscle tissue development	47/468	392/17913	1.95149e-18	8.17882e-17	3.37524e-17	TWIST1/BCL2/PTEN/CDK1/MIR199A1/SMAD7/TGFB1/VEGFA/MAPK1/MIR204/MIR24-1/FGFR1/MIR143/MIR145/CTNNB1/SMAD3/CCNB1/SIK1/NUPR1/MIR222/MIR23A/ATG5/YAP1/MIR200B/RB1/CAV1/MIR23B/MIR19A/MIR195/MAML1/MEF2C/MIR19B1/MIR590/NOTCH1/PRKAA1/MAPK14/BMP4/HDAC4/MTOR/SMAD4/SOX11/CREB1/EP300/TGFB2/WNT5A/MIR1-1/ITGB1	47
GO:0002043	blood vessel endothelial cell proliferation involved in sprouting angiogenesis	20/468	54/17913	2.07981e-18	8.6463e-17	3.56816e-17	VEGFA/MIR24-1/MIR193A/MIR410/MIR424/MIR497/MIR222/MIR23A/MIR126/MIR15B/MIR23B/BMPER/BMP4/MIR155/MIR29C/MIR503/MIR146A/MIR27B/MIR495/MIR132	20
GO:0060562	epithelial tube morphogenesis	42/468	313/17913	2.18937e-18	9.02895e-17	3.72607e-17	TWIST1/BCL2/MYC/TGFB1/VEGFA/RBM15/GLI2/SOX4/MIR21/CTNNB1/SMAD3/FOXF1/APAF1/FGF1/YAP1/HOXA5/HIF1A/SETD2/AR/HOXA11/SDC4/MEF2C/ZEB2/NOTCH1/CXCR4/CTHRC1/ADAMTS12/CSF1/SFRP1/MMP14/BMP4/COL4A1/SMAD4/PTCH1/SOX11/TNF/HOXB7/TGFB2/SUFU/WNT5A/WNT6/HES1	42
GO:0030856	regulation of epithelial cell differentiation	30/468	151/17913	2.83036e-18	1.15798e-16	4.77875e-17	CCND1/MMP9/ZEB1/EZH2/CDKN1B/MIR21/RUNX1/MIR181B1/CTNNB1/GSK3B/MIR34A/YAP1/CDKN1C/CAV1/HOXA7/MIR29B1/MIR150/ZEB2/MIR200C/CLDN5/CDH5/BMP4/SERPINE1/PTCH1/PROM1/TNF/IFNG/MIR1-1/MIR495/HES1	30
GO:1900407	regulation of cellular response to oxidative stress	24/468	88/17913	2.8685e-18	1.16434e-16	4.805e-17	AKT1/PARP1/SLC7A11/MIR21/MIR17/CTNNB1/MIR34A/IL10/MMP3/HIF1A/SIRT1/MIR19A/MIR195/MIR29B1/FOXO3/SFPQ/CD36/NFE2L2/MIR155/MCL1/FBXW7/TNF/MIR132/ATG7	24
GO:0045862	positive regulation of proteolysis	43/468	333/17913	3.67065e-18	1.4783e-16	6.10065e-17	MIR205/AKT1/BAX/CASP9/PTEN/MYC/STAT3/CARD8/SMAD7/MAPK3/MIR21/MIR17/GSK3B/SMAD3/NUPR1/IL33/APAF1/FN1/SIRT1/TNFRSF10B/CAV1/TNFSF10/NOP53/SH3D19/MIR29B1/TNFRSF10A/MAPK9/ROBO1/SNCA/MAPK14/MMP14/PTK2/HMGB1/MAPT/CASP8/MDM2/NFE2L2/AURKA/FBXW7/TNF/IFNG/FAS/NKD2	43
GO:0034614	cellular response to reactive oxygen species	31/468	165/17913	4.19048e-18	1.67457e-16	6.91061e-17	AKT1/MMP2/MMP9/EZH2/KLF2/CDK1/CDK2/MAPK1/MAPK3/MAPK8/MIR21/MIR17/PCNA/FOXO1/MIR107/MIR34A/IL10/MMP3/SIRT1/EGFR/FOXO3/IL6/MAPK9/PRKAA1/PXN/CD36/MAPT/MDM2/NFE2L2/MIR155/TNF	31
GO:1904707	positive regulation of vascular smooth muscle cell proliferation	19/468	49/17913	5.35622e-18	2.12395e-16	8.76512e-17	MMP2/MMP9/TERT/MIR21/MIR130A/MIR17/MIR20A/MIR222/IL10/MIR135B/MIR221/MIR301A/DNMT1/MDM2/MIR214/MIR448/TNF/PDGFB/MIR27B	19
GO:0050769	positive regulation of neurogenesis	50/468	455/17913	6.13993e-18	2.40718e-16	9.93397e-17	BCL2/PTEN/ZEB1/EZH2/KDM1A/TGFB1/VEGFA/GLI2/BDNF/FGFR1/KIT/CTNNB1/FEZF1/E2F1/MIR222/MIR137/MIR221/FN1/ATF1/DHX36/HIF1A/MIR125B1/NTRK3/MEF2C/ZEB2/NOTCH1/TIMP2/IL6/ACTR2/CXCR4/MIR200C/CSF1/LPAR1/ROBO1/MAP2K1/MIR124-1/MIR142/MAPT/BMP4/NFE2L2/MAPK6/MTOR/MIR146A/SOX11/TNF/HSPA5/EP300/CRKL/WNT5A/HES1	50
GO:0001822	kidney development	39/468	276/17913	6.16388e-18	2.40718e-16	9.93397e-17	BAX/BCL2/CASP9/MMP9/MYC/SMAD2/MIR125A/SMAD7/TGFB1/VEGFA/GLI2/SOX4/FGFR1/CTNNB1/SMAD3/APAF1/FGF1/YAP1/CDKN1C/ANGPT2/HOXA11/SDC4/MEF2C/POU3F3/BMPER/CA2/SFRP1/BMP4/SMAD4/PTCH1/NOTCH3/PROM1/SOX11/HAS2/HOXB7/TGFB2/PDGFB/WNT6/HES1	39
GO:1901652	response to peptide	52/468	491/17913	6.35728e-18	2.46404e-16	1.01686e-16	VIM/AKT1/PARP1/PTEN/MMP2/MMP9/KLF2/STAT3/CDKN1B/ADIPOR1/ABCC2/TGFB1/MIR143/MIR145/GSK3B/FOXO1/MIR107/TP53/IGF1R/IL10/MIR200A/MMP3/SIRT1/CAV1/MIR106B/TNFSF10/NUCKS1/PTGS2/SP1/FOXO3/NFKB1/PDPK1/PRKAA1/MIR200C/CA2/MIR140/MAPK14/PTK2/PXN/RAP1B/CD36/MDM2/NFE2L2/CDK4/CALCR/LRP6/MTOR/TSHR/MIR146A/ESRRA/CREB1/PRKAR2A	52
GO:0014909	smooth muscle cell migration	24/468	91/17913	6.76631e-18	2.60301e-16	1.07421e-16	BCL2/TERT/MIR21/MIR218-1/MIR143/MIR20A/MIR424/MIR34A/MIR135B/MIR137/MIR221/MEF2C/LPAR1/MIR140/MDM2/MIR214/NFE2L2/HDAC4/MIR503/MIR448/SERPINE1/HAS2/MIR182/PDGFB	24
GO:0051146	striated muscle cell differentiation	38/468	263/17913	7.71759e-18	2.94698e-16	1.21616e-16	AKT1/BCL2/CASP3/EZH2/CDK1/MIR199A1/TGFB1/VEGFA/CDH2/MIR204/BDNF/MIR24-1/CCNB1/SIK1/YBX1/MIR222/MIR23A/ATG5/MIR200B/RBM38/RB1/MIR23B/MIR19A/MIR195/MAML1/MEF2C/MIR19B1/MIR590/NOTCH1/MIR206/MAPK14/MMP14/BMP4/HDAC4/MTOR/SMAD4/MIR1-1/ITGB1	38
GO:0048638	regulation of developmental growth	42/468	325/17913	8.92835e-18	3.38424e-16	1.39661e-16	AKT1/BCL2/PTEN/CDKN1A/CDK1/STAT3/CDKN1B/MIR199A1/VEGFA/MAPK1/MIR204/BDNF/FGFR1/GSK3B/CCNB1/MIR222/FN1/YAP1/MIR200B/AR/MIR23B/MIR19A/NTRK3/MIR29B1/MEF2C/MIR19B1/MIR590/NOTCH1/CXCR4/EPPK1/CSF1/SFRP1/MAPK14/PTK2/MAPT/BMP4/CDK4/MTOR/PTCH1/CREB1/WNT5A/MIR1-1	42
GO:0050727	regulation of inflammatory response	51/468	479/17913	1.08035e-17	4.06511e-16	1.67759e-16	MIR205/MIR181A1/MMP9/KRT1/ACE2/MIR204/C5/MIR21/PDCD4/MIR181B1/MIR17/MIR20A/SMAD3/FOXF1/NUPR1/IL33/MIR149/MIR222/IL10/MIR221/MMP3/RB1/MIR126/GGT1/PTGS2/EGFR/MIR195/MIR590/IL6/NFKB1/MIR128-1/MIR31/NEAT1/ADAMTS12/MIR206/SNCA/MAPK14/MIR124-1/CDH5/MIR142/MIR155/FABP4/SERPINE1/MIR488/MIR138-1/C1QBP/MIR141/TNF/ATM/BCR/WNT5A	51
GO:1903672	positive regulation of sprouting angiogenesis	21/468	66/17913	1.10646e-17	4.13318e-16	1.70568e-16	MIR125A/VEGFA/MIR23A/IL10/FGF1/MIR126/MIR23B/PTGS2/MIR150/MIR31/PDPK1/BMPER/KDR/MIR155/MIR503/MIR146A/PKM/AKT3/MIR1-1/MIR27B/MIR132	21
GO:0014706	striated muscle tissue development	45/468	376/17913	1.16216e-17	4.31004e-16	1.77867e-16	TWIST1/BCL2/PTEN/CDK1/MIR199A1/SMAD7/TGFB1/VEGFA/MAPK1/MIR204/MIR24-1/FGFR1/CTNNB1/SMAD3/CCNB1/SIK1/NUPR1/MIR222/MIR23A/ATG5/YAP1/MIR200B/RB1/CAV1/MIR23B/MIR19A/MIR195/MAML1/MEF2C/MIR19B1/MIR590/NOTCH1/PRKAA1/MAPK14/BMP4/HDAC4/MTOR/SMAD4/SOX11/CREB1/EP300/TGFB2/WNT5A/MIR1-1/ITGB1	45
GO:0001937	negative regulation of endothelial cell proliferation	22/468	75/17913	1.32106e-17	4.86433e-16	2.00742e-16	MIR21/MIR24-1/MIR193A/MIR410/MIR152/MIR424/MIR497/MIR34A/MIR222/CAV1/MIR126/MIR15B/MEF2C/MIR129-1/CCL2/MIR155/MIR29C/MIR503/MIR146A/TNF/MIR495/MIR132	22
GO:0045844	positive regulation of striated muscle tissue development	23/468	85/17913	1.77776e-17	6.41151e-16	2.64591e-16	BCL2/CDK1/MIR199A1/TGFB1/MAPK1/MIR204/FGFR1/CTNNB1/CCNB1/MIR222/YAP1/MIR23B/MIR19A/MEF2C/MIR19B1/MIR590/NOTCH1/PRKAA1/MAPK14/BMP4/MTOR/CREB1/MIR1-1	23
GO:0048636	positive regulation of muscle organ development	23/468	85/17913	1.77776e-17	6.41151e-16	2.64591e-16	BCL2/CDK1/MIR199A1/TGFB1/MAPK1/MIR204/FGFR1/CTNNB1/CCNB1/MIR222/YAP1/MIR23B/MIR19A/MEF2C/MIR19B1/MIR590/NOTCH1/PRKAA1/MAPK14/BMP4/MTOR/CREB1/MIR1-1	23
GO:0030278	regulation of ossification	33/468	199/17913	1.77856e-17	6.41151e-16	2.64591e-16	TWIST1/BCL2/SNAI2/RUNX2/TGFB1/MAPK1/MAPK3/MIR21/MIR210/CTNNB1/SMAD3/CDK6/HIF1A/MIR29B1/MEF2C/NOTCH1/IL6/MIR200C/CTHRC1/CSF1/SFRP1/MAPK14/PTK2/BMP4/HDAC4/PTCH1/SOX11/MIR138-1/ESRRA/TNF/TGFB2/SUFU/WNT5A	33
GO:0016202	regulation of striated muscle tissue development	29/468	149/17913	1.88743e-17	6.75673e-16	2.78837e-16	TWIST1/BCL2/PTEN/CDK1/MIR199A1/TGFB1/MAPK1/MIR204/FGFR1/CTNNB1/SMAD3/CCNB1/MIR222/YAP1/MIR200B/MIR23B/MIR19A/MEF2C/MIR19B1/MIR590/NOTCH1/PRKAA1/MAPK14/BMP4/HDAC4/MTOR/SMAD4/CREB1/MIR1-1	29
GO:0051150	regulation of smooth muscle cell differentiation	19/468	52/17913	2.01815e-17	7.17486e-16	2.96092e-16	ZEB1/TGFB1/MIR21/PDCD4/MIR424/MIR145/KIT/FOXF1/MIR34A/MIR221/SIRT1/DNMT1/MIR15B/MIR125B1/MIR140/MIR124-1/BMP4/PDGFB/MIR1-1	19
GO:0007569	cell aging	26/468	116/17913	2.2678e-17	8.00718e-16	3.30441e-16	TWIST1/BCL2/PTEN/CDKN1A/CDK1/CDKN2B/TERT/MIR21/PDCD4/MIR17/CDK6/CDKN2A/MIR34A/TP53/SIRT1/MIR217/HMGA2/MIR590/MAP2K1/MAPK14/SERPINE1/MTOR/FOXM1/MIR146A/AKT3/ATM	26
GO:1901863	positive regulation of muscle tissue development	23/468	86/17913	2.3689e-17	8.30726e-16	3.42824e-16	BCL2/CDK1/MIR199A1/TGFB1/MAPK1/MIR204/FGFR1/CTNNB1/CCNB1/MIR222/YAP1/MIR23B/MIR19A/MEF2C/MIR19B1/MIR590/NOTCH1/PRKAA1/MAPK14/BMP4/MTOR/CREB1/MIR1-1	23
GO:0002573	myeloid leukocyte differentiation	33/468	201/17913	2.42887e-17	8.46002e-16	3.49129e-16	PARP1/MMP9/MYC/TGFB1/VEGFA/CDC42/RUNX1/KIT/CTNNB1/CDK6/ANXA2/SIRT1/RB1/FASN/MIR125B1/HOXA7/LTBR/MEF2C/CA2/CSF1/SFRP1/MAPK14/CASP8/BMP4/MTOR/TESC/NOTCH2/FBXW7/ESRRA/TNF/IFNG/CUL4A/CREB1	33
GO:0051098	regulation of binding	44/468	368/17913	2.83022e-17	9.7816e-16	4.03668e-16	TWIST1/AKT1/BAX/BCL2/PARP1/MMP9/NES/SMAD2/KDM1A/TGFB1/MAPK3/MAPK8/TERT/BDNF/ZBTB7A/CTNNB1/GSK3B/SMAD3/E2F1/ANXA2/IL10/RB1/MIR148A/CAV1/NUCKS1/HMGA2/MEF2C/CTHRC1/HMGB1/CD36/BMP4/HDAC4/AURKA/CDT1/SMAD4/SOX11/FBXW7/IFNG/HSPA5/EP300/PDGFB/WNT5A/MIR27B/HES1	44
GO:0001704	formation of primary germ layer	26/468	117/17913	2.84625e-17	9.7816e-16	4.03668e-16	MMP2/MMP9/NANOG/SMAD2/SNAI1/SOX2/FGFR1/MIR145/CTNNB1/SMAD3/FOXF1/FN1/SETD2/LAMB3/HOXA11/HMGA2/MIR150/POU5F1/MIR200C/COL6A1/MMP14/BMP4/LAMA3/WNT5A/MIR1-1/ITGB1	26
GO:0070371	ERK1 and ERK2 cascade	39/468	289/17913	3.10645e-17	1.06051e-15	4.37654e-16	PTEN/MYC/TGFB1/MAPK1/MAPK3/MIR21/MIR24-1/SPRY4/MIR424/MIR145/TIMP3/CD44/MIR222/MIR23A/MIR221/FN1/ERBB2/MIR126/MIR23B/EGFR/DUSP6/NOTCH1/BMPER/MAP2K1/MAP2K2/HMGB1/RAP1B/CD36/BMP4/KDR/MIR503/CALCR/SMAD4/NOTCH2/FBXW7/TNF/CRKL/PDGFB/MIR27B	39
GO:1901861	regulation of muscle tissue development	29/468	152/17913	3.32928e-17	1.12911e-15	4.65961e-16	TWIST1/BCL2/PTEN/CDK1/MIR199A1/TGFB1/MAPK1/MIR204/FGFR1/CTNNB1/SMAD3/CCNB1/MIR222/YAP1/MIR200B/MIR23B/MIR19A/MEF2C/MIR19B1/MIR590/NOTCH1/PRKAA1/MAPK14/BMP4/HDAC4/MTOR/SMAD4/CREB1/MIR1-1	29
GO:1902882	regulation of response to oxidative stress	24/468	97/17913	3.39825e-17	1.14497e-15	4.72506e-16	AKT1/PARP1/SLC7A11/MIR21/MIR17/CTNNB1/MIR34A/IL10/MMP3/HIF1A/SIRT1/MIR19A/MIR195/MIR29B1/FOXO3/SFPQ/CD36/NFE2L2/MIR155/MCL1/FBXW7/TNF/MIR132/ATG7	24
GO:0062012	regulation of small molecule metabolic process	48/468	439/17913	3.61551e-17	1.21026e-15	4.99449e-16	TWIST1/AKT1/PARP1/SNAI1/SNAI2/CDK1/STAT3/ADIPOR1/TGFB1/SLC7A11/MIR204/WDR5/MIR21/MIR33A/ZBTB7A/KIT/MIR210/GSK3B/TFF3/FOXO1/FOXA2/CCNB1/SIK1/MIR107/NUPR1/TP53/FGF1/HIF1A/SIRT1/CAV1/FASN/PTGS2/SP1/NFKB1/PRKAA1/PRKCE/SNCA/MIR183/HDAC4/MTOR/HAS2/MIR182/TNF/IFNG/EP300/PDGFB/MIR96/MIR132	48
GO:0048634	regulation of muscle organ development	29/468	153/17913	4.01014e-17	1.33369e-15	5.50389e-16	TWIST1/BCL2/PTEN/CDK1/MIR199A1/TGFB1/MAPK1/MIR204/FGFR1/CTNNB1/SMAD3/CCNB1/MIR222/YAP1/MIR200B/MIR23B/MIR19A/MEF2C/MIR19B1/MIR590/NOTCH1/PRKAA1/MAPK14/BMP4/HDAC4/MTOR/SMAD4/CREB1/MIR1-1	29
GO:0003300	cardiac muscle hypertrophy	25/468	108/17913	4.1387e-17	1.36763e-15	5.64393e-16	PARP1/EZH2/MIR199A1/MIR21/MIR24-1/MIR17/MIR20A/MIR145/SMAD3/FOXO1/MIR23A/MIR15B/MIR23B/MIR19A/MIR195/MEF2C/MIR19B1/NOTCH1/PTK2/MIR214/HDAC4/MIR155/MTOR/SMAD4/MIR1-1	25
GO:0007178	transmembrane receptor protein serine/threonine kinase signaling pathway	41/468	323/17913	4.27312e-17	1.40305e-15	5.79013e-16	VIM/PARP1/SMAD2/ZEB1/RUNX2/CDKN2B/SMAD7/TGFB1/MAPK3/MIR21/PDCD4/MIR20A/ZBTB7A/SMAD3/TP53/CDKN1C/SIRT1/CAV1/MIR15B/MIR29B1/NOTCH1/PDPK1/BMPER/SFRP1/CLDN5/MIR140/MAPK14/CDH5/PTK2/PXN/BMP4/MIR183/SMAD4/SOX11/ZNF703/HSPA5/CREB1/EP300/TGFB2/WNT5A/HES1	41
GO:0071216	cellular response to biotic stimulus	33/468	206/17913	5.20515e-17	1.69826e-15	7.0084e-16	VIM/AKT1/CARD8/ABCC2/TGFB1/MAPK1/MAPK3/MAPK8/MIR21/PDCD4/MIR17/MIR20A/GSK3B/TP53/APAF1/IL10/MEF2C/IL6/NFKB1/ABCA1/PRKCE/MAPK14/HMGB1/CCL2/CD36/CDK4/SERPINE1/MIR146A/TNF/HSPA5/BCR/FZD5/WNT5A	33
GO:0048738	cardiac muscle tissue development	34/468	221/17913	6.21078e-17	2.01362e-15	8.30983e-16	PTEN/CDK1/MIR199A1/SMAD7/TGFB1/VEGFA/MAPK1/MIR204/MIR24-1/FGFR1/CCNB1/SIK1/MIR222/MIR23A/ATG5/YAP1/MIR200B/MIR23B/MIR19A/MIR195/MAML1/MEF2C/MIR19B1/MIR590/NOTCH1/MAPK14/BMP4/MTOR/SMAD4/CREB1/TGFB2/WNT5A/MIR1-1/ITGB1	34
GO:0055025	positive regulation of cardiac muscle tissue development	20/468	63/17913	7.02497e-17	2.26336e-15	9.34043e-16	CDK1/MIR199A1/TGFB1/MAPK1/MIR204/FGFR1/CCNB1/MIR222/YAP1/MIR23B/MIR19A/MEF2C/MIR19B1/MIR590/NOTCH1/MAPK14/BMP4/MTOR/CREB1/MIR1-1	20
GO:1903587	regulation of blood vessel endothelial cell proliferation involved in sprouting angiogenesis	18/468	48/17913	8.26341e-17	2.64583e-15	1.09188e-15	VEGFA/MIR24-1/MIR193A/MIR410/MIR424/MIR497/MIR222/MIR23A/MIR126/MIR15B/MIR23B/MIR155/MIR29C/MIR503/MIR146A/MIR27B/MIR495/MIR132	18
GO:0014897	striated muscle hypertrophy	25/468	111/17913	8.3439e-17	2.65511e-15	1.09571e-15	PARP1/EZH2/MIR199A1/MIR21/MIR24-1/MIR17/MIR20A/MIR145/SMAD3/FOXO1/MIR23A/MIR15B/MIR23B/MIR19A/MIR195/MEF2C/MIR19B1/NOTCH1/PTK2/MIR214/HDAC4/MIR155/MTOR/SMAD4/MIR1-1	25
GO:0048771	tissue remodeling	30/468	170/17913	9.0616e-17	2.8658e-15	1.18266e-15	BAX/MIR199A1/TGFB1/MIR143/MIR17/MIR20A/CTNNB1/MIR34A/TP53/ATG5/HIF1A/CAV1/MIR15B/EGFR/MIR195/MIR29B1/MEF2C/IL6/CTHRC1/CA2/SFRP1/MMP14/HMGB1/MDM2/RAC2/MIR214/MIR155/NOTCH2/BCR/EPAS1	30
GO:2000379	positive regulation of reactive oxygen species metabolic process	24/468	101/17913	9.30919e-17	2.92615e-15	1.20757e-15	AKT1/KLF2/CDKN1A/ACE2/TGFB1/MIR24-1/MIR181B1/SMAD3/TP53/NNT/PTGS2/EGFR/FOXO3/SNCA/MAPK14/CD36/MAPT/NFE2L2/HDAC4/MIR155/MTOR/TNF/IFNG/PDGFB	24
GO:1903706	regulation of hemopoiesis	49/468	468/17913	9.7681e-17	3.03722e-15	1.2534e-15	MYC/ZEB1/STAT3/SMAD7/TGFB1/RBM15/GLI2/WDR5/MIR21/RUNX1/CTNNB1/CDK6/MIR222/MIR221/YAP1/DHX36/HOXA5/ERBB2/HIF1A/RB1/RUNX3/MIR125B1/HOXA7/HOXA9/FOXO3/MEF2C/NOTCH1/CA2/CSF1/SFRP1/MAPK14/MMP14/HMGB1/CASP8/BMP4/NFE2L2/MIR155/KMT2A/MTOR/TESC/NOTCH2/FBXW7/ESRRA/TNF/IFNG/CUL4A/CREB1/EP300/HES1	49
GO:0043491	protein kinase B signaling	37/468	268/17913	9.78037e-17	3.03722e-15	1.2534e-15	AKT1/PTEN/MIR199A1/TGFB1/MIR21/FGFR1/MIR143/MIR20A/MIR145/KIT/MIR34A/MIR222/MIR137/MIR221/FGF1/ERBB2/SIRT1/MIR126/NOP53/EGFR/PIK3CB/MIR29B1/MIR375/PTK2/CCL2/RAC2/KDR/MIR29A/MIR29C/CALCR/MTOR/MIR138-1/C1QBP/TNF/PDGFB/MIR132/ITGB1	37
GO:0052547	regulation of peptidase activity	45/468	398/17913	1.04227e-16	3.21141e-15	1.32529e-15	MIR205/AKT1/BAX/CASP9/MMP9/MYC/SOX2/BIRC5/STAT3/CARD8/VEGFA/MAPK3/RAF1/BST2/C5/MIR21/MIR24-1/MIR152/MIR17/TIMP3/SMAD3/CD44/APAF1/FN1/SIRT1/TNFRSF10B/CAV1/TNFSF10/PTGS2/MIR195/MIR29B1/MIR19B1/TIMP2/TNFRSF10A/ROBO1/SNCA/MAPK14/HMGB1/MAPT/CASP8/MDM2/MIR29C/SERPINE1/TNF/FAS	45
GO:0071559	response to transforming growth factor beta	35/468	239/17913	1.04659e-16	3.21141e-15	1.32529e-15	PARP1/SMAD2/ZEB1/CDKN2B/SMAD7/TGFB1/MIR21/ZBTB7A/SMAD3/TP53/APAF1/CDKN1C/SIRT1/CAV1/MIR15B/RUNX3/MIR29B1/MEF2C/PDPK1/SFRP1/CLDN5/CDH5/PTK2/PXN/MIR183/SMAD4/SOX11/WWOX/ZNF703/HSPA5/CREB1/EP300/TGFB2/CRKL/WNT5A	35
GO:0002683	negative regulation of immune system process	48/468	451/17913	1.06857e-16	3.25947e-15	1.34512e-15	AKT1/CASP3/MYC/SMAD7/TGFB1/RBM15/BST2/C5/MIR21/MIR24-1/RUNX1/MIR181B1/MIR17/CTNNB1/CDK6/FOXF1/IL33/MIR34A/MIR222/IL10/MIR221/HOXA5/ERBB2/RUNX3/MIR125B1/HOXA7/HOXA9/MIR19A/SDC4/NOTCH1/PDPK1/SFRP1/MIR124-1/HMGB1/CCL2/BMP4/NFE2L2/MIR155/SOX11/C1QBP/WASL/FBXW7/TNF/CUL4A/TGFB2/ATM/BCR/HES1	48
GO:0014896	muscle hypertrophy	25/468	113/17913	1.31433e-16	3.9855e-15	1.64474e-15	PARP1/EZH2/MIR199A1/MIR21/MIR24-1/MIR17/MIR20A/MIR145/SMAD3/FOXO1/MIR23A/MIR15B/MIR23B/MIR19A/MIR195/MEF2C/MIR19B1/NOTCH1/PTK2/MIR214/HDAC4/MIR155/MTOR/SMAD4/MIR1-1	25
GO:0051896	regulation of protein kinase B signaling	35/468	241/17913	1.3663e-16	4.11887e-15	1.69978e-15	AKT1/PTEN/MIR199A1/TGFB1/MIR21/FGFR1/MIR143/MIR20A/MIR145/KIT/MIR34A/MIR222/MIR137/MIR221/FGF1/ERBB2/SIRT1/MIR126/NOP53/EGFR/PIK3CB/MIR29B1/MIR375/PTK2/RAC2/MIR29A/MIR29C/CALCR/MTOR/MIR138-1/C1QBP/TNF/PDGFB/MIR132/ITGB1	35
GO:0014812	muscle cell migration	24/468	103/17913	1.51238e-16	4.53276e-15	1.87058e-15	BCL2/TERT/MIR21/MIR218-1/MIR143/MIR20A/MIR424/MIR34A/MIR135B/MIR137/MIR221/MEF2C/LPAR1/MIR140/MDM2/MIR214/NFE2L2/HDAC4/MIR503/MIR448/SERPINE1/HAS2/MIR182/PDGFB	24
GO:1901216	positive regulation of neuron death	23/468	93/17913	1.58102e-16	4.71108e-15	1.94417e-15	BAX/CASP3/CASP9/PARP1/CTNNB1/GSK3B/NUPR1/TP53/MIR200A/MIR125B1/FOXO3/MYBL2/SNCA/MAPT/CASP8/HDAC4/MTOR/MCL1/FBXW7/TNF/TGFB2/ATM/WNT5A	23
GO:0034329	cell junction assembly	33/468	214/17913	1.68062e-16	4.97907e-15	2.05477e-15	BCL2/PTEN/SNAI1/SNAI2/ACE2/SMAD7/VEGFA/CDC42/RUNX1/LAMC2/CTNNB1/SMAD3/FN1/LAMB3/TJP1/CAV1/SDC4/EPB41L3/PDPK1/SFRP1/CLDN5/OCLN/CDH5/MMP14/PTK2/RAP1B/KDR/MIR155/FSCN1/ZNF703/TNF/FZD5/LAMA3	33
GO:0051153	regulation of striated muscle cell differentiation	25/468	115/17913	2.04981e-16	6.03814e-15	2.49182e-15	BCL2/EZH2/MIR199A1/TGFB1/MIR204/BDNF/SIK1/YBX1/MIR222/MIR200B/RBM38/MIR19A/MAML1/MEF2C/MIR19B1/MIR590/NOTCH1/MIR206/MAPK14/MMP14/BMP4/HDAC4/MTOR/SMAD4/MIR1-1	25
GO:1903201	regulation of oxidative stress-induced cell death	21/468	75/17913	2.10293e-16	6.15942e-15	2.54187e-15	AKT1/PARP1/SLC7A11/MIR21/MIR17/CTNNB1/MIR34A/IL10/MMP3/HIF1A/SIRT1/MIR19A/MIR195/MIR29B1/FOXO3/SFPQ/NFE2L2/MIR155/MCL1/FBXW7/ATG7	21
GO:0034330	cell junction organization	37/468	277/17913	2.92443e-16	8.51718e-15	3.51488e-15	BCL2/PTEN/SNAI1/SNAI2/CDH1/ACE2/SMAD7/TGFB1/VEGFA/CDH2/CDC42/RUNX1/LAMC2/CTNNB1/SMAD3/FN1/LAMB3/TJP1/CAV1/SDC4/EPB41L3/PDPK1/SFRP1/CLDN5/OCLN/CDH5/MMP14/PTK2/RAP1B/KDR/MIR155/FSCN1/ZNF703/TNF/TGFB2/FZD5/LAMA3	37
GO:0071560	cellular response to transforming growth factor beta stimulus	34/468	233/17913	3.24973e-16	9.41145e-15	3.88392e-15	PARP1/SMAD2/ZEB1/CDKN2B/SMAD7/TGFB1/MIR21/ZBTB7A/SMAD3/TP53/APAF1/CDKN1C/SIRT1/CAV1/MIR15B/MIR29B1/MEF2C/PDPK1/SFRP1/CLDN5/CDH5/PTK2/PXN/MIR183/SMAD4/SOX11/WWOX/ZNF703/HSPA5/CREB1/EP300/TGFB2/CRKL/WNT5A	34
GO:1901989	positive regulation of cell cycle phase transition	23/468	97/17913	4.32266e-16	1.24488e-14	5.13737e-15	PAGR1/AKT1/CCND1/EZH2/CDK1/TGFB1/TERT/CCNE1/CCNB1/MIR222/MIR221/RB1/MIR372/EGFR/MIR590/CCND2/MDM2/MIR214/MIR29A/CDT1/CDK4/CUL4A/MIR495	23
GO:0010659	cardiac muscle cell apoptotic process	19/468	60/17913	4.456e-16	1.27615e-14	5.26642e-15	PTEN/MIR199A1/MIR21/MIR24-1/MIR17/MIR20A/MIR145/NUPR1/MIR34A/TP53/APAF1/MIR106B/MIR19A/MIR195/MIR19B1/MIR590/PDPK1/MIR320A/NFE2L2	19
GO:0042770	signal transduction in response to DNA damage	26/468	131/17913	5.4171e-16	1.54283e-14	6.36695e-15	TWIST1/BAX/CASP9/SNAI1/SNAI2/KDM1A/CDKN1A/CDK1/CDK2/CDKN1B/SOX4/MIR21/PCNA/CD44/CCNB1/E2F1/TP53/SIRT1/FOXO3/MAPK14/MDM2/AURKA/FOXM1/CDC25C/EP300/ATM	26
GO:0045165	cell fate commitment	34/468	238/17913	6.27356e-16	1.77693e-14	7.33306e-15	BCL2/CASP3/NANOG/SMAD2/SOX2/STAT3/RUNX2/GLI2/FGFR1/CTNNB1/FOXA2/TP53/AR/HOXA11/NTRK3/MEF2C/MIR19B1/POU5F1/IL6/SFRP1/MIR206/BMP4/MTOR/SMAD4/PTCH1/MCL1/NOTCH3/NOTCH2/LATS1/EPAS1/SUFU/MIR1-1/HES1/ITGB1	34
GO:1905563	negative regulation of vascular endothelial cell proliferation	14/468	27/17913	8.3772e-16	2.35981e-14	9.73846e-15	MIR24-1/MIR193A/MIR152/MIR424/MIR34A/MIR126/MIR15B/MEF2C/MIR129-1/CCL2/MIR29C/MIR503/MIR495/MIR132	14
GO:0010658	striated muscle cell apoptotic process	19/468	62/17913	8.89207e-16	2.49075e-14	1.02789e-14	PTEN/MIR199A1/MIR21/MIR24-1/MIR17/MIR20A/MIR145/NUPR1/MIR34A/TP53/APAF1/MIR106B/MIR19A/MIR195/MIR19B1/MIR590/PDPK1/MIR320A/NFE2L2	19
GO:0070372	regulation of ERK1 and ERK2 cascade	36/468	271/17913	8.93868e-16	2.49075e-14	1.02789e-14	PTEN/TGFB1/MAPK3/MIR21/MIR24-1/SPRY4/MIR424/MIR145/TIMP3/CD44/MIR222/MIR23A/MIR221/FN1/ERBB2/MIR126/MIR23B/EGFR/DUSP6/NOTCH1/BMPER/MAP2K1/HMGB1/RAP1B/CD36/BMP4/KDR/MIR503/CALCR/SMAD4/NOTCH2/FBXW7/TNF/CRKL/PDGFB/MIR27B	36
GO:1904019	epithelial cell apoptotic process	24/468	111/17913	9.42091e-16	2.61101e-14	1.07751e-14	MIR125A/TERT/MIR24-1/PDCD4/NUPR1/E2F1/IL10/RB1/MIR126/FOXO3/MIR590/IL6/PDPK1/MIR375/CCL2/KDR/NFE2L2/SERPINE1/MTOR/ANGPTL4/MIR182/TNF/MIR495/MIR132	24
GO:0055024	regulation of cardiac muscle tissue development	23/468	101/17913	1.12341e-15	3.09687e-14	1.27802e-14	PTEN/CDK1/MIR199A1/TGFB1/MAPK1/MIR204/FGFR1/CCNB1/MIR222/YAP1/MIR200B/MIR23B/MIR19A/MEF2C/MIR19B1/MIR590/NOTCH1/MAPK14/BMP4/MTOR/SMAD4/CREB1/MIR1-1	23
GO:0000302	response to reactive oxygen species	33/468	230/17913	1.49471e-15	4.09854e-14	1.69139e-14	AKT1/BCL2/CASP3/MMP2/MMP9/EZH2/KLF2/CDK1/CDK2/MAPK1/MAPK3/MAPK8/MIR21/MIR17/PCNA/FOXO1/MIR107/MIR34A/IL10/MMP3/SIRT1/EGFR/FOXO3/IL6/MAPK9/PRKAA1/PXN/CD36/MAPT/MDM2/NFE2L2/MIR155/TNF	33
GO:1901992	positive regulation of mitotic cell cycle phase transition	21/468	82/17913	1.54767e-15	4.22128e-14	1.74204e-14	AKT1/CCND1/CDK1/TGFB1/TERT/CCNE1/CCNB1/MIR222/MIR221/RB1/MIR372/EGFR/MIR590/CCND2/MDM2/MIR214/MIR29A/CDT1/CDK4/CUL4A/MIR495	21
GO:0036473	cell death in response to oxidative stress	22/468	92/17913	1.56808e-15	4.25446e-14	1.75573e-14	AKT1/BCL2/PARP1/SLC7A11/MIR21/MIR17/CTNNB1/MIR34A/IL10/MMP3/HIF1A/SIRT1/MIR19A/MIR195/MIR29B1/FOXO3/SFPQ/NFE2L2/MIR155/MCL1/FBXW7/ATG7	22
GO:1904706	negative regulation of vascular smooth muscle cell proliferation	16/468	41/17913	2.06832e-15	5.58229e-14	2.3037e-14	PTEN/CDKN1A/CDKN1B/PDCD4/MIR424/MIR34A/IL10/MIR137/MEF2C/MIR140/MIR124-1/MIR214/MIR503/MIR182/MIR1-1/MIR96	16
GO:0061138	morphogenesis of a branching epithelium	29/468	178/17913	2.69818e-15	7.24432e-14	2.98959e-14	BCL2/MYC/SNAI2/TGFB1/VEGFA/RBM15/GLI2/FGFR1/HOXB13/CTNNB1/FOXF1/IL10/FGF1/YAP1/HOXA5/AR/HOXA11/CSF1/SFRP1/MMP14/BMP4/COL4A1/SMAD4/PTCH1/TNF/HOXB7/FZD5/WNT5A/WNT6	29
GO:0010665	regulation of cardiac muscle cell apoptotic process	18/468	57/17913	2.82412e-15	7.53789e-14	3.11074e-14	PTEN/MIR199A1/MIR21/MIR24-1/MIR17/MIR20A/MIR145/NUPR1/MIR34A/TP53/MIR106B/MIR19A/MIR195/MIR19B1/MIR590/PDPK1/MIR320A/NFE2L2	18
GO:0045637	regulation of myeloid cell differentiation	34/468	250/17913	2.83676e-15	7.53789e-14	3.11074e-14	MYC/STAT3/TGFB1/RBM15/WDR5/RUNX1/CTNNB1/CDK6/MIR222/MIR221/HOXA5/HIF1A/RB1/MIR125B1/HOXA7/HOXA9/FOXO3/MEF2C/CA2/CSF1/SFRP1/MAPK14/CASP8/KMT2A/MTOR/TESC/NOTCH2/FBXW7/ESRRA/TNF/IFNG/CUL4A/CREB1/EP300	34
GO:0001763	morphogenesis of a branching structure	30/468	192/17913	2.85677e-15	7.55213e-14	3.11662e-14	BCL2/MYC/SNAI2/TGFB1/VEGFA/RBM15/GLI2/FGFR1/HOXB13/CTNNB1/FOXF1/IL10/FGF1/YAP1/HOXA5/SETD2/AR/HOXA11/CSF1/SFRP1/MMP14/BMP4/COL4A1/SMAD4/PTCH1/TNF/HOXB7/FZD5/WNT5A/WNT6	30
GO:0001101	response to acid chemical	39/468	330/17913	2.91389e-15	7.66384e-14	3.16272e-14	AKT1/CASP3/MMP2/ZEB1/KLF2/IGF2R/CDKN1B/ABCC2/VEGFA/PCNA/FOXO1/CCNB1/E2F1/YAP1/DNMT1/PTGS2/NTRK3/EGFR/PRKAA1/ABCA1/COL6A1/PRKCE/MAPK10/SFRP1/CD36/KDR/CDK4/COL4A1/MTOR/PTCH1/TESC/TNF/CREB1/ATM/PDGFB/WNT5A/WNT6/ATG7/TYMS	39
GO:0035265	organ growth	29/468	179/17913	3.14315e-15	8.22485e-14	3.39424e-14	AKT1/BCL2/PTEN/SMAD2/CDK1/MIR199A1/MAPK1/MIR204/MIR24-1/FGFR1/CCNB1/MIR222/MIR23A/YAP1/MIR200B/AR/MIR23B/MIR19A/MIR195/MEF2C/MIR19B1/MIR590/NOTCH1/STC1/MAPK14/PTK2/MTOR/TGFB2/MIR1-1	29
GO:0035886	vascular smooth muscle cell differentiation	16/468	42/17913	3.26178e-15	8.49215e-14	3.50454e-14	VEGFA/MIR21/PDCD4/MIR424/MIR145/KIT/MIR221/DNMT1/MIR15B/MIR125B1/NOTCH1/MIR140/MIR124-1/PDGFB/MIR1-1/HES1	16
GO:0030330	DNA damage response, signal transduction by p53 class mediator	23/468	106/17913	3.47525e-15	8.95746e-14	3.69657e-14	TWIST1/BAX/SNAI1/SNAI2/KDM1A/CDKN1A/CDK1/CDK2/CDKN1B/SOX4/PCNA/CD44/CCNB1/E2F1/TP53/SIRT1/FOXO3/MDM2/AURKA/FOXM1/CDC25C/EP300/ATM	23
GO:0055017	cardiac muscle tissue growth	23/468	106/17913	3.47525e-15	8.95746e-14	3.69657e-14	PTEN/CDK1/MIR199A1/MAPK1/MIR204/MIR24-1/FGFR1/CCNB1/MIR222/MIR23A/YAP1/MIR200B/MIR23B/MIR19A/MIR195/MEF2C/MIR19B1/MIR590/NOTCH1/MAPK14/MTOR/TGFB2/MIR1-1	23
GO:0001649	osteoblast differentiation	32/468	222/17913	3.55457e-15	9.11632e-14	3.76213e-14	TWIST1/AKT1/SNAI1/SNAI2/SOX2/RUNX2/GLI2/MIR21/MIR210/CTNNB1/SMAD3/CDK6/FASN/MIR29B1/MEF2C/NOTCH1/IL6/MIR200C/CTHRC1/COL6A1/SFRP1/PTK2/BMP4/SP7/HDAC4/PTCH1/SOX11/WWOX/MIR138-1/ESRRA/TNF/SUFU	32
GO:0031099	regeneration	30/468	194/17913	3.81312e-15	9.73101e-14	4.0158e-14	BCL2/PTEN/CCND1/SOX2/EZH2/CDKN1A/IGF2R/CDK1/CDKN1B/MIR199A1/TGFB1/PCNA/CCNB1/MIR222/IL10/MIR221/YAP1/ANGPT2/NTRK3/EGFR/MIR29B1/MIR590/EPPK1/NNMT/MAP2K1/AURKA/CDK4/PTCH1/PKM/TYMS	30
GO:0010718	positive regulation of epithelial to mesenchymal transition	17/468	50/17913	4.11267e-15	1.04438e-13	4.30993e-14	TWIST1/SMAD2/SNAI1/EZH2/TGFB1/MIR21/CTNNB1/SMAD3/MIR222/MIR221/NOTCH1/IL6/BMP4/MTOR/SMAD4/ZNF703/TGFB2	17
GO:1905564	positive regulation of vascular endothelial cell proliferation	13/468	24/17913	4.30591e-15	1.08809e-13	4.49032e-14	STAT3/MIR21/FGFR1/MIR130A/MIR135B/MIR126/SP1/PDPK1/HMGB1/MIR29A/AKT3/MIR495/MIR132	13
GO:0010038	response to metal ion	39/468	335/17913	4.81932e-15	1.21188e-13	5.0012e-14	AKT1/BCL2/CASP3/CASP9/PARP1/PTEN/CCND1/MMP9/CDH1/CDK1/CDKN1B/ABCC2/MAPK1/MAPK3/MAPK8/TERT/PCNA/KIT/CCNB1/ATF1/HIF1A/CAV1/PTGS2/EGFR/MEF2C/MAPK9/PRKAA1/CA2/SNCA/MAPT/CASP8/MDM2/NFE2L2/FABP4/CDK4/FUS/HSPA5/CREB1/WNT5A	39
GO:0048511	rhythmic process	36/468	287/17913	5.53351e-15	1.38472e-13	5.71447e-14	TWIST1/CASP3/PTEN/EZH2/CDK1/MAPK8/SUV39H1/PCNA/GSK3B/SIK1/TP53/SIRT1/NTRK3/EGFR/SP1/FOXO3/SFPQ/MAPK9/PRKAA1/PSPC1/MAPK10/CCAR2/KMT2A/CDK4/SERPINE1/MTOR/HAS2/FBXW7/HSPA5/RBM4/CUL4A/CREB1/EP300/TGFB2/ATG7/TYMS	36
GO:0010662	regulation of striated muscle cell apoptotic process	18/468	59/17913	5.61553e-15	1.39846e-13	5.77116e-14	PTEN/MIR199A1/MIR21/MIR24-1/MIR17/MIR20A/MIR145/NUPR1/MIR34A/TP53/MIR106B/MIR19A/MIR195/MIR19B1/MIR590/PDPK1/MIR320A/NFE2L2	18
GO:0009636	response to toxic substance	48/468	499/17913	5.68166e-15	1.40812e-13	5.81105e-14	BAX/BCL2/CASP3/PTEN/CCND1/EZH2/KDM1A/KLF2/CDH1/CDKN1A/CDK1/STAT3/ABCC2/SLC7A11/MAPK1/MAPK3/MIR21/MIR17/PCNA/ABCG2/FOXO1/CCNB1/MIR107/NUPR1/MIR34A/IL10/SIRT1/NNT/PTGS2/NTRK3/FOXO3/IL6/NFKB1/ACTR2/PRKAA1/DRD1/PRKCE/CD36/CASP8/MDM2/KDR/NFE2L2/MIR155/CDK4/TNF/CREB1/PDGFB/TYMS	48
GO:0071219	cellular response to molecule of bacterial origin	29/468	183/17913	5.72715e-15	1.41261e-13	5.82955e-14	VIM/AKT1/CARD8/ABCC2/TGFB1/MAPK1/MAPK3/MAPK8/MIR21/PDCD4/MIR17/MIR20A/IL10/MEF2C/IL6/NFKB1/ABCA1/PRKCE/MAPK14/HMGB1/CCL2/CD36/CDK4/SERPINE1/MIR146A/TNF/BCR/FZD5/WNT5A	29
GO:0043405	regulation of MAP kinase activity	38/468	322/17913	7.03706e-15	1.72743e-13	7.12877e-14	EZH2/CDK1/TGFB1/VEGFA/MAPK1/MAPK3/RAF1/C5/FGFR1/PDCD4/MIR218-1/BIRC7/KIT/IGF1R/FGF1/ERBB2/CAV1/NTRK3/EGFR/PIK3CB/DUSP6/ZEB2/CXCR4/PRKAA1/LPAR1/ROBO1/MAP2K1/MAP2K2/MAPK10/SFRP1/MAPK14/BMP4/DUSP7/TNF/CRKL/FZD5/PDGFB/WNT5A	38
GO:1904035	regulation of epithelial cell apoptotic process	21/468	88/17913	7.2714e-15	1.7765e-13	7.33126e-14	MIR125A/TERT/MIR24-1/PDCD4/NUPR1/MIR126/FOXO3/MIR590/IL6/PDPK1/MIR375/CCL2/KDR/NFE2L2/SERPINE1/MTOR/ANGPTL4/MIR182/TNF/MIR495/MIR132	21
GO:0055007	cardiac muscle cell differentiation	24/468	121/17913	7.44513e-15	1.81036e-13	7.471e-14	CDK1/MIR199A1/TGFB1/VEGFA/MIR204/MIR24-1/CCNB1/SIK1/MIR222/MIR23A/ATG5/MIR200B/MIR23B/MIR19A/MIR195/MAML1/MEF2C/MIR19B1/MIR590/BMP4/MTOR/SMAD4/MIR1-1/ITGB1	24
GO:0048662	negative regulation of smooth muscle cell proliferation	19/468	69/17913	8.11295e-15	1.96349e-13	8.10293e-14	PTEN/CDKN1A/CDKN1B/PDCD4/MIR143/MIR424/MIR145/MIR34A/IL10/MIR137/MEF2C/MIR140/MIR124-1/MIR214/MIR503/MIR182/IFNG/MIR1-1/MIR96	19
GO:0048545	response to steroid hormone	41/468	375/17913	8.22827e-15	1.98209e-13	8.1797e-14	PAGR1/BCL2/CASP3/CASP9/PARP1/CCND1/CDKN1A/ABCC2/TGFB1/RUNX1/ZBTB7A/PCNA/CTNNB1/FOXO1/CCNE1/EIF4E/IL10/YAP1/AR/SIRT1/RB1/CAV1/PTGS2/NTRK3/EGFR/FOXO3/IL6/CA2/HNF4G/STC1/SFRP1/MDM2/BMP4/CALCR/ESRRA/TNF/IDH1/LATS1/EP300/TGFB2/TYMS	41
GO:0051090	regulation of DNA-binding transcription factor activity	44/468	429/17913	8.37731e-15	2.00861e-13	8.28913e-14	TWIST1/AKT1/PTEN/EZH2/KDM1A/STAT3/CARD8/SMAD7/TGFB1/VEGFA/MAPK1/MAPK3/MAPK8/ZBTB7A/KIT/CTNNB1/SMAD3/CDKN2A/FOXA2/SIK1/NUPR1/IL10/AR/SIRT1/RB1/CAV1/SGK1/MIR19B1/IL6/NFKB1/MAPK9/MAPK10/MAPK14/CD36/HDAC4/MIR155/LRP6/PTCH1/MIR138-1/TNF/EP300/SUFU/WNT5A/MIR1-1	44
GO:0035270	endocrine system development	24/468	122/17913	9.04735e-15	2.15922e-13	8.91067e-14	AKT1/SMAD2/SOX2/CDH1/MAPK1/MAPK3/RAF1/GLI2/SOX4/GSK3B/SMAD3/FOXO1/CDK6/FOXA2/CDKN1C/HOXA5/IL6/PDPK1/MAP2K1/BMP4/CREB1/CRKL/WNT5A/HES1	24
GO:0001701	in utero embryonic development	39/468	342/17913	9.58882e-15	2.2779e-13	9.40044e-14	TWIST1/AKT1/SMAD2/SNAI1/KLF2/VEGFA/MAPK1/GLI2/C5/FGFR1/CTNNB1/SMAD3/CCNB1/FOXF1/FOXD3/TP53/YBX1/IL10/CDKN1C/HIF1A/SETD2/AR/ANKRD11/EGFR/POU5F1/MAP2K1/CASP8/UBE2B/SMAD4/PTCH1/AMOT/CUL4A/LATS1/ARNT2/EPAS1/FZD5/PDGFB/HES1/ITGB1	39
GO:1903034	regulation of response to wounding	28/468	173/17913	9.78727e-15	2.31438e-13	9.55098e-14	PTEN/KRT1/CDKN1A/CDKN1B/MIR199A1/MIR21/MIR17/SMAD3/FOXA2/MIR34A/MIR222/IL10/MIR221/CAV1/NTRK3/MIR29B1/CADM4/MIR590/CXCR4/EPPK1/PRKCE/MAP2K1/CD36/NFE2L2/MIR155/SERPINE1/MTOR/PDGFB	28
GO:0010810	regulation of cell-substrate adhesion	30/468	201/17913	1.01765e-14	2.39542e-13	9.88544e-14	BCL2/PTEN/VEGFA/CDC42/GSK3B/SMAD3/CDK6/CDKN2A/FOXF1/FN1/MIR939/ANGPT2/HOXA7/SDC4/PIK3CB/NOTCH1/CSF1/PRKCE/SFRP1/MMP14/PTK2/CD36/RAC2/KDR/MIR29C/MIR503/SERPINE1/C1QBP/HAS2/CRKL	30
GO:0071214	cellular response to abiotic stimulus	37/468	310/17913	1.12849e-14	2.6323e-13	1.0863e-13	AKT1/BAX/CASP3/CASP9/PARP1/PTEN/MYC/SNAI2/KDM1A/CDKN1A/TGFB1/MAPK3/MAPK8/PCNA/TP53/PPEF1/YAP1/DHX36/SIRT1/TNFRSF10B/LTBR/NUCKS1/PTGS2/HMGA2/EGFR/NFKB1/TNFRSF10A/MAPK10/SFRP1/MAPK14/CASP8/MDM2/HDAC4/HSPA5/EP300/ATM/FAS	37
GO:0104004	cellular response to environmental stimulus	37/468	310/17913	1.12849e-14	2.6323e-13	1.0863e-13	AKT1/BAX/CASP3/CASP9/PARP1/PTEN/MYC/SNAI2/KDM1A/CDKN1A/TGFB1/MAPK3/MAPK8/PCNA/TP53/PPEF1/YAP1/DHX36/SIRT1/TNFRSF10B/LTBR/NUCKS1/PTGS2/HMGA2/EGFR/NFKB1/TNFRSF10A/MAPK10/SFRP1/MAPK14/CASP8/MDM2/HDAC4/HSPA5/EP300/ATM/FAS	37
GO:0060419	heart growth	23/468	112/17913	1.23782e-14	2.87431e-13	1.18617e-13	PTEN/CDK1/MIR199A1/MAPK1/MIR204/MIR24-1/FGFR1/CCNB1/MIR222/MIR23A/YAP1/MIR200B/MIR23B/MIR19A/MIR195/MEF2C/MIR19B1/MIR590/NOTCH1/MAPK14/MTOR/TGFB2/MIR1-1	23
GO:1903426	regulation of reactive oxygen species biosynthetic process	22/468	101/17913	1.28039e-14	2.95982e-13	1.22146e-13	MIR181A1/AKT1/KLF2/STAT3/MIR199A1/MIR21/MIR24-1/MIR181B1/SMAD3/IL10/CAV1/PTGS2/FOXO3/MIR590/SNCA/CD36/HDAC4/MIR155/MTOR/TNF/IFNG/MIR132	22
GO:0009314	response to radiation	44/468	435/17913	1.38211e-14	3.1807e-13	1.31261e-13	AKT1/BAX/BCL2/CASP3/CASP9/PARP1/CCND1/MYC/SNAI2/KDM1A/CDKN1A/TGFB1/SLC7A11/MAPK8/PCNA/KIT/SIK1/TP53/PPEF1/YAP1/DHX36/HIF1A/ANGPT2/SIRT1/HOXA1/NUCKS1/PTGS2/HMGA2/EGFR/PRKAA1/DRD1/MAPK10/SFRP1/MAPK14/CCAR2/MDM2/UBE2B/MTOR/HSPA5/RBM4/CREB1/EP300/ATM/ITGB1	44
GO:0071222	cellular response to lipopolysaccharide	28/468	176/17913	1.53607e-14	3.5193e-13	1.45235e-13	VIM/AKT1/CARD8/ABCC2/TGFB1/MAPK1/MAPK3/MAPK8/MIR21/PDCD4/MIR17/MIR20A/IL10/MEF2C/IL6/NFKB1/ABCA1/PRKCE/MAPK14/HMGB1/CCL2/CD36/CDK4/SERPINE1/MIR146A/TNF/BCR/WNT5A	28
GO:1905048	regulation of metallopeptidase activity	13/468	26/17913	1.7105e-14	3.90161e-13	1.61012e-13	MIR205/STAT3/MAPK3/MIR21/MIR24-1/MIR152/MIR17/TIMP3/MIR195/MIR29B1/TIMP2/MAPK14/MIR29C	13
GO:0090051	negative regulation of cell migration involved in sprouting angiogenesis	16/468	46/17913	1.76422e-14	4.00642e-13	1.65337e-13	MIR193A/MIR410/MIR20A/MIR424/MIR497/MIR221/MIR196A1/MIR19B1/NOTCH1/MIR206/MIR320A/MIR155/MIR29C/MIR503/MIR146A/MIR495	16
GO:0043406	positive regulation of MAP kinase activity	33/468	250/17913	1.77213e-14	4.00672e-13	1.6535e-13	EZH2/CDK1/TGFB1/VEGFA/MAPK1/MAPK3/RAF1/C5/FGFR1/BIRC7/KIT/FGF1/ERBB2/NTRK3/EGFR/PIK3CB/DUSP6/ZEB2/CXCR4/PRKAA1/LPAR1/ROBO1/MAP2K1/MAP2K2/MAPK10/MAPK14/BMP4/DUSP7/TNF/CRKL/FZD5/PDGFB/WNT5A	33
GO:0032103	positive regulation of response to external stimulus	37/468	315/17913	1.87759e-14	4.22662e-13	1.74424e-13	TGFB1/VEGFA/MAPK3/MIR21/FGFR1/PDCD4/MIR181B1/MIR17/SMAD3/NUPR1/IL33/MIR222/MIR221/MIR126/PTGS2/NTRK3/EGFR/IL6/MIR128-1/CXCR4/NEAT1/CSF1/LPAR1/MIR206/SNCA/MAPK14/HMGB1/MIR142/RAC2/KDR/MIR155/FABP4/SERPINE1/C1QBP/TNF/PDGFB/WNT5A	37
GO:2001236	regulation of extrinsic apoptotic signaling pathway	26/468	151/17913	1.95567e-14	4.38324e-13	1.80888e-13	AKT1/BCL2/PTEN/SNAI2/RAF1/TERT/FGFR1/TIMP3/MIR222/MIR221/YAP1/AR/TNFRSF10B/CAV1/TNFSF10/LTBR/TNFRSF10A/SFRP1/CASP8/BMP4/SERPINE1/MCL1/WWOX/FAIM2/TNF/FAS	26
GO:0048863	stem cell differentiation	32/468	237/17913	2.3462e-14	5.23579e-13	2.16071e-13	TWIST1/SNAI2/STAT3/RUNX2/MAPK1/MAPK3/RUNX1/KIT/CDK6/TP53/FN1/YAP1/DHX36/HIF1A/SETD2/HOXA7/HMGA2/MEF2C/ZEB2/NOTCH1/SFRP1/LTBP3/BMP4/SP7/NFE2L2/KMT2A/LRP6/SMAD4/MIR146A/SOX11/TGFB2/HES1	32
GO:0052548	regulation of endopeptidase activity	40/468	370/17913	2.59231e-14	5.76007e-13	2.37707e-13	MIR205/AKT1/BAX/CASP9/MMP9/MYC/SOX2/BIRC5/STAT3/CARD8/VEGFA/RAF1/BST2/C5/MIR21/MIR24-1/MIR152/MIR17/TIMP3/SMAD3/CD44/APAF1/SIRT1/TNFRSF10B/TNFSF10/PTGS2/MIR195/MIR29B1/MIR19B1/TNFRSF10A/ROBO1/SNCA/HMGB1/MAPT/CASP8/MDM2/MIR29C/SERPINE1/TNF/FAS	40
GO:0045785	positive regulation of cell adhesion	41/468	388/17913	2.63879e-14	5.82956e-13	2.40575e-13	AKT1/SOX2/SMAD7/TGFB1/VEGFA/GLI2/CDC42/MIR21/RUNX1/GSK3B/SMAD3/CD44/CDK6/FOXA2/FOXF1/IL10/FN1/ERBB2/CAV1/RUNX3/SDC4/IL6/PDPK1/CSF1/PRKCE/SFRP1/HMGB1/CCL2/CD36/KDR/MIR155/C1QBP/HAS2/TNF/IFNG/TGFB2/ATM/CRKL/WNT5A/MIR27B/HES1	41
GO:0051402	neuron apoptotic process	32/468	238/17913	2.6462e-14	5.82956e-13	2.40575e-13	BAX/BCL2/CASP3/CASP9/PARP1/NES/TERT/CLN3/CTNNB1/NUPR1/TP53/APAF1/MIR200A/HIF1A/RB1/MIR15B/MIR125B1/FOXO3/MEF2C/PDPK1/MYBL2/SNCA/MIR124-1/CCL2/HDAC4/MCL1/FBXW7/FAIM2/TNF/HSPA5/TGFB2/ATM	32
GO:0014013	regulation of gliogenesis	24/468	128/17913	2.79775e-14	6.11119e-13	2.52197e-13	EZH2/CDK1/TGFB1/CDH2/TERT/MIR181B1/CTNNB1/E2F1/MIR222/MIR221/MIR125B1/NTRK3/NOTCH1/IL6/CXCR4/CSF1/MIR142/MTOR/MIR146A/SOX11/TNF/CREB1/CRKL/HES1	24
GO:0045667	regulation of osteoblast differentiation	24/468	128/17913	2.79775e-14	6.11119e-13	2.52197e-13	TWIST1/SNAI2/RUNX2/MIR21/MIR210/CTNNB1/SMAD3/CDK6/MIR29B1/MEF2C/NOTCH1/IL6/MIR200C/CTHRC1/SFRP1/PTK2/BMP4/HDAC4/PTCH1/SOX11/MIR138-1/ESRRA/TNF/SUFU	24
GO:0045931	positive regulation of mitotic cell cycle	26/468	154/17913	3.18071e-14	6.91837e-13	2.85508e-13	AKT1/CCND1/CDK1/TGFB1/TERT/FGFR1/CCNE1/CCNB1/EIF4E/MIR222/MIR221/RB1/MIR372/EGFR/MIR590/CCND2/MDM2/MIR214/MIR29A/AURKA/CDT1/CDK4/CUL4A/PDGFB/MIR495/HES1	26
GO:0051348	negative regulation of transferase activity	34/468	272/17913	3.58828e-14	7.77208e-13	3.20739e-13	AKT1/CASP3/PTEN/LATS2/CDKN1A/CDKN1B/CDKN2B/SMAD7/MIR24-1/PDCD4/MIR218-1/MIR20A/GSK3B/CDKN2A/FOXA2/TP53/IGF1R/CDKN1C/SIRT1/RB1/CAV1/CDKN2C/DUSP6/PDPK1/SFRP1/MAPT/BMP4/DUSP7/FABP4/LRP6/TESC/MIR138-1/LATS1/PRKAR2A	34
GO:0072577	endothelial cell apoptotic process	18/468	65/17913	3.73836e-14	8.06328e-13	3.32756e-13	MIR125A/TERT/MIR24-1/PDCD4/IL10/MIR126/FOXO3/MIR590/PDPK1/MIR375/CCL2/KDR/NFE2L2/SERPINE1/ANGPTL4/TNF/MIR495/MIR132	18
GO:0031589	cell-substrate adhesion	37/468	322/17913	3.76253e-14	8.0816e-13	3.33512e-13	BCL2/PTEN/VAMP3/VEGFA/CDC42/CTNNB1/GSK3B/SMAD3/CD44/CDK6/CDKN2A/FOXF1/FN1/MIR939/ANGPT2/HOXA7/SDC4/PIK3CB/NOTCH1/PDPK1/ADAMTS12/CSF1/PRKCE/SFRP1/MMP14/PTK2/PXN/CD36/RAC2/KDR/MIR29C/MIR503/SERPINE1/C1QBP/HAS2/CRKL/ITGB1	37
GO:0048872	homeostasis of number of cells	32/468	241/17913	3.78189e-14	8.08948e-13	3.33837e-13	AKT1/BAX/BCL2/CASP3/EZH2/KLF2/STAT3/TGFB1/VEGFA/SLC7A11/CDH2/ZBTB7A/KIT/CDK6/MIR222/MIR221/HOXA5/HIF1A/ARID4A/RB1/PIK3CB/FOXO3/MEF2C/IL6/PTBP3/CSF1/MAPK14/HMGB1/BMP4/AKT3/BCR/EPAS1	32
GO:0001818	negative regulation of cytokine production	35/468	290/17913	4.33207e-14	9.19873e-13	3.79614e-13	MIR181A1/TWIST1/KLF2/CARD8/SMAD7/TGFB1/MIR204/BST2/MIR21/MIR24-1/FGFR1/PDCD4/MIR130A/MIR20A/IL33/MIR149/MIR222/IL10/MIR221/FN1/MIR125B1/MIR195/MIR590/IL6/NFKB1/MIR200C/HMGB1/MIR155/MIR146A/MIR488/C1QBP/TNF/IFNG/TGFB2/MIR132	35
GO:0055123	digestive system development	25/468	143/17913	4.35811e-14	9.19873e-13	3.79614e-13	BCL2/SMAD2/CDKN1A/TGFB1/GLI2/KIT/CTNNB1/SMAD3/CCNB1/FOXF1/CDKN1C/HOXA5/HIF1A/RB1/EGFR/MIR29B1/SFRP1/BMP4/SOX11/TNF/TGFB2/CRKL/WNT5A/HES1/TYMS	25
GO:0062013	positive regulation of small molecule metabolic process	25/468	143/17913	4.35811e-14	9.19873e-13	3.79614e-13	TWIST1/AKT1/CDK1/STAT3/WDR5/MIR210/FOXO1/CCNB1/MIR107/NUPR1/FGF1/HIF1A/SIRT1/PTGS2/NFKB1/PRKAA1/PRKCE/SNCA/MIR183/HAS2/MIR182/TNF/IFNG/PDGFB/MIR96	25
GO:0010001	glial cell differentiation	30/468	212/17913	4.37185e-14	9.19873e-13	3.79614e-13	VIM/AKT1/PTEN/SOX2/CDK1/STAT3/TGFB1/CDH2/MAPK1/MAPK3/SOX4/MIR181B1/CTNNB1/CDK6/ERBB2/CDKN2C/NTRK3/EGFR/NOTCH1/IL6/CXCR4/DRD1/LPAR1/MAP2K1/MIR142/MAPT/MTOR/SOX11/TNF/HES1	30
GO:0007179	transforming growth factor beta receptor signaling pathway	28/468	184/17913	4.87966e-14	1.02255e-12	4.21985e-13	PARP1/SMAD2/ZEB1/CDKN2B/SMAD7/TGFB1/MIR21/ZBTB7A/SMAD3/TP53/CDKN1C/SIRT1/CAV1/MIR15B/MIR29B1/PDPK1/CLDN5/CDH5/PTK2/PXN/MIR183/SMAD4/SOX11/ZNF703/HSPA5/CREB1/EP300/TGFB2	28
GO:0048145	regulation of fibroblast proliferation	20/468	86/17913	5.46996e-14	1.14161e-12	4.71118e-13	BAX/MYC/CDKN1A/TGFB1/MIR17/CTNNB1/CDK6/CCNB1/NUPR1/E2F1/TP53/FN1/EGFR/SFRP1/MIR124-1/MIR155/CDK4/CREB1/PDGFB/WNT5A	20
GO:0002237	response to molecule of bacterial origin	36/468	309/17913	5.52363e-14	1.14758e-12	4.73585e-13	VIM/AKT1/CASP3/CASP9/CARD8/ABCC2/TGFB1/MAPK1/MAPK3/MAPK8/MIR21/PDCD4/MIR17/MIR20A/IL10/PTGS2/MEF2C/IL6/NFKB1/ABCA1/PRKCE/SNCA/MAPK14/HMGB1/MIR142/CCL2/CD36/CASP8/MIR155/CDK4/SERPINE1/MIR146A/TNF/BCR/FZD5/WNT5A	36
GO:0055023	positive regulation of cardiac muscle tissue growth	16/468	49/17913	5.54312e-14	1.14758e-12	4.73585e-13	CDK1/MIR199A1/MAPK1/MIR204/FGFR1/CCNB1/MIR222/YAP1/MIR23B/MIR19A/MEF2C/MIR19B1/MIR590/NOTCH1/MAPK14/MTOR	16
GO:0071156	regulation of cell cycle arrest	22/468	108/17913	5.61131e-14	1.15705e-12	4.77493e-13	BAX/CCND1/CDKN1A/CDK1/CDK2/CDKN1B/TGFB1/SOX4/PCNA/CCNB1/MIR34A/E2F1/TP53/MIR200B/HMGA2/MDM2/AURKA/CDK4/FOXM1/CDC25C/EP300/ATM	22
GO:0150076	neuroinflammatory response	19/468	76/17913	5.6667e-14	1.16382e-12	4.80285e-13	MMP9/MIR181B1/NUPR1/IL33/MMP3/PTGS2/EGFR/MIR195/IL6/MIR128-1/MIR206/SNCA/MIR124-1/MIR142/MAPT/MIR155/TNF/IFNG/ATM	19
GO:0048565	digestive tract development	24/468	132/17913	5.72725e-14	1.17159e-12	4.83491e-13	BCL2/SMAD2/CDKN1A/TGFB1/GLI2/KIT/CTNNB1/SMAD3/CCNB1/FOXF1/HOXA5/HIF1A/RB1/EGFR/MIR29B1/SFRP1/BMP4/SOX11/TNF/TGFB2/CRKL/WNT5A/HES1/TYMS	24
GO:0097193	intrinsic apoptotic signaling pathway	34/468	277/17913	6.15553e-14	1.25422e-12	5.17592e-13	AKT1/BAX/BCL2/CASP3/CASP9/PARP1/MMP9/SNAI1/SNAI2/KDM1A/CDKN1A/MIR21/MIR17/CD44/NUPR1/E2F1/TP53/APAF1/HIF1A/SIRT1/TNFRSF10B/CAV1/PTGS2/SFPQ/CCAR2/MDM2/NFE2L2/MCL1/WWOX/FBXW7/TNF/CUL4A/EP300/MIR132	34
GO:0060043	regulation of cardiac muscle cell proliferation	17/468	58/17913	6.80557e-14	1.38121e-12	5.69999e-13	PTEN/CDK1/MIR199A1/MAPK1/MIR204/FGFR1/CCNB1/MIR222/YAP1/MIR200B/MIR23B/MEF2C/MIR19B1/MIR590/NOTCH1/MAPK14/MIR1-1	17
GO:0048144	fibroblast proliferation	20/468	87/17913	6.93349e-14	1.40165e-12	5.78435e-13	BAX/MYC/CDKN1A/TGFB1/MIR17/CTNNB1/CDK6/CCNB1/NUPR1/E2F1/TP53/FN1/EGFR/SFRP1/MIR124-1/MIR155/CDK4/CREB1/PDGFB/WNT5A	20
GO:0032496	response to lipopolysaccharide	35/468	295/17913	7.25717e-14	1.46136e-12	6.03073e-13	VIM/AKT1/CASP3/CASP9/CARD8/ABCC2/TGFB1/MAPK1/MAPK3/MAPK8/MIR21/PDCD4/MIR17/MIR20A/IL10/PTGS2/MEF2C/IL6/NFKB1/ABCA1/PRKCE/SNCA/MAPK14/HMGB1/MIR142/CCL2/CD36/CASP8/MIR155/CDK4/SERPINE1/MIR146A/TNF/BCR/WNT5A	35
GO:1901653	cellular response to peptide	39/468	364/17913	7.41696e-14	1.48772e-12	6.13954e-13	VIM/AKT1/PARP1/PTEN/KLF2/STAT3/ADIPOR1/TGFB1/MIR143/MIR145/GSK3B/FOXO1/MIR107/TP53/IGF1R/MIR200A/SIRT1/CAV1/MIR106B/NUCKS1/SP1/FOXO3/NFKB1/PDPK1/PRKAA1/CA2/MIR140/PTK2/PXN/RAP1B/CD36/MDM2/NFE2L2/CDK4/TSHR/MIR146A/ESRRA/CREB1/PRKAR2A	39
GO:0014009	glial cell proliferation	16/468	50/17913	7.95811e-14	1.59008e-12	6.56195e-13	TERT/SOX4/IL33/E2F1/MIR222/MIR221/MIR125B1/NOTCH1/IL6/CSF1/MTOR/MIR146A/SOX11/TNF/CREB1/HES1	16
GO:0071236	cellular response to antibiotic	25/468	147/17913	8.41183e-14	1.67425e-12	6.90929e-13	PTEN/EZH2/KLF2/CDK1/CDKN1B/MIR21/MIR17/PCNA/FOXO1/MIR107/MIR34A/TP53/IL10/SIRT1/FOXO3/MEF2C/IL6/ACTR2/PRKAA1/PRKCE/MDM2/NFE2L2/MIR155/HSPA5/PDGFB	25
GO:0060038	cardiac muscle cell proliferation	18/468	68/17913	8.89233e-14	1.76307e-12	7.27587e-13	PTEN/CDK1/MIR199A1/MAPK1/MIR204/FGFR1/CCNB1/MIR222/YAP1/MIR200B/MIR23B/MEF2C/MIR19B1/MIR590/NOTCH1/MAPK14/TGFB2/MIR1-1	18
GO:0036166	phenotypic switching	11/468	18/17913	9.30159e-14	1.82932e-12	7.54926e-13	MIR21/MIR143/MIR145/MIR221/DNMT1/SP1/MIR140/MIR214/MIR182/PDGFB/MIR1-1	11
GO:0010656	negative regulation of muscle cell apoptotic process	17/468	59/17913	9.33292e-14	1.82932e-12	7.54926e-13	MIR199A1/MIR21/MIR24-1/MIR17/MIR20A/MIR145/MIR210/NUPR1/DNMT1/MIR106B/MIR19A/MIR19B1/MIR590/PDPK1/NFE2L2/LRP6/MIR138-1	17
GO:2000351	regulation of endothelial cell apoptotic process	17/468	59/17913	9.33292e-14	1.82932e-12	7.54926e-13	MIR125A/TERT/MIR24-1/PDCD4/MIR126/FOXO3/MIR590/PDPK1/MIR375/CCL2/KDR/NFE2L2/SERPINE1/ANGPTL4/TNF/MIR495/MIR132	17
GO:0007517	muscle organ development	41/468	403/17913	9.49884e-14	1.85479e-12	7.65437e-13	TWIST1/BCL2/PTEN/CDK1/MIR199A1/SMAD7/TGFB1/MAPK1/MIR204/FGFR1/MIR143/MIR145/CTNNB1/SMAD3/CCNB1/NUPR1/MIR222/YAP1/MIR200B/SIRT1/RB1/CAV1/MIR23B/MIR19A/MIR195/MEF2C/MIR19B1/MIR590/NOTCH1/PRKAA1/MAPK14/BMP4/HDAC4/MTOR/SMAD4/SOX11/CREB1/EP300/TGFB2/WNT5A/MIR1-1	41
GO:0071901	negative regulation of protein serine/threonine kinase activity	24/468	136/17913	1.1415e-13	2.22054e-12	9.16372e-13	AKT1/CASP3/PTEN/LATS2/CDKN1A/CDKN1B/CDKN2B/MIR24-1/PDCD4/MIR218-1/MIR20A/CDKN2A/CDKN1C/SIRT1/RB1/CAV1/CDKN2C/DUSP6/SFRP1/BMP4/DUSP7/LRP6/LATS1/PRKAR2A	24
GO:0055021	regulation of cardiac muscle tissue growth	19/468	79/17913	1.21815e-13	2.36073e-12	9.74229e-13	PTEN/CDK1/MIR199A1/MAPK1/MIR204/FGFR1/CCNB1/MIR222/YAP1/MIR200B/MIR23B/MIR19A/MEF2C/MIR19B1/MIR590/NOTCH1/MAPK14/MTOR/MIR1-1	19
GO:0003158	endothelium development	23/468	124/17913	1.2377e-13	2.38964e-12	9.86157e-13	ZEB1/MIR21/MIR181B1/CTNNB1/MIR34A/FGF1/TJP1/FASN/MIR150/NOTCH1/CXCR4/MIR200C/ADAMTS12/STC1/CLDN5/CDH5/RAP1B/BMP4/KDR/SMAD4/TNF/MIR1-1/MIR495	23
GO:1901888	regulation of cell junction assembly	20/468	90/17913	1.38414e-13	2.66241e-12	1.09872e-12	PTEN/SNAI1/SNAI2/ACE2/VEGFA/RUNX1/SMAD3/TJP1/CAV1/SDC4/SFRP1/CLDN5/OCLN/MMP14/PTK2/RAP1B/KDR/MIR155/TNF/FZD5	20
GO:0051054	positive regulation of DNA metabolic process	30/468	222/17913	1.51605e-13	2.90529e-12	1.19896e-12	AKT1/BAX/PARP1/MYC/CDK1/CDK2/TGFB1/MAPK1/MAPK3/GLI2/FGFR1/PCNA/CTNNB1/ATF1/DHX36/SIRT1/DNMT1/MORC2/EGFR/IL6/ACTR2/CCT4/HMGB1/UBE2B/CDT1/FUS/FOXM1/HNRNPA2B1/ATM/PDGFB	30
GO:0016049	cell growth	44/468	466/17913	1.59195e-13	3.03655e-12	1.25313e-12	AKT1/BCL2/CDKN1A/CDKN1B/ADIPOR1/MIR199A1/TGFB1/VEGFA/BDNF/CDC42/BST2/MIR24-1/CTNNB1/GSK3B/SMAD3/CDKN2A/TP53/MIR23A/FN1/ERBB2/SIRT1/RB1/MIR23B/SGK1/MIR19A/CDKN2C/NTRK3/EPB41L3/EGFR/MIR195/MIR19B1/ZEB2/CXCR4/SFRP1/MMP14/CCAR2/MAPT/AURKA/MTOR/SMAD4/TGFB2/CRKL/WNT5A/ITGB1	44
GO:0014065	phosphatidylinositol 3-kinase signaling	24/468	138/17913	1.59632e-13	3.03655e-12	1.25313e-12	TWIST1/AKT1/PTEN/MAPK1/MAPK3/MIR21/FGFR1/MIR20A/KIT/IGF1R/ERBB2/SIRT1/MIR126/NOP53/NTRK3/EGFR/PIK3CB/MIR206/PTK2/KDR/C1QBP/TNF/TGFB2/PDGFB	24
GO:0032147	activation of protein kinase activity	35/468	303/17913	1.61834e-13	3.06711e-12	1.26574e-12	AKT1/CDK1/VEGFA/MAPK1/MAPK3/RAF1/C5/MIR21/BIRC7/MIR143/KIT/FGF1/TNFRSF10B/NTRK3/EGFR/PIK3CB/DUSP6/TNFRSF10A/CXCR4/PDPK1/PRKAA1/LPAR1/MAP2K1/MAP2K2/MAPK10/MAPK14/BMP4/DUSP7/MTOR/TNF/TGFB2/CRKL/PDGFB/PRKAR2A/WNT5A	35
GO:0009896	positive regulation of catabolic process	40/468	392/17913	1.75203e-13	3.30832e-12	1.36528e-12	TWIST1/AKT1/BAX/PTEN/CDKN1B/SMAD7/MAPK3/MIR181B1/MIR210/GSK3B/FOXO1/NUPR1/IL33/DHX36/HIF1A/SIRT1/CAV1/NNT/NOP53/SH3D19/PIK3CB/FOXO3/IL6/MAPK9/PRKAA1/PRKCE/SNCA/PTK2/MDM2/KDR/NFE2L2/AURKA/SH3GLB1/FBXW7/TNF/IFNG/ATM/WNT5A/ATG7/NKD2	40
GO:0007162	negative regulation of cell adhesion	33/468	271/17913	1.83087e-13	3.44458e-12	1.42151e-12	AKT1/CASP3/PTEN/SNAI2/CDH1/SMAD7/TGFB1/MIR21/RUNX1/CDKN2A/MIR222/IL10/MIR221/MIR939/ERBB2/ANGPT2/RUNX3/HOXA7/SDC4/NOTCH1/MIR31/MMP14/PTK2/HMGB1/BMP4/MIR155/MIR29C/MIR503/SERPINE1/MIR146A/MIR138-1/MIR141/ZNF703	33
GO:0043523	regulation of neuron apoptotic process	29/468	210/17913	2.21786e-13	4.14436e-12	1.7103e-12	BAX/BCL2/CASP3/CASP9/PARP1/NES/TERT/CLN3/CTNNB1/NUPR1/TP53/MIR200A/HIF1A/MIR15B/MIR125B1/FOXO3/MEF2C/PDPK1/MYBL2/SNCA/MIR124-1/CCL2/HDAC4/MCL1/FBXW7/FAIM2/TNF/TGFB2/ATM	29
GO:0072073	kidney epithelium development	24/468	140/17913	2.2189e-13	4.14436e-12	1.7103e-12	BCL2/MYC/SMAD2/SMAD7/TGFB1/VEGFA/FGFR1/CTNNB1/SMAD3/FGF1/YAP1/HOXA11/SDC4/MEF2C/POU3F3/BMPER/SFRP1/BMP4/SMAD4/PTCH1/PROM1/HOXB7/WNT6/HES1	24
GO:0060421	positive regulation of heart growth	16/468	53/17913	2.23246e-13	4.15463e-12	1.71453e-12	CDK1/MIR199A1/MAPK1/MIR204/FGFR1/CCNB1/MIR222/YAP1/MIR23B/MIR19A/MEF2C/MIR19B1/MIR590/NOTCH1/MAPK14/MTOR	16
GO:0031331	positive regulation of cellular catabolic process	37/468	341/17913	2.253e-13	4.17778e-12	1.72409e-12	TWIST1/AKT1/BAX/PTEN/SMAD7/MAPK3/MIR181B1/MIR210/GSK3B/FOXO1/NUPR1/IL33/DHX36/HIF1A/SIRT1/CAV1/NNT/NOP53/SH3D19/PIK3CB/FOXO3/IL6/MAPK9/PRKAA1/SNCA/PTK2/MDM2/KDR/NFE2L2/AURKA/SH3GLB1/FBXW7/TNF/IFNG/ATM/ATG7/NKD2	37
GO:0014855	striated muscle cell proliferation	19/468	82/17913	2.52707e-13	4.65252e-12	1.92e-12	PTEN/CDK1/STAT3/MIR199A1/MAPK1/MIR204/FGFR1/CCNB1/MIR222/YAP1/MIR200B/MIR23B/MEF2C/MIR19B1/MIR590/NOTCH1/MAPK14/TGFB2/MIR1-1	19
GO:0071158	positive regulation of cell cycle arrest	19/468	82/17913	2.52707e-13	4.65252e-12	1.92e-12	BAX/CDKN1A/CDK1/CDK2/CDKN1B/TGFB1/SOX4/PCNA/CCNB1/MIR34A/E2F1/TP53/MIR200B/HMGA2/MDM2/AURKA/CDC25C/EP300/ATM	19
GO:0072089	stem cell proliferation	22/468	116/17913	2.6401e-13	4.84331e-12	1.99874e-12	NANOG/NES/SNAI2/KDM1A/ABCB1/TGFB1/VEGFA/TERT/RUNX1/FGFR1/CTNNB1/TP53/MIR222/MIR137/MIR221/YAP1/HIF1A/HMGA2/MIR29B1/LTBP3/SOX11/WNT5A	22
GO:0000075	cell cycle checkpoint	28/468	197/17913	2.80288e-13	5.1237e-12	2.11445e-12	BAX/CCND1/CDKN1A/CDK1/CDK2/CDKN1B/CDKN2B/TGFB1/SOX4/MIR21/PCNA/CCNB1/E2F1/TP53/RB1/NOP53/VPS4A/HMGA2/MAPK14/CCAR2/MDM2/AURKA/CDT1/SOX11/CDC25C/CUL4A/EP300/ATM	28
GO:1905063	regulation of vascular smooth muscle cell differentiation	13/468	31/17913	3.01062e-13	5.48401e-12	2.26314e-12	MIR21/PDCD4/MIR424/MIR145/KIT/MIR221/DNMT1/MIR15B/MIR125B1/MIR140/MIR124-1/PDGFB/MIR1-1	13
GO:0030324	lung development	26/468	169/17913	3.06132e-13	5.55672e-12	2.29315e-12	SMAD2/KLF2/VEGFA/SLC7A11/MAPK1/MAPK3/GLI2/FGFR1/CTNNB1/FOXF1/EIF4E/FGF1/YAP1/HOXA5/EGFR/MAP2K1/MMP14/BMP4/SOX11/FBXW7/TNF/CREB1/EP300/EPAS1/WNT5A/HES1	26
GO:0000079	regulation of cyclin-dependent protein serine/threonine kinase activity	19/468	83/17913	3.19924e-13	5.78131e-12	2.38583e-12	AKT1/CASP3/PTEN/CCND1/LATS2/CDKN1A/CCNC/CDKN1B/CDKN2B/CDKN2A/CCNB1/CDKN1C/CDKN2C/EGFR/CCND2/CDK4/CDC25C/LATS1/PDGFB	19
GO:0033673	negative regulation of kinase activity	31/468	244/17913	3.20747e-13	5.78131e-12	2.38583e-12	AKT1/CASP3/PTEN/LATS2/CDKN1A/CDKN1B/CDKN2B/MIR24-1/PDCD4/MIR218-1/MIR20A/CDKN2A/FOXA2/IGF1R/CDKN1C/SIRT1/RB1/CAV1/CDKN2C/DUSP6/PDPK1/SFRP1/MAPT/BMP4/DUSP7/FABP4/LRP6/TESC/MIR138-1/LATS1/PRKAR2A	31
GO:0007492	endoderm development	18/468	73/17913	3.40381e-13	6.11382e-12	2.52305e-12	MMP2/MMP9/NANOG/SMAD2/SOX2/TGFB1/CTNNB1/SMAD3/FN1/SETD2/LAMB3/HMGA2/POU5F1/COL6A1/MMP14/BMP4/SMAD4/LAMA3	18
GO:0050728	negative regulation of inflammatory response	26/468	170/17913	3.52786e-13	6.31463e-12	2.60593e-12	MIR205/MIR181A1/KRT1/MIR204/PDCD4/MIR181B1/MIR20A/SMAD3/FOXF1/MIR149/MIR222/IL10/MIR221/RB1/MIR126/MIR195/MIR590/NFKB1/MIR31/MIR124-1/CDH5/MIR155/MIR488/MIR138-1/MIR141/BCR	26
GO:0019216	regulation of lipid metabolic process	40/468	402/17913	3.98239e-13	7.10353e-12	2.93149e-12	TWIST1/AKT1/SNAI1/SNAI2/ADIPOR1/TGFB1/MIR204/MIR33A/KIT/SIK1/FGF1/SIRT1/RB1/CAV1/FASN/PTGS2/MIR29B1/SP1/NFKB1/PRKAA1/ABCA1/PRKCE/SNCA/PTK2/CD36/MIR183/CDK4/MTOR/ANGPTL4/MIR138-1/FBXW7/MIR182/TNF/IFNG/IDH1/CREB1/PDGFB/MIR27B/MIR96/MIR132	40
GO:0060420	regulation of heart growth	19/468	84/17913	4.03592e-13	7.1742e-12	2.96065e-12	PTEN/CDK1/MIR199A1/MAPK1/MIR204/FGFR1/CCNB1/MIR222/YAP1/MIR200B/MIR23B/MIR19A/MEF2C/MIR19B1/MIR590/NOTCH1/MAPK14/MTOR/MIR1-1	19
GO:0046622	positive regulation of organ growth	17/468	64/17913	4.11316e-13	7.28637e-12	3.00694e-12	AKT1/CDK1/MIR199A1/MAPK1/MIR204/FGFR1/CCNB1/MIR222/YAP1/MIR23B/MIR19A/MEF2C/MIR19B1/MIR590/NOTCH1/MAPK14/MTOR	17
GO:0070374	positive regulation of ERK1 and ERK2 cascade	27/468	186/17913	4.4842e-13	7.91646e-12	3.26697e-12	PTEN/TGFB1/MAPK3/MIR21/MIR24-1/CD44/MIR222/MIR23A/MIR221/MIR126/MIR23B/EGFR/NOTCH1/BMPER/MAP2K1/HMGB1/RAP1B/CD36/BMP4/KDR/CALCR/NOTCH2/FBXW7/TNF/CRKL/PDGFB/MIR27B	27
GO:0060045	positive regulation of cardiac muscle cell proliferation	14/468	39/17913	4.72731e-13	8.31716e-12	3.43233e-12	CDK1/MIR199A1/MAPK1/MIR204/FGFR1/CCNB1/MIR222/YAP1/MIR23B/MEF2C/MIR19B1/MIR590/NOTCH1/MAPK14	14
GO:0030323	respiratory tube development	26/468	173/17913	5.36532e-13	9.40755e-12	3.88231e-12	SMAD2/KLF2/VEGFA/SLC7A11/MAPK1/MAPK3/GLI2/FGFR1/CTNNB1/FOXF1/EIF4E/FGF1/YAP1/HOXA5/EGFR/MAP2K1/MMP14/BMP4/SOX11/FBXW7/TNF/CREB1/EP300/EPAS1/WNT5A/HES1	26
GO:1902808	positive regulation of cell cycle G1/S phase transition	16/468	56/17913	5.828e-13	1.01842e-11	4.20282e-12	PAGR1/AKT1/EZH2/TERT/CCNE1/MIR222/MIR221/MIR372/EGFR/MIR590/CCND2/MDM2/MIR214/MIR29A/CUL4A/MIR495	16
GO:0045927	positive regulation of growth	32/468	266/17913	6.02092e-13	1.04858e-11	4.32727e-12	AKT1/BCL2/CDK1/MIR199A1/VEGFA/MAPK1/MIR204/BDNF/CDC42/FGFR1/CCNB1/MIR222/FN1/YAP1/ERBB2/MIR23B/MIR19A/NTRK3/EGFR/MEF2C/MIR19B1/MIR590/NOTCH1/CXCR4/CSF1/SFRP1/MAPK14/MMP14/MAPT/MTOR/CREB1/TGFB2	32
GO:2000027	regulation of animal organ morphogenesis	31/468	250/17913	6.19584e-13	1.07541e-11	4.43799e-12	TWIST1/BAX/BCL2/MYC/SNAI2/RUNX2/TGFB1/VEGFA/CDC42/FGFR1/MIR20A/CTNNB1/FGF1/AR/HOXA11/NOTCH1/CTHRC1/CSF1/GPC6/ROBO1/SFRP1/BMP4/SMAD4/FBXW7/TNF/HOXB7/TGFB2/FZD5/WNT5A/WNT6/HES1	31
GO:0044773	mitotic DNA damage checkpoint	19/468	86/17913	6.35776e-13	1.09981e-11	4.53869e-12	BAX/CCND1/CDKN1A/CDK1/CDK2/CDKN1B/SOX4/MIR21/PCNA/CCNB1/E2F1/TP53/NOP53/HMGA2/MDM2/AURKA/CDC25C/EP300/ATM	19
GO:0007093	mitotic cell cycle checkpoint	24/468	147/17913	6.71642e-13	1.15797e-11	4.7787e-12	BAX/CCND1/CDKN1A/CDK1/CDK2/CDKN1B/CDKN2B/TGFB1/SOX4/MIR21/PCNA/CCNB1/E2F1/TP53/RB1/NOP53/VPS4A/HMGA2/MDM2/AURKA/CDT1/CDC25C/EP300/ATM	24
GO:0043254	regulation of protein complex assembly	40/468	409/17913	6.9602e-13	1.19599e-11	4.93564e-12	TWIST1/BAX/PARP1/CDKN1B/TGFB1/VEGFA/RAF1/MMP1/CDC42/MIR17/CTNNB1/GSK3B/TP53/DHX36/MMP3/RB1/NOP53/ACTR2/MAPK9/PRKAA1/ABCA1/PRKCE/SNCA/HMGB1/CD36/MAPT/MIR214/CDT1/FSCN1/MTOR/SH3GLB1/WASL/TNF/IFNG/CUL4A/LATS1/CREB1/EP300/ATM/MIRLET7I	40
GO:1905207	regulation of cardiocyte differentiation	17/468	66/17913	7.1499e-13	1.22451e-11	5.05331e-12	MIR199A1/TGFB1/MIR204/MIR145/MIR222/DHX36/MIR200B/MIR19A/EGFR/MEF2C/MIR19B1/MIR590/BMP4/MTOR/SMAD4/TGFB2/MIR1-1	17
GO:0001657	ureteric bud development	20/468	98/17913	7.65951e-13	1.30744e-11	5.39556e-12	BCL2/MYC/SMAD2/SMAD7/TGFB1/VEGFA/FGFR1/CTNNB1/SMAD3/FGF1/HOXA11/SDC4/BMPER/SFRP1/BMP4/SMAD4/PTCH1/HOXB7/WNT6/HES1	20
GO:1903409	reactive oxygen species biosynthetic process	22/468	122/17913	7.74519e-13	1.3142e-11	5.42346e-12	MIR181A1/AKT1/KLF2/STAT3/MIR199A1/MIR21/MIR24-1/MIR181B1/SMAD3/IL10/CAV1/PTGS2/FOXO3/MIR590/SNCA/CD36/HDAC4/MIR155/MTOR/TNF/IFNG/MIR132	22
GO:0045666	positive regulation of neuron differentiation	37/468	355/17913	7.7501e-13	1.3142e-11	5.42346e-12	BCL2/PTEN/ZEB1/EZH2/KDM1A/VEGFA/GLI2/BDNF/FGFR1/FEZF1/MIR222/MIR137/MIR221/FN1/ATF1/DHX36/NTRK3/MEF2C/ZEB2/TIMP2/ACTR2/CXCR4/MIR200C/LPAR1/ROBO1/MAP2K1/MIR124-1/MAPT/BMP4/NFE2L2/MAPK6/MTOR/MIR146A/SOX11/HSPA5/EP300/WNT5A	37
GO:0043525	positive regulation of neuron apoptotic process	16/468	57/17913	7.91003e-13	1.33693e-11	5.51723e-12	BAX/CASP3/CASP9/CTNNB1/NUPR1/TP53/MIR200A/MIR125B1/FOXO3/MYBL2/HDAC4/MCL1/FBXW7/TNF/TGFB2/ATM	16
GO:1904029	regulation of cyclin-dependent protein kinase activity	19/468	87/17913	7.94046e-13	1.33768e-11	5.52035e-12	AKT1/CASP3/PTEN/CCND1/LATS2/CDKN1A/CCNC/CDKN1B/CDKN2B/CDKN2A/CCNB1/CDKN1C/CDKN2C/EGFR/CCND2/CDK4/CDC25C/LATS1/PDGFB	19
GO:0072163	mesonephric epithelium development	20/468	99/17913	9.36987e-13	1.56824e-11	6.47181e-12	BCL2/MYC/SMAD2/SMAD7/TGFB1/VEGFA/FGFR1/CTNNB1/SMAD3/FGF1/HOXA11/SDC4/BMPER/SFRP1/BMP4/SMAD4/PTCH1/HOXB7/WNT6/HES1	20
GO:0072164	mesonephric tubule development	20/468	99/17913	9.36987e-13	1.56824e-11	6.47181e-12	BCL2/MYC/SMAD2/SMAD7/TGFB1/VEGFA/FGFR1/CTNNB1/SMAD3/FGF1/HOXA11/SDC4/BMPER/SFRP1/BMP4/SMAD4/PTCH1/HOXB7/WNT6/HES1	20
GO:1904753	negative regulation of vascular associated smooth muscle cell migration	11/468	21/17913	9.60299e-13	1.60205e-11	6.61136e-12	MIR21/MIR218-1/MIR424/MIR34A/MIR137/MEF2C/MIR140/MIR214/NFE2L2/MIR503/MIR182	11
GO:0046620	regulation of organ growth	21/468	111/17913	9.73882e-13	1.61947e-11	6.68324e-12	AKT1/PTEN/CDK1/MIR199A1/MAPK1/MIR204/FGFR1/CCNB1/MIR222/YAP1/MIR200B/MIR23B/MIR19A/MEF2C/MIR19B1/MIR590/NOTCH1/MAPK14/PTK2/MTOR/MIR1-1	21
GO:0051403	stress-activated MAPK cascade	32/468	271/17913	1.00552e-12	1.6667e-11	6.87815e-12	MIR181A1/AKT1/MYC/VEGFA/MAPK1/MAPK3/MAPK8/PDCD4/BIRC7/MIR181B1/MIR20A/FOXO1/IGF1R/LTBR/EGFR/ZEB2/NFKB1/MAPK9/MAP2K1/MAP2K2/MAPK10/SFRP1/MAPK14/HMGB1/FOXM1/MIR138-1/TNF/TGFB2/CRKL/FAS/FZD5/WNT5A	32
GO:2001235	positive regulation of apoptotic signaling pathway	26/468	178/17913	1.05758e-12	1.74737e-11	7.21107e-12	BAX/BCL2/PTEN/MMP9/MAPK8/MIR210/GSK3B/TIMP3/SMAD3/NUPR1/E2F1/TP53/APAF1/SIRT1/CAV1/TNFSF10/LTBR/SFPQ/MAPK9/SFRP1/MIR26B/CASP8/MCL1/WWOX/FBXW7/FAS	26
GO:0072091	regulation of stem cell proliferation	17/468	68/17913	1.21744e-12	2.00509e-11	8.2746e-12	NANOG/SNAI2/KDM1A/TGFB1/VEGFA/TERT/CTNNB1/TP53/MIR222/MIR137/MIR221/YAP1/HIF1A/HMGA2/MIR29B1/LTBP3/SOX11	17
GO:0009416	response to light stimulus	34/468	307/17913	1.22305e-12	2.0079e-11	8.2862e-12	AKT1/BAX/BCL2/CASP3/CASP9/PARP1/CCND1/MYC/KDM1A/CDKN1A/SLC7A11/MAPK8/PCNA/KIT/SIK1/TP53/PPEF1/DHX36/HIF1A/SIRT1/HOXA1/PTGS2/EGFR/PRKAA1/DRD1/MAPK10/CCAR2/MDM2/UBE2B/MTOR/RBM4/CREB1/EP300/ITGB1	34
GO:0010952	positive regulation of peptidase activity	26/468	180/17913	1.37803e-12	2.25515e-11	9.30656e-12	MIR205/BAX/CASP9/MYC/STAT3/CARD8/MAPK3/MIR21/MIR17/SMAD3/APAF1/FN1/SIRT1/TNFRSF10B/CAV1/TNFSF10/MIR29B1/TNFRSF10A/ROBO1/SNCA/MAPK14/HMGB1/MAPT/CASP8/TNF/FAS	26
GO:0046890	regulation of lipid biosynthetic process	27/468	195/17913	1.42294e-12	2.29404e-11	9.46705e-12	AKT1/SNAI1/SNAI2/ADIPOR1/MIR204/MIR33A/SIK1/FGF1/SIRT1/FASN/PTGS2/MIR29B1/SP1/NFKB1/PRKAA1/MIR183/CDK4/MTOR/FBXW7/MIR182/TNF/IFNG/IDH1/CREB1/PDGFB/MIR96/MIR132	27
GO:1903707	negative regulation of hemopoiesis	24/468	152/17913	1.42349e-12	2.29404e-11	9.46705e-12	MYC/SMAD7/RBM15/MIR21/RUNX1/CTNNB1/CDK6/MIR222/MIR221/HOXA5/ERBB2/RUNX3/MIR125B1/HOXA7/HOXA9/NOTCH1/SFRP1/HMGB1/BMP4/NFE2L2/MIR155/FBXW7/CUL4A/HES1	24
GO:0072413	signal transduction involved in mitotic cell cycle checkpoint	16/468	59/17913	1.42849e-12	2.29404e-11	9.46705e-12	BAX/CDKN1A/CDK1/CDK2/CDKN1B/SOX4/MIR21/PCNA/CCNB1/E2F1/TP53/MDM2/AURKA/CDC25C/EP300/ATM	16
GO:0090342	regulation of cell aging	16/468	59/17913	1.42849e-12	2.29404e-11	9.46705e-12	TWIST1/PTEN/TERT/MIR21/MIR17/CDK6/CDKN2A/MIR34A/TP53/SIRT1/MIR217/HMGA2/MIR590/FOXM1/MIR146A/AKT3	16
GO:1902402	signal transduction involved in mitotic DNA damage checkpoint	16/468	59/17913	1.42849e-12	2.29404e-11	9.46705e-12	BAX/CDKN1A/CDK1/CDK2/CDKN1B/SOX4/MIR21/PCNA/CCNB1/E2F1/TP53/MDM2/AURKA/CDC25C/EP300/ATM	16
GO:1902403	signal transduction involved in mitotic DNA integrity checkpoint	16/468	59/17913	1.42849e-12	2.29404e-11	9.46705e-12	BAX/CDKN1A/CDK1/CDK2/CDKN1B/SOX4/MIR21/PCNA/CCNB1/E2F1/TP53/MDM2/AURKA/CDC25C/EP300/ATM	16
GO:0044774	mitotic DNA integrity checkpoint	19/468	90/17913	1.51828e-12	2.43065e-11	1.00308e-11	BAX/CCND1/CDKN1A/CDK1/CDK2/CDKN1B/SOX4/MIR21/PCNA/CCNB1/E2F1/TP53/NOP53/HMGA2/MDM2/AURKA/CDC25C/EP300/ATM	19
GO:0110110	positive regulation of animal organ morphogenesis	18/468	80/17913	1.85756e-12	2.96462e-11	1.22344e-11	TWIST1/BAX/MYC/TGFB1/VEGFA/FGFR1/CTNNB1/FGF1/AR/HOXA11/NOTCH1/CSF1/ROBO1/BMP4/SMAD4/HOXB7/TGFB2/WNT6	18
GO:0150077	regulation of neuroinflammatory response	15/468	51/17913	1.94407e-12	3.09311e-11	1.27647e-11	MMP9/MIR181B1/NUPR1/IL33/MMP3/PTGS2/MIR195/IL6/MIR128-1/MIR206/MIR124-1/MIR142/MIR155/TNF/ATM	15
GO:0031098	stress-activated protein kinase signaling cascade	32/468	278/17913	2.0196e-12	3.20339e-11	1.32198e-11	MIR181A1/AKT1/MYC/VEGFA/MAPK1/MAPK3/MAPK8/PDCD4/BIRC7/MIR181B1/MIR20A/FOXO1/IGF1R/LTBR/EGFR/ZEB2/NFKB1/MAPK9/MAP2K1/MAP2K2/MAPK10/SFRP1/MAPK14/HMGB1/FOXM1/MIR138-1/TNF/TGFB2/CRKL/FAS/FZD5/WNT5A	32
GO:0048639	positive regulation of developmental growth	26/468	183/17913	2.0354e-12	3.21856e-11	1.32824e-11	AKT1/BCL2/CDK1/MIR199A1/VEGFA/MAPK1/MIR204/BDNF/FGFR1/CCNB1/MIR222/FN1/YAP1/MIR23B/MIR19A/NTRK3/MEF2C/MIR19B1/MIR590/NOTCH1/CXCR4/CSF1/MAPK14/MAPT/MTOR/CREB1	26
GO:0001823	mesonephros development	20/468	103/17913	2.04704e-12	3.22706e-11	1.33174e-11	BCL2/MYC/SMAD2/SMAD7/TGFB1/VEGFA/FGFR1/CTNNB1/SMAD3/FGF1/HOXA11/SDC4/BMPER/SFRP1/BMP4/SMAD4/PTCH1/HOXB7/WNT6/HES1	20
GO:0031570	DNA integrity checkpoint	23/468	141/17913	2.08205e-12	3.27225e-11	1.35039e-11	BAX/CCND1/CDKN1A/CDK1/CDK2/CDKN1B/SOX4/MIR21/PCNA/CCNB1/E2F1/TP53/NOP53/HMGA2/MAPK14/CCAR2/MDM2/AURKA/CDT1/CDC25C/CUL4A/EP300/ATM	23
GO:0071229	cellular response to acid chemical	27/468	199/17913	2.32616e-12	3.64479e-11	1.50414e-11	AKT1/MMP2/ZEB1/KLF2/VEGFA/CCNB1/E2F1/YAP1/DNMT1/NTRK3/EGFR/PRKAA1/ABCA1/COL6A1/PRKCE/SFRP1/KDR/CDK4/COL4A1/MTOR/TESC/TNF/CREB1/ATM/PDGFB/WNT5A/WNT6	27
GO:0090092	regulation of transmembrane receptor protein serine/threonine kinase signaling pathway	28/468	215/17913	2.50556e-12	3.91399e-11	1.61523e-11	PARP1/SMAD2/ZEB1/CDKN2B/SMAD7/TGFB1/MIR20A/ZBTB7A/SMAD3/TP53/CDKN1C/SIRT1/CAV1/MIR15B/MIR29B1/NOTCH1/PDPK1/BMPER/SFRP1/MIR140/BMP4/SMAD4/SOX11/ZNF703/HSPA5/EP300/WNT5A/HES1	28
GO:0072331	signal transduction by p53 class mediator	31/468	264/17913	2.6651e-12	4.14183e-11	1.70925e-11	TWIST1/AKT1/BAX/BCL2/SNAI1/SNAI2/KDM1A/CDKN1A/CDK1/CDK2/CDKN1B/SOX4/MIR21/PCNA/CD44/CCNB1/NUPR1/E2F1/TP53/SIRT1/NOP53/FOXO3/PRKAA1/MAPK14/MDM2/AURKA/FOXM1/WWOX/CDC25C/EP300/ATM	31
GO:0003179	heart valve morphogenesis	15/468	52/17913	2.66748e-12	4.14183e-11	1.70925e-11	TWIST1/SNAI1/SNAI2/TGFB1/SOX4/RB1/MEF2C/NOTCH1/ROBO1/MDM2/BMP4/MTOR/SMAD4/NOTCH2/TGFB2	15
GO:0061041	regulation of wound healing	23/468	143/17913	2.82109e-12	4.36718e-11	1.80225e-11	PTEN/KRT1/CDKN1A/CDKN1B/MIR199A1/MIR17/SMAD3/FOXA2/MIR34A/MIR221/CAV1/MIR29B1/CADM4/MIR590/CXCR4/EPPK1/PRKCE/CD36/NFE2L2/MIR155/SERPINE1/MTOR/PDGFB	23
GO:0002761	regulation of myeloid leukocyte differentiation	21/468	117/17913	2.84273e-12	4.38751e-11	1.81064e-11	MYC/TGFB1/RUNX1/CTNNB1/CDK6/RB1/MIR125B1/HOXA7/CA2/CSF1/SFRP1/CASP8/MTOR/TESC/NOTCH2/FBXW7/ESRRA/TNF/IFNG/CUL4A/CREB1	21
GO:0007623	circadian rhythm	27/468	201/17913	2.9601e-12	4.52586e-11	1.86773e-11	PTEN/EZH2/CDK1/MAPK8/SUV39H1/GSK3B/SIK1/TP53/SIRT1/NTRK3/EGFR/SFPQ/MAPK9/PRKAA1/PSPC1/MAPK10/CCAR2/KMT2A/CDK4/SERPINE1/MTOR/FBXW7/RBM4/CREB1/EP300/ATG7/TYMS	27
GO:2001020	regulation of response to DNA damage stimulus	27/468	201/17913	2.9601e-12	4.52586e-11	1.86773e-11	TWIST1/BCL2/CASP9/PARP1/MYC/SNAI1/SNAI2/KDM1A/MIR21/PCNA/CD44/TP53/MIR221/SETD2/SIRT1/HMGA2/EGFR/ACTR2/HMGB1/CCAR2/MAPT/MDM2/FUS/FOXM1/MCL1/CUL4A/ATM	27
GO:0050920	regulation of chemotaxis	26/468	186/17913	2.98212e-12	4.52586e-11	1.86773e-11	TGFB1/VEGFA/MAPK3/C5/FGFR1/MIR424/SMAD3/MIR34A/FGF1/ANGPT2/NTRK3/NOTCH1/IL6/CXCR4/CSF1/LPAR1/ROBO1/MAPK14/HMGB1/CCL2/RAC2/KDR/SERPINE1/C1QBP/PDGFB/WNT5A	26
GO:0045446	endothelial cell differentiation	20/468	105/17913	2.98333e-12	4.52586e-11	1.86773e-11	ZEB1/MIR21/MIR181B1/CTNNB1/MIR34A/TJP1/FASN/MIR150/NOTCH1/CXCR4/MIR200C/STC1/CLDN5/CDH5/RAP1B/BMP4/SMAD4/TNF/MIR1-1/MIR495	20
GO:0034390	smooth muscle cell apoptotic process	13/468	36/17913	2.99383e-12	4.52586e-11	1.86773e-11	MIR21/MIR24-1/PDCD4/MIR17/MIR210/CDKN2A/SIRT1/DNMT1/MIR140/LRP6/MIR138-1/IFNG/MIR1-1	13
GO:0034391	regulation of smooth muscle cell apoptotic process	13/468	36/17913	2.99383e-12	4.52586e-11	1.86773e-11	MIR21/MIR24-1/PDCD4/MIR17/MIR210/CDKN2A/SIRT1/DNMT1/MIR140/LRP6/MIR138-1/IFNG/MIR1-1	13
GO:0060251	regulation of glial cell proliferation	13/468	36/17913	2.99383e-12	4.52586e-11	1.86773e-11	TERT/E2F1/MIR222/MIR221/MIR125B1/NOTCH1/IL6/MTOR/MIR146A/SOX11/TNF/CREB1/HES1	13
GO:0045598	regulation of fat cell differentiation	22/468	131/17913	3.45611e-12	5.20943e-11	2.14983e-11	MIR181A1/AKT1/SNAI2/TGFB1/MIR21/SMAD3/FOXO1/MIR107/E2F1/WIF1/SIRT1/PTGS2/MIR29B1/IL6/SFRP1/MAPK14/MTOR/TNF/CREB1/WNT5A/MIR27B/HES1	22
GO:1902105	regulation of leukocyte differentiation	31/468	267/17913	3.59543e-12	5.40363e-11	2.22997e-11	MYC/ZEB1/SMAD7/TGFB1/GLI2/MIR21/RUNX1/CTNNB1/CDK6/ERBB2/RB1/RUNX3/MIR125B1/HOXA7/CA2/CSF1/SFRP1/MMP14/HMGB1/CASP8/BMP4/MIR155/MTOR/TESC/NOTCH2/FBXW7/ESRRA/TNF/IFNG/CUL4A/CREB1	31
GO:0002262	myeloid cell homeostasis	23/468	145/17913	3.80218e-12	5.69774e-11	2.35135e-11	BAX/CASP3/KLF2/STAT3/VEGFA/SLC7A11/ZBTB7A/KIT/CDK6/MIR222/MIR221/HOXA5/HIF1A/ARID4A/RB1/PIK3CB/FOXO3/IL6/PTBP3/MAPK14/HMGB1/BMP4/EPAS1	23
GO:0033135	regulation of peptidyl-serine phosphorylation	21/468	119/17913	4.00136e-12	5.97884e-11	2.46735e-11	AKT1/BAX/BCL2/SMAD7/TGFB1/VEGFA/RAF1/CD44/CAV1/PTGS2/NTRK3/EGFR/IL6/PRKAA1/SNCA/CALCR/TNF/IFNG/LATS1/WNT5A/MIR132	21
GO:0031571	mitotic G1 DNA damage checkpoint	16/468	63/17913	4.33359e-12	6.43794e-11	2.65681e-11	BAX/CCND1/CDKN1A/CDK1/CDK2/CDKN1B/SOX4/PCNA/CCNB1/E2F1/TP53/MDM2/AURKA/CDC25C/EP300/ATM	16
GO:0044819	mitotic G1/S transition checkpoint	16/468	63/17913	4.33359e-12	6.43794e-11	2.65681e-11	BAX/CCND1/CDKN1A/CDK1/CDK2/CDKN1B/SOX4/PCNA/CCNB1/E2F1/TP53/MDM2/AURKA/CDC25C/EP300/ATM	16
GO:0048754	branching morphogenesis of an epithelial tube	23/468	146/17913	4.4055e-12	6.52596e-11	2.69314e-11	BCL2/MYC/TGFB1/VEGFA/RBM15/GLI2/CTNNB1/FOXF1/FGF1/YAP1/HOXA5/AR/HOXA11/CSF1/MMP14/BMP4/COL4A1/SMAD4/PTCH1/TNF/HOXB7/WNT5A/WNT6	23
GO:0048015	phosphatidylinositol-mediated signaling	24/468	160/17913	4.44633e-12	6.54881e-11	2.70257e-11	TWIST1/AKT1/PTEN/MAPK1/MAPK3/MIR21/FGFR1/MIR20A/KIT/IGF1R/ERBB2/SIRT1/MIR126/NOP53/NTRK3/EGFR/PIK3CB/MIR206/PTK2/KDR/C1QBP/TNF/TGFB2/PDGFB	24
GO:0098727	maintenance of cell number	24/468	160/17913	4.44633e-12	6.54881e-11	2.70257e-11	NANOG/SMAD2/SOX2/EZH2/STAT3/CDH2/RAF1/SOX4/MIR145/KIT/CTNNB1/FOXO1/FOXD3/EIF4E/YAP1/HMGA2/FOXO3/POU5F1/NOTCH1/SFRP1/SMAD4/NOTCH2/CUL4A/HES1	24
GO:0055006	cardiac cell development	18/468	84/17913	4.51638e-12	6.63303e-11	2.73732e-11	CDK1/MIR199A1/VEGFA/MIR21/MIR24-1/PDCD4/CCNB1/MIR23A/ATG5/MIR23B/MIR19A/MIR195/MAML1/MIR19B1/NOTCH1/BMP4/MTOR/SMAD4	18
GO:0000077	DNA damage checkpoint	22/468	133/17913	4.73513e-12	6.93454e-11	2.86175e-11	BAX/CCND1/CDKN1A/CDK1/CDK2/CDKN1B/SOX4/MIR21/PCNA/CCNB1/E2F1/TP53/NOP53/HMGA2/MAPK14/CCAR2/MDM2/AURKA/CDC25C/CUL4A/EP300/ATM	22
GO:0072395	signal transduction involved in cell cycle checkpoint	17/468	74/17913	5.37982e-12	7.85636e-11	3.24217e-11	BAX/CDKN1A/CDK1/CDK2/CDKN1B/SOX4/MIR21/PCNA/CCNB1/E2F1/TP53/MDM2/AURKA/SOX11/CDC25C/EP300/ATM	17
GO:0006469	negative regulation of protein kinase activity	28/468	222/17913	5.51391e-12	8.00682e-11	3.30426e-11	AKT1/CASP3/PTEN/LATS2/CDKN1A/CDKN1B/CDKN2B/MIR24-1/PDCD4/MIR218-1/MIR20A/CDKN2A/IGF1R/CDKN1C/SIRT1/RB1/CAV1/CDKN2C/DUSP6/PDPK1/SFRP1/BMP4/DUSP7/FABP4/LRP6/TESC/LATS1/PRKAR2A	28
GO:0045444	fat cell differentiation	28/468	222/17913	5.51391e-12	8.00682e-11	3.30426e-11	MIR181A1/AKT1/CCND1/SNAI2/TGFB1/MIR21/ZBTB7A/SMAD3/FOXO1/MIR107/E2F1/WIF1/LAMB3/SIRT1/PTGS2/HMGA2/MIR29B1/IL6/SFRP1/MAPK14/FABP4/MTOR/TNF/CREB1/EP300/WNT5A/MIR27B/HES1	28
GO:0043500	muscle adaptation	21/468	121/17913	5.59217e-12	8.09766e-11	3.34175e-11	PARP1/EZH2/MIR199A1/MIR21/MIR17/MIR20A/MIR145/SMAD3/FOXO1/MIR19A/FOXO3/MEF2C/MIR19B1/NOTCH1/PTK2/MIR214/HDAC4/MIR155/MTOR/SMAD4/MIR1-1	21
GO:0044783	G1 DNA damage checkpoint	16/468	64/17913	5.64101e-12	8.14549e-11	3.36149e-11	BAX/CCND1/CDKN1A/CDK1/CDK2/CDKN1B/SOX4/PCNA/CCNB1/E2F1/TP53/MDM2/AURKA/CDC25C/EP300/ATM	16
GO:0030098	lymphocyte differentiation	34/468	325/17913	6.13707e-12	8.83704e-11	3.64687e-11	BAX/BCL2/ZEB1/STAT3/RUNX2/SMAD7/TGFB1/GLI2/SOX4/MIR21/RUNX1/ZBTB7A/KIT/CTNNB1/CDK6/TP53/IL10/ATG5/ERBB2/RUNX3/IL6/SFRP1/MMP14/HMGB1/BMP4/HDAC4/MIR155/MTOR/NOTCH2/IFNG/EP300/ATM/FZD5/ITGB1	34
GO:0030857	negative regulation of epithelial cell differentiation	14/468	46/17913	6.35861e-12	9.10518e-11	3.75753e-11	CCND1/MMP9/ZEB1/EZH2/CTNNB1/GSK3B/YAP1/CAV1/HOXA7/MIR29B1/IFNG/MIR1-1/MIR495/HES1	14
GO:1900087	positive regulation of G1/S transition of mitotic cell cycle	14/468	46/17913	6.35861e-12	9.10518e-11	3.75753e-11	AKT1/TERT/CCNE1/MIR222/MIR221/MIR372/EGFR/MIR590/CCND2/MDM2/MIR214/MIR29A/CUL4A/MIR495	14
GO:0048017	inositol lipid-mediated signaling	24/468	163/17913	6.69049e-12	9.52748e-11	3.9318e-11	TWIST1/AKT1/PTEN/MAPK1/MAPK3/MIR21/FGFR1/MIR20A/KIT/IGF1R/ERBB2/SIRT1/MIR126/NOP53/NTRK3/EGFR/PIK3CB/MIR206/PTK2/KDR/C1QBP/TNF/TGFB2/PDGFB	24
GO:2001242	regulation of intrinsic apoptotic signaling pathway	24/468	163/17913	6.69049e-12	9.52748e-11	3.9318e-11	AKT1/BAX/BCL2/PARP1/MMP9/SNAI1/SNAI2/KDM1A/MIR21/MIR17/CD44/NUPR1/TP53/HIF1A/SIRT1/CAV1/PTGS2/SFPQ/CCAR2/MDM2/NFE2L2/MCL1/FBXW7/MIR132	24
GO:0034103	regulation of tissue remodeling	18/468	86/17913	6.90574e-12	9.80691e-11	4.04712e-11	BAX/MIR199A1/TGFB1/MIR143/MIR17/MIR20A/MIR34A/TP53/MIR15B/EGFR/MIR195/MIR29B1/IL6/CA2/SFRP1/MIR214/MIR155/BCR	18
GO:0060541	respiratory system development	26/468	193/17913	7.05599e-12	9.99275e-11	4.12382e-11	SMAD2/KLF2/VEGFA/SLC7A11/MAPK1/MAPK3/GLI2/FGFR1/CTNNB1/FOXF1/EIF4E/FGF1/YAP1/HOXA5/EGFR/MAP2K1/MMP14/BMP4/SOX11/FBXW7/TNF/CREB1/EP300/EPAS1/WNT5A/HES1	26
GO:0046677	response to antibiotic	34/468	328/17913	7.93665e-12	1.12092e-10	4.6258e-11	BCL2/CASP3/CASP9/PTEN/CCND1/EZH2/KDM1A/KLF2/CDK1/STAT3/CDKN1B/MIR21/MIR17/PCNA/FOXO1/MIR107/MIR34A/TP53/IL10/SIRT1/NTRK3/FOXO3/MEF2C/IL6/ACTR2/PRKAA1/PRKCE/CASP8/MDM2/NFE2L2/MIR155/HSPA5/PDGFB/TYMS	34
GO:0010611	regulation of cardiac muscle hypertrophy	17/468	76/17913	8.54031e-12	1.1996e-10	4.95051e-11	PARP1/MIR199A1/MIR21/MIR17/MIR20A/MIR145/SMAD3/FOXO1/MIR19A/MIR19B1/NOTCH1/PTK2/MIR214/MIR155/MTOR/SMAD4/MIR1-1	17
GO:0048844	artery morphogenesis	17/468	76/17913	8.54031e-12	1.1996e-10	4.95051e-11	MIR205/SMAD7/VEGFA/SOX4/MIR143/MIR145/FOXF1/HOXA1/MIR29B1/NOTCH1/BMP4/NOTCH3/MIR153-1/TGFB2/AKT3/MIR495/HES1	17
GO:0009411	response to UV	22/468	137/17913	8.73373e-12	1.22343e-10	5.04887e-11	AKT1/BAX/BCL2/CASP3/CASP9/PARP1/CCND1/MYC/KDM1A/CDKN1A/MAPK8/PCNA/TP53/DHX36/SIRT1/PTGS2/EGFR/PRKAA1/CCAR2/MDM2/UBE2B/EP300	22
GO:0006977	DNA damage response, signal transduction by p53 class mediator resulting in cell cycle arrest	15/468	56/17913	8.79004e-12	1.22799e-10	5.06766e-11	BAX/CDKN1A/CDK1/CDK2/CDKN1B/SOX4/PCNA/CCNB1/E2F1/TP53/MDM2/AURKA/CDC25C/EP300/ATM	15
GO:0061448	connective tissue development	29/468	243/17913	9.18599e-12	1.27983e-10	5.28162e-11	SNAI1/SNAI2/ZEB1/RUNX2/MIR125A/TGFB1/MAPK3/GLI2/MIR21/FGFR1/CTNNB1/SMAD3/CD44/HOXA5/HIF1A/SIRT1/HOXA11/HMGA2/MEF2C/ADAMTS12/CSF1/STC1/MAPK14/BMP4/CDK4/ESRRA/PDGFB/WNT5A/TYMS	29
GO:0051148	negative regulation of muscle cell differentiation	16/468	66/17913	9.41436e-12	1.30811e-10	5.39833e-11	EZH2/MIR199A1/BDNF/MIR21/PDCD4/YBX1/MIR222/MIR221/MIR200B/DNMT1/MIR15B/MIR590/NOTCH1/HDAC4/SMAD4/PDGFB	16
GO:1904683	regulation of metalloendopeptidase activity	10/468	19/17913	1.00802e-11	1.39338e-10	5.75021e-11	MIR205/STAT3/MIR21/MIR24-1/MIR152/MIR17/TIMP3/MIR195/MIR29B1/MIR29C	10
GO:0043281	regulation of cysteine-type endopeptidase activity involved in apoptotic process	26/468	196/17913	1.00821e-11	1.39338e-10	5.75021e-11	AKT1/BAX/CASP9/MMP9/MYC/SOX2/CARD8/VEGFA/RAF1/MIR17/SMAD3/CD44/APAF1/SIRT1/TNFRSF10B/TNFSF10/PTGS2/TNFRSF10A/ROBO1/SNCA/HMGB1/MAPT/CASP8/MDM2/TNF/FAS	26
GO:0030879	mammary gland development	22/468	138/17913	1.01423e-11	1.39796e-10	5.76912e-11	AKT1/BAX/CCND1/TGFB1/VEGFA/MAPK1/GLI2/FOXF1/HOXA5/HIF1A/AR/CAV1/FASN/HOXA9/CSF1/ROBO1/BMP4/PTCH1/ZNF703/LATS1/CREB1/WNT5A	22
GO:0045926	negative regulation of growth	29/468	244/17913	1.01765e-11	1.39893e-10	5.77312e-11	BCL2/PTEN/CDKN1A/CDKN1B/ADIPOR1/MIR199A1/TGFB1/BST2/SMAD3/CDKN2A/TP53/IL10/MIR200B/HIF1A/SIRT1/CDKN2C/NOTCH1/SFRP1/PTK2/CCAR2/CD36/BMP4/SMAD4/PTCH1/NOTCH2/TNF/TGFB2/WNT5A/MIR1-1	29
GO:0090398	cellular senescence	17/468	77/17913	1.06996e-11	1.46693e-10	6.05374e-11	TWIST1/CDKN1A/CDKN2B/TERT/MIR17/CDK6/CDKN2A/MIR34A/TP53/SIRT1/MIR217/HMGA2/MIR590/MAP2K1/MAPK14/MIR146A/AKT3	17
GO:0060840	artery development	19/468	100/17913	1.09951e-11	1.49947e-10	6.18801e-11	MIR205/SMAD7/VEGFA/SOX4/MIR143/MIR145/FOXF1/HOXA1/MIR29B1/NOTCH1/ROBO1/BMP4/NOTCH3/MIR153-1/TGFB2/AKT3/SUFU/MIR495/HES1	19
GO:2001237	negative regulation of extrinsic apoptotic signaling pathway	19/468	100/17913	1.09951e-11	1.49947e-10	6.18801e-11	AKT1/BCL2/SNAI2/RAF1/TERT/MIR222/MIR221/YAP1/AR/TNFRSF10B/TNFSF10/TNFRSF10A/CASP8/BMP4/SERPINE1/MCL1/FAIM2/TNF/FAS	19
GO:0072431	signal transduction involved in mitotic G1 DNA damage checkpoint	15/468	57/17913	1.16468e-11	1.57584e-10	6.50318e-11	BAX/CDKN1A/CDK1/CDK2/CDKN1B/SOX4/PCNA/CCNB1/E2F1/TP53/MDM2/AURKA/CDC25C/EP300/ATM	15
GO:1900408	negative regulation of cellular response to oxidative stress	15/468	57/17913	1.16468e-11	1.57584e-10	6.50318e-11	AKT1/SLC7A11/MIR21/MIR17/CTNNB1/IL10/HIF1A/SIRT1/MIR19A/MIR195/MIR29B1/NFE2L2/MIR155/MIR132/ATG7	15
GO:1902400	intracellular signal transduction involved in G1 DNA damage checkpoint	15/468	57/17913	1.16468e-11	1.57584e-10	6.50318e-11	BAX/CDKN1A/CDK1/CDK2/CDKN1B/SOX4/PCNA/CCNB1/E2F1/TP53/MDM2/AURKA/CDC25C/EP300/ATM	15
GO:0022407	regulation of cell-cell adhesion	37/468	389/17913	1.20358e-11	1.6242e-10	6.70278e-11	AKT1/CASP3/SNAI2/SOX2/CDH1/SMAD7/TGFB1/GLI2/CDC42/MIR21/RUNX1/CD44/FOXA2/MIR222/IL10/MIR221/ERBB2/CAV1/RUNX3/SDC4/IL6/MIR31/PDPK1/MAPK14/PTK2/HMGB1/CCL2/BMP4/MIR155/MIR146A/HAS2/MIR141/ZNF703/TNF/IFNG/WNT5A/HES1	37
GO:0061180	mammary gland epithelium development	16/468	67/17913	1.20745e-11	1.62516e-10	6.70674e-11	AKT1/BAX/CCND1/TGFB1/MAPK1/GLI2/FOXF1/HOXA5/HIF1A/AR/CSF1/ROBO1/PTCH1/ZNF703/LATS1/WNT5A	16
GO:0006109	regulation of carbohydrate metabolic process	26/468	198/17913	1.27405e-11	1.71034e-10	7.05825e-11	AKT1/STAT3/ADIPOR1/TGFB1/WDR5/ZBTB7A/MIR210/GSK3B/TFF3/FOXO1/FOXA2/SIK1/MIR107/NUPR1/TP53/HIF1A/SIRT1/NFKB1/PRKAA1/PRKCE/SNCA/HDAC4/MTOR/HAS2/EP300/PDGFB	26
GO:1903829	positive regulation of cellular protein localization	33/468	318/17913	1.57927e-11	2.11458e-10	8.72646e-11	AKT1/BCL2/PARP1/CDH1/CDK1/TGFB1/MAPK1/MAPK8/TERT/GSK3B/SMAD3/E2F1/TP53/ERBB2/PTGS2/EGFR/PDPK1/PRKAA1/CCT4/PRKCE/MAPK14/MAPT/CASP8/MDM2/RAC2/CDT1/SH3GLB1/FBXW7/TNF/IFNG/FZD5/ITGB1/NKD2	33
GO:0014743	regulation of muscle hypertrophy	17/468	79/17913	1.66143e-11	2.21883e-10	9.15668e-11	PARP1/MIR199A1/MIR21/MIR17/MIR20A/MIR145/SMAD3/FOXO1/MIR19A/MIR19B1/NOTCH1/PTK2/MIR214/MIR155/MTOR/SMAD4/MIR1-1	17
GO:0051152	positive regulation of smooth muscle cell differentiation	11/468	26/17913	1.86897e-11	2.48313e-10	1.02474e-10	TGFB1/MIR21/MIR424/MIR145/KIT/MIR34A/SIRT1/MIR125B1/MIR140/MIR124-1/MIR1-1	11
GO:1903588	negative regulation of blood vessel endothelial cell proliferation involved in sprouting angiogenesis	11/468	26/17913	1.86897e-11	2.48313e-10	1.02474e-10	MIR24-1/MIR193A/MIR410/MIR424/MIR497/MIR222/MIR15B/MIR155/MIR29C/MIR503/MIR495	11
GO:0071887	leukocyte apoptotic process	19/468	103/17913	1.89841e-11	2.51577e-10	1.03821e-10	AKT1/BAX/CASP3/CASP9/PTEN/SLC7A11/BIRC7/CDKN2A/TP53/IL10/HIF1A/SIRT1/PIK3CB/MEF2C/IL6/BMP4/MIR155/CRKL/WNT5A	19
GO:1902883	negative regulation of response to oxidative stress	15/468	59/17913	2.00795e-11	2.65409e-10	1.09529e-10	AKT1/SLC7A11/MIR21/MIR17/CTNNB1/IL10/HIF1A/SIRT1/MIR19A/MIR195/MIR29B1/NFE2L2/MIR155/MIR132/ATG7	15
GO:0045601	regulation of endothelial cell differentiation	13/468	41/17913	2.02631e-11	2.67152e-10	1.10248e-10	ZEB1/MIR21/MIR181B1/CTNNB1/MIR34A/MIR150/MIR200C/CLDN5/CDH5/BMP4/TNF/MIR1-1/MIR495	13
GO:0003151	outflow tract morphogenesis	17/468	80/17913	2.05963e-11	2.70852e-10	1.11775e-10	TWIST1/VEGFA/MIR17/MIR20A/CTNNB1/HIF1A/MEF2C/NOTCH1/ROBO1/CLDN5/BMP4/SMAD4/SOX11/TGFB2/CRKL/WNT5A/HES1	17
GO:0001706	endoderm formation	14/468	50/17913	2.25928e-11	2.96351e-10	1.22298e-10	MMP2/MMP9/NANOG/SMAD2/SOX2/CTNNB1/FN1/SETD2/LAMB3/HMGA2/POU5F1/COL6A1/MMP14/LAMA3	14
GO:1900239	regulation of phenotypic switching	9/468	15/17913	2.28857e-11	2.99431e-10	1.2357e-10	MIR143/MIR145/MIR221/DNMT1/SP1/MIR140/MIR214/MIR182/PDGFB	9
GO:0030111	regulation of Wnt signaling pathway	34/468	341/17913	2.33344e-11	3.04529e-10	1.25673e-10	SNAI2/SOX2/LATS2/CDH2/TERT/SOX4/RUNX1/MIR145/CTNNB1/GSK3B/SMAD3/FOXO1/MIR222/YAP1/WIF1/CAV1/EGFR/MIR29B1/FOXO3/MIR19B1/ZEB2/NFKB1/CTHRC1/SFRP1/MAPK14/CCAR2/UBE2B/LRP6/WWOX/ZNF703/LATS1/WNT5A/MIR1-1/NKD2	34
GO:0016055	Wnt signaling pathway	42/468	498/17913	2.34399e-11	3.04882e-10	1.25819e-10	PTEN/CCND1/SNAI2/SOX2/LATS2/CDH2/TERT/CDC42/SOX4/RUNX1/MIR145/CTNNB1/GSK3B/SMAD3/FOXO1/CCNE1/MIR222/YAP1/WIF1/CAV1/EGFR/MIR29B1/FOXO3/MIR19B1/ZEB2/NFKB1/PRKAA1/CTHRC1/GPC6/SFRP1/MAPK14/CCAR2/UBE2B/LRP6/WWOX/ZNF703/LATS1/FZD5/WNT5A/WNT6/MIR1-1/NKD2	42
GO:0019827	stem cell population maintenance	23/468	158/17913	2.34798e-11	3.04882e-10	1.25819e-10	NANOG/SMAD2/SOX2/STAT3/CDH2/RAF1/SOX4/MIR145/KIT/CTNNB1/FOXO1/FOXD3/EIF4E/YAP1/HMGA2/FOXO3/POU5F1/NOTCH1/SFRP1/SMAD4/NOTCH2/CUL4A/HES1	23
GO:0014066	regulation of phosphatidylinositol 3-kinase signaling	20/468	117/17913	2.40148e-11	3.11046e-10	1.28363e-10	TWIST1/PTEN/MAPK1/MAPK3/MIR21/FGFR1/MIR20A/KIT/SIRT1/MIR126/NOP53/NTRK3/EGFR/PIK3CB/MIR206/PTK2/KDR/TNF/TGFB2/PDGFB	20
GO:0035148	tube formation	22/468	144/17913	2.41909e-11	3.12541e-10	1.2898e-10	TWIST1/TGFB1/VEGFA/SOX4/MIR210/CTNNB1/APAF1/HIF1A/SETD2/HOXA1/SDC4/ZEB2/NOTCH1/CTHRC1/SFRP1/BMP4/PTCH1/SOX11/TGFB2/SUFU/WNT5A/WNT6	22
GO:0051897	positive regulation of protein kinase B signaling	24/468	173/17913	2.44424e-11	3.15002e-10	1.29995e-10	MIR199A1/TGFB1/MIR21/FGFR1/MIR143/KIT/MIR222/MIR221/FGF1/ERBB2/MIR126/EGFR/PIK3CB/PTK2/RAC2/MIR29A/CALCR/MTOR/MIR138-1/C1QBP/TNF/PDGFB/MIR132/ITGB1	24
GO:1905953	negative regulation of lipid localization	15/468	60/17913	2.61387e-11	3.36023e-10	1.3867e-10	AKT1/MIR144/MIR33A/MIR130B/MIR17/MIR34A/MIR148A/MIR19B1/IL6/NFKB1/MIR128-1/ABCA1/MIR302A/TNF/MIR27B	15
GO:0198738	cell-cell signaling by wnt	42/468	500/17913	2.66333e-11	3.41529e-10	1.40942e-10	PTEN/CCND1/SNAI2/SOX2/LATS2/CDH2/TERT/CDC42/SOX4/RUNX1/MIR145/CTNNB1/GSK3B/SMAD3/FOXO1/CCNE1/MIR222/YAP1/WIF1/CAV1/EGFR/MIR29B1/FOXO3/MIR19B1/ZEB2/NFKB1/PRKAA1/CTHRC1/GPC6/SFRP1/MAPK14/CCAR2/UBE2B/LRP6/WWOX/ZNF703/LATS1/FZD5/WNT5A/WNT6/MIR1-1/NKD2	42
GO:0055001	muscle cell development	23/468	159/17913	2.67958e-11	3.4276e-10	1.41451e-10	BCL2/KDM1A/CDK1/MIR199A1/VEGFA/MIR24-1/CCNB1/MIR23A/ATG5/MIR23B/MIR19A/MIR195/MAML1/MEF2C/MIR19B1/NOTCH1/BMP4/HDAC4/MTOR/SMAD4/MIR1-1/HES1/ITGB1	23
GO:0031348	negative regulation of defense response	28/468	237/17913	2.69292e-11	3.43614e-10	1.41803e-10	MIR205/MIR181A1/KRT1/MIR204/MIR21/PDCD4/MIR181B1/MIR20A/SMAD3/FOXF1/MIR149/MIR222/IL10/MIR221/RB1/MIR126/MIR195/MIR590/NFKB1/MIR31/MIR124-1/CDH5/MIR155/MIR488/MIR138-1/C1QBP/MIR141/BCR	28
GO:1904951	positive regulation of establishment of protein localization	39/468	440/17913	2.84077e-11	3.61584e-10	1.49219e-10	TWIST1/BCL2/CDH1/CARD8/TGFB1/MAPK1/MAPK3/MAPK8/C5/SOX4/GSK3B/SMAD3/IL33/E2F1/TP53/IL10/DHX36/ERBB2/HIF1A/PTGS2/EGFR/IL6/PRKAA1/CCT4/PRKCE/MAPK14/HMGB1/CASP8/MDM2/RAC2/MIR155/SH3GLB1/FBXW7/MIR182/TNF/IFNG/TGFB2/FZD5/WNT5A	39
GO:0072132	mesenchyme morphogenesis	14/468	51/17913	3.04059e-11	3.86065e-10	1.59321e-10	TWIST1/MYC/SMAD2/SNAI1/SNAI2/FGFR1/SMAD3/FOXF1/NOTCH1/ROBO1/MDM2/SMAD4/TGFB2/WNT5A	14
GO:0043502	regulation of muscle adaptation	19/468	106/17913	3.21432e-11	4.0712e-10	1.68011e-10	PARP1/MIR199A1/MIR21/MIR17/MIR20A/MIR145/SMAD3/FOXO1/MIR19A/FOXO3/MIR19B1/NOTCH1/PTK2/MIR214/HDAC4/MIR155/MTOR/SMAD4/MIR1-1	19
GO:0031334	positive regulation of protein complex assembly	28/468	239/17913	3.29406e-11	4.16198e-10	1.71757e-10	TWIST1/BAX/PARP1/CDKN1B/TGFB1/VEGFA/MMP1/CTNNB1/GSK3B/TP53/DHX36/MMP3/ACTR2/MAPK9/PRKCE/CD36/MAPT/CDT1/FSCN1/MTOR/SH3GLB1/WASL/TNF/IFNG/CUL4A/CREB1/ATM/MIRLET7I	28
GO:0003170	heart valve development	15/468	61/17913	3.38415e-11	4.25496e-10	1.75594e-10	TWIST1/SNAI1/SNAI2/TGFB1/SOX4/RB1/MEF2C/NOTCH1/ROBO1/MDM2/BMP4/MTOR/SMAD4/NOTCH2/TGFB2	15
GO:0048645	animal organ formation	15/468	61/17913	3.38415e-11	4.25496e-10	1.75594e-10	MAPK1/MAPK3/GLI2/FGFR1/MIR20A/CTNNB1/FGF1/AR/HOXA11/MEF2C/ROBO1/MAP2K1/BMP4/WNT5A/HES1	15
GO:1901654	response to ketone	25/468	191/17913	3.41366e-11	4.28161e-10	1.76694e-10	AKT1/CASP9/PARP1/CCND1/KLF2/CDKN1A/ABCC2/TGFB1/HOXB13/PCNA/FOXO1/EIF4E/YAP1/AR/SIRT1/CAV1/NTRK3/EGFR/FOXO3/PRKAA1/PRKCE/SFRP1/CDK4/TGFB2/TYMS	25
GO:0018108	peptidyl-tyrosine phosphorylation	34/468	346/17913	3.48088e-11	4.35532e-10	1.79736e-10	STAT3/TGFB1/VEGFA/MAPK3/BDNF/FGFR1/KIT/CD44/TP53/IGF1R/MIR221/ERBB2/CAV1/MIR106B/MIR19A/NTRK3/EGFR/CADM4/MIR19B1/IL6/PRKCE/MAP2K1/MAP2K2/SFRP1/PTK2/CD36/KDR/MTOR/MIR146A/FBXW7/TNF/IFNG/PDGFB/HES1	34
GO:0062014	negative regulation of small molecule metabolic process	19/468	107/17913	3.81527e-11	4.76216e-10	1.96525e-10	AKT1/PARP1/SNAI1/SNAI2/STAT3/TGFB1/MIR204/MIR21/MIR33A/MIR210/SIK1/NUPR1/TP53/SIRT1/NFKB1/SNCA/HDAC4/EP300/MIR132	19
GO:0061326	renal tubule development	18/468	95/17913	4.04996e-11	5.04289e-10	2.0811e-10	BCL2/MYC/TGFB1/VEGFA/CTNNB1/FGF1/YAP1/HOXA11/MEF2C/POU3F3/BMP4/COL4A1/SMAD4/PTCH1/PROM1/HOXB7/WNT6/HES1	18
GO:0048562	embryonic organ morphogenesis	30/468	276/17913	4.29546e-11	5.33569e-10	2.20193e-10	TWIST1/SMAD2/ZEB1/RUNX2/MAPK1/MAPK3/GLI2/FGFR1/CTNNB1/SMAD3/FOXF1/YAP1/HOXA5/HIF1A/SETD2/HOXA1/HOXA11/HOXA7/MEF2C/NOTCH1/CTHRC1/MMP14/BMP4/SOX11/HOXB7/BCR/FZD5/SUFU/WNT5A/HES1	30
GO:0018212	peptidyl-tyrosine modification	34/468	349/17913	4.40816e-11	5.46252e-10	2.25428e-10	STAT3/TGFB1/VEGFA/MAPK3/BDNF/FGFR1/KIT/CD44/TP53/IGF1R/MIR221/ERBB2/CAV1/MIR106B/MIR19A/NTRK3/EGFR/CADM4/MIR19B1/IL6/PRKCE/MAP2K1/MAP2K2/SFRP1/PTK2/CD36/KDR/MTOR/MIR146A/FBXW7/TNF/IFNG/PDGFB/HES1	34
GO:0003012	muscle system process	39/468	448/17913	4.88695e-11	6.03386e-10	2.49006e-10	VIM/PARP1/EZH2/ACE2/MIR199A1/SMAD7/MIR21/MIR24-1/MIR143/MIR17/MIR20A/MIR145/KIT/SMAD3/FOXO1/MIR23A/CACNA1C/CAV1/MIR15B/MIR23B/MIR19A/PTGS2/MIR195/FOXO3/MEF2C/MIR19B1/NOTCH1/CXCR4/DRD1/STC1/PTK2/PXN/MIR214/HDAC4/MIR155/MTOR/SMAD4/MIR153-1/MIR1-1	39
GO:0072401	signal transduction involved in DNA integrity checkpoint	16/468	73/17913	4.90434e-11	6.03386e-10	2.49006e-10	BAX/CDKN1A/CDK1/CDK2/CDKN1B/SOX4/MIR21/PCNA/CCNB1/E2F1/TP53/MDM2/AURKA/CDC25C/EP300/ATM	16
GO:0072422	signal transduction involved in DNA damage checkpoint	16/468	73/17913	4.90434e-11	6.03386e-10	2.49006e-10	BAX/CDKN1A/CDK1/CDK2/CDKN1B/SOX4/MIR21/PCNA/CCNB1/E2F1/TP53/MDM2/AURKA/CDC25C/EP300/ATM	16
GO:0007219	Notch signaling pathway	24/468	179/17913	5.08297e-11	6.23874e-10	2.57461e-10	AKT1/MYC/SNAI1/SNAI2/STAT3/CDKN1B/TGFB1/RBM15/ZBTB7A/KIT/CDK6/YBX1/MIR126/EGFR/MAML1/NOTCH1/ROBO1/MMP14/NOTCH3/NOTCH2/FBXW7/EP300/TGFB2/HES1	24
GO:0010506	regulation of autophagy	32/468	314/17913	5.20603e-11	6.3746e-10	2.63068e-10	AKT1/BCL2/CASP3/STAT3/MIR199A1/MAPK3/MAPK8/GSK3B/FOXO1/NUPR1/TP53/IL10/HIF1A/SIRT1/PIK3CB/FOXO3/HERC1/PRKAA1/SNCA/PTK2/HMGB1/MAPT/KDR/MTOR/MCL1/SH3GLB1/FBXW7/IFNG/EP300/ATM/FZD5/ATG7	32
GO:0010721	negative regulation of cell development	32/468	317/17913	6.67117e-11	8.14927e-10	3.36304e-10	VIM/BCL2/PTEN/SOX2/STAT3/MIR199A1/TGFB1/TERT/MIR181B1/MIR219A1/MIR210/CTNNB1/GSK3B/TP53/EIF4E/MIR137/NTRK3/MIR29B1/FOXO3/NOTCH1/IL6/LPAR1/PTK2/MDM2/SMAD4/MIR146A/NOTCH3/SOX11/FBXW7/TNF/WNT5A/HES1	32
GO:0033138	positive regulation of peptidyl-serine phosphorylation	17/468	86/17913	6.99269e-11	8.52183e-10	3.51679e-10	AKT1/BCL2/TGFB1/VEGFA/RAF1/CD44/CAV1/PTGS2/NTRK3/EGFR/IL6/SNCA/CALCR/TNF/IFNG/LATS1/WNT5A	17
GO:0060828	regulation of canonical Wnt signaling pathway	29/468	264/17913	7.07029e-11	8.59607e-10	3.54743e-10	SNAI2/SOX2/LATS2/CDH2/SOX4/MIR145/CTNNB1/GSK3B/SMAD3/FOXO1/MIR222/YAP1/CAV1/EGFR/MIR29B1/FOXO3/MIR19B1/NFKB1/CTHRC1/SFRP1/MAPK14/CCAR2/UBE2B/LRP6/ZNF703/LATS1/WNT5A/MIR1-1/NKD2	29
GO:1904645	response to amyloid-beta	14/468	54/17913	7.10529e-11	8.6183e-10	3.55661e-10	PARP1/MMP2/MMP9/GSK3B/IGF1R/MIR200A/MMP3/MIR106B/FOXO3/MIR200C/MIR140/CD36/CALCR/MIR146A	14
GO:0051216	cartilage development	24/468	182/17913	7.24436e-11	8.76635e-10	3.6177e-10	SNAI1/SNAI2/ZEB1/RUNX2/TGFB1/MAPK3/GLI2/MIR21/FGFR1/CTNNB1/SMAD3/CD44/HOXA5/HIF1A/HOXA11/HMGA2/MEF2C/ADAMTS12/STC1/MAPK14/BMP4/ESRRA/WNT5A/TYMS	24
GO:0048469	cell maturation	23/468	167/17913	7.43091e-11	8.97104e-10	3.70217e-10	BCL2/KDM1A/KLF2/CDKN1A/RUNX2/VEGFA/FGFR1/HOXB13/ZBTB7A/CTNNB1/CCNB1/CDKN1C/HOXA5/HIF1A/RB1/FOXO3/PTBP3/AURKA/MTOR/EPAS1/FZD5/HES1/TYMS	23
GO:0007160	cell-matrix adhesion	26/468	214/17913	7.46499e-11	8.99112e-10	3.71046e-10	BCL2/PTEN/VEGFA/CTNNB1/GSK3B/SMAD3/CD44/CDK6/CDKN2A/FN1/MIR939/HOXA7/SDC4/PIK3CB/PDPK1/ADAMTS12/CSF1/SFRP1/MMP14/PTK2/PXN/CD36/KDR/MIR29C/SERPINE1/ITGB1	26
GO:0031100	animal organ regeneration	16/468	75/17913	7.58132e-11	9.10996e-10	3.7595e-10	CCND1/EZH2/CDKN1A/IGF2R/CDK1/TGFB1/PCNA/IL10/ANGPT2/EGFR/NNMT/AURKA/CDK4/PTCH1/PKM/TYMS	16
GO:0035987	endodermal cell differentiation	13/468	45/17913	7.63237e-11	9.14996e-10	3.77601e-10	MMP2/MMP9/NANOG/SOX2/CTNNB1/FN1/SETD2/LAMB3/HMGA2/POU5F1/COL6A1/MMP14/LAMA3	13
GO:0001558	regulation of cell growth	36/468	396/17913	8.34326e-11	9.979e-10	4.11814e-10	AKT1/BCL2/CDKN1A/CDKN1B/ADIPOR1/MIR199A1/TGFB1/VEGFA/BDNF/CDC42/BST2/GSK3B/SMAD3/CDKN2A/TP53/FN1/ERBB2/SIRT1/RB1/SGK1/MIR19A/CDKN2C/NTRK3/EPB41L3/EGFR/MIR19B1/CXCR4/SFRP1/MMP14/CCAR2/MAPT/MTOR/SMAD4/TGFB2/CRKL/WNT5A	36
GO:0002064	epithelial cell development	25/468	199/17913	8.40969e-11	1.00352e-09	4.14132e-10	VIM/CDKN1A/FGFR1/HOXB13/CTNNB1/GSK3B/CDK6/HOXA5/HIF1A/AR/TJP1/ARID4A/FASN/MIR29B1/CXCR4/PDPK1/STC1/CLDN5/CDH5/RAP1B/BMP4/TNF/PDGFB/WNT5A/TYMS	25
GO:0014912	negative regulation of smooth muscle cell migration	12/468	37/17913	9.00493e-11	1.07206e-09	4.4242e-10	MIR21/MIR218-1/MIR424/MIR34A/MIR137/MEF2C/MIR140/MIR214/NFE2L2/MIR503/SERPINE1/MIR182	12
GO:0043393	regulation of protein binding	26/468	217/17913	1.02017e-10	1.21174e-09	5.00063e-10	AKT1/BAX/BCL2/MMP9/NES/KDM1A/MAPK3/MAPK8/TERT/BDNF/GSK3B/ANXA2/IL10/MIR148A/CAV1/MEF2C/CTHRC1/CD36/BMP4/HDAC4/AURKA/HSPA5/EP300/PDGFB/WNT5A/MIR27B	26
GO:0090257	regulation of muscle system process	28/468	251/17913	1.05482e-10	1.25002e-09	5.15859e-10	PARP1/ACE2/MIR199A1/SMAD7/MIR21/MIR143/MIR17/MIR20A/MIR145/KIT/SMAD3/FOXO1/CACNA1C/CAV1/MIR19A/PTGS2/FOXO3/MIR19B1/NOTCH1/STC1/PTK2/MIR214/HDAC4/MIR155/MTOR/SMAD4/MIR153-1/MIR1-1	28
GO:0048708	astrocyte differentiation	16/468	77/17913	1.15537e-10	1.36604e-09	5.63738e-10	VIM/STAT3/MAPK1/MAPK3/MIR181B1/CDK6/NTRK3/EGFR/NOTCH1/IL6/DRD1/MAP2K1/MIR142/MAPT/TNF/HES1	16
GO:0090288	negative regulation of cellular response to growth factor stimulus	22/468	156/17913	1.20776e-10	1.42472e-09	5.87953e-10	SMAD2/SMAD7/TGFB1/MIR20A/ZBTB7A/MIR424/SMAD3/TP53/SIRT1/CAV1/MIR15B/MIR29B1/CADM4/NOTCH1/PDPK1/ADAMTS12/BMPER/SFRP1/MIR503/HSPA5/WNT5A/MIR1-1	22
GO:1903202	negative regulation of oxidative stress-induced cell death	14/468	56/17913	1.21155e-10	1.42593e-09	5.88452e-10	AKT1/SLC7A11/MIR21/MIR17/CTNNB1/IL10/HIF1A/SIRT1/MIR19A/MIR195/MIR29B1/NFE2L2/MIR155/ATG7	14
GO:0010667	negative regulation of cardiac muscle cell apoptotic process	12/468	38/17913	1.28523e-10	1.50577e-09	6.21401e-10	MIR199A1/MIR21/MIR24-1/MIR20A/MIR145/NUPR1/MIR106B/MIR19A/MIR19B1/MIR590/PDPK1/NFE2L2	12
GO:0090050	positive regulation of cell migration involved in sprouting angiogenesis	12/468	38/17913	1.28523e-10	1.50577e-09	6.21401e-10	VEGFA/MIR23A/MIR126/MIR23B/PTGS2/MIR150/MIR31/KDR/MIR146A/AKT3/MIR27B/MIR132	12
GO:0072006	nephron development	21/468	142/17913	1.29362e-10	1.51215e-09	6.24036e-10	BCL2/MYC/MIR125A/TGFB1/VEGFA/CTNNB1/FGF1/YAP1/ANGPT2/HOXA11/MEF2C/POU3F3/BMP4/SMAD4/PTCH1/NOTCH3/PROM1/HOXB7/PDGFB/WNT6/HES1	21
GO:0045995	regulation of embryonic development	20/468	128/17913	1.29931e-10	1.51537e-09	6.25364e-10	SNAI1/CDK1/FGFR1/CTNNB1/FOXA2/IL10/MIR221/DHX36/AR/MIR150/MIR200C/SFRP1/BMP4/NFE2L2/AMOT/LAMA3/SUFU/WNT5A/MIR1-1/HES1	20
GO:0042110	T cell activation	38/468	443/17913	1.34445e-10	1.56448e-09	6.4563e-10	AKT1/BAX/BCL2/CASP3/ZEB1/STAT3/RUNX2/SMAD7/TGFB1/GLI2/CDC42/SOX4/MIR21/RUNX1/KIT/CTNNB1/SMAD3/CD44/CDK6/TP53/IL10/ATG5/ERBB2/CAV1/RUNX3/SDC4/IL6/PDPK1/HMGB1/CCL2/CASP8/BMP4/RAC2/MIR155/MTOR/IFNG/FZD5/HES1	38
GO:0032872	regulation of stress-activated MAPK cascade	26/468	220/17913	1.38635e-10	1.60961e-09	6.64253e-10	MIR181A1/AKT1/MYC/VEGFA/MAPK1/MAPK3/PDCD4/BIRC7/MIR181B1/MIR20A/FOXO1/IGF1R/LTBR/EGFR/ZEB2/MAP2K1/MAP2K2/SFRP1/HMGB1/FOXM1/MIR138-1/TNF/TGFB2/FAS/FZD5/WNT5A	26
GO:0014911	positive regulation of smooth muscle cell migration	13/468	47/17913	1.40226e-10	1.62222e-09	6.6946e-10	BCL2/TERT/MIR21/MIR143/MIR20A/MIR135B/MIR221/LPAR1/MDM2/HDAC4/MIR448/HAS2/PDGFB	13
GO:0017015	regulation of transforming growth factor beta receptor signaling pathway	19/468	115/17913	1.40351e-10	1.62222e-09	6.6946e-10	SMAD2/ZEB1/CDKN2B/SMAD7/TGFB1/ZBTB7A/SMAD3/TP53/CDKN1C/SIRT1/CAV1/MIR15B/MIR29B1/PDPK1/SMAD4/SOX11/ZNF703/HSPA5/EP300	19
GO:0048705	skeletal system morphogenesis	25/468	204/17913	1.44295e-10	1.66407e-09	6.86731e-10	TWIST1/MMP2/SMAD2/ZEB1/RUNX2/TGFB1/FGFR1/CTNNB1/SMAD3/HOXA5/SETD2/HOXA1/HOXA11/HOXA7/ANKRD11/MEF2C/STC1/SFRP1/MAPK14/MMP14/BMP4/SOX11/WWOX/HAS2/HOXB7	25
GO:0043434	response to peptide hormone	36/468	404/17913	1.46204e-10	1.68233e-09	6.94264e-10	AKT1/PARP1/PTEN/STAT3/CDKN1B/ADIPOR1/ABCC2/TGFB1/MIR143/MIR145/FOXO1/MIR107/IGF1R/IL10/SIRT1/CAV1/TNFSF10/NUCKS1/PTGS2/SP1/NFKB1/PDPK1/PRKAA1/CA2/PTK2/PXN/RAP1B/MDM2/NFE2L2/CDK4/LRP6/MTOR/TSHR/ESRRA/CREB1/PRKAR2A	36
GO:0045639	positive regulation of myeloid cell differentiation	17/468	90/17913	1.49111e-10	1.71195e-09	7.06489e-10	STAT3/TGFB1/RUNX1/MIR222/MIR221/HOXA5/HIF1A/RB1/FOXO3/CA2/CSF1/MAPK14/CASP8/TESC/TNF/IFNG/CREB1	17
GO:0071478	cellular response to radiation	23/468	173/17913	1.53382e-10	1.75707e-09	7.2511e-10	BAX/CASP9/PARP1/MYC/SNAI2/KDM1A/CDKN1A/TGFB1/PCNA/TP53/PPEF1/YAP1/DHX36/SIRT1/NUCKS1/PTGS2/HMGA2/SFRP1/MAPK14/MDM2/HSPA5/EP300/ATM	23
GO:0050900	leukocyte migration	39/468	467/17913	1.67978e-10	1.92001e-09	7.92352e-10	AKT1/MMP9/TGFB1/VEGFA/SLC7A11/MAPK3/MMP1/C5/MIR24-1/KIT/CD44/IL33/IL10/FN1/ANGPT2/TNFRSF10B/CAV1/HOXA7/SDC4/PIK3CB/IL6/TNFRSF10A/CXCR4/CSF1/MAPK14/MMP14/HMGB1/CCL2/RAC2/SERPINE1/C1QBP/WASL/TNF/TGFB2/BCR/CRKL/PDGFB/WNT5A/ITGB1	39
GO:0010212	response to ionizing radiation	21/468	144/17913	1.69156e-10	1.92543e-09	7.94587e-10	BAX/BCL2/CASP3/PARP1/CCND1/MYC/SNAI2/KDM1A/CDKN1A/TGFB1/TP53/YAP1/SIRT1/NUCKS1/HMGA2/PRKAA1/SFRP1/MAPK14/MDM2/HSPA5/ATM	21
GO:0070302	regulation of stress-activated protein kinase signaling cascade	26/468	222/17913	1.69572e-10	1.92543e-09	7.94587e-10	MIR181A1/AKT1/MYC/VEGFA/MAPK1/MAPK3/PDCD4/BIRC7/MIR181B1/MIR20A/FOXO1/IGF1R/LTBR/EGFR/ZEB2/MAP2K1/MAP2K2/SFRP1/HMGB1/FOXM1/MIR138-1/TNF/TGFB2/FAS/FZD5/WNT5A	26
GO:2000116	regulation of cysteine-type endopeptidase activity	26/468	222/17913	1.69572e-10	1.92543e-09	7.94587e-10	AKT1/BAX/CASP9/MMP9/MYC/SOX2/CARD8/VEGFA/RAF1/MIR17/SMAD3/CD44/APAF1/SIRT1/TNFRSF10B/TNFSF10/PTGS2/TNFRSF10A/ROBO1/SNCA/HMGB1/MAPT/CASP8/MDM2/TNF/FAS	26
GO:0010661	positive regulation of muscle cell apoptotic process	12/468	39/17913	1.81291e-10	2.05396e-09	8.47631e-10	PTEN/MIR24-1/PDCD4/MIR17/CDKN2A/MIR34A/TP53/MIR195/MIR140/MIR320A/IFNG/MIR1-1	12
GO:0033044	regulation of chromosome organization	31/468	311/17913	1.83615e-10	2.0712e-09	8.54742e-10	TWIST1/PARP1/MYC/SNAI2/KDM1A/TGFB1/VEGFA/MAPK1/MAPK3/MAPK8/CTNNB1/CCNB1/TP53/ATG5/DHX36/SIRT1/RB1/DNMT1/IWS1/MORC2/SFPQ/CCT4/SNCA/MAPT/UBE2B/KMT2A/CDT1/SMAD4/MIR182/HNRNPA2B1/ATM	31
GO:0060070	canonical Wnt signaling pathway	31/468	311/17913	1.83615e-10	2.0712e-09	8.54742e-10	PTEN/SNAI2/SOX2/LATS2/CDH2/SOX4/MIR145/CTNNB1/GSK3B/SMAD3/FOXO1/MIR222/YAP1/CAV1/EGFR/MIR29B1/FOXO3/MIR19B1/NFKB1/CTHRC1/SFRP1/MAPK14/CCAR2/UBE2B/LRP6/ZNF703/LATS1/FZD5/WNT5A/MIR1-1/NKD2	31
GO:0001952	regulation of cell-matrix adhesion	19/468	117/17913	1.90958e-10	2.14464e-09	8.85052e-10	BCL2/PTEN/VEGFA/GSK3B/SMAD3/CDK6/CDKN2A/MIR939/HOXA7/SDC4/PIK3CB/CSF1/SFRP1/MMP14/PTK2/CD36/KDR/MIR29C/SERPINE1	19
GO:1903844	regulation of cellular response to transforming growth factor beta stimulus	19/468	117/17913	1.90958e-10	2.14464e-09	8.85052e-10	SMAD2/ZEB1/CDKN2B/SMAD7/TGFB1/ZBTB7A/SMAD3/TP53/CDKN1C/SIRT1/CAV1/MIR15B/MIR29B1/PDPK1/SMAD4/SOX11/ZNF703/HSPA5/EP300	19
GO:0097237	cellular response to toxic substance	27/468	241/17913	2.07553e-10	2.32595e-09	9.59875e-10	PTEN/EZH2/KLF2/CDK1/MIR21/MIR17/PCNA/ABCG2/FOXO1/MIR107/MIR34A/IL10/SIRT1/NNT/PTGS2/FOXO3/IL6/NFKB1/PRKAA1/PRKCE/CD36/MDM2/KDR/NFE2L2/MIR155/TNF/PDGFB	27
GO:0002694	regulation of leukocyte activation	40/468	492/17913	2.16723e-10	2.42344e-09	1.00011e-09	AKT1/BCL2/CASP3/ZEB1/CDKN1A/SMAD7/TGFB1/GLI2/CDC42/MIR21/RUNX1/CTNNB1/FOXF1/IL33/IL10/ERBB2/CAV1/RUNX3/SDC4/MEF2C/IL6/MIR128-1/PDPK1/SFRP1/SNCA/MIR124-1/MMP14/HMGB1/MIR142/CCL2/BMP4/RAC2/MIR155/SOX11/TNF/IFNG/ATM/BCR/WNT5A/HES1	40
GO:0010950	positive regulation of endopeptidase activity	22/468	161/17913	2.25418e-10	2.51522e-09	1.03798e-09	MIR205/BAX/CASP9/MYC/STAT3/CARD8/MIR21/MIR17/SMAD3/APAF1/SIRT1/TNFRSF10B/TNFSF10/MIR29B1/TNFRSF10A/ROBO1/SNCA/HMGB1/MAPT/CASP8/TNF/FAS	22
GO:0090677	reversible differentiation	8/468	13/17913	2.34755e-10	2.61374e-09	1.07864e-09	MIR145/MIR221/DNMT1/MIR140/MIR214/MIR182/PDGFB/MIR1-1	8
GO:0000187	activation of MAPK activity	21/468	147/17913	2.50723e-10	2.78551e-09	1.14953e-09	CDK1/MAPK1/MAPK3/C5/BIRC7/KIT/FGF1/NTRK3/PIK3CB/DUSP6/CXCR4/PRKAA1/LPAR1/MAP2K1/MAP2K2/MAPK10/MAPK14/DUSP7/TNF/CRKL/WNT5A	21
GO:0072080	nephron tubule development	17/468	93/17913	2.56095e-10	2.83907e-09	1.17163e-09	BCL2/MYC/TGFB1/VEGFA/CTNNB1/FGF1/YAP1/HOXA11/MEF2C/POU3F3/BMP4/SMAD4/PTCH1/PROM1/HOXB7/WNT6/HES1	17
GO:0042176	regulation of protein catabolic process	33/468	354/17913	2.73602e-10	3.02269e-09	1.24741e-09	AKT1/PTEN/CDH1/CDKN1B/SMAD7/MIR181B1/GSK3B/TIMP3/SMAD3/FOXO1/NUPR1/IL33/ANXA2/IL10/CAV1/NOP53/SH3D19/EGFR/MAPK9/SNCA/PTK2/CCAR2/MDM2/NFE2L2/AURKA/FBXW7/TNF/IFNG/LATS1/SUFU/WNT5A/ATG7/NKD2	33
GO:0006367	transcription initiation from RNA polymerase II promoter	23/468	178/17913	2.73831e-10	3.02269e-09	1.24741e-09	BAX/PTEN/CCND1/CDKN1A/CCNC/CDK1/RUNX2/CCNB1/TP53/YAP1/DHX36/AR/CDK8/MAML1/NOTCH1/HNF4G/HMGB1/CDK4/NOTCH3/NOTCH2/ESRRA/CREB1/MIRLET7I	23
GO:0071241	cellular response to inorganic substance	24/468	194/17913	2.7809e-10	3.06314e-09	1.2641e-09	AKT1/PARP1/MMP9/CDH1/CDK2/CDKN1B/MAPK1/MAPK3/MAPK8/FOXO1/CCNB1/MMP3/PTGS2/EGFR/MEF2C/MAPK9/PRKAA1/SNCA/NFE2L2/FABP4/FUS/HSPA5/CREB1/WNT5A	24
GO:0021700	developmental maturation	28/468	262/17913	2.87748e-10	3.16277e-09	1.30521e-09	BCL2/PTEN/MMP2/KDM1A/KLF2/CDKN1A/RUNX2/VEGFA/FGFR1/HOXB13/ZBTB7A/CTNNB1/CCNB1/CDKN1C/HOXA5/HIF1A/RB1/FOXO3/PTBP3/CDH5/AURKA/MTOR/TGFB2/EPAS1/FZD5/WNT5A/HES1/TYMS	28
GO:0043409	negative regulation of MAPK cascade	23/468	179/17913	3.06709e-10	3.36401e-09	1.38826e-09	AKT1/PTEN/MYC/MIR21/PDCD4/MIR218-1/SPRY4/MIR20A/MIR424/TIMP3/FOXO1/IGF1R/MIR221/CAV1/DUSP6/MIR29B1/SFRP1/BMP4/DUSP7/MIR503/SMAD4/FOXM1/MIR138-1	23
GO:0032371	regulation of sterol transport	14/468	60/17913	3.29043e-10	3.58919e-09	1.48119e-09	MIR144/MIR33A/MIR130B/MIR17/ANXA2/SIRT1/MIR148A/MIR19B1/NFKB1/MIR128-1/ABCA1/MIR302A/PTCH1/MIR27B	14
GO:0032374	regulation of cholesterol transport	14/468	60/17913	3.29043e-10	3.58919e-09	1.48119e-09	MIR144/MIR33A/MIR130B/MIR17/ANXA2/SIRT1/MIR148A/MIR19B1/NFKB1/MIR128-1/ABCA1/MIR302A/PTCH1/MIR27B	14
GO:2000725	regulation of cardiac muscle cell differentiation	13/468	50/17913	3.29328e-10	3.58919e-09	1.48119e-09	MIR199A1/TGFB1/MIR204/MIR222/MIR200B/MIR19A/MEF2C/MIR19B1/MIR590/BMP4/MTOR/SMAD4/MIR1-1	13
GO:1901983	regulation of protein acetylation	15/468	71/17913	3.45368e-10	3.75606e-09	1.55005e-09	TWIST1/SNAI2/TGFB1/MAPK3/SOX4/GSK3B/MIR34A/ATG5/SIRT1/MIR217/IWS1/PRKAA1/SNCA/KMT2A/SMAD4	15
GO:0010664	negative regulation of striated muscle cell apoptotic process	12/468	41/17913	3.49182e-10	3.78158e-09	1.56058e-09	MIR199A1/MIR21/MIR24-1/MIR20A/MIR145/NUPR1/MIR106B/MIR19A/MIR19B1/MIR590/PDPK1/NFE2L2	12
GO:1905209	positive regulation of cardiocyte differentiation	12/468	41/17913	3.49182e-10	3.78158e-09	1.56058e-09	MIR199A1/TGFB1/MIR204/MIR145/DHX36/MIR19A/MEF2C/MIR19B1/BMP4/MTOR/TGFB2/MIR1-1	12
GO:0071496	cellular response to external stimulus	31/468	320/17913	3.74299e-10	4.0451e-09	1.66933e-09	AKT1/BCL2/SNAI2/CDKN1A/CDKN2B/TGFB1/MAPK1/MAPK3/MAPK8/FOXO1/FOXA2/TP53/SIRT1/TNFRSF10B/MIR125B1/LTBR/PTGS2/EGFR/NFKB1/TNFRSF10A/PRKAA1/SFRP1/CASP8/MDM2/NFE2L2/HDAC4/MTOR/SH3GLB1/HSPA5/FAS/ATG7	31
GO:0008625	extrinsic apoptotic signaling pathway via death domain receptors	16/468	83/17913	3.78388e-10	4.08073e-09	1.68404e-09	BAX/BCL2/PTEN/RAF1/TIMP3/MIR222/MIR221/TNFRSF10B/TNFSF10/TNFRSF10A/SFRP1/CASP8/SERPINE1/FAIM2/TNF/FAS	16
GO:1905288	vascular associated smooth muscle cell apoptotic process	9/468	19/17913	3.84801e-10	4.13261e-09	1.70545e-09	MIR21/MIR24-1/PDCD4/MIR17/MIR210/DNMT1/MIR140/MIR138-1/MIR1-1	9
GO:1905459	regulation of vascular associated smooth muscle cell apoptotic process	9/468	19/17913	3.84801e-10	4.13261e-09	1.70545e-09	MIR21/MIR24-1/PDCD4/MIR17/MIR210/DNMT1/MIR140/MIR138-1/MIR1-1	9
GO:0034612	response to tumor necrosis factor	29/468	284/17913	4.07456e-10	4.36202e-09	1.80012e-09	AKT1/CASP3/KLF2/CARD8/ABCC2/MAPK1/MAPK3/MIR24-1/MIR181B1/MIR152/MIR34A/SIRT1/LTBR/PTGS2/FOXO3/NFKB1/MIR31/ADAMTS12/SFRP1/OCLN/MAPK14/MIR142/CCL2/CASP8/NFE2L2/HDAC4/FABP4/HAS2/TNF	29
GO:0006352	DNA-templated transcription, initiation	26/468	231/17913	4.07855e-10	4.36202e-09	1.80012e-09	TWIST1/BAX/PTEN/CCND1/CDKN1A/CCNC/CDK1/RUNX2/MAPK3/CTNNB1/CCNB1/TP53/YAP1/DHX36/AR/CDK8/MAML1/NOTCH1/HNF4G/HMGB1/CDK4/NOTCH3/NOTCH2/ESRRA/CREB1/MIRLET7I	26
GO:0001890	placenta development	21/468	151/17913	4.17119e-10	4.44267e-09	1.8334e-09	AKT1/SNAI1/CDKN1B/RBM15/MAPK1/MAPK3/IL10/CDKN1C/HIF1A/SETD2/PTGS2/EGFR/STC1/MAP2K1/MAPK14/PTK2/CASP8/EPAS1/FZD5/PDGFB/HES1	21
GO:1905952	regulation of lipid localization	21/468	151/17913	4.17119e-10	4.44267e-09	1.8334e-09	AKT1/MIR144/MIR33A/MIR130B/MIR17/MIR34A/ANXA2/SIRT1/MIR148A/MIR19B1/IL6/NFKB1/MIR128-1/ABCA1/CD36/MIR155/MIR302A/PTCH1/FBXW7/TNF/MIR27B	21
GO:0035019	somatic stem cell population maintenance	15/468	72/17913	4.25932e-10	4.52718e-09	1.86828e-09	NANOG/SMAD2/SOX2/STAT3/RAF1/SOX4/MIR145/KIT/FOXD3/YAP1/POU5F1/SFRP1/SMAD4/CUL4A/HES1	15
GO:1903708	positive regulation of hemopoiesis	23/468	182/17913	4.28888e-10	4.54921e-09	1.87737e-09	STAT3/TGFB1/GLI2/MIR21/RUNX1/MIR222/MIR221/DHX36/HOXA5/HIF1A/RB1/RUNX3/FOXO3/CA2/CSF1/MAPK14/MMP14/HMGB1/CASP8/TESC/TNF/IFNG/CREB1	23
GO:0048146	positive regulation of fibroblast proliferation	13/468	51/17913	4.31591e-10	4.55912e-09	1.88146e-09	MYC/CDKN1A/TGFB1/MIR17/CDK6/CCNB1/E2F1/FN1/EGFR/MIR155/CDK4/PDGFB/WNT5A	13
GO:2000772	regulation of cellular senescence	13/468	51/17913	4.31591e-10	4.55912e-09	1.88146e-09	TWIST1/TERT/MIR17/CDK6/CDKN2A/MIR34A/TP53/SIRT1/MIR217/HMGA2/MIR590/MIR146A/AKT3	13
GO:0097305	response to alcohol	26/468	232/17913	4.48373e-10	4.72671e-09	1.95062e-09	AKT1/PARP1/PTEN/CCND1/SMAD2/KLF2/CDH1/CDKN1A/CDK1/STAT3/TGFB1/CTNNB1/NTRK3/FOXO3/ACTR2/PRKAA1/ABCA1/PRKCE/SFRP1/CASP8/CDK4/LRP6/PTCH1/MIR182/MIR96/TYMS	26
GO:0031056	regulation of histone modification	20/468	138/17913	5.17914e-10	5.44866e-09	2.24856e-09	TWIST1/SNAI2/KDM1A/TGFB1/VEGFA/MAPK3/MAPK8/CTNNB1/CCNB1/TP53/ATG5/SIRT1/DNMT1/IWS1/SNCA/UBE2B/KMT2A/SMAD4/MIR182/ATM	20
GO:0048332	mesoderm morphogenesis	15/468	73/17913	5.23404e-10	5.49521e-09	2.26776e-09	SMAD2/SNAI1/FGFR1/MIR145/SMAD3/FOXF1/SETD2/HOXA11/HMGA2/MIR150/MIR200C/BMP4/WNT5A/MIR1-1/ITGB1	15
GO:0008406	gonad development	25/468	217/17913	5.4347e-10	5.69429e-09	2.34992e-09	BAX/BCL2/CASP3/CCND1/VEGFA/KIT/NUPR1/AR/SIRT1/ARID4A/HOXA10/HOXA11/HOXA9/TNFSF10/FOXO3/SFRP1/MMP14/SMAD4/TESC/HSPA5/IDH1/TGFB2/ATM/CRKL/WNT5A	25
GO:0048704	embryonic skeletal system morphogenesis	16/468	85/17913	5.48831e-10	5.73879e-09	2.36829e-09	TWIST1/SMAD2/ZEB1/RUNX2/CTNNB1/SMAD3/HOXA5/SETD2/HOXA1/HOXA11/HOXA7/MEF2C/MMP14/BMP4/SOX11/HOXB7	16
GO:0009895	negative regulation of catabolic process	29/468	288/17913	5.66938e-10	5.91613e-09	2.44147e-09	AKT1/BCL2/STAT3/MIR199A1/MIR21/TIMP3/SMAD3/NUPR1/E2F1/TP53/ANXA2/YBX1/IL10/DHX36/NOP53/EGFR/HERC1/PRKAA1/SNCA/MAPK14/PTK2/CCAR2/HDAC4/MTOR/MIR146A/MCL1/TNF/SUFU/ATG7	29
GO:0043276	anoikis	11/468	34/17913	5.7289e-10	5.96616e-09	2.46212e-09	AKT1/BCL2/SNAI2/SIK1/E2F1/CAV1/NOTCH1/PTK2/MTOR/MCL1/ITGB1	11
GO:0022408	negative regulation of cell-cell adhesion	22/468	169/17913	5.81868e-10	6.04743e-09	2.49566e-09	AKT1/CASP3/SNAI2/CDH1/SMAD7/TGFB1/MIR21/RUNX1/MIR222/IL10/MIR221/ERBB2/RUNX3/SDC4/MIR31/PTK2/HMGB1/BMP4/MIR155/MIR146A/MIR141/ZNF703	22
GO:0051384	response to glucocorticoid	20/468	139/17913	5.9055e-10	6.12532e-09	2.5278e-09	BCL2/CASP3/CASP9/CCND1/CDKN1A/ABCC2/TGFB1/PCNA/FOXO1/EIF4E/IL10/PTGS2/NTRK3/EGFR/FOXO3/IL6/STC1/CALCR/TNF/TYMS	20
GO:0030301	cholesterol transport	17/468	98/17913	6.01938e-10	6.2309e-09	2.57137e-09	MIR144/MIR33A/MIR130B/MIR17/ANXA2/SIRT1/MIR148A/CAV1/VPS4A/MIR19B1/NFKB1/MIR128-1/ABCA1/CD36/MIR302A/PTCH1/MIR27B	17
GO:0034105	positive regulation of tissue remodeling	12/468	43/17913	6.46664e-10	6.68047e-09	2.7569e-09	BAX/MIR199A1/MIR143/MIR17/MIR20A/MIR34A/MIR15B/EGFR/MIR195/CA2/MIR214/MIR155	12
GO:0031960	response to corticosteroid	21/468	155/17913	6.82254e-10	7.02e-09	2.89702e-09	BCL2/CASP3/CASP9/PARP1/CCND1/CDKN1A/ABCC2/TGFB1/PCNA/FOXO1/EIF4E/IL10/PTGS2/NTRK3/EGFR/FOXO3/IL6/STC1/CALCR/TNF/TYMS	21
GO:0071695	anatomical structure maturation	21/468	155/17913	6.82254e-10	7.02e-09	2.89702e-09	BCL2/MMP2/KDM1A/KLF2/CDKN1A/HOXB13/ZBTB7A/CTNNB1/CCNB1/CDKN1C/HOXA5/HIF1A/RB1/FOXO3/PTBP3/CDH5/AURKA/MTOR/TGFB2/WNT5A/TYMS	21
GO:0030218	erythrocyte differentiation	18/468	112/17913	6.86558e-10	7.05021e-09	2.90948e-09	CASP3/KLF2/STAT3/VEGFA/ZBTB7A/KIT/CDK6/MIR222/MIR221/HOXA5/HIF1A/ARID4A/RB1/FOXO3/PTBP3/MAPK14/BMP4/EPAS1	18
GO:0007159	leukocyte cell-cell adhesion	31/468	328/17913	6.89061e-10	7.06185e-09	2.91429e-09	AKT1/CASP3/SMAD7/TGFB1/GLI2/CDC42/MIR21/RUNX1/CD44/MIR222/IL10/MIR221/ERBB2/CAV1/RUNX3/SDC4/IL6/MIR31/PDPK1/HMGB1/CCL2/BMP4/RAC2/MIR155/MIR146A/HAS2/MIR141/TNF/IFNG/HES1/ITGB1	31
GO:0043062	extracellular structure organization	34/468	387/17913	7.01011e-10	7.17007e-09	2.95895e-09	MMP2/MMP9/CDH1/TGFB1/MMP1/LAMC2/SMAD3/CD44/FOXF1/FN1/MMP3/LAMB3/RB1/ADAMTS5/SDC4/MIR29B1/NOTCH1/TIMP2/IL6/ABCA1/COL6A1/MMP14/PTK2/CD36/KDR/FSCN1/COL4A1/SERPINE1/HAS2/TNF/TGFB2/LAMA3/PDGFB/ITGB1	34
GO:0070301	cellular response to hydrogen peroxide	17/468	99/17913	7.09476e-10	7.24228e-09	2.98875e-09	EZH2/KLF2/CDK1/MIR21/MIR17/PCNA/FOXO1/MIR107/MIR34A/IL10/SIRT1/FOXO3/IL6/PRKAA1/MDM2/NFE2L2/MIR155	17
GO:0007389	pattern specification process	35/468	408/17913	7.40274e-10	7.54172e-09	3.11232e-09	SMAD2/SNAI1/ZEB1/GLI2/FGFR1/CTNNB1/SMAD3/FOXA2/FOXF1/FEZF1/TP53/FGF1/HIF1A/AR/HOXA10/HOXA11/HOXA9/MEF2C/ZEB2/NOTCH1/ROBO1/STC1/SFRP1/BMP4/AURKA/SMAD4/PTCH1/EP300/ATM/CRKL/FZD5/SUFU/WNT5A/WNT6/HES1	35
GO:0032768	regulation of monooxygenase activity	14/468	64/17913	8.25083e-10	8.37264e-09	3.45523e-09	AKT1/TERT/MIR130B/HIF1A/CAV1/EGFR/NFKB1/SNCA/MIR138-1/WASL/TNF/IFNG/MIR27B/MIR132	14
GO:2000378	negative regulation of reactive oxygen species metabolic process	14/468	64/17913	8.25083e-10	8.37264e-09	3.45523e-09	MIR181A1/BCL2/STAT3/MIR199A1/MIR21/TP53/IL10/ATG5/MMP3/HIF1A/CAV1/MIR590/BCR/MIR132	14
GO:0042752	regulation of circadian rhythm	18/468	114/17913	9.24207e-10	9.36009e-09	3.86273e-09	EZH2/CDK1/MAPK8/SUV39H1/GSK3B/SIK1/TP53/SFPQ/MAPK9/PRKAA1/PSPC1/MAPK10/CCAR2/MTOR/FBXW7/RBM4/CREB1/ATG7	18
GO:0032355	response to estradiol	19/468	128/17913	9.29171e-10	9.39191e-09	3.87586e-09	CASP3/CASP9/PTEN/CCND1/EZH2/STAT3/CDKN1B/TGFB1/PCNA/CTNNB1/IL10/PTGS2/EGFR/SFRP1/CASP8/PTCH1/ZNF703/ESRRA/ARNT2	19
GO:0045137	development of primary sexual characteristics	25/468	223/17913	9.6793e-10	9.76453e-09	4.02963e-09	BAX/BCL2/CASP3/CCND1/VEGFA/KIT/NUPR1/AR/SIRT1/ARID4A/HOXA10/HOXA11/HOXA9/TNFSF10/FOXO3/SFRP1/MMP14/SMAD4/TESC/HSPA5/IDH1/TGFB2/ATM/CRKL/WNT5A	25
GO:0002367	cytokine production involved in immune response	17/468	101/17913	9.79564e-10	9.86261e-09	4.07011e-09	SMAD7/TGFB1/MAPK3/BST2/KIT/IL10/ATG5/DHX36/SIRT1/IL6/MAPK14/CD36/MIR155/TNF/TGFB2/FZD5/WNT5A	17
GO:0016569	covalent chromatin modification	36/468	433/17913	9.85398e-10	9.902e-09	4.08636e-09	TWIST1/SNAI2/EZH2/KDM1A/CDK1/CDK2/TGFB1/VEGFA/MAPK3/MAPK8/SUZ12/WDR5/SUV39H1/CTNNB1/CCNB1/TP53/ATG5/SETD2/SIRT1/ARID4A/DNMT1/IWS1/MORC2/HMGA2/SFPQ/PRKAA1/DRD1/SNCA/UBE2B/HDAC4/KMT2A/AURKA/SMAD4/MIR182/EP300/ATM	36
GO:1903037	regulation of leukocyte cell-cell adhesion	29/468	295/17913	9.95744e-10	9.9865e-09	4.12124e-09	AKT1/CASP3/SMAD7/TGFB1/GLI2/CDC42/MIR21/RUNX1/CD44/MIR222/IL10/MIR221/ERBB2/CAV1/RUNX3/SDC4/IL6/MIR31/PDPK1/HMGB1/CCL2/BMP4/MIR155/MIR146A/HAS2/MIR141/TNF/IFNG/HES1	29
GO:0035924	cellular response to vascular endothelial growth factor stimulus	14/468	65/17913	1.02676e-09	1.02776e-08	4.24136e-09	AKT1/VEGFA/MIR20A/MIR424/MIR23A/MIR196A1/MIR23B/CADM4/NOTCH1/ADAMTS12/ROBO1/MAPK14/KDR/MIR27B	14
GO:1901215	negative regulation of neuron death	24/468	207/17913	1.06181e-09	1.06065e-08	4.3771e-09	AKT1/BAX/BCL2/NES/STAT3/SLC7A11/TERT/CLN3/CTNNB1/GSK3B/IL10/HIF1A/SIRT1/MIR15B/MEF2C/PDPK1/MIR200C/CSF1/SNCA/MIR124-1/CCL2/FAIM2/CREB1/ATG7	24
GO:0003206	cardiac chamber morphogenesis	19/468	129/17913	1.06374e-09	1.06065e-08	4.3771e-09	SMAD7/TGFB1/RBM15/SOX4/FOXF1/TP53/HIF1A/MEF2C/NOTCH1/ROBO1/MDM2/BMP4/SMAD4/SOX11/NOTCH2/TGFB2/WNT5A/MIR1-1/HES1	19
GO:0030198	extracellular matrix organization	31/468	334/17913	1.07453e-09	1.06934e-08	4.41297e-09	MMP2/MMP9/CDH1/TGFB1/MMP1/LAMC2/SMAD3/CD44/FOXF1/FN1/MMP3/LAMB3/RB1/ADAMTS5/MIR29B1/NOTCH1/TIMP2/IL6/COL6A1/MMP14/PTK2/KDR/FSCN1/COL4A1/SERPINE1/HAS2/TNF/TGFB2/LAMA3/PDGFB/ITGB1	31
GO:0032963	collagen metabolic process	17/468	102/17913	1.14757e-09	1.13983e-08	4.70387e-09	VIM/MMP2/MMP9/TGFB1/MMP1/MIR21/MIR218-1/MIR145/MIR149/MMP3/HIF1A/MIR29B1/IL6/MMP14/BMP4/MIR29A/ITGB1	17
GO:0060411	cardiac septum morphogenesis	15/468	77/17913	1.15377e-09	1.14379e-08	4.72019e-09	SMAD7/RBM15/SOX4/TP53/NOTCH1/ROBO1/MDM2/BMP4/SMAD4/SOX11/NOTCH2/TGFB2/WNT5A/MIR1-1/HES1	15
GO:0060412	ventricular septum morphogenesis	12/468	45/17913	1.15632e-09	1.14411e-08	4.72153e-09	SMAD7/RBM15/SOX4/NOTCH1/ROBO1/BMP4/SMAD4/SOX11/TGFB2/WNT5A/MIR1-1/HES1	12
GO:0090344	negative regulation of cell aging	10/468	28/17913	1.15917e-09	1.14473e-08	4.72409e-09	TWIST1/PTEN/TERT/MIR17/CDK6/SIRT1/HMGA2/MIR590/FOXM1/AKT3	10
GO:0071375	cellular response to peptide hormone stimulus	29/468	297/17913	1.16568e-09	1.14896e-08	4.74155e-09	AKT1/PARP1/PTEN/STAT3/ADIPOR1/TGFB1/MIR143/MIR145/FOXO1/MIR107/IGF1R/SIRT1/CAV1/NUCKS1/SP1/NFKB1/PDPK1/PRKAA1/CA2/PTK2/PXN/RAP1B/MDM2/NFE2L2/CDK4/TSHR/ESRRA/CREB1/PRKAR2A	29
GO:0097709	connective tissue replacement	9/468	21/17913	1.16863e-09	1.14967e-08	4.74448e-09	MIR199A1/TGFB1/MIR17/MIR34A/HIF1A/MIR15B/MIR195/MIR214/MIR155	9
GO:0022612	gland morphogenesis	18/468	116/17913	1.23604e-09	1.21367e-08	5.00859e-09	BAX/BCL2/SNAI2/TGFB1/GLI2/FGFR1/HOXB13/AR/CAV1/EGFR/CSF1/SFRP1/BMP4/PTCH1/FBXW7/TNF/TGFB2/WNT5A	18
GO:0045732	positive regulation of protein catabolic process	23/468	192/17913	1.24743e-09	1.22253e-08	5.04513e-09	AKT1/PTEN/CDKN1B/SMAD7/MIR181B1/GSK3B/FOXO1/NUPR1/IL33/CAV1/NOP53/SH3D19/MAPK9/PTK2/MDM2/NFE2L2/AURKA/FBXW7/TNF/IFNG/WNT5A/ATG7/NKD2	23
GO:0055002	striated muscle cell development	20/468	145/17913	1.26645e-09	1.23882e-08	5.11236e-09	BCL2/CDK1/MIR199A1/VEGFA/MIR24-1/CCNB1/MIR23A/ATG5/MIR23B/MIR19A/MIR195/MAML1/MEF2C/MIR19B1/BMP4/HDAC4/MTOR/SMAD4/MIR1-1/ITGB1	20
GO:0060627	regulation of vesicle-mediated transport	38/468	480/17913	1.32427e-09	1.29292e-08	5.33561e-09	PTEN/MIR199A1/TGFB1/VEGFA/MAPK1/MAPK3/MIR181B1/MIR17/MIR20A/GSK3B/FOXF1/ANXA2/ATG5/CAV1/SDC4/VPS4A/PIK3CB/ANKFY1/PDPK1/PRKAA1/DRD1/MAP2K1/MAP2K2/SNCA/HMGB1/RAP1B/CCL2/CD36/RAC2/ATG3/MIR155/SERPINE1/WASL/TNF/IFNG/BCR/WNT5A/MIR27B	38
GO:0003002	regionalization	30/468	318/17913	1.36543e-09	1.33059e-08	5.49108e-09	SMAD2/SNAI1/GLI2/FGFR1/CTNNB1/SMAD3/FOXA2/FOXF1/FEZF1/TP53/FGF1/AR/HOXA10/HOXA11/HOXA9/MEF2C/ZEB2/ROBO1/SFRP1/BMP4/AURKA/SMAD4/PTCH1/EP300/ATM/CRKL/FZD5/SUFU/WNT5A/HES1	30
GO:0001570	vasculogenesis	15/468	78/17913	1.39469e-09	1.35398e-08	5.58762e-09	TGFB1/VEGFA/CTNNB1/FOXF1/YAP1/QKI/SETD2/CAV1/NOTCH1/PTK2/KDR/HAS2/AMOT/FBXW7/MIR1-1	15
GO:0055013	cardiac muscle cell development	15/468	78/17913	1.39469e-09	1.35398e-08	5.58762e-09	CDK1/MIR199A1/VEGFA/MIR24-1/CCNB1/MIR23A/ATG5/MIR23B/MIR19A/MIR195/MAML1/MIR19B1/BMP4/MTOR/SMAD4	15
GO:0048706	embryonic skeletal system development	18/468	117/17913	1.42605e-09	1.38182e-08	5.70252e-09	TWIST1/SMAD2/ZEB1/RUNX2/CTNNB1/SMAD3/HOXA5/SETD2/HOXA1/HOXA11/HOXA7/HOXA9/MEF2C/MMP14/BMP4/SOX11/HOXB7/WNT5A	18
GO:0016331	morphogenesis of embryonic epithelium	20/468	146/17913	1.43253e-09	1.3855e-08	5.71769e-09	TWIST1/TGFB1/GLI2/SOX4/CTNNB1/APAF1/HIF1A/SETD2/AR/SDC4/ZEB2/CTHRC1/SFRP1/BMP4/PTCH1/SOX11/TGFB2/SUFU/WNT5A/WNT6	20
GO:0032369	negative regulation of lipid transport	12/468	46/17913	1.52777e-09	1.46933e-08	6.06366e-09	AKT1/MIR144/MIR33A/MIR130B/MIR17/MIR34A/MIR148A/MIR19B1/NFKB1/MIR128-1/MIR302A/MIR27B	12
GO:0061614	pri-miRNA transcription by RNA polymerase II	12/468	46/17913	1.52777e-09	1.46933e-08	6.06366e-09	STAT3/TGFB1/TERT/SMAD3/TP53/IL10/HIF1A/BMP4/HDAC4/SMAD4/TGFB2/PDGFB	12
GO:1904036	negative regulation of epithelial cell apoptotic process	12/468	46/17913	1.52777e-09	1.46933e-08	6.06366e-09	TERT/NUPR1/MIR126/MIR590/PDPK1/KDR/NFE2L2/SERPINE1/MTOR/ANGPTL4/MIR182/MIR495	12
GO:0055088	lipid homeostasis	19/468	132/17913	1.58354e-09	1.52014e-08	6.27331e-09	MIR144/MIR33A/MIR34A/SIRT1/MIR148A/CAV1/MIR19B1/MIR590/MIR128-1/PRKAA1/ABCA1/MIR155/MIR302A/FABP4/ANGPTL4/FBXW7/MIR182/MIR27B/MIR132	19
GO:0034405	response to fluid shear stress	11/468	37/17913	1.595e-09	1.52829e-08	6.30697e-09	AKT1/KLF2/SMAD7/TGFB1/MIR126/PTGS2/MEF2C/ABCA1/CA2/NFE2L2/HAS2	11
GO:0016570	histone modification	35/468	420/17913	1.59802e-09	1.52835e-08	6.3072e-09	TWIST1/SNAI2/EZH2/KDM1A/CDK1/CDK2/TGFB1/VEGFA/MAPK3/MAPK8/SUZ12/WDR5/SUV39H1/CTNNB1/CCNB1/TP53/ATG5/SETD2/SIRT1/ARID4A/DNMT1/IWS1/HMGA2/SFPQ/PRKAA1/DRD1/SNCA/UBE2B/HDAC4/KMT2A/AURKA/SMAD4/MIR182/EP300/ATM	35
GO:0061333	renal tubule morphogenesis	15/468	79/17913	1.68086e-09	1.6046e-08	6.62186e-09	BCL2/MYC/TGFB1/VEGFA/CTNNB1/FGF1/HOXA11/MEF2C/BMP4/COL4A1/SMAD4/PTCH1/HOXB7/WNT6/HES1	15
GO:0032372	negative regulation of sterol transport	10/468	29/17913	1.72822e-09	1.64372e-08	6.78333e-09	MIR144/MIR33A/MIR130B/MIR17/MIR148A/MIR19B1/NFKB1/MIR128-1/MIR302A/MIR27B	10
GO:0032375	negative regulation of cholesterol transport	10/468	29/17913	1.72822e-09	1.64372e-08	6.78333e-09	MIR144/MIR33A/MIR130B/MIR17/MIR148A/MIR19B1/NFKB1/MIR128-1/MIR302A/MIR27B	10
GO:1902041	regulation of extrinsic apoptotic signaling pathway via death domain receptors	13/468	57/17913	1.92333e-09	1.82256e-08	7.52136e-09	PTEN/RAF1/TIMP3/MIR222/MIR221/TNFRSF10B/TNFSF10/TNFRSF10A/SFRP1/CASP8/SERPINE1/FAIM2/FAS	13
GO:1903428	positive regulation of reactive oxygen species biosynthetic process	13/468	57/17913	1.92333e-09	1.82256e-08	7.52136e-09	AKT1/KLF2/MIR24-1/MIR181B1/SMAD3/PTGS2/FOXO3/CD36/HDAC4/MIR155/MTOR/TNF/IFNG	13
GO:2000810	regulation of bicellular tight junction assembly	9/468	22/17913	1.93216e-09	1.82757e-08	7.54204e-09	SNAI1/SNAI2/RUNX1/TJP1/CLDN5/OCLN/MIR155/TNF/FZD5	9
GO:0031346	positive regulation of cell projection organization	32/468	362/17913	1.93961e-09	1.83126e-08	7.55727e-09	EZH2/KDM1A/VEGFA/BDNF/CDC42/MIR21/FGFR1/KIT/MIR222/MIR221/FN1/ATF1/DHX36/NTRK3/ZEB2/ACTR2/CXCR4/MIR200C/LPAR1/ROBO1/MAP2K1/MAPT/RAC2/NFE2L2/HDAC4/MAPK6/FSCN1/MTOR/WASL/HSPA5/EP300/WNT5A	32
GO:0051222	positive regulation of protein transport	34/468	403/17913	2.00861e-09	1.89294e-08	7.81179e-09	TWIST1/CDH1/CARD8/TGFB1/MAPK1/MAPK3/C5/SOX4/GSK3B/SMAD3/IL33/TP53/IL10/DHX36/ERBB2/HIF1A/PTGS2/EGFR/IL6/PRKAA1/PRKCE/MAPK14/HMGB1/MDM2/RAC2/MIR155/SH3GLB1/FBXW7/MIR182/TNF/IFNG/TGFB2/FZD5/WNT5A	34
GO:0001838	embryonic epithelial tube formation	18/468	120/17913	2.17013e-09	2.03094e-08	8.38129e-09	TWIST1/TGFB1/SOX4/CTNNB1/APAF1/HIF1A/SETD2/SDC4/ZEB2/CTHRC1/SFRP1/BMP4/PTCH1/SOX11/TGFB2/SUFU/WNT5A/WNT6	18
GO:0034101	erythrocyte homeostasis	18/468	120/17913	2.17013e-09	2.03094e-08	8.38129e-09	CASP3/KLF2/STAT3/VEGFA/ZBTB7A/KIT/CDK6/MIR222/MIR221/HOXA5/HIF1A/ARID4A/RB1/FOXO3/PTBP3/MAPK14/BMP4/EPAS1	18
GO:0051101	regulation of DNA binding	18/468	120/17913	2.17013e-09	2.03094e-08	8.38129e-09	TWIST1/PARP1/MMP9/KDM1A/TGFB1/MAPK8/ZBTB7A/CTNNB1/E2F1/RB1/HMGA2/HMGB1/CDT1/SOX11/FBXW7/IFNG/EP300/HES1	18
GO:0051099	positive regulation of binding	22/468	181/17913	2.17474e-09	2.03094e-08	8.38129e-09	TWIST1/PARP1/MMP9/KDM1A/TGFB1/TERT/BDNF/CTNNB1/GSK3B/ANXA2/RB1/CAV1/HMGA2/MEF2C/CTHRC1/HMGB1/BMP4/CDT1/IFNG/EP300/WNT5A/HES1	22
GO:1905475	regulation of protein localization to membrane	22/468	181/17913	2.17474e-09	2.03094e-08	8.38129e-09	AKT1/BCL2/TGFB1/SLC7A11/CDH2/MAPK8/E2F1/TP53/ERBB2/AR/VPS4A/EGFR/PDPK1/GPC6/PRKCE/MMP14/CASP8/TNF/IFNG/CRKL/ITGB1/NKD2	22
GO:1902275	regulation of chromatin organization	21/468	165/17913	2.17992e-09	2.03209e-08	8.38605e-09	TWIST1/SNAI2/KDM1A/TGFB1/VEGFA/MAPK3/MAPK8/CTNNB1/CCNB1/TP53/ATG5/SIRT1/DNMT1/IWS1/MORC2/SNCA/UBE2B/KMT2A/SMAD4/MIR182/ATM	21
GO:0001819	positive regulation of cytokine production	36/468	446/17913	2.18552e-09	2.03364e-08	8.39243e-09	TWIST1/STAT3/CARD8/TGFB1/MAPK3/C5/MIR21/RUNX1/MIR17/CTNNB1/SMAD3/IL33/MIR149/IL10/DHX36/HIF1A/SETD2/NOP53/PTGS2/IL6/NFKB1/MIR206/MAPK14/HMGB1/CD36/MIR155/SERPINE1/C1QBP/MIR182/TNF/IFNG/CREB1/EP300/FZD5/WNT5A/MIR132	36
GO:0016572	histone phosphorylation	11/468	38/17913	2.19245e-09	2.03641e-08	8.40388e-09	TWIST1/CDK1/CDK2/MAPK3/CCNB1/HMGA2/PRKAA1/DRD1/UBE2B/AURKA/ATM	11
GO:0051155	positive regulation of striated muscle cell differentiation	14/468	69/17913	2.36556e-09	2.18931e-08	9.03485e-09	BCL2/MIR199A1/TGFB1/MIR204/MIR19A/MAML1/MEF2C/MIR19B1/MIR206/MAPK14/MMP14/BMP4/MTOR/MIR1-1	14
GO:0071479	cellular response to ionizing radiation	14/468	69/17913	2.36556e-09	2.18931e-08	9.03485e-09	SNAI2/KDM1A/CDKN1A/TGFB1/TP53/YAP1/SIRT1/NUCKS1/HMGA2/SFRP1/MAPK14/MDM2/HSPA5/ATM	14
GO:0009952	anterior/posterior pattern specification	22/468	182/17913	2.41479e-09	2.23087e-08	9.20638e-09	SMAD2/GLI2/CTNNB1/SMAD3/FOXA2/FOXF1/FEZF1/TP53/HOXA10/HOXA11/HOXA9/ZEB2/SFRP1/BMP4/AURKA/SMAD4/EP300/ATM/CRKL/FZD5/WNT5A/HES1	22
GO:0015918	sterol transport	17/468	107/17913	2.4617e-09	2.27013e-08	9.3684e-09	MIR144/MIR33A/MIR130B/MIR17/ANXA2/SIRT1/MIR148A/CAV1/VPS4A/MIR19B1/NFKB1/MIR128-1/ABCA1/CD36/MIR302A/PTCH1/MIR27B	17
GO:1903038	negative regulation of leukocyte cell-cell adhesion	18/468	121/17913	2.48879e-09	2.29102e-08	9.45459e-09	AKT1/CASP3/SMAD7/TGFB1/MIR21/RUNX1/MIR222/IL10/MIR221/ERBB2/RUNX3/SDC4/MIR31/HMGB1/BMP4/MIR155/MIR146A/MIR141	18
GO:2001243	negative regulation of intrinsic apoptotic signaling pathway	16/468	94/17913	2.57964e-09	2.37042e-08	9.78225e-09	AKT1/BCL2/MMP9/SNAI1/SNAI2/KDM1A/MIR21/MIR17/CD44/HIF1A/SIRT1/PTGS2/CCAR2/MDM2/NFE2L2/MIR132	16
GO:0048546	digestive tract morphogenesis	12/468	48/17913	2.60873e-09	2.39288e-08	9.87496e-09	BCL2/SMAD2/GLI2/CTNNB1/SMAD3/FOXF1/HIF1A/EGFR/SFRP1/BMP4/SOX11/WNT5A	12
GO:0071248	cellular response to metal ion	21/468	167/17913	2.72018e-09	2.49068e-08	1.02786e-08	AKT1/PARP1/MMP9/CDH1/CDKN1B/MAPK1/MAPK3/MAPK8/CCNB1/PTGS2/EGFR/MEF2C/MAPK9/PRKAA1/SNCA/NFE2L2/FABP4/FUS/HSPA5/CREB1/WNT5A	21
GO:0050768	negative regulation of neurogenesis	27/468	271/17913	2.84115e-09	2.59683e-08	1.07166e-08	VIM/PTEN/SOX2/STAT3/TGFB1/TERT/MIR181B1/MIR219A1/MIR210/CTNNB1/GSK3B/TP53/EIF4E/MIR137/NTRK3/FOXO3/NOTCH1/IL6/LPAR1/PTK2/MDM2/MIR146A/NOTCH3/SOX11/TNF/WNT5A/HES1	27
GO:0051493	regulation of cytoskeleton organization	37/468	472/17913	2.88076e-09	2.62838e-08	1.08468e-08	AFAP1/NES/CDKN1B/TGFB1/MAPK1/MAPK3/CDC42/BST2/MIR21/MIR20A/CTNNB1/GSK3B/SMAD3/MIR149/SDC4/NTRK3/MEF2C/ACTR2/PRKAA1/LPAR1/PRKCE/SFRP1/FSD1/SNCA/PTK2/PXN/MAPT/MIR214/AURKA/FSCN1/MTOR/SMAD4/MIR138-1/NOTCH2/WASL/LATS1/MIR1-1	37
GO:0014033	neural crest cell differentiation	14/468	70/17913	2.88719e-09	2.62959e-08	1.08518e-08	TWIST1/SNAI2/MAPK1/MAPK3/FN1/HIF1A/MEF2C/ZEB2/SFRP1/BMP4/LRP6/SMAD4/SOX11/HES1	14
GO:0060326	cell chemotaxis	26/468	253/17913	2.91198e-09	2.64743e-08	1.09254e-08	ABCC1/VEGFA/MAPK3/C5/FGFR1/MIR424/KIT/MIR34A/IL10/FGF1/NOTCH1/IL6/CXCR4/CSF1/LPAR1/MAPK14/HMGB1/CCL2/RAC2/KDR/SERPINE1/C1QBP/TGFB2/CRKL/PDGFB/WNT5A	26
GO:0051961	negative regulation of nervous system development	28/468	290/17913	2.91705e-09	2.64743e-08	1.09254e-08	VIM/PTEN/SOX2/STAT3/TGFB1/TERT/MIR181B1/MIR219A1/MIR210/CTNNB1/GSK3B/TP53/EIF4E/MIR137/NTRK3/FOXO3/NOTCH1/IL6/LPAR1/PTK2/MDM2/MIR146A/NOTCH3/SOX11/TNF/SUFU/WNT5A/HES1	28
GO:0010874	regulation of cholesterol efflux	11/468	39/17913	2.98255e-09	2.70212e-08	1.11511e-08	MIR144/MIR33A/MIR130B/SIRT1/MIR148A/MIR19B1/MIR128-1/ABCA1/MIR302A/PTCH1/MIR27B	11
GO:0010830	regulation of myotube differentiation	13/468	59/17913	3.03173e-09	2.73705e-08	1.12953e-08	BCL2/BDNF/SIK1/MIR200B/RBM38/MAML1/NOTCH1/MIR206/MAPK14/MMP14/HDAC4/MTOR/MIR1-1	13
GO:0061900	glial cell activation	13/468	59/17913	3.03173e-09	2.73705e-08	1.12953e-08	MIR181B1/IL33/EGFR/IL6/MIR128-1/SNCA/MIR124-1/MIR142/MAPT/MIR155/TNF/IFNG/ATM	13
GO:0045603	positive regulation of endothelial cell differentiation	9/468	23/17913	3.1012e-09	2.79488e-08	1.15339e-08	MIR21/MIR181B1/CTNNB1/MIR34A/MIR150/MIR200C/CLDN5/CDH5/BMP4	9
GO:0050729	positive regulation of inflammatory response	20/468	153/17913	3.29586e-09	2.96285e-08	1.22271e-08	MIR21/PDCD4/MIR181B1/MIR17/NUPR1/IL33/MIR126/PTGS2/EGFR/IL6/MIR128-1/NEAT1/MIR206/SNCA/MIR142/MIR155/FABP4/SERPINE1/TNF/WNT5A	20
GO:0072009	nephron epithelium development	17/468	109/17913	3.29908e-09	2.96285e-08	1.22271e-08	BCL2/MYC/TGFB1/VEGFA/CTNNB1/FGF1/YAP1/HOXA11/MEF2C/POU3F3/BMP4/SMAD4/PTCH1/PROM1/HOXB7/WNT6/HES1	17
GO:2001252	positive regulation of chromosome organization	21/468	169/17913	3.38275e-09	3.03271e-08	1.25154e-08	SNAI2/KDM1A/TGFB1/VEGFA/MAPK1/MAPK3/CTNNB1/CCNB1/TP53/DHX36/SIRT1/RB1/DNMT1/MORC2/SFPQ/CCT4/KMT2A/CDT1/SMAD4/HNRNPA2B1/ATM	21
GO:0010675	regulation of cellular carbohydrate metabolic process	19/468	138/17913	3.39345e-09	3.03702e-08	1.25332e-08	AKT1/STAT3/ADIPOR1/WDR5/MIR210/GSK3B/TFF3/FOXO1/FOXA2/SIK1/MIR107/NUPR1/TP53/SIRT1/PRKCE/SNCA/HDAC4/MTOR/EP300	19
GO:0002718	regulation of cytokine production involved in immune response	15/468	83/17913	3.44654e-09	3.07919e-08	1.27072e-08	SMAD7/TGFB1/MAPK3/BST2/IL10/ATG5/DHX36/IL6/MAPK14/CD36/MIR155/TNF/TGFB2/FZD5/WNT5A	15
GO:0001707	mesoderm formation	14/468	71/17913	3.5115e-09	3.1318e-08	1.29243e-08	SMAD2/SNAI1/FGFR1/MIR145/SMAD3/FOXF1/HOXA11/HMGA2/MIR150/MIR200C/BMP4/WNT5A/MIR1-1/ITGB1	14
GO:0030900	forebrain development	32/468	371/17913	3.54818e-09	3.15905e-08	1.30368e-08	BAX/CASP3/PTEN/SOX2/EZH2/KDM1A/CDH1/SLC7A11/CDH2/GLI2/FGFR1/CTNNB1/GSK3B/CDK6/FEZF1/E2F1/APAF1/HIF1A/SETD2/EGFR/POU3F3/ZEB2/CXCR4/DRD1/LPAR1/ROBO1/BMP4/NOTCH3/CREB1/CRKL/WNT5A/HES1	32
GO:0002685	regulation of leukocyte migration	22/468	186/17913	3.64375e-09	3.23854e-08	1.33648e-08	AKT1/TGFB1/VEGFA/MAPK3/C5/MIR24-1/IL33/HOXA7/IL6/CSF1/MAPK14/MMP14/HMGB1/CCL2/RAC2/SERPINE1/C1QBP/WASL/TNF/BCR/CRKL/WNT5A	22
GO:0003205	cardiac chamber development	21/468	170/17913	3.76756e-09	3.34282e-08	1.37952e-08	SMAD7/TGFB1/RBM15/SOX4/FOXF1/TP53/HIF1A/MAML1/MEF2C/NOTCH1/ROBO1/MDM2/BMP4/SMAD4/SOX11/NOTCH2/TGFB2/SUFU/WNT5A/MIR1-1/HES1	21
GO:1902893	regulation of pri-miRNA transcription by RNA polymerase II	11/468	40/17913	4.01793e-09	3.55884e-08	1.46866e-08	STAT3/TGFB1/TERT/SMAD3/TP53/IL10/HIF1A/BMP4/HDAC4/TGFB2/PDGFB	11
GO:0010975	regulation of neuron projection development	36/468	458/17913	4.42621e-09	3.91374e-08	1.61512e-08	VIM/AKT1/PTEN/EZH2/KDM1A/VEGFA/BDNF/FGFR1/MIR219A1/MIR210/GSK3B/MIR222/MIR221/FN1/ATF1/DHX36/NTRK3/MEF2C/ZEB2/ACTR2/CXCR4/MIR200C/LPAR1/ROBO1/MAP2K1/SFRP1/PTK2/MAPT/MDM2/NFE2L2/MAPK6/MTOR/HSPA5/EP300/CRKL/WNT5A	36
GO:0034504	protein localization to nucleus	24/468	223/17913	4.77703e-09	4.21671e-08	1.74015e-08	AKT1/PARP1/CDH1/CDKN1A/CDK1/STAT3/TGFB1/MAPK1/TERT/ZBTB7A/GSK3B/SMAD3/TP53/NOP53/PTGS2/CCT4/DRD1/MAPK14/CD36/MDM2/BMP4/MIR155/IFNG/SUFU	24
GO:0003299	muscle hypertrophy in response to stress	10/468	32/17913	5.18797e-09	4.55605e-08	1.88019e-08	EZH2/MIR199A1/MIR17/MIR20A/SMAD3/FOXO1/MEF2C/MIR214/HDAC4/MIR155	10
GO:0014887	cardiac muscle adaptation	10/468	32/17913	5.18797e-09	4.55605e-08	1.88019e-08	EZH2/MIR199A1/MIR17/MIR20A/SMAD3/FOXO1/MEF2C/MIR214/HDAC4/MIR155	10
GO:0014898	cardiac muscle hypertrophy in response to stress	10/468	32/17913	5.18797e-09	4.55605e-08	1.88019e-08	EZH2/MIR199A1/MIR17/MIR20A/SMAD3/FOXO1/MEF2C/MIR214/HDAC4/MIR155	10
GO:0043696	dedifferentiation	7/468	12/17913	5.62022e-09	4.91889e-08	2.02993e-08	MIR145/CDK6/FEZF1/MIR221/MIR214/MIR182/PDGFB	7
GO:0043697	cell dedifferentiation	7/468	12/17913	5.62022e-09	4.91889e-08	2.02993e-08	MIR145/CDK6/FEZF1/MIR221/MIR214/MIR182/PDGFB	7
GO:1902106	negative regulation of leukocyte differentiation	16/468	99/17913	5.63675e-09	4.925e-08	2.03245e-08	MYC/SMAD7/MIR21/RUNX1/CTNNB1/CDK6/ERBB2/RUNX3/MIR125B1/HOXA7/SFRP1/HMGB1/BMP4/MIR155/FBXW7/CUL4A	16
GO:0038034	signal transduction in absence of ligand	13/468	62/17913	5.79464e-09	5.04584e-08	2.08232e-08	AKT1/BCL2/CASP3/CASP9/SNAI2/TERT/FGFR1/GSK3B/MKNK2/FOXO3/MCL1/WWOX/TNF	13
GO:0097192	extrinsic apoptotic signaling pathway in absence of ligand	13/468	62/17913	5.79464e-09	5.04584e-08	2.08232e-08	AKT1/BCL2/CASP3/CASP9/SNAI2/TERT/FGFR1/GSK3B/MKNK2/FOXO3/MCL1/WWOX/TNF	13
GO:0003279	cardiac septum development	17/468	113/17913	5.80873e-09	5.04958e-08	2.08386e-08	SMAD7/RBM15/SOX4/TP53/MAML1/NOTCH1/ROBO1/MDM2/BMP4/SMAD4/SOX11/NOTCH2/TGFB2/SUFU/WNT5A/MIR1-1/HES1	17
GO:0007498	mesoderm development	18/468	128/17913	6.24749e-09	5.41274e-08	2.23373e-08	SMAD2/SNAI1/VEGFA/FGFR1/MIR145/SMAD3/FOXF1/YAP1/SETD2/HOXA11/HMGA2/MIR150/MIR200C/BMP4/SMAD4/WNT5A/MIR1-1/ITGB1	18
GO:0072175	epithelial tube formation	18/468	128/17913	6.24749e-09	5.41274e-08	2.23373e-08	TWIST1/TGFB1/SOX4/CTNNB1/APAF1/HIF1A/SETD2/SDC4/ZEB2/CTHRC1/SFRP1/BMP4/PTCH1/SOX11/TGFB2/SUFU/WNT5A/WNT6	18
GO:0031330	negative regulation of cellular catabolic process	25/468	244/17913	6.26392e-09	5.41787e-08	2.23585e-08	AKT1/BCL2/STAT3/MIR199A1/MIR21/TIMP3/NUPR1/E2F1/TP53/ANXA2/YBX1/IL10/DHX36/NOP53/HERC1/SNCA/MAPK14/PTK2/CCAR2/HDAC4/MTOR/MIR146A/MCL1/SUFU/ATG7	25
GO:0001841	neural tube formation	16/468	100/17913	6.55147e-09	5.64763e-08	2.33067e-08	TWIST1/TGFB1/SOX4/APAF1/HIF1A/SETD2/SDC4/ZEB2/CTHRC1/SFRP1/BMP4/PTCH1/SOX11/TGFB2/SUFU/WNT5A	16
GO:0046822	regulation of nucleocytoplasmic transport	16/468	100/17913	6.55147e-09	5.64763e-08	2.33067e-08	CDH1/TGFB1/MAPK1/GSK3B/SMAD3/TP53/SETD2/IWS1/PTGS2/MAPK14/CD36/MDM2/BMP4/IFNG/RBM4/SUFU	16
GO:0050730	regulation of peptidyl-tyrosine phosphorylation	25/468	245/17913	6.8093e-09	5.86009e-08	2.41834e-08	STAT3/TGFB1/VEGFA/BDNF/KIT/CD44/TP53/MIR221/CAV1/MIR106B/MIR19A/EGFR/CADM4/MIR19B1/IL6/PRKCE/SFRP1/CD36/MTOR/MIR146A/FBXW7/TNF/IFNG/PDGFB/HES1	25
GO:0042542	response to hydrogen peroxide	19/468	144/17913	6.97745e-09	5.9867e-08	2.4706e-08	BCL2/CASP3/EZH2/KLF2/CDK1/MIR21/MIR17/PCNA/FOXO1/MIR107/MIR34A/IL10/SIRT1/FOXO3/IL6/PRKAA1/MDM2/NFE2L2/MIR155	19
GO:0031667	response to nutrient levels	36/468	466/17913	6.97965e-09	5.9867e-08	2.4706e-08	AKT1/BCL2/PTEN/CCND1/SNAI2/CDKN1A/CDKN2B/TGFB1/MAPK1/MAPK3/MAPK8/PCNA/FOXO1/FOXA2/TP53/APAF1/SIRT1/MIR125B1/NNT/PTGS2/EGFR/FOXO3/PRKAA1/ABCA1/STC1/SFRP1/MDM2/NFE2L2/MTOR/SH3GLB1/HSPA5/PKM/CREB1/FAS/ATG7/TYMS	36
GO:1905065	positive regulation of vascular smooth muscle cell differentiation	8/468	18/17913	7.11242e-09	6.09045e-08	2.51341e-08	MIR21/MIR424/MIR145/KIT/MIR125B1/MIR140/MIR124-1/MIR1-1	8
GO:0045736	negative regulation of cyclin-dependent protein serine/threonine kinase activity	10/468	33/17913	7.27109e-09	6.20571e-08	2.56097e-08	CASP3/PTEN/LATS2/CDKN1A/CDKN1B/CDKN2B/CDKN2A/CDKN1C/CDKN2C/LATS1	10
GO:1901797	negative regulation of signal transduction by p53 class mediator	10/468	33/17913	7.27109e-09	6.20571e-08	2.56097e-08	TWIST1/BCL2/SNAI1/SNAI2/KDM1A/MIR21/CD44/SIRT1/NOP53/MDM2	10
GO:0031016	pancreas development	14/468	75/17913	7.43399e-09	6.33425e-08	2.61402e-08	AKT1/SMAD2/SOX4/CTNNB1/GSK3B/FOXO1/CDK6/FOXA2/FOXF1/IL6/PDPK1/BMP4/WNT5A/HES1	14
GO:0097306	cellular response to alcohol	15/468	88/17913	7.97572e-09	6.78462e-08	2.79988e-08	AKT1/PTEN/KLF2/CDH1/CTNNB1/FOXO3/PRKAA1/ABCA1/PRKCE/SFRP1/CDK4/LRP6/PTCH1/MIR182/MIR96	15
GO:0050921	positive regulation of chemotaxis	18/468	130/17913	8.0318e-09	6.82108e-08	2.81493e-08	TGFB1/VEGFA/MAPK3/FGFR1/SMAD3/NTRK3/IL6/CXCR4/CSF1/LPAR1/MAPK14/HMGB1/RAC2/KDR/SERPINE1/C1QBP/PDGFB/WNT5A	18
GO:0071356	cellular response to tumor necrosis factor	26/468	266/17913	8.37187e-09	7.09819e-08	2.92929e-08	AKT1/KLF2/CARD8/ABCC2/MAPK1/MAPK3/MIR24-1/MIR181B1/MIR152/MIR34A/SIRT1/LTBR/FOXO3/NFKB1/MIR31/ADAMTS12/SFRP1/OCLN/MAPK14/CCL2/CASP8/NFE2L2/HDAC4/FABP4/HAS2/TNF	26
GO:0003281	ventricular septum development	14/468	76/17913	8.89778e-09	7.51935e-08	3.10309e-08	SMAD7/RBM15/SOX4/NOTCH1/ROBO1/MDM2/BMP4/SMAD4/SOX11/TGFB2/SUFU/WNT5A/MIR1-1/HES1	14
GO:0014015	positive regulation of gliogenesis	14/468	76/17913	8.89778e-09	7.51935e-08	3.10309e-08	TGFB1/E2F1/MIR222/MIR221/MIR125B1/NOTCH1/IL6/CXCR4/CSF1/MIR142/MTOR/TNF/CRKL/HES1	14
GO:0003231	cardiac ventricle development	18/468	131/17913	9.09e-09	7.66922e-08	3.16494e-08	SMAD7/TGFB1/RBM15/SOX4/FOXF1/HIF1A/MEF2C/NOTCH1/ROBO1/MDM2/BMP4/SMAD4/SOX11/TGFB2/SUFU/WNT5A/MIR1-1/HES1	18
GO:0006914	autophagy	36/468	471/17913	9.22382e-09	7.75674e-08	3.20105e-08	AKT1/BCL2/CASP3/STAT3/MIR199A1/MAPK3/MAPK8/CLN3/GSK3B/FOXO1/NUPR1/TP53/IL10/ATG5/HIF1A/SIRT1/VPS4A/PIK3CB/FOXO3/HERC1/PRKAA1/SNCA/PTK2/HMGB1/MAPT/ATG3/KDR/MTOR/MCL1/SH3GLB1/FBXW7/IFNG/EP300/ATM/FZD5/ATG7	36
GO:0061919	process utilizing autophagic mechanism	36/468	471/17913	9.22382e-09	7.75674e-08	3.20105e-08	AKT1/BCL2/CASP3/STAT3/MIR199A1/MAPK3/MAPK8/CLN3/GSK3B/FOXO1/NUPR1/TP53/IL10/ATG5/HIF1A/SIRT1/VPS4A/PIK3CB/FOXO3/HERC1/PRKAA1/SNCA/PTK2/HMGB1/MAPT/ATG3/KDR/MTOR/MCL1/SH3GLB1/FBXW7/IFNG/EP300/ATM/FZD5/ATG7	36
GO:0010613	positive regulation of cardiac muscle hypertrophy	11/468	43/17913	9.31402e-09	7.80712e-08	3.22185e-08	PARP1/MIR199A1/MIR21/MIR17/MIR20A/MIR19A/MIR19B1/PTK2/MIR214/MIR155/MTOR	11
GO:0031018	endocrine pancreas development	11/468	43/17913	9.31402e-09	7.80712e-08	3.22185e-08	AKT1/SOX4/GSK3B/FOXO1/CDK6/FOXA2/IL6/PDPK1/BMP4/WNT5A/HES1	11
GO:1900180	regulation of protein localization to nucleus	17/468	117/17913	9.97663e-09	8.34895e-08	3.44545e-08	AKT1/PARP1/CDH1/CDK1/TGFB1/MAPK1/TERT/GSK3B/SMAD3/PTGS2/CCT4/MAPK14/CD36/BMP4/MIR155/IFNG/SUFU	17
GO:1904030	negative regulation of cyclin-dependent protein kinase activity	10/468	34/17913	1.0062e-08	8.40675e-08	3.4693e-08	CASP3/PTEN/LATS2/CDKN1A/CDKN1B/CDKN2B/CDKN2A/CDKN1C/CDKN2C/LATS1	10
GO:0007548	sex differentiation	26/468	269/17913	1.05759e-08	8.82179e-08	3.64058e-08	BAX/BCL2/CASP3/CCND1/VEGFA/KIT/CTNNB1/NUPR1/AR/SIRT1/ARID4A/HOXA10/HOXA11/HOXA9/TNFSF10/FOXO3/SFRP1/MMP14/SMAD4/TESC/HSPA5/IDH1/TGFB2/ATM/CRKL/WNT5A	26
GO:0030279	negative regulation of ossification	14/468	77/17913	1.06187e-08	8.83818e-08	3.64735e-08	TWIST1/BCL2/TGFB1/SMAD3/CDK6/HIF1A/MEF2C/NOTCH1/SFRP1/HDAC4/PTCH1/MIR138-1/TNF/SUFU	14
GO:0030858	positive regulation of epithelial cell differentiation	13/468	65/17913	1.06641e-08	8.83818e-08	3.64735e-08	MIR21/MIR181B1/CTNNB1/MIR34A/MIR150/ZEB2/MIR200C/CLDN5/CDH5/BMP4/SERPINE1/PTCH1/PROM1	13
GO:0045428	regulation of nitric oxide biosynthetic process	13/468	65/17913	1.06641e-08	8.83818e-08	3.64735e-08	AKT1/KLF2/MIR199A1/MIR181B1/SMAD3/IL10/CAV1/PTGS2/CD36/MTOR/TNF/IFNG/MIR132	13
GO:1904888	cranial skeletal system development	13/468	65/17913	1.06641e-08	8.83818e-08	3.64735e-08	TWIST1/SMAD2/RUNX2/TGFB1/CTNNB1/SMAD3/SETD2/HOXA1/MEF2C/MMP14/BMP4/TGFB2/CRKL	13
GO:1904754	positive regulation of vascular associated smooth muscle cell migration	9/468	26/17913	1.10579e-08	9.1498e-08	3.77594e-08	TERT/MIR21/MIR143/MIR20A/MIR135B/MIR221/MDM2/MIR448/PDGFB	9
GO:0043280	positive regulation of cysteine-type endopeptidase activity involved in apoptotic process	17/468	118/17913	1.13794e-08	9.40074e-08	3.8795e-08	BAX/CASP9/MYC/CARD8/SMAD3/APAF1/SIRT1/TNFRSF10B/TNFSF10/TNFRSF10A/ROBO1/SNCA/HMGB1/MAPT/CASP8/TNF/FAS	17
GO:1905330	regulation of morphogenesis of an epithelium	21/468	181/17913	1.16974e-08	9.64805e-08	3.98156e-08	PTEN/SNAI2/TGFB1/VEGFA/CDC42/MIR21/FGFR1/CTNNB1/MIR221/FGF1/AR/CTHRC1/ADAMTS12/GPC6/SFRP1/BMP4/MTOR/TNF/HOXB7/FZD5/WNT5A	21
GO:1900409	positive regulation of cellular response to oxidative stress	8/468	19/17913	1.20052e-08	9.8861e-08	4.0798e-08	MIR17/MIR34A/MMP3/FOXO3/SFPQ/MCL1/FBXW7/TNF	8
GO:0014742	positive regulation of muscle hypertrophy	11/468	44/17913	1.21293e-08	9.9723e-08	4.11537e-08	PARP1/MIR199A1/MIR21/MIR17/MIR20A/MIR19A/MIR19B1/PTK2/MIR214/MIR155/MTOR	11
GO:0030217	T cell differentiation	24/468	234/17913	1.23833e-08	1.01649e-07	4.19487e-08	BCL2/ZEB1/STAT3/RUNX2/SMAD7/TGFB1/GLI2/SOX4/MIR21/RUNX1/KIT/CTNNB1/CDK6/TP53/ATG5/ERBB2/RUNX3/IL6/HMGB1/BMP4/MIR155/MTOR/IFNG/FZD5	24
GO:0042632	cholesterol homeostasis	15/468	91/17913	1.28284e-08	1.04969e-07	4.33188e-08	MIR144/MIR34A/SIRT1/MIR148A/CAV1/MIR19B1/MIR590/MIR128-1/ABCA1/MIR155/MIR302A/FABP4/MIR182/MIR27B/MIR132	15
GO:1901655	cellular response to ketone	15/468	91/17913	1.28284e-08	1.04969e-07	4.33188e-08	AKT1/CASP9/KLF2/ABCC2/TGFB1/FOXO1/EIF4E/AR/SIRT1/EGFR/FOXO3/PRKAA1/PRKCE/SFRP1/CDK4	15
GO:0060675	ureteric bud morphogenesis	13/468	66/17913	1.29677e-08	1.05941e-07	4.37197e-08	BCL2/MYC/TGFB1/VEGFA/CTNNB1/FGF1/HOXA11/BMP4/SMAD4/PTCH1/HOXB7/WNT6/HES1	13
GO:0010984	regulation of lipoprotein particle clearance	10/468	35/17913	1.37604e-08	1.12239e-07	4.63188e-08	MIR199A1/MIR144/MIR33A/MIR17/ANXA2/MIR148A/MIR128-1/MIR155/MIR302A/MIR27B	10
GO:0010332	response to gamma radiation	12/468	55/17913	1.39168e-08	1.13335e-07	4.67712e-08	BAX/BCL2/PARP1/MYC/KDM1A/CDKN1A/TP53/YAP1/PRKAA1/MDM2/HSPA5/ATM	12
GO:0055092	sterol homeostasis	15/468	92/17913	1.49653e-08	1.21681e-07	5.02156e-08	MIR144/MIR34A/SIRT1/MIR148A/CAV1/MIR19B1/MIR590/MIR128-1/ABCA1/MIR155/MIR302A/FABP4/MIR182/MIR27B/MIR132	15
GO:0002065	columnar/cuboidal epithelial cell differentiation	16/468	106/17913	1.5546e-08	1.26204e-07	5.20821e-08	CDKN1A/CDH2/SOX4/FGFR1/GSK3B/CDK6/HOXA5/HIF1A/MIR29B1/PDPK1/BMP4/SERPINE1/SOX11/WNT5A/HES1/TYMS	16
GO:0001974	blood vessel remodeling	11/468	45/17913	1.56793e-08	1.27086e-07	5.24461e-08	BAX/TGFB1/MIR143/MIR17/MIR20A/ATG5/MIR29B1/MEF2C/MDM2/BCR/EPAS1	11
GO:0072171	mesonephric tubule morphogenesis	13/468	67/17913	1.57115e-08	1.27147e-07	5.24711e-08	BCL2/MYC/TGFB1/VEGFA/CTNNB1/FGF1/HOXA11/BMP4/SMAD4/PTCH1/HOXB7/WNT6/HES1	13
GO:0090101	negative regulation of transmembrane receptor protein serine/threonine kinase signaling pathway	17/468	121/17913	1.6745e-08	1.35298e-07	5.5835e-08	SMAD2/SMAD7/TGFB1/MIR20A/ZBTB7A/SMAD3/TP53/SIRT1/CAV1/MIR15B/MIR29B1/NOTCH1/PDPK1/BMPER/SFRP1/HSPA5/WNT5A	17
GO:0003156	regulation of animal organ formation	10/468	36/17913	1.86115e-08	1.50113e-07	6.19487e-08	FGFR1/MIR20A/CTNNB1/FGF1/AR/HOXA11/ROBO1/BMP4/WNT5A/HES1	10
GO:0008584	male gonad development	18/468	137/17913	1.86367e-08	1.50113e-07	6.19487e-08	BAX/BCL2/CCND1/KIT/NUPR1/AR/ARID4A/HOXA10/HOXA11/HOXA9/TNFSF10/SFRP1/MMP14/SMAD4/TESC/TGFB2/CRKL/WNT5A	18
GO:0002088	lens development in camera-type eye	13/468	68/17913	1.89686e-08	1.52548e-07	6.29537e-08	VIM/CDKN1B/TGFB1/SLC7A11/CTNNB1/SMAD3/CDKN1C/NTRK3/ZEB2/BMP4/CDK4/SOX11/WNT5A	13
GO:0090370	negative regulation of cholesterol efflux	8/468	20/17913	1.9553e-08	1.57003e-07	6.47921e-08	MIR144/MIR33A/MIR130B/MIR148A/MIR19B1/MIR128-1/MIR302A/MIR27B	8
GO:0045778	positive regulation of ossification	15/468	94/17913	2.02397e-08	1.62264e-07	6.69631e-08	RUNX2/TGFB1/MIR21/MIR210/CTNNB1/SMAD3/MIR29B1/MEF2C/IL6/MIR200C/CTHRC1/BMP4/SOX11/TGFB2/WNT5A	15
GO:0046546	development of primary male sexual characteristics	18/468	138/17913	2.09232e-08	1.67483e-07	6.91171e-08	BAX/BCL2/CCND1/KIT/NUPR1/AR/ARID4A/HOXA10/HOXA11/HOXA9/TNFSF10/SFRP1/MMP14/SMAD4/TESC/TGFB2/CRKL/WNT5A	18
GO:0046686	response to cadmium ion	12/468	57/17913	2.13974e-08	1.70749e-07	7.04648e-08	AKT1/MMP9/CDK1/CDKN1B/MAPK1/MAPK3/MAPK8/TERT/PCNA/KIT/EGFR/MAPK9	12
GO:2000756	regulation of peptidyl-lysine acetylation	12/468	57/17913	2.13974e-08	1.70749e-07	7.04648e-08	TWIST1/SNAI2/TGFB1/MAPK3/SOX4/ATG5/SIRT1/IWS1/PRKAA1/SNCA/KMT2A/SMAD4	12
GO:0032386	regulation of intracellular transport	32/468	400/17913	2.17019e-08	1.72911e-07	7.13568e-08	CDH1/TGFB1/MAPK1/MAPK3/MIR17/GSK3B/SMAD3/FOXF1/TP53/ANXA2/ERBB2/SETD2/IWS1/PTGS2/PDPK1/PRKAA1/DRD1/MAP2K1/MAP2K2/MAPK14/RAP1B/CD36/MDM2/BMP4/RAC2/SH3GLB1/FBXW7/IFNG/RBM4/FZD5/SUFU/MIR27B	32
GO:0090399	replicative senescence	7/468	14/17913	2.32713e-08	1.84559e-07	7.61639e-08	CDKN1A/TERT/MIR21/CDKN2A/TP53/SERPINE1/ATM	7
GO:1905049	negative regulation of metallopeptidase activity	7/468	14/17913	2.32713e-08	1.84559e-07	7.61639e-08	MIR24-1/MIR152/TIMP3/MIR195/MIR29B1/TIMP2/MIR29C	7
GO:1905050	positive regulation of metallopeptidase activity	7/468	14/17913	2.32713e-08	1.84559e-07	7.61639e-08	MIR205/STAT3/MAPK3/MIR21/MIR17/MIR29B1/MAPK14	7
GO:2000108	positive regulation of leukocyte apoptotic process	9/468	28/17913	2.33325e-08	1.8476e-07	7.6247e-08	BAX/CDKN2A/TP53/IL10/SIRT1/PIK3CB/MEF2C/MIR155/WNT5A	9
GO:2000060	positive regulation of ubiquitin-dependent protein catabolic process	14/468	82/17913	2.46697e-08	1.94751e-07	8.03698e-08	AKT1/PTEN/SMAD7/GSK3B/IL33/CAV1/NOP53/MAPK9/PTK2/MDM2/NFE2L2/AURKA/FBXW7/NKD2	14
GO:2000106	regulation of leukocyte apoptotic process	14/468	82/17913	2.46697e-08	1.94751e-07	8.03698e-08	BAX/PTEN/SLC7A11/BIRC7/CDKN2A/TP53/IL10/HIF1A/SIRT1/PIK3CB/MEF2C/BMP4/MIR155/WNT5A	14
GO:1905314	semi-lunar valve development	10/468	37/17913	2.49139e-08	1.96378e-07	8.10414e-08	TWIST1/SNAI1/SNAI2/TGFB1/RB1/NOTCH1/ROBO1/BMP4/NOTCH2/TGFB2	10
GO:0071383	cellular response to steroid hormone stimulus	24/468	243/17913	2.58325e-08	2.03308e-07	8.39013e-08	PAGR1/CASP9/PARP1/ABCC2/TGFB1/RUNX1/ZBTB7A/CTNNB1/FOXO1/CCNE1/EIF4E/YAP1/AR/SIRT1/RB1/EGFR/FOXO3/HNF4G/STC1/SFRP1/BMP4/ESRRA/LATS1/EP300	24
GO:0010811	positive regulation of cell-substrate adhesion	16/468	110/17913	2.67412e-08	2.10139e-07	8.67203e-08	VEGFA/CDC42/GSK3B/SMAD3/CDK6/FOXF1/FN1/SDC4/CSF1/PRKCE/SFRP1/CD36/KDR/C1QBP/HAS2/CRKL	16
GO:0051170	import into nucleus	17/468	125/17913	2.75095e-08	2.15847e-07	8.90758e-08	AKT1/CDH1/CDKN1A/STAT3/TGFB1/GEMIN2/MAPK1/SMAD3/TP53/PTGS2/SMN1/DRD1/MAPK14/CD36/BMP4/IFNG/SUFU	17
GO:0001654	eye development	29/468	342/17913	2.84821e-08	2.23139e-07	9.2085e-08	TWIST1/VIM/BAX/BCL2/NES/SOX2/ZEB1/STAT3/CDKN1B/TGFB1/VEGFA/SLC7A11/CTNNB1/SMAD3/CDKN1C/HIF1A/CACNA1C/NTRK3/EGFR/ZEB2/BMP4/CDK4/COL4A1/PROM1/SOX11/TGFB2/FZD5/WNT5A/WNT6	29
GO:0021782	glial cell development	16/468	111/17913	3.05054e-08	2.38627e-07	9.84767e-08	VIM/AKT1/PTEN/TGFB1/SOX4/MIR181B1/CDK6/NTRK3/EGFR/IL6/DRD1/LPAR1/MIR142/MAPT/SOX11/TNF	16
GO:1902884	positive regulation of response to oxidative stress	8/468	21/17913	3.08665e-08	2.41086e-07	9.94916e-08	MIR17/MIR34A/MMP3/FOXO3/SFPQ/MCL1/FBXW7/TNF	8
GO:1903036	positive regulation of response to wounding	13/468	71/17913	3.27172e-08	2.55155e-07	1.05297e-07	MIR199A1/MIR21/MIR17/MIR222/MIR221/NTRK3/MIR590/CXCR4/PRKCE/CD36/NFE2L2/SERPINE1/MTOR	13
GO:0010976	positive regulation of neuron projection development	25/468	265/17913	3.29816e-08	2.56482e-07	1.05845e-07	EZH2/KDM1A/VEGFA/BDNF/FGFR1/MIR222/MIR221/FN1/ATF1/DHX36/NTRK3/ZEB2/ACTR2/CXCR4/MIR200C/LPAR1/ROBO1/MAP2K1/MAPT/NFE2L2/MAPK6/MTOR/HSPA5/EP300/WNT5A	25
GO:1902042	negative regulation of extrinsic apoptotic signaling pathway via death domain receptors	10/468	38/17913	3.30287e-08	2.56482e-07	1.05845e-07	RAF1/MIR222/MIR221/TNFRSF10B/TNFSF10/TNFRSF10A/CASP8/SERPINE1/FAIM2/FAS	10
GO:2000727	positive regulation of cardiac muscle cell differentiation	9/468	29/17913	3.30544e-08	2.56482e-07	1.05845e-07	MIR199A1/TGFB1/MIR204/MIR19A/MEF2C/MIR19B1/BMP4/MTOR/MIR1-1	9
GO:0045861	negative regulation of proteolysis	28/468	324/17913	3.30865e-08	2.56482e-07	1.05845e-07	AKT1/MMP9/BIRC5/CARD8/VEGFA/RAF1/CLN3/BST2/C5/MIR24-1/MIR152/MIR17/TIMP3/CD44/TP53/IL10/NOP53/PTGS2/MIR195/MIR29B1/MIR19B1/TIMP2/SNCA/CCAR2/MDM2/MIR29C/SERPINE1/SUFU	28
GO:0010821	regulation of mitochondrion organization	20/468	175/17913	3.37646e-08	2.61346e-07	1.07853e-07	AKT1/BAX/BCL2/MMP9/MAPK8/GSK3B/E2F1/TP53/HIF1A/TNFSF10/PRKAA1/MAPT/CASP8/RAC2/KDR/MIR155/SH3GLB1/FBXW7/FZD5/ATG7	20
GO:0150063	visual system development	29/468	346/17913	3.67599e-08	2.84104e-07	1.17244e-07	TWIST1/VIM/BAX/BCL2/NES/SOX2/ZEB1/STAT3/CDKN1B/TGFB1/VEGFA/SLC7A11/CTNNB1/SMAD3/CDKN1C/HIF1A/CACNA1C/NTRK3/EGFR/ZEB2/BMP4/CDK4/COL4A1/PROM1/SOX11/TGFB2/FZD5/WNT5A/WNT6	29
GO:0009991	response to extracellular stimulus	36/468	498/17913	3.86155e-08	2.97999e-07	1.22978e-07	AKT1/BCL2/PTEN/CCND1/SNAI2/CDKN1A/CDKN2B/TGFB1/MAPK1/MAPK3/MAPK8/PCNA/FOXO1/FOXA2/TP53/APAF1/SIRT1/MIR125B1/NNT/PTGS2/EGFR/FOXO3/PRKAA1/ABCA1/STC1/SFRP1/MDM2/NFE2L2/MTOR/SH3GLB1/HSPA5/PKM/CREB1/FAS/ATG7/TYMS	36
GO:0045216	cell-cell junction organization	17/468	128/17913	3.93965e-08	3.03386e-07	1.25202e-07	SNAI1/SNAI2/ACE2/TGFB1/RUNX1/SMAD3/TJP1/CAV1/EPB41L3/CLDN5/OCLN/CDH5/MIR155/FSCN1/TNF/TGFB2/FZD5	17
GO:0001658	branching involved in ureteric bud morphogenesis	12/468	60/17913	3.94314e-08	3.03386e-07	1.25202e-07	BCL2/MYC/TGFB1/VEGFA/CTNNB1/FGF1/HOXA11/BMP4/SMAD4/PTCH1/HOXB7/WNT6	12
GO:0046661	male sex differentiation	19/468	160/17913	4e-08	3.07302e-07	1.26818e-07	BAX/BCL2/CCND1/KIT/CTNNB1/NUPR1/AR/ARID4A/HOXA10/HOXA11/HOXA9/TNFSF10/SFRP1/MMP14/SMAD4/TESC/TGFB2/CRKL/WNT5A	19
GO:0050663	cytokine secretion	23/468	230/17913	4.01293e-08	3.07837e-07	1.27038e-07	TWIST1/CARD8/MAPK3/MIR204/C5/MIR24-1/MIR20A/IL33/MIR149/IL10/ATG5/FN1/DHX36/MIR590/ABCA1/MAPK14/HMGB1/CD36/MIR155/MIR182/TNF/FZD5/WNT5A	23
GO:0097300	programmed necrotic cell death	11/468	49/17913	4.09559e-08	3.1345e-07	1.29355e-07	BAX/MIR107/TP53/MIR221/CAV1/CASP8/MIR214/MIR155/TNF/FAS/MIR485	11
GO:0045834	positive regulation of lipid metabolic process	18/468	144/17913	4.09826e-08	3.1345e-07	1.29355e-07	TWIST1/AKT1/TGFB1/KIT/FGF1/PTGS2/MIR29B1/PRKAA1/PRKCE/PTK2/MIR183/MTOR/MIR182/TNF/IFNG/CREB1/PDGFB/MIR96	18
GO:0008593	regulation of Notch signaling pathway	15/468	99/17913	4.16075e-08	3.17758e-07	1.31133e-07	AKT1/STAT3/ZBTB7A/KIT/MIR126/EGFR/MAML1/NOTCH1/ROBO1/MMP14/NOTCH3/FBXW7/EP300/TGFB2/HES1	15
GO:0043518	negative regulation of DNA damage response, signal transduction by p53 class mediator	7/468	15/17913	4.26529e-08	3.24779e-07	1.3403e-07	TWIST1/SNAI1/SNAI2/KDM1A/CD44/SIRT1/MDM2	7
GO:1905205	positive regulation of connective tissue replacement	7/468	15/17913	4.26529e-08	3.24779e-07	1.3403e-07	MIR199A1/MIR17/MIR34A/MIR15B/MIR195/MIR214/MIR155	7
GO:1904892	regulation of STAT cascade	17/468	129/17913	4.43005e-08	3.36828e-07	1.39002e-07	STAT3/ADIPOR1/KIT/MIR149/IL10/MIR221/CAV1/MIR125B1/MIR19A/MIR19B1/NOTCH1/IL6/MIR155/MIR146A/TNF/IFNG/HES1	17
GO:1902895	positive regulation of pri-miRNA transcription by RNA polymerase II	9/468	30/17913	4.61353e-08	3.50261e-07	1.44546e-07	STAT3/TGFB1/TERT/SMAD3/TP53/IL10/HIF1A/TGFB2/PDGFB	9
GO:0090343	positive regulation of cell aging	8/468	22/17913	4.74004e-08	3.58283e-07	1.47857e-07	MIR21/CDKN2A/MIR34A/TP53/SIRT1/MIR217/HMGA2/MIR146A	8
GO:1901522	positive regulation of transcription from RNA polymerase II promoter involved in cellular response to chemical stimulus	8/468	22/17913	4.74004e-08	3.58283e-07	1.47857e-07	RUNX2/VEGFA/TP53/HIF1A/NOTCH1/NFE2L2/SMAD4/EP300	8
GO:2000773	negative regulation of cellular senescence	8/468	22/17913	4.74004e-08	3.58283e-07	1.47857e-07	TWIST1/TERT/MIR17/CDK6/SIRT1/HMGA2/MIR590/AKT3	8
GO:0070661	leukocyte proliferation	25/468	270/17913	4.76968e-08	3.59995e-07	1.48563e-07	BAX/BCL2/CASP3/CDKN1A/TGFB1/BST2/MIR21/MIR181B1/KIT/CTNNB1/IL33/TP53/IL10/ERBB2/SDC4/MEF2C/IL6/CSF1/HMGB1/BMP4/RAC2/MIR155/SOX11/ATM/HES1	25
GO:0048880	sensory system development	29/468	351/17913	5.02694e-08	3.78858e-07	1.56347e-07	TWIST1/VIM/BAX/BCL2/NES/SOX2/ZEB1/STAT3/CDKN1B/TGFB1/VEGFA/SLC7A11/CTNNB1/SMAD3/CDKN1C/HIF1A/CACNA1C/NTRK3/EGFR/ZEB2/BMP4/CDK4/COL4A1/PROM1/SOX11/TGFB2/FZD5/WNT5A/WNT6	29
GO:0010822	positive regulation of mitochondrion organization	16/468	115/17913	5.09048e-08	3.83086e-07	1.58092e-07	BAX/BCL2/MMP9/MAPK8/GSK3B/E2F1/TP53/HIF1A/TNFSF10/PRKAA1/CASP8/RAC2/KDR/SH3GLB1/FBXW7/FZD5	16
GO:0001774	microglial cell activation	11/468	50/17913	5.12848e-08	3.84823e-07	1.58809e-07	IL33/IL6/MIR128-1/SNCA/MIR124-1/MIR142/MAPT/MIR155/TNF/IFNG/ATM	11
GO:0002269	leukocyte activation involved in inflammatory response	11/468	50/17913	5.12848e-08	3.84823e-07	1.58809e-07	IL33/IL6/MIR128-1/SNCA/MIR124-1/MIR142/MAPT/MIR155/TNF/IFNG/ATM	11
GO:0001892	embryonic placenta development	14/468	87/17913	5.38668e-08	4.0361e-07	1.66562e-07	AKT1/SNAI1/MAPK1/IL10/CDKN1C/HIF1A/SETD2/EGFR/MAP2K1/CASP8/EPAS1/FZD5/PDGFB/HES1	14
GO:0051898	negative regulation of protein kinase B signaling	12/468	62/17913	5.80543e-08	4.34354e-07	1.79249e-07	AKT1/PTEN/MIR20A/MIR145/MIR34A/MIR137/SIRT1/NOP53/MIR29B1/MIR375/MIR29A/MIR29C	12
GO:0060439	trachea morphogenesis	6/468	10/17913	5.91904e-08	4.41572e-07	1.82228e-07	MAPK1/MAPK3/CTNNB1/HOXA5/MAP2K1/BMP4	6
GO:1903800	positive regulation of production of miRNAs involved in gene silencing by miRNA	6/468	10/17913	5.91904e-08	4.41572e-07	1.82228e-07	TGFB1/TP53/EGFR/MAP2K1/MAP2K2/BMP4	6
GO:0061311	cell surface receptor signaling pathway involved in heart development	9/468	31/17913	6.35151e-08	4.73151e-07	1.9526e-07	SNAI1/SNAI2/TGFB1/CTNNB1/MIR19B1/NOTCH1/BMP4/NOTCH2/WNT5A	9
GO:2000677	regulation of transcription regulatory region DNA binding	11/468	51/17913	6.38657e-08	4.75076e-07	1.96055e-07	TWIST1/PARP1/TGFB1/ZBTB7A/CTNNB1/RB1/HMGA2/SOX11/FBXW7/IFNG/EP300	11
GO:0006919	activation of cysteine-type endopeptidase activity involved in apoptotic process	13/468	75/17913	6.48208e-08	4.80102e-07	1.98129e-07	BAX/CASP9/SMAD3/APAF1/TNFRSF10B/TNFSF10/TNFRSF10A/ROBO1/SNCA/MAPT/CASP8/TNF/FAS	13
GO:0072078	nephron tubule morphogenesis	13/468	75/17913	6.48208e-08	4.80102e-07	1.98129e-07	BCL2/MYC/TGFB1/VEGFA/CTNNB1/FGF1/HOXA11/BMP4/SMAD4/PTCH1/HOXB7/WNT6/HES1	13
GO:0072332	intrinsic apoptotic signaling pathway by p53 class mediator	13/468	75/17913	6.48208e-08	4.80102e-07	1.98129e-07	BAX/BCL2/KDM1A/CDKN1A/MIR21/CD44/NUPR1/E2F1/TP53/SIRT1/MDM2/WWOX/EP300	13
GO:0009612	response to mechanical stimulus	21/468	200/17913	6.77945e-08	5.01407e-07	2.06921e-07	AKT1/TGFB1/MAPK3/MAPK8/RAF1/KIT/CCNB1/ANGPT2/TNFRSF10B/LTBR/PTGS2/EGFR/NFKB1/TNFRSF10A/CXCR4/MAPK14/MMP14/CASP8/HDAC4/PTCH1/FAS	21
GO:0051346	negative regulation of hydrolase activity	32/468	420/17913	6.78993e-08	5.01463e-07	2.06944e-07	AKT1/MMP9/BIRC5/CARD8/VEGFA/RAF1/BST2/C5/MIR21/MIR24-1/MIR152/MIR17/GSK3B/TIMP3/CD44/TP53/SIRT1/PTGS2/MIR195/MIR29B1/MIR19B1/MIR590/TIMP2/SNCA/MDM2/MIR29C/SERPINE1/ANGPTL4/AMOT/MIR182/TNF/TGFB2	32
GO:0043010	camera-type eye development	26/468	295/17913	6.96105e-08	5.13365e-07	2.11856e-07	TWIST1/VIM/BAX/NES/ZEB1/CDKN1B/TGFB1/VEGFA/SLC7A11/CTNNB1/SMAD3/CDKN1C/HIF1A/CACNA1C/NTRK3/EGFR/ZEB2/BMP4/CDK4/COL4A1/PROM1/SOX11/TGFB2/FZD5/WNT5A/WNT6	26
GO:1903589	positive regulation of blood vessel endothelial cell proliferation involved in sprouting angiogenesis	8/468	23/17913	7.10267e-08	5.23061e-07	2.15857e-07	VEGFA/MIR23A/MIR126/MIR23B/MIR503/MIR146A/MIR27B/MIR132	8
GO:0006606	protein import into nucleus	15/468	103/17913	7.16957e-08	5.27234e-07	2.17579e-07	AKT1/CDH1/CDKN1A/STAT3/TGFB1/MAPK1/SMAD3/TP53/PTGS2/DRD1/MAPK14/CD36/BMP4/IFNG/SUFU	15
GO:0050707	regulation of cytokine secretion	21/468	201/17913	7.39013e-08	5.4268e-07	2.23953e-07	TWIST1/CARD8/MAPK3/MIR204/C5/MIR24-1/MIR20A/IL33/MIR149/IL10/ATG5/FN1/DHX36/MIR590/MAPK14/HMGB1/MIR155/MIR182/TNF/FZD5/WNT5A	21
GO:0002739	regulation of cytokine secretion involved in immune response	7/468	16/17913	7.41236e-08	5.42766e-07	2.23989e-07	MAPK3/IL10/ATG5/MAPK14/MIR155/TNF/WNT5A	7
GO:1905203	regulation of connective tissue replacement	7/468	16/17913	7.41236e-08	5.42766e-07	2.23989e-07	MIR199A1/MIR17/MIR34A/MIR15B/MIR195/MIR214/MIR155	7
GO:0007005	mitochondrion organization	34/468	466/17913	7.47687e-08	5.46713e-07	2.25618e-07	AKT1/BAX/BCL2/PARP1/MMP9/STAT3/MAPK8/TERT/MIR17/GSK3B/E2F1/TP53/HIF1A/TNFSF10/NDUFC2/MIR29B1/PRKAA1/SNCA/CCAR2/MAPT/CASP8/RAC2/ATG3/KDR/MIR29A/MIR155/MIR29C/SH3GLB1/FBXW7/ESRRA/AKT3/EPAS1/FZD5/ATG7	34
GO:0006809	nitric oxide biosynthetic process	13/468	76/17913	7.63604e-08	5.57561e-07	2.30095e-07	AKT1/KLF2/MIR199A1/MIR181B1/SMAD3/IL10/CAV1/PTGS2/CD36/MTOR/TNF/IFNG/MIR132	13
GO:0097696	STAT cascade	18/468	150/17913	7.74774e-08	5.64917e-07	2.3313e-07	STAT3/ADIPOR1/KIT/MIR149/IL10/MIR221/CAV1/MIR125B1/MIR19A/MIR19B1/NOTCH1/IL6/CCL2/MIR155/MIR146A/TNF/IFNG/HES1	18
GO:0051249	regulation of lymphocyte activation	31/468	401/17913	7.88988e-08	5.74468e-07	2.37072e-07	AKT1/BCL2/CASP3/ZEB1/CDKN1A/SMAD7/TGFB1/GLI2/CDC42/MIR21/RUNX1/CTNNB1/IL10/ERBB2/CAV1/RUNX3/SDC4/MEF2C/IL6/PDPK1/SFRP1/MMP14/HMGB1/CCL2/BMP4/RAC2/MIR155/SOX11/IFNG/ATM/HES1	31
GO:0031669	cellular response to nutrient levels	22/468	220/17913	7.92874e-08	5.76483e-07	2.37903e-07	BCL2/SNAI2/CDKN1A/CDKN2B/MAPK1/MAPK3/MAPK8/FOXO1/FOXA2/TP53/SIRT1/MIR125B1/PTGS2/PRKAA1/SFRP1/MDM2/NFE2L2/MTOR/SH3GLB1/HSPA5/FAS/ATG7	22
GO:0008637	apoptotic mitochondrial changes	16/468	119/17913	8.30748e-08	6.0317e-07	2.48917e-07	AKT1/BAX/BCL2/MMP9/MAPK8/MIR17/GSK3B/E2F1/TP53/TNFSF10/MIR29B1/CCAR2/CASP8/ATG3/MIR29A/MIR29C	16
GO:0010719	negative regulation of epithelial to mesenchymal transition	9/468	32/17913	8.63388e-08	6.24231e-07	2.57608e-07	PTEN/ADIPOR1/SMAD7/FOXA2/MIR149/MIR29B1/MIR590/SFRP1/TGFB2	9
GO:0060317	cardiac epithelial to mesenchymal transition	9/468	32/17913	8.63388e-08	6.24231e-07	2.57608e-07	TWIST1/SNAI1/SNAI2/MIR21/PDCD4/NOTCH1/SMAD4/HAS2/TGFB2	9
GO:0097421	liver regeneration	9/468	32/17913	8.63388e-08	6.24231e-07	2.57608e-07	CCND1/EZH2/TGFB1/PCNA/IL10/EGFR/AURKA/PTCH1/TYMS	9
GO:2001056	positive regulation of cysteine-type endopeptidase activity	17/468	135/17913	8.74509e-08	6.31386e-07	2.60561e-07	BAX/CASP9/MYC/CARD8/SMAD3/APAF1/SIRT1/TNFRSF10B/TNFSF10/TNFRSF10A/ROBO1/SNCA/HMGB1/MAPT/CASP8/TNF/FAS	17
GO:0034644	cellular response to UV	13/468	77/17913	8.97142e-08	6.45017e-07	2.66186e-07	BAX/CASP9/PARP1/MYC/KDM1A/CDKN1A/PCNA/TP53/DHX36/SIRT1/PTGS2/MDM2/EP300	13
GO:0071260	cellular response to mechanical stimulus	13/468	77/17913	8.97142e-08	6.45017e-07	2.66186e-07	AKT1/TGFB1/MAPK3/MAPK8/TNFRSF10B/LTBR/PTGS2/EGFR/NFKB1/TNFRSF10A/CASP8/HDAC4/FAS	13
GO:0072088	nephron epithelium morphogenesis	13/468	77/17913	8.97142e-08	6.45017e-07	2.66186e-07	BCL2/MYC/TGFB1/VEGFA/CTNNB1/FGF1/HOXA11/BMP4/SMAD4/PTCH1/HOXB7/WNT6/HES1	13
GO:0051341	regulation of oxidoreductase activity	15/468	105/17913	9.31812e-08	6.6901e-07	2.76087e-07	AKT1/TERT/MIR21/MIR130B/HIF1A/CAV1/EGFR/NFKB1/SNCA/MIR138-1/WASL/TNF/IFNG/MIR27B/MIR132	15
GO:0090311	regulation of protein deacetylation	10/468	42/17913	9.36124e-08	6.71171e-07	2.76979e-07	TGFB1/VEGFA/MAPK8/TP53/PRKAA1/CCAR2/MAPT/MIR182/IFNG/EP300	10
GO:0045833	negative regulation of lipid metabolic process	14/468	91/17913	9.6711e-08	6.92424e-07	2.8575e-07	AKT1/SNAI1/SNAI2/MIR204/MIR33A/SIK1/SIRT1/NFKB1/PRKAA1/MIR138-1/FBXW7/TNF/PDGFB/MIR132	14
GO:0014031	mesenchymal cell development	12/468	65/17913	1.00828e-07	7.20195e-07	2.97211e-07	TWIST1/BCL2/SNAI2/MAPK1/MAPK3/FN1/HIF1A/ZEB2/NOTCH1/BMP4/SOX11/HES1	12
GO:0010466	negative regulation of peptidase activity	22/468	223/17913	1.00869e-07	7.20195e-07	2.97211e-07	AKT1/MMP9/BIRC5/CARD8/VEGFA/RAF1/BST2/C5/MIR24-1/MIR152/MIR17/TIMP3/CD44/PTGS2/MIR195/MIR29B1/MIR19B1/TIMP2/SNCA/MDM2/MIR29C/SERPINE1	22
GO:0048871	multicellular organismal homeostasis	34/468	472/17913	1.01555e-07	7.24088e-07	2.98817e-07	BAX/BCL2/KRT1/KDM1A/STAT3/ADIPOR1/VEGFA/CTNNB1/FOXO1/IGF1R/YAP1/RB1/CAV1/ADAMTS5/ANKRD11/PTGS2/EGFR/NOTCH1/IL6/CXCR4/PRKAA1/CA2/CSF1/DRD1/CD36/RAC2/FABP4/TSHR/PROM1/HAS2/TNF/AKT3/EPAS1/PRKAR2A	34
GO:0050866	negative regulation of cell activation	20/468	187/17913	1.02723e-07	7.31403e-07	3.01836e-07	CASP3/SMAD7/TGFB1/MIR21/RUNX1/MIR181B1/FOXF1/IL10/ERBB2/RUNX3/SDC4/SFRP1/MIR124-1/HMGB1/BMP4/MIR155/SOX11/ATM/BCR/PDGFB	20
GO:0150078	positive regulation of neuroinflammatory response	8/468	24/17913	1.04116e-07	7.39282e-07	3.05087e-07	NUPR1/IL33/IL6/MIR128-1/MIR206/MIR142/MIR155/TNF	8
GO:2000209	regulation of anoikis	8/468	24/17913	1.04116e-07	7.39282e-07	3.05087e-07	BCL2/SNAI2/SIK1/CAV1/NOTCH1/PTK2/MCL1/ITGB1	8
GO:0045913	positive regulation of carbohydrate metabolic process	13/468	78/17913	1.0513e-07	7.45453e-07	3.07634e-07	AKT1/WDR5/MIR210/FOXO1/MIR107/HIF1A/SIRT1/NFKB1/PRKAA1/PRKCE/SNCA/HAS2/PDGFB	13
GO:0030100	regulation of endocytosis	24/468	262/17913	1.08601e-07	7.6901e-07	3.17356e-07	PTEN/MIR199A1/TGFB1/VEGFA/MIR181B1/MIR17/MIR20A/ANXA2/ATG5/CAV1/PIK3CB/ANKFY1/SNCA/HMGB1/CCL2/CD36/ATG3/MIR155/SERPINE1/WASL/TNF/BCR/WNT5A/MIR27B	24
GO:2000058	regulation of ubiquitin-dependent protein catabolic process	17/468	137/17913	1.08758e-07	7.69064e-07	3.17378e-07	AKT1/PTEN/SMAD7/GSK3B/IL33/CAV1/NOP53/MAPK9/PTK2/CCAR2/MDM2/NFE2L2/AURKA/FBXW7/LATS1/SUFU/NKD2	17
GO:0008630	intrinsic apoptotic signaling pathway in response to DNA damage	14/468	92/17913	1.11383e-07	7.85474e-07	3.2415e-07	BCL2/CASP9/SNAI1/SNAI2/KDM1A/CDKN1A/CD44/NUPR1/E2F1/TP53/SIRT1/CCAR2/TNF/EP300	14
GO:0014020	primary neural tube formation	14/468	92/17913	1.11383e-07	7.85474e-07	3.2415e-07	TWIST1/TGFB1/APAF1/HIF1A/SETD2/SDC4/ZEB2/CTHRC1/SFRP1/BMP4/PTCH1/TGFB2/SUFU/WNT5A	14
GO:0043516	regulation of DNA damage response, signal transduction by p53 class mediator	9/468	33/17913	1.15989e-07	8.15722e-07	3.36633e-07	TWIST1/SNAI1/SNAI2/KDM1A/CD44/TP53/SIRT1/MDM2/ATM	9
GO:2000352	negative regulation of endothelial cell apoptotic process	9/468	33/17913	1.15989e-07	8.15722e-07	3.36633e-07	TERT/MIR126/MIR590/PDPK1/KDR/NFE2L2/SERPINE1/ANGPTL4/MIR495	9
GO:0032368	regulation of lipid transport	16/468	122/17913	1.18324e-07	8.31006e-07	3.4294e-07	AKT1/MIR144/MIR33A/MIR130B/MIR17/MIR34A/ANXA2/SIRT1/MIR148A/MIR19B1/NFKB1/MIR128-1/ABCA1/MIR302A/PTCH1/MIR27B	16
GO:0051154	negative regulation of striated muscle cell differentiation	10/468	43/17913	1.19157e-07	8.35722e-07	3.44886e-07	EZH2/MIR199A1/BDNF/YBX1/MIR222/MIR200B/MIR590/NOTCH1/HDAC4/SMAD4	10
GO:0001708	cell fate specification	13/468	79/17913	1.22883e-07	8.54631e-07	3.5269e-07	NANOG/SOX2/GLI2/FGFR1/CTNNB1/FOXA2/AR/HOXA11/NTRK3/POU5F1/PTCH1/SUFU/ITGB1	13
GO:0006476	protein deacetylation	13/468	79/17913	1.22883e-07	8.54631e-07	3.5269e-07	TGFB1/VEGFA/MAPK8/TP53/SIRT1/SFPQ/PRKAA1/CCAR2/MAPT/HDAC4/MIR182/IFNG/EP300	13
GO:0072028	nephron morphogenesis	13/468	79/17913	1.22883e-07	8.54631e-07	3.5269e-07	BCL2/MYC/TGFB1/VEGFA/CTNNB1/FGF1/HOXA11/BMP4/SMAD4/PTCH1/HOXB7/WNT6/HES1	13
GO:0014744	positive regulation of muscle adaptation	7/468	17/17913	1.2318e-07	8.54631e-07	3.5269e-07	MIR199A1/MIR17/MIR20A/FOXO3/MIR214/MIR155/MTOR	7
GO:0060438	trachea development	7/468	17/17913	1.2318e-07	8.54631e-07	3.5269e-07	MAPK1/MAPK3/CTNNB1/FOXF1/HOXA5/MAP2K1/BMP4	7
GO:0060644	mammary gland epithelial cell differentiation	7/468	17/17913	1.2318e-07	8.54631e-07	3.5269e-07	AKT1/FOXF1/HOXA5/HIF1A/PTCH1/ZNF703/LATS1	7
GO:1903209	positive regulation of oxidative stress-induced cell death	7/468	17/17913	1.2318e-07	8.54631e-07	3.5269e-07	MIR17/MIR34A/MMP3/FOXO3/SFPQ/MCL1/FBXW7	7
GO:2000811	negative regulation of anoikis	7/468	17/17913	1.2318e-07	8.54631e-07	3.5269e-07	BCL2/SNAI2/CAV1/NOTCH1/PTK2/MCL1/ITGB1	7
GO:0021915	neural tube development	18/468	155/17913	1.28477e-07	8.9019e-07	3.67364e-07	TWIST1/TGFB1/GLI2/SOX4/APAF1/HIF1A/SETD2/SDC4/ZEB2/CTHRC1/SFRP1/BMP4/PTCH1/SOX11/TGFB2/SUFU/WNT5A/HES1	18
GO:0032675	regulation of interleukin-6 production	17/468	139/17913	1.34703e-07	9.32073e-07	3.84648e-07	MIR181A1/TWIST1/KLF2/STAT3/MIR204/IL33/MIR149/IL10/MIR195/IL6/HMGB1/CD36/MIR155/MIR146A/TNF/WNT5A/MIR132	17
GO:0032612	interleukin-1 production	15/468	108/17913	1.36459e-07	9.4296e-07	3.89141e-07	MIR181A1/CARD8/MIR204/SMAD3/IL10/MIR195/ABCA1/MIR206/HMGB1/CD36/MIR155/MIR488/FZD5/WNT5A/MIR132	15
GO:0021537	telencephalon development	23/468	246/17913	1.38281e-07	9.54267e-07	3.93808e-07	BAX/CASP3/PTEN/EZH2/KDM1A/SLC7A11/CDH2/CTNNB1/GSK3B/CDK6/FEZF1/HIF1A/EGFR/POU3F3/ZEB2/CXCR4/DRD1/LPAR1/ROBO1/BMP4/CRKL/WNT5A/HES1	23
GO:0050708	regulation of protein secretion	33/468	456/17913	1.4132e-07	9.73939e-07	4.01926e-07	TWIST1/CARD8/TGFB1/MAPK3/MIR204/C5/SOX4/MIR24-1/MIR20A/FOXA2/IL33/MIR149/IL10/ATG5/FN1/DHX36/HIF1A/CACNA1C/EGFR/MIR29B1/MIR590/IL6/PRKCE/SFRP1/MAPK14/HMGB1/MIR155/MIR182/TNF/IFNG/TGFB2/FZD5/WNT5A	33
GO:0002066	columnar/cuboidal epithelial cell development	11/468	55/17913	1.46028e-07	1.00504e-06	4.1476e-07	CDKN1A/FGFR1/GSK3B/CDK6/HOXA5/HIF1A/MIR29B1/PDPK1/BMP4/WNT5A/TYMS	11
GO:0030316	osteoclast differentiation	14/468	94/17913	1.46899e-07	1.007e-06	4.15569e-07	TGFB1/CTNNB1/ANXA2/CA2/CSF1/SFRP1/MAPK14/MTOR/NOTCH2/FBXW7/ESRRA/TNF/IFNG/CREB1	14
GO:0043255	regulation of carbohydrate biosynthetic process	14/468	94/17913	1.46899e-07	1.007e-06	4.15569e-07	AKT1/TGFB1/WDR5/GSK3B/FOXO1/SIK1/MIR107/SIRT1/NFKB1/SNCA/MTOR/HAS2/EP300/PDGFB	14
GO:0110020	regulation of actomyosin structure organization	14/468	94/17913	1.46899e-07	1.007e-06	4.15569e-07	CDC42/MIR21/MIR20A/SMAD3/MIR149/SDC4/MEF2C/LPAR1/SFRP1/PXN/MTOR/SMAD4/MIR138-1/MIR1-1	14
GO:0019218	regulation of steroid metabolic process	16/468	124/17913	1.48867e-07	1.01913e-06	4.20576e-07	SNAI1/SNAI2/MIR33A/KIT/FGF1/SIRT1/FASN/SP1/NFKB1/PRKAA1/MIR183/MIR182/TNF/IFNG/MIR27B/MIR96	16
GO:0030225	macrophage differentiation	10/468	44/17913	1.50636e-07	1.02852e-06	4.24448e-07	PARP1/MMP9/TGFB1/VEGFA/CDC42/SIRT1/RB1/CSF1/CASP8/BMP4	10
GO:0030850	prostate gland development	10/468	44/17913	1.50636e-07	1.02852e-06	4.24448e-07	PTEN/CDKN1B/GLI2/HOXB13/CTNNB1/AR/SFRP1/BMP4/PTCH1/WNT5A	10
GO:0060249	anatomical structure homeostasis	31/468	413/17913	1.52607e-07	1.04059e-06	4.29433e-07	BAX/BCL2/PARP1/MYC/KRT1/TGFB1/VEGFA/MAPK1/MAPK3/TERT/PCNA/CTNNB1/CCNE1/YAP1/DHX36/HIF1A/RB1/ANKRD11/EGFR/IL6/PRKAA1/CCT4/CA2/CSF1/RAC2/MIR155/PROM1/HNRNPA2B1/AKT3/ATM/EPAS1	31
GO:0032148	activation of protein kinase B activity	9/468	34/17913	1.54123e-07	1.04816e-06	4.32554e-07	AKT1/MIR21/MIR143/FGF1/NTRK3/PDPK1/MTOR/PDGFB/WNT5A	9
GO:2001038	regulation of cellular response to drug	9/468	34/17913	1.54123e-07	1.04816e-06	4.32554e-07	MIR21/MIR17/MIR34A/IL10/HMGA2/FOXO3/NFE2L2/MIR155/KMT2A	9
GO:1903052	positive regulation of proteolysis involved in cellular protein catabolic process	15/468	109/17913	1.545e-07	1.04934e-06	4.33041e-07	AKT1/PTEN/SMAD7/GSK3B/NUPR1/IL33/CAV1/NOP53/MAPK9/PTK2/MDM2/NFE2L2/AURKA/FBXW7/NKD2	15
GO:0046209	nitric oxide metabolic process	13/468	81/17913	1.6667e-07	1.1305e-06	4.66536e-07	AKT1/KLF2/MIR199A1/MIR181B1/SMAD3/IL10/CAV1/PTGS2/CD36/MTOR/TNF/IFNG/MIR132	13
GO:0008585	female gonad development	14/468	95/17913	1.68233e-07	1.13513e-06	4.68447e-07	BAX/BCL2/CASP3/VEGFA/KIT/NUPR1/SIRT1/FOXO3/SFRP1/MMP14/SMAD4/HSPA5/IDH1/ATM	14
GO:0019217	regulation of fatty acid metabolic process	14/468	95/17913	1.68233e-07	1.13513e-06	4.68447e-07	TWIST1/AKT1/ADIPOR1/MIR204/MIR33A/SIRT1/CAV1/PTGS2/SNCA/MIR183/MTOR/MIR182/MIR96/MIR132	14
GO:0050810	regulation of steroid biosynthetic process	14/468	95/17913	1.68233e-07	1.13513e-06	4.68447e-07	SNAI1/SNAI2/MIR33A/FGF1/SIRT1/FASN/SP1/NFKB1/PRKAA1/MIR183/MIR182/TNF/IFNG/MIR96	14
GO:0060993	kidney morphogenesis	14/468	95/17913	1.68233e-07	1.13513e-06	4.68447e-07	BCL2/MYC/TGFB1/VEGFA/SOX4/CTNNB1/FGF1/HOXA11/BMP4/SMAD4/PTCH1/HOXB7/WNT6/HES1	14
GO:0014888	striated muscle adaptation	11/468	56/17913	1.77495e-07	1.1945e-06	4.92948e-07	EZH2/MIR199A1/MIR17/MIR20A/SMAD3/FOXO1/MEF2C/MIR214/HDAC4/MIR155/MTOR	11
GO:0033344	cholesterol efflux	11/468	56/17913	1.77495e-07	1.1945e-06	4.92948e-07	MIR144/MIR33A/MIR130B/SIRT1/MIR148A/MIR19B1/MIR128-1/ABCA1/MIR302A/PTCH1/MIR27B	11
GO:0043583	ear development	21/468	212/17913	1.83954e-07	1.23635e-06	5.1022e-07	TWIST1/BCL2/SOX2/ZEB1/CDKN1B/TGFB1/MAPK1/MAPK3/GLI2/FGFR1/ATG5/HOXA1/SDC4/NTRK3/CTHRC1/BMPER/BMP4/TGFB2/BCR/WNT5A/HES1	21
GO:0003197	endocardial cushion development	10/468	45/17913	1.89195e-07	1.26827e-06	5.23391e-07	TWIST1/SNAI1/SNAI2/FOXF1/NOTCH1/ROBO1/MDM2/BMP4/SMAD4/TGFB2	10
GO:0070266	necroptotic process	10/468	45/17913	1.89195e-07	1.26827e-06	5.23391e-07	MIR107/TP53/MIR221/CAV1/CASP8/MIR214/MIR155/TNF/FAS/MIR485	10
GO:0007044	cell-substrate junction assembly	14/468	96/17913	1.92319e-07	1.28587e-06	5.30654e-07	BCL2/PTEN/VEGFA/LAMC2/SMAD3/FN1/LAMB3/SDC4/PDPK1/SFRP1/MMP14/PTK2/KDR/LAMA3	14
GO:0042116	macrophage activation	14/468	96/17913	1.92319e-07	1.28587e-06	5.30654e-07	IL33/IL10/IL6/MIR128-1/PRKCE/SNCA/MIR124-1/MIR142/MAPT/MIR155/TNF/IFNG/ATM/WNT5A	14
GO:2000647	negative regulation of stem cell proliferation	7/468	18/17913	1.97041e-07	1.31573e-06	5.42976e-07	SNAI2/TGFB1/TP53/MIR222/MIR137/MIR221/MIR29B1	7
GO:0022409	positive regulation of cell-cell adhesion	23/468	251/17913	1.98995e-07	1.32706e-06	5.47652e-07	AKT1/SOX2/SMAD7/TGFB1/GLI2/CDC42/MIR21/RUNX1/CD44/FOXA2/IL10/CAV1/RUNX3/IL6/PDPK1/HMGB1/CCL2/MIR155/HAS2/TNF/IFNG/WNT5A/HES1	23
GO:0030224	monocyte differentiation	9/468	35/17913	2.0271e-07	1.34488e-06	5.55005e-07	MYC/VEGFA/CDK6/FASN/MIR125B1/HOXA7/MEF2C/CSF1/BMP4	9
GO:0048333	mesodermal cell differentiation	9/468	35/17913	2.0271e-07	1.34488e-06	5.55005e-07	FGFR1/MIR145/FOXF1/HOXA11/HMGA2/MIR150/MIR200C/BMP4/ITGB1	9
GO:0110111	negative regulation of animal organ morphogenesis	9/468	35/17913	2.0271e-07	1.34488e-06	5.55005e-07	BCL2/MIR20A/CTNNB1/NOTCH1/BMP4/FBXW7/TNF/TGFB2/WNT5A	9
GO:1903131	mononuclear cell differentiation	9/468	35/17913	2.0271e-07	1.34488e-06	5.55005e-07	MYC/VEGFA/CDK6/FASN/MIR125B1/HOXA7/MEF2C/CSF1/BMP4	9
GO:0006473	protein acetylation	20/468	195/17913	2.04799e-07	1.35699e-06	5.60004e-07	TWIST1/SNAI2/TGFB1/MAPK3/SOX4/WDR5/GSK3B/FOXO1/NUPR1/MIR34A/ATG5/SIRT1/MIR217/IWS1/PRKAA1/SNCA/MAPT/KMT2A/SMAD4/EP300	20
GO:1902175	regulation of oxidative stress-induced intrinsic apoptotic signaling pathway	8/468	26/17913	2.11217e-07	1.39414e-06	5.75334e-07	AKT1/PARP1/HIF1A/SIRT1/SFPQ/NFE2L2/MCL1/FBXW7	8
GO:1903203	regulation of oxidative stress-induced neuron death	8/468	26/17913	2.11217e-07	1.39414e-06	5.75334e-07	PARP1/SLC7A11/CTNNB1/IL10/HIF1A/MCL1/FBXW7/ATG7	8
GO:2000679	positive regulation of transcription regulatory region DNA binding	8/468	26/17913	2.11217e-07	1.39414e-06	5.75334e-07	TWIST1/PARP1/TGFB1/CTNNB1/RB1/HMGA2/IFNG/EP300	8
GO:0051055	negative regulation of lipid biosynthetic process	11/468	57/17913	2.14823e-07	1.41252e-06	5.82918e-07	SNAI1/SNAI2/MIR204/MIR33A/SIK1/SIRT1/NFKB1/PRKAA1/FBXW7/PDGFB/MIR132	11
GO:0060688	regulation of morphogenesis of a branching structure	11/468	57/17913	2.14823e-07	1.41252e-06	5.82918e-07	SNAI2/TGFB1/VEGFA/FGFR1/CTNNB1/AR/SFRP1/BMP4/TNF/HOXB7/WNT5A	11
GO:0090183	regulation of kidney development	11/468	57/17913	2.14823e-07	1.41252e-06	5.82918e-07	MMP9/MYC/MIR125A/TGFB1/VEGFA/CTNNB1/YAP1/BMP4/PROM1/HOXB7/PDGFB	11
GO:0070663	regulation of leukocyte proliferation	21/468	214/17913	2.15635e-07	1.41605e-06	5.84376e-07	BCL2/CASP3/CDKN1A/TGFB1/BST2/MIR21/MIR181B1/CTNNB1/IL10/ERBB2/SDC4/MEF2C/IL6/CSF1/HMGB1/BMP4/RAC2/MIR155/SOX11/ATM/HES1	21
GO:0010507	negative regulation of autophagy	13/468	83/17913	2.23963e-07	1.46887e-06	6.06174e-07	AKT1/BCL2/STAT3/MIR199A1/NUPR1/TP53/IL10/HERC1/SNCA/PTK2/MTOR/MCL1/ATG7	13
GO:0043271	negative regulation of ion transport	17/468	144/17913	2.26063e-07	1.48075e-06	6.11079e-07	TWIST1/AKT1/BCL2/PTEN/MMP9/TGFB1/MIR33A/MIR424/MIR34A/CAV1/PTGS2/PRKCE/STC1/SNCA/MTOR/MIR153-1/MIR1-1	17
GO:0042113	B cell activation	21/468	215/17913	2.33289e-07	1.52615e-06	6.29811e-07	BAX/BCL2/CASP3/CDKN1A/TGFB1/BST2/ZBTB7A/KIT/TP53/IL10/MIR19A/MEF2C/IL6/SFRP1/MMP14/CASP8/HDAC4/NOTCH2/EP300/ATM/ITGB1	21
GO:0060324	face development	10/468	46/17913	2.36159e-07	1.54296e-06	6.36751e-07	MMP2/TGFB1/MAPK1/MAPK3/RAF1/ANKRD11/MAP2K1/CLDN5/EP300/WNT5A	10
GO:0038061	NIK/NF-kappaB signaling	19/468	179/17913	2.41387e-07	1.57513e-06	6.50025e-07	AKT1/ADIPOR1/MIR204/MIR21/PDCD4/MIR130A/MIR149/TNFRSF10B/MIR125B1/EGFR/MIR29B1/MIR590/TNFRSF10A/MIR146A/MIR182/TNF/EP300/MIR27B/MIR132	19
GO:1904995	negative regulation of leukocyte adhesion to vascular endothelial cell	6/468	12/17913	2.49068e-07	1.62319e-06	6.6986e-07	MIR222/MIR221/MIR31/MIR155/MIR146A/MIR141	6
GO:0007043	cell-cell junction assembly	14/468	98/17913	2.5002e-07	1.62734e-06	6.71572e-07	SNAI1/SNAI2/ACE2/RUNX1/TJP1/CAV1/EPB41L3/CLDN5/OCLN/CDH5/MIR155/FSCN1/TNF/FZD5	14
GO:0051100	negative regulation of binding	18/468	162/17913	2.51843e-07	1.63714e-06	6.75615e-07	AKT1/BAX/NES/KDM1A/MAPK3/MAPK8/GSK3B/E2F1/IL10/MIR148A/CAV1/HMGA2/AURKA/SOX11/FBXW7/HSPA5/PDGFB/MIR27B	18
GO:0090559	regulation of membrane permeability	13/468	84/17913	2.58754e-07	1.67783e-06	6.9241e-07	BAX/BCL2/STAT3/MAPK8/MIR17/GSK3B/E2F1/TP53/MIR29B1/CASP8/MIR29A/MIR29C/MTOR	13
GO:2001057	reactive nitrogen species metabolic process	13/468	84/17913	2.58754e-07	1.67783e-06	6.9241e-07	AKT1/KLF2/MIR199A1/MIR181B1/SMAD3/IL10/CAV1/PTGS2/CD36/MTOR/TNF/IFNG/MIR132	13
GO:0022411	cellular component disassembly	34/468	492/17913	2.70252e-07	1.75019e-06	7.22269e-07	BAX/CASP3/MMP2/MMP9/MYC/NES/SNAI2/CDK1/TGFB1/MMP1/CLN3/CTNNB1/GSK3B/CD44/CCNB1/TP53/IGF1R/APAF1/MMP3/HIF1A/CAV1/ADAMTS5/VPS4A/TIMP2/IL6/MMP14/HMGB1/FSCN1/LRP6/MIR146A/FBXW7/TNF/FZD5/ATG7	34
GO:0035107	appendage morphogenesis	17/468	146/17913	2.76265e-07	1.78321e-06	7.35897e-07	TWIST1/BAX/RUNX2/GLI2/SOX4/FGFR1/CTNNB1/CACNA1C/HOXA10/HOXA11/HOXA9/BMP4/SMAD4/PTCH1/SOX11/TGFB2/WNT5A	17
GO:0035108	limb morphogenesis	17/468	146/17913	2.76265e-07	1.78321e-06	7.35897e-07	TWIST1/BAX/RUNX2/GLI2/SOX4/FGFR1/CTNNB1/CACNA1C/HOXA10/HOXA11/HOXA9/BMP4/SMAD4/PTCH1/SOX11/TGFB2/WNT5A	17
GO:0002695	negative regulation of leukocyte activation	18/468	163/17913	2.76389e-07	1.78321e-06	7.35897e-07	CASP3/SMAD7/TGFB1/MIR21/RUNX1/FOXF1/IL10/ERBB2/RUNX3/SDC4/SFRP1/MIR124-1/HMGB1/BMP4/MIR155/SOX11/ATM/BCR	18
GO:0046660	female sex differentiation	15/468	114/17913	2.81422e-07	1.81115e-06	7.47427e-07	BAX/BCL2/CASP3/VEGFA/KIT/NUPR1/SIRT1/FOXO3/SFRP1/MMP14/SMAD4/HSPA5/IDH1/ATM/WNT5A	15
GO:1901222	regulation of NIK/NF-kappaB signaling	15/468	114/17913	2.81422e-07	1.81115e-06	7.47427e-07	ADIPOR1/MIR204/MIR21/PDCD4/MIR149/TNFRSF10B/EGFR/MIR29B1/MIR590/TNFRSF10A/MIR146A/MIR182/TNF/EP300/MIR132	15
GO:1903532	positive regulation of secretion by cell	29/468	381/17913	2.89222e-07	1.85903e-06	7.67184e-07	TWIST1/CARD8/TGFB1/MAPK3/C5/SOX4/FGFR1/IL33/IL10/DHX36/HIF1A/SDC4/VPS4A/EGFR/IL6/PRKCE/SNCA/MAPK14/HMGB1/MIR155/SMAD4/SOX11/MIR182/TNF/IFNG/CREB1/TGFB2/FZD5/WNT5A	29
GO:0036475	neuron death in response to oxidative stress	8/468	27/17913	2.93327e-07	1.88306e-06	7.77104e-07	PARP1/SLC7A11/CTNNB1/IL10/HIF1A/MCL1/FBXW7/ATG7	8
GO:0010612	regulation of cardiac muscle adaptation	7/468	19/17913	3.04978e-07	1.94583e-06	8.03007e-07	MIR199A1/MIR17/MIR20A/SMAD3/FOXO1/MIR214/MIR155	7
GO:0060252	positive regulation of glial cell proliferation	7/468	19/17913	3.04978e-07	1.94583e-06	8.03007e-07	E2F1/MIR222/MIR221/MIR125B1/IL6/MTOR/TNF	7
GO:1903242	regulation of cardiac muscle hypertrophy in response to stress	7/468	19/17913	3.04978e-07	1.94583e-06	8.03007e-07	MIR199A1/MIR17/MIR20A/SMAD3/FOXO1/MIR214/MIR155	7
GO:0071772	response to BMP	17/468	147/17913	3.04992e-07	1.94583e-06	8.03007e-07	SMAD2/RUNX2/SMAD7/MAPK3/MIR21/PDCD4/MIR20A/NOTCH1/ADAMTS12/BMPER/SFRP1/MIR140/BMP4/SMAD4/SOX11/WNT5A/HES1	17
GO:0071773	cellular response to BMP stimulus	17/468	147/17913	3.04992e-07	1.94583e-06	8.03007e-07	SMAD2/RUNX2/SMAD7/MAPK3/MIR21/PDCD4/MIR20A/NOTCH1/ADAMTS12/BMPER/SFRP1/MIR140/BMP4/SMAD4/SOX11/WNT5A/HES1	17
GO:0046545	development of primary female sexual characteristics	14/468	100/17913	3.22856e-07	2.05726e-06	8.4899e-07	BAX/BCL2/CASP3/VEGFA/KIT/NUPR1/SIRT1/FOXO3/SFRP1/MMP14/SMAD4/HSPA5/IDH1/ATM	14
GO:0010614	negative regulation of cardiac muscle hypertrophy	9/468	37/17913	3.4095e-07	2.1672e-06	8.94359e-07	MIR199A1/MIR21/MIR145/SMAD3/FOXO1/NOTCH1/MIR214/SMAD4/MIR1-1	9
GO:2000648	positive regulation of stem cell proliferation	9/468	37/17913	3.4095e-07	2.1672e-06	8.94359e-07	NANOG/KDM1A/VEGFA/TERT/CTNNB1/HIF1A/HMGA2/LTBP3/SOX11	9
GO:0001843	neural tube closure	13/468	86/17913	3.43188e-07	2.17347e-06	8.96948e-07	TWIST1/TGFB1/APAF1/SETD2/SDC4/ZEB2/CTHRC1/SFRP1/BMP4/PTCH1/TGFB2/SUFU/WNT5A	13
GO:2000177	regulation of neural precursor cell proliferation	13/468	86/17913	3.43188e-07	2.17347e-06	8.96948e-07	NES/KDM1A/TGFB1/VEGFA/CDH2/GLI2/CTNNB1/FOXO1/TP53/MIR137/HIF1A/FOXO3/WNT5A	13
GO:0033157	regulation of intracellular protein transport	21/468	220/17913	3.43201e-07	2.17347e-06	8.96948e-07	CDH1/TGFB1/MAPK1/GSK3B/SMAD3/TP53/ERBB2/SETD2/IWS1/PTGS2/PRKAA1/MAPK14/CD36/MDM2/BMP4/RAC2/SH3GLB1/FBXW7/IFNG/FZD5/SUFU	21
GO:0032970	regulation of actin filament-based process	27/468	341/17913	3.43669e-07	2.17376e-06	8.97068e-07	TGFB1/CDC42/BST2/MIR21/MIR20A/SMAD3/MIR149/CACNA1C/CAV1/SDC4/NTRK3/MEF2C/ACTR2/LPAR1/PRKCE/STC1/SFRP1/PXN/MIR214/FSCN1/MTOR/SMAD4/MIR138-1/NOTCH2/WASL/LATS1/MIR1-1	27
GO:0031050	dsRNA processing	10/468	48/17913	3.61609e-07	2.28164e-06	9.41587e-07	SMAD2/TGFB1/TERT/SMAD3/TP53/EGFR/MAP2K1/MAP2K2/BMP4/HNRNPA2B1	10
GO:0070918	production of small RNA involved in gene silencing by RNA	10/468	48/17913	3.61609e-07	2.28164e-06	9.41587e-07	SMAD2/TGFB1/TERT/SMAD3/TP53/EGFR/MAP2K1/MAP2K2/BMP4/HNRNPA2B1	10
GO:0030307	positive regulation of cell growth	18/468	166/17913	3.63701e-07	2.29203e-06	9.45875e-07	AKT1/BCL2/MIR199A1/VEGFA/BDNF/CDC42/FN1/ERBB2/MIR19A/NTRK3/EGFR/MIR19B1/CXCR4/SFRP1/MMP14/MAPT/MTOR/TGFB2	18
GO:1905269	positive regulation of chromatin organization	14/468	101/17913	3.6599e-07	2.30364e-06	9.50667e-07	SNAI2/KDM1A/TGFB1/VEGFA/MAPK3/CTNNB1/CCNB1/TP53/SIRT1/DNMT1/MORC2/KMT2A/SMAD4/ATM	14
GO:0032635	interleukin-6 production	17/468	149/17913	3.7074e-07	2.33069e-06	9.6183e-07	MIR181A1/TWIST1/KLF2/STAT3/MIR204/IL33/MIR149/IL10/MIR195/IL6/HMGB1/CD36/MIR155/MIR146A/TNF/WNT5A/MIR132	17
GO:0035601	protein deacylation	13/468	87/17913	3.94014e-07	2.47098e-06	1.01972e-06	TGFB1/VEGFA/MAPK8/TP53/SIRT1/SFPQ/PRKAA1/CCAR2/MAPT/HDAC4/MIR182/IFNG/EP300	13
GO:0060606	tube closure	13/468	87/17913	3.94014e-07	2.47098e-06	1.01972e-06	TWIST1/TGFB1/APAF1/SETD2/SDC4/ZEB2/CTHRC1/SFRP1/BMP4/PTCH1/TGFB2/SUFU/WNT5A	13
GO:0051047	positive regulation of secretion	30/468	409/17913	3.9776e-07	2.49143e-06	1.02817e-06	TWIST1/CARD8/TGFB1/MAPK3/C5/SOX4/FGFR1/IL33/IL10/ATG5/DHX36/HIF1A/SDC4/VPS4A/EGFR/IL6/PRKCE/SNCA/MAPK14/HMGB1/MIR155/SMAD4/SOX11/MIR182/TNF/IFNG/CREB1/TGFB2/FZD5/WNT5A	30
GO:0003180	aortic valve morphogenesis	8/468	28/17913	4.01325e-07	2.50161e-06	1.03236e-06	TWIST1/SNAI1/SNAI2/TGFB1/RB1/NOTCH1/ROBO1/BMP4	8
GO:0010165	response to X-ray	8/468	28/17913	4.01325e-07	2.50161e-06	1.03236e-06	CASP3/CCND1/CDKN1A/TP53/NUCKS1/HMGA2/SFRP1/ATM	8
GO:0070306	lens fiber cell differentiation	8/468	28/17913	4.01325e-07	2.50161e-06	1.03236e-06	VIM/CDKN1B/TGFB1/SLC7A11/SMAD3/CDKN1C/NTRK3/ZEB2	8
GO:1902932	positive regulation of alcohol biosynthetic process	8/468	28/17913	4.01325e-07	2.50161e-06	1.03236e-06	FGF1/PRKAA1/SNCA/MIR183/MIR182/TNF/IFNG/MIR96	8
GO:0030509	BMP signaling pathway	16/468	134/17913	4.38458e-07	2.72648e-06	1.12516e-06	SMAD2/RUNX2/SMAD7/MAPK3/MIR21/PDCD4/MIR20A/NOTCH1/BMPER/SFRP1/MIR140/BMP4/SMAD4/SOX11/WNT5A/HES1	16
GO:0034332	adherens junction organization	16/468	134/17913	4.38458e-07	2.72648e-06	1.12516e-06	BCL2/PTEN/CDH1/SMAD7/VEGFA/CDH2/CTNNB1/SMAD3/SDC4/PDPK1/SFRP1/CDH5/MMP14/PTK2/KDR/ZNF703	16
GO:0043388	positive regulation of DNA binding	11/468	61/17913	4.43057e-07	2.74773e-06	1.13394e-06	TWIST1/PARP1/MMP9/TGFB1/CTNNB1/RB1/HMGA2/HMGB1/IFNG/EP300/HES1	11
GO:0010712	regulation of collagen metabolic process	10/468	49/17913	4.43828e-07	2.74773e-06	1.13394e-06	VIM/TGFB1/MIR218-1/MIR145/MIR149/MIR29B1/IL6/BMP4/MIR29A/ITGB1	10
GO:0046902	regulation of mitochondrial membrane permeability	12/468	74/17913	4.44008e-07	2.74773e-06	1.13394e-06	BAX/BCL2/STAT3/MAPK8/MIR17/GSK3B/E2F1/TP53/MIR29B1/CASP8/MIR29A/MIR29C	12
GO:1900182	positive regulation of protein localization to nucleus	12/468	74/17913	4.44008e-07	2.74773e-06	1.13394e-06	AKT1/PARP1/CDH1/CDK1/TGFB1/MAPK1/TERT/SMAD3/PTGS2/CCT4/MAPK14/IFNG	12
GO:0031058	positive regulation of histone modification	13/468	88/17913	4.51468e-07	2.78721e-06	1.15023e-06	SNAI2/KDM1A/TGFB1/VEGFA/MAPK3/CTNNB1/CCNB1/TP53/SIRT1/DNMT1/KMT2A/SMAD4/ATM	13
GO:0098732	macromolecule deacylation	13/468	88/17913	4.51468e-07	2.78721e-06	1.15023e-06	TGFB1/VEGFA/MAPK8/TP53/SIRT1/SFPQ/PRKAA1/CCAR2/MAPT/HDAC4/MIR182/IFNG/EP300	13
GO:0060312	regulation of blood vessel remodeling	6/468	13/17913	4.52352e-07	2.78932e-06	1.1511e-06	TGFB1/MIR143/MIR17/MIR20A/MIR29B1/BCR	6
GO:0002374	cytokine secretion involved in immune response	7/468	20/17913	4.58668e-07	2.82152e-06	1.16439e-06	MAPK3/IL10/ATG5/MAPK14/MIR155/TNF/WNT5A	7
GO:0032769	negative regulation of monooxygenase activity	7/468	20/17913	4.58668e-07	2.82152e-06	1.16439e-06	MIR130B/CAV1/NFKB1/SNCA/MIR138-1/MIR27B/MIR132	7
GO:0032091	negative regulation of protein binding	14/468	103/17913	4.68118e-07	2.87622e-06	1.18696e-06	AKT1/BAX/NES/KDM1A/MAPK3/MAPK8/GSK3B/IL10/MIR148A/CAV1/AURKA/HSPA5/PDGFB/MIR27B	14
GO:0002791	regulation of peptide secretion	33/468	483/17913	5.25879e-07	3.22477e-06	1.3308e-06	TWIST1/CARD8/TGFB1/MAPK3/MIR204/C5/SOX4/MIR24-1/MIR20A/FOXA2/IL33/MIR149/IL10/ATG5/FN1/DHX36/HIF1A/CACNA1C/EGFR/MIR29B1/MIR590/IL6/PRKCE/SFRP1/MAPK14/HMGB1/MIR155/MIR182/TNF/IFNG/TGFB2/FZD5/WNT5A	33
GO:0070265	necrotic cell death	11/468	62/17913	5.26097e-07	3.22477e-06	1.3308e-06	BAX/MIR107/TP53/MIR221/CAV1/CASP8/MIR214/MIR155/TNF/FAS/MIR485	11
GO:0009267	cellular response to starvation	16/468	136/17913	5.37396e-07	3.29011e-06	1.35777e-06	BCL2/CDKN1A/MAPK1/MAPK3/MAPK8/FOXO1/TP53/SIRT1/PRKAA1/SFRP1/NFE2L2/MTOR/SH3GLB1/HSPA5/FAS/ATG7	16
GO:1904994	regulation of leukocyte adhesion to vascular endothelial cell	8/468	29/17913	5.41618e-07	3.31022e-06	1.36606e-06	MIR21/MIR222/MIR221/MIR31/MIR155/MIR146A/MIR141/TNF	8
GO:0060425	lung morphogenesis	10/468	50/17913	5.41964e-07	3.31022e-06	1.36606e-06	MAPK1/MAPK3/CTNNB1/FOXF1/YAP1/HOXA5/MAP2K1/BMP4/SOX11/TNF	10
GO:0046425	regulation of JAK-STAT cascade	15/468	120/17913	5.53509e-07	3.37049e-06	1.39094e-06	STAT3/ADIPOR1/KIT/IL10/MIR221/CAV1/MIR19A/MIR19B1/NOTCH1/IL6/MIR155/MIR146A/TNF/IFNG/HES1	15
GO:1905477	positive regulation of protein localization to membrane	15/468	120/17913	5.53509e-07	3.37049e-06	1.39094e-06	AKT1/BCL2/TGFB1/MAPK8/E2F1/TP53/ERBB2/EGFR/PDPK1/PRKCE/CASP8/TNF/IFNG/ITGB1/NKD2	15
GO:0014741	negative regulation of muscle hypertrophy	9/468	39/17913	5.54448e-07	3.37049e-06	1.39094e-06	MIR199A1/MIR21/MIR145/SMAD3/FOXO1/NOTCH1/MIR214/SMAD4/MIR1-1	9
GO:2000826	regulation of heart morphogenesis	9/468	39/17913	5.54448e-07	3.37049e-06	1.39094e-06	TWIST1/MIR20A/CTNNB1/NOTCH1/ROBO1/BMP4/SMAD4/TGFB2/HES1	9
GO:0043433	negative regulation of DNA-binding transcription factor activity	18/468	171/17913	5.66483e-07	3.4396e-06	1.41946e-06	TWIST1/EZH2/KDM1A/CARD8/SMAD7/CDKN2A/FOXA2/SIK1/NUPR1/IL10/SIRT1/RB1/HDAC4/MIR155/PTCH1/MIR138-1/SUFU/MIR1-1	18
GO:0034333	adherens junction assembly	13/468	90/17913	5.89314e-07	3.56982e-06	1.47319e-06	BCL2/PTEN/SMAD7/VEGFA/CTNNB1/SMAD3/SDC4/PDPK1/SFRP1/MMP14/PTK2/KDR/ZNF703	13
GO:0050764	regulation of phagocytosis	13/468	90/17913	5.89314e-07	3.56982e-06	1.47319e-06	PTEN/TGFB1/MIR181B1/MIR17/MIR20A/ATG5/HMGB1/CCL2/CD36/ATG3/MIR155/TNF/BCR	13
GO:0001659	temperature homeostasis	18/468	172/17913	6.17691e-07	3.73732e-06	1.54232e-06	KDM1A/STAT3/ADIPOR1/VEGFA/FOXO1/IGF1R/RB1/CAV1/ADAMTS5/PTGS2/NOTCH1/CXCR4/DRD1/CD36/FABP4/TSHR/TNF/EPAS1	18
GO:0002700	regulation of production of molecular mediator of immune response	16/468	138/17913	6.56105e-07	3.96045e-06	1.6344e-06	SMAD7/TGFB1/MAPK3/BST2/IL33/IL10/ATG5/DHX36/IL6/MAPK14/CD36/MIR155/TNF/TGFB2/FZD5/WNT5A	16
GO:0044344	cellular response to fibroblast growth factor stimulus	16/468	138/17913	6.56105e-07	3.96045e-06	1.6344e-06	RUNX2/MAPK1/MAPK3/FGFR1/MIR424/CTNNB1/CD44/FGF1/SFRP1/SNCA/CCL2/MIR503/MIR146A/CRKL/WNT5A/MIR1-1	16
GO:0035065	regulation of histone acetylation	10/468	51/17913	6.58573e-07	3.96143e-06	1.63481e-06	TWIST1/SNAI2/TGFB1/MAPK3/ATG5/SIRT1/IWS1/SNCA/KMT2A/SMAD4	10
GO:0045599	negative regulation of fat cell differentiation	10/468	51/17913	6.58573e-07	3.96143e-06	1.63481e-06	TGFB1/SMAD3/FOXO1/MIR107/E2F1/SIRT1/IL6/TNF/WNT5A/MIR27B	10
GO:0045668	negative regulation of osteoblast differentiation	10/468	51/17913	6.58573e-07	3.96143e-06	1.63481e-06	TWIST1/SMAD3/CDK6/NOTCH1/SFRP1/HDAC4/PTCH1/MIR138-1/TNF/SUFU	10
GO:0002440	production of molecular mediator of immune response	19/468	191/17913	6.61938e-07	3.97703e-06	1.64124e-06	SMAD7/TGFB1/MAPK3/BST2/KIT/IL33/IL10/ATG5/DHX36/SIRT1/IL6/MAPK14/CD36/MIR155/TNF/TGFB2/ATM/FZD5/WNT5A	19
GO:0010893	positive regulation of steroid biosynthetic process	7/468	21/17913	6.72569e-07	4.02682e-06	1.66179e-06	FGF1/PRKAA1/MIR183/MIR182/TNF/IFNG/MIR96	7
GO:0070920	regulation of production of small RNA involved in gene silencing by RNA	7/468	21/17913	6.72569e-07	4.02682e-06	1.66179e-06	TGFB1/TERT/TP53/EGFR/MAP2K1/MAP2K2/BMP4	7
GO:0071498	cellular response to fluid shear stress	7/468	21/17913	6.72569e-07	4.02682e-06	1.66179e-06	KLF2/MIR126/PTGS2/MEF2C/CA2/NFE2L2/HAS2	7
GO:0010951	negative regulation of endopeptidase activity	20/468	210/17913	6.76986e-07	4.04387e-06	1.66883e-06	AKT1/MMP9/BIRC5/CARD8/VEGFA/RAF1/BST2/C5/MIR24-1/MIR152/MIR17/TIMP3/CD44/PTGS2/MIR195/MIR19B1/SNCA/MDM2/MIR29C/SERPINE1	20
GO:0046777	protein autophosphorylation	20/468	210/17913	6.76986e-07	4.04387e-06	1.66883e-06	AKT1/VEGFA/MAPK3/FGFR1/KIT/GSK3B/SIK1/IGF1R/ERBB2/CAV1/EGFR/PDPK1/MAP2K2/PTK2/KDR/AURKA/MTOR/ATM/BCR/PDGFB	20
GO:0045670	regulation of osteoclast differentiation	11/468	64/17913	7.34313e-07	4.37617e-06	1.80596e-06	CTNNB1/CA2/CSF1/SFRP1/MTOR/NOTCH2/FBXW7/ESRRA/TNF/IFNG/CREB1	11
GO:1902108	regulation of mitochondrial membrane permeability involved in apoptotic process	11/468	64/17913	7.34313e-07	4.37617e-06	1.80596e-06	BAX/BCL2/MAPK8/MIR17/GSK3B/E2F1/TP53/MIR29B1/CASP8/MIR29A/MIR29C	11
GO:0014902	myotube differentiation	14/468	107/17913	7.52257e-07	4.47793e-06	1.84795e-06	BCL2/BDNF/SIK1/MIR200B/RBM38/MAML1/MEF2C/NOTCH1/MIR206/MAPK14/MMP14/HDAC4/MTOR/MIR1-1	14
GO:0030326	embryonic limb morphogenesis	15/468	123/17913	7.63784e-07	4.53607e-06	1.87195e-06	TWIST1/BAX/RUNX2/GLI2/FGFR1/CTNNB1/CACNA1C/HOXA10/HOXA11/HOXA9/BMP4/SMAD4/PTCH1/TGFB2/WNT5A	15
GO:0035113	embryonic appendage morphogenesis	15/468	123/17913	7.63784e-07	4.53607e-06	1.87195e-06	TWIST1/BAX/RUNX2/GLI2/FGFR1/CTNNB1/CACNA1C/HOXA10/HOXA11/HOXA9/BMP4/SMAD4/PTCH1/TGFB2/WNT5A	15
GO:0034392	negative regulation of smooth muscle cell apoptotic process	6/468	14/17913	7.74162e-07	4.58713e-06	1.89302e-06	MIR21/MIR17/MIR210/DNMT1/LRP6/MIR138-1	6
GO:1905064	negative regulation of vascular smooth muscle cell differentiation	6/468	14/17913	7.74162e-07	4.58713e-06	1.89302e-06	MIR21/PDCD4/MIR221/DNMT1/MIR15B/PDGFB	6
GO:0031668	cellular response to extracellular stimulus	22/468	251/17913	7.83794e-07	4.63887e-06	1.91437e-06	BCL2/SNAI2/CDKN1A/CDKN2B/MAPK1/MAPK3/MAPK8/FOXO1/FOXA2/TP53/SIRT1/MIR125B1/PTGS2/PRKAA1/SFRP1/MDM2/NFE2L2/MTOR/SH3GLB1/HSPA5/FAS/ATG7	22
GO:0007259	JAK-STAT cascade	16/468	140/17913	7.98025e-07	4.71768e-06	1.9469e-06	STAT3/ADIPOR1/KIT/IL10/MIR221/CAV1/MIR19A/MIR19B1/NOTCH1/IL6/CCL2/MIR155/MIR146A/TNF/IFNG/HES1	16
GO:0030512	negative regulation of transforming growth factor beta receptor signaling pathway	12/468	78/17913	7.99506e-07	4.72103e-06	1.94828e-06	SMAD2/SMAD7/TGFB1/ZBTB7A/SMAD3/TP53/SIRT1/CAV1/MIR15B/MIR29B1/PDPK1/HSPA5	12
GO:0031647	regulation of protein stability	23/468	272/17913	8.26697e-07	4.876e-06	2.01223e-06	BCL2/CASP3/PTEN/CDKN1A/SMAD7/MAPK1/TERT/SOX4/SMAD3/TP53/SIRT1/NOP53/CCT4/SNCA/CCAR2/MDM2/UBE2B/AURKA/TESC/SH3GLB1/FBXW7/CREB1/EP300	23
GO:0048864	stem cell development	11/468	65/17913	8.63356e-07	5.0864e-06	2.09906e-06	TWIST1/SNAI2/MAPK1/MAPK3/FN1/HIF1A/SETD2/ZEB2/BMP4/SOX11/HES1	11
GO:0032611	interleukin-1 beta production	13/468	93/17913	8.66846e-07	5.08692e-06	2.09927e-06	MIR181A1/CARD8/MIR204/SMAD3/MIR195/ABCA1/MIR206/CD36/MIR155/MIR488/FZD5/WNT5A/MIR132	13
GO:1901800	positive regulation of proteasomal protein catabolic process	13/468	93/17913	8.66846e-07	5.08692e-06	2.09927e-06	AKT1/SMAD7/GSK3B/NUPR1/IL33/CAV1/NOP53/MAPK9/MDM2/NFE2L2/AURKA/FBXW7/NKD2	13
GO:0048736	appendage development	18/468	176/17913	8.67391e-07	5.08692e-06	2.09927e-06	TWIST1/BAX/RUNX2/SLC7A11/GLI2/SOX4/FGFR1/CTNNB1/CACNA1C/HOXA10/HOXA11/HOXA9/BMP4/SMAD4/PTCH1/SOX11/TGFB2/WNT5A	18
GO:0060173	limb development	18/468	176/17913	8.67391e-07	5.08692e-06	2.09927e-06	TWIST1/BAX/RUNX2/SLC7A11/GLI2/SOX4/FGFR1/CTNNB1/CACNA1C/HOXA10/HOXA11/HOXA9/BMP4/SMAD4/PTCH1/SOX11/TGFB2/WNT5A	18
GO:0008631	intrinsic apoptotic signaling pathway in response to oxidative stress	9/468	41/17913	8.75071e-07	5.1145e-06	2.11066e-06	AKT1/BCL2/PARP1/HIF1A/SIRT1/SFPQ/NFE2L2/MCL1/FBXW7	9
GO:0014002	astrocyte development	9/468	41/17913	8.75071e-07	5.1145e-06	2.11066e-06	VIM/MIR181B1/CDK6/EGFR/IL6/DRD1/MIR142/MAPT/TNF	9
GO:0019048	modulation by virus of host morphology or physiology	9/468	41/17913	8.75071e-07	5.1145e-06	2.11066e-06	TGFB1/SMAD3/MIR222/MIR221/NTRK3/CASP8/MIR155/ATG7/TYMS	9
GO:0060560	developmental growth involved in morphogenesis	20/468	214/17913	9.13077e-07	5.33059e-06	2.19983e-06	TGFB1/VEGFA/BDNF/CTNNB1/GSK3B/FGF1/FN1/YAP1/NTRK3/MIR195/ZEB2/NOTCH1/CXCR4/CSF1/SFRP1/MAPT/BMP4/AURKA/WNT5A/ITGB1	20
GO:0021953	central nervous system neuron differentiation	18/468	177/17913	9.42692e-07	5.49726e-06	2.26861e-06	PTEN/GLI2/SOX4/CTNNB1/ZEB2/HERC1/DRD1/ROBO1/SFRP1/PTK2/MAPT/LRP6/PTCH1/FAIM2/CRKL/SUFU/WNT5A/HES1	18
GO:0001759	organ induction	7/468	22/17913	9.64314e-07	5.61065e-06	2.31541e-06	FGFR1/CTNNB1/FGF1/AR/HOXA11/ROBO1/BMP4	7
GO:0060065	uterus development	7/468	22/17913	9.64314e-07	5.61065e-06	2.31541e-06	CDKN1C/HOXA10/HOXA11/HOXA9/SMAD4/TGFB2/WNT5A	7
GO:0007584	response to nutrient	20/468	215/17913	9.82799e-07	5.71176e-06	2.35713e-06	PTEN/CCND1/SNAI2/CDKN2B/TGFB1/PCNA/FOXA2/APAF1/MIR125B1/NNT/PTGS2/EGFR/ABCA1/STC1/SFRP1/MDM2/MTOR/PKM/CREB1/TYMS	20
GO:0043030	regulation of macrophage activation	11/468	66/17913	1.01196e-06	5.86798e-06	2.4216e-06	IL33/IL10/IL6/MIR128-1/SNCA/MIR124-1/MIR142/MIR155/TNF/ATM/WNT5A	11
GO:0061035	regulation of cartilage development	11/468	66/17913	1.01196e-06	5.86798e-06	2.4216e-06	SNAI2/RUNX2/TGFB1/GLI2/MIR21/CTNNB1/SMAD3/HOXA11/ADAMTS12/BMP4/WNT5A	11
GO:0042476	odontogenesis	15/468	126/17913	1.04339e-06	6.04345e-06	2.49401e-06	TWIST1/BAX/RUNX2/TGFB1/GLI2/CTNNB1/FOXO1/ADAMTS5/ANKRD11/CA2/CSF1/BMP4/SERPINE1/TGFB2/WNT6	15
GO:0048588	developmental cell growth	20/468	216/17913	1.05734e-06	6.10681e-06	2.52016e-06	MIR199A1/VEGFA/BDNF/MIR24-1/CTNNB1/GSK3B/MIR23A/FN1/MIR23B/MIR19A/NTRK3/MIR195/MIR19B1/ZEB2/CXCR4/MAPT/AURKA/MTOR/WNT5A/ITGB1	20
GO:0009798	axis specification	12/468	80/17913	1.05788e-06	6.10681e-06	2.52016e-06	SMAD2/CTNNB1/FOXA2/STC1/SFRP1/BMP4/AURKA/SMAD4/PTCH1/FZD5/WNT5A/WNT6	12
GO:1903845	negative regulation of cellular response to transforming growth factor beta stimulus	12/468	80/17913	1.05788e-06	6.10681e-06	2.52016e-06	SMAD2/SMAD7/TGFB1/ZBTB7A/SMAD3/TP53/SIRT1/CAV1/MIR15B/MIR29B1/PDPK1/HSPA5	12
GO:0032956	regulation of actin cytoskeleton organization	24/468	297/17913	1.07926e-06	6.22188e-06	2.56765e-06	TGFB1/CDC42/BST2/MIR21/MIR20A/SMAD3/MIR149/SDC4/NTRK3/MEF2C/ACTR2/LPAR1/PRKCE/SFRP1/PXN/MIR214/FSCN1/MTOR/SMAD4/MIR138-1/NOTCH2/WASL/LATS1/MIR1-1	24
GO:0072594	establishment of protein localization to organelle	31/468	452/17913	1.08023e-06	6.22188e-06	2.56765e-06	AKT1/BAX/BCL2/CDH1/CDKN1A/STAT3/TGFB1/MAPK1/MAPK8/TERT/SMAD3/E2F1/TP53/VPS4A/PTGS2/PRKAA1/CCT4/DRD1/MAPK14/CD36/MAPT/CASP8/BMP4/RAC2/SH3GLB1/FBXW7/IFNG/HSPA5/IDH1/FZD5/SUFU	31
GO:0045429	positive regulation of nitric oxide biosynthetic process	9/468	42/17913	1.0882e-06	6.26077e-06	2.5837e-06	AKT1/KLF2/MIR181B1/SMAD3/PTGS2/CD36/MTOR/TNF/IFNG	9
GO:0044262	cellular carbohydrate metabolic process	22/468	256/17913	1.09298e-06	6.28129e-06	2.59217e-06	AKT1/PTEN/STAT3/ADIPOR1/WDR5/MIR210/GSK3B/TFF3/FOXO1/FOXA2/SIK1/MIR107/NUPR1/TP53/SIRT1/PRKCE/SNCA/HDAC4/MTOR/HAS2/IDH1/EP300	22
GO:1901796	regulation of signal transduction by p53 class mediator	18/468	179/17913	1.11136e-06	6.37982e-06	2.63283e-06	TWIST1/AKT1/BCL2/SNAI1/SNAI2/KDM1A/CDK2/MIR21/CD44/TP53/SIRT1/NOP53/PRKAA1/MAPK14/MDM2/AURKA/EP300/ATM	18
GO:0030178	negative regulation of Wnt signaling pathway	19/468	198/17913	1.14673e-06	6.57177e-06	2.71204e-06	SNAI2/SOX2/LATS2/CDH2/GSK3B/FOXO1/WIF1/CAV1/MIR29B1/FOXO3/CTHRC1/SFRP1/MAPK14/LRP6/WWOX/LATS1/WNT5A/MIR1-1/NKD2	19
GO:0002763	positive regulation of myeloid leukocyte differentiation	10/468	54/17913	1.1499e-06	6.57177e-06	2.71204e-06	TGFB1/RUNX1/RB1/CA2/CSF1/CASP8/TESC/TNF/IFNG/CREB1	10
GO:0032715	negative regulation of interleukin-6 production	10/468	54/17913	1.1499e-06	6.57177e-06	2.71204e-06	MIR181A1/KLF2/MIR204/MIR149/IL10/MIR195/MIR155/MIR146A/TNF/MIR132	10
GO:0061005	cell differentiation involved in kidney development	10/468	54/17913	1.1499e-06	6.57177e-06	2.71204e-06	MMP9/CTNNB1/YAP1/MEF2C/POU3F3/BMP4/PTCH1/PROM1/PDGFB/HES1	10
GO:0044839	cell cycle G2/M phase transition	22/468	257/17913	1.16685e-06	6.65387e-06	2.74592e-06	CCND1/NES/CDKN1A/CDK1/CDK2/CDKN2B/ABCB1/MIR21/CCNB1/TP53/NOP53/VPS4A/HMGA2/MIR195/MIR19B1/HMMR/AURKA/CDK4/FOXM1/CDC25C/LATS1/ATM	22
GO:0051091	positive regulation of DNA-binding transcription factor activity	22/468	257/17913	1.16685e-06	6.65387e-06	2.74592e-06	AKT1/PTEN/KDM1A/STAT3/TGFB1/VEGFA/ZBTB7A/KIT/CTNNB1/SMAD3/IL10/AR/CAV1/MIR19B1/IL6/NFKB1/CD36/HDAC4/LRP6/TNF/EP300/WNT5A	22
GO:0043900	regulation of multi-organism process	29/468	408/17913	1.18157e-06	6.72886e-06	2.77687e-06	BCL2/CARD8/MAPK3/BST2/MIR181B1/MIR130A/ANXA2/MIR222/IL10/MIR221/CAV1/MIR15B/MORC2/NOP53/NUCKS1/VPS4A/HMGA2/SP1/ILF3/CXCR4/CD36/HDAC4/MIR155/AURKA/C1QBP/STAU1/TNF/IFNG/EP300	29
GO:0045669	positive regulation of osteoblast differentiation	11/468	67/17913	1.18261e-06	6.72886e-06	2.77687e-06	RUNX2/MIR21/MIR210/CTNNB1/MIR29B1/MEF2C/IL6/MIR200C/CTHRC1/BMP4/SOX11	11
GO:0014068	positive regulation of phosphatidylinositol 3-kinase signaling	12/468	81/17913	1.21288e-06	6.8783e-06	2.83854e-06	MIR21/FGFR1/KIT/SIRT1/MIR126/NTRK3/PIK3CB/PTK2/KDR/TNF/TGFB2/PDGFB	12
GO:0030510	regulation of BMP signaling pathway	12/468	81/17913	1.21288e-06	6.8783e-06	2.83854e-06	SMAD2/SMAD7/MIR20A/NOTCH1/BMPER/SFRP1/MIR140/BMP4/SMAD4/SOX11/WNT5A/HES1	12
GO:0046889	positive regulation of lipid biosynthetic process	12/468	81/17913	1.21288e-06	6.8783e-06	2.83854e-06	AKT1/FGF1/PTGS2/MIR29B1/PRKAA1/MIR183/MTOR/MIR182/TNF/IFNG/CREB1/MIR96	12
GO:0003176	aortic valve development	8/468	32/17913	1.2389e-06	7.00278e-06	2.88991e-06	TWIST1/SNAI1/SNAI2/TGFB1/RB1/NOTCH1/ROBO1/BMP4	8
GO:0033028	myeloid cell apoptotic process	8/468	32/17913	1.2389e-06	7.00278e-06	2.88991e-06	BCL2/PTEN/SLC7A11/CDKN2A/SIRT1/PIK3CB/MEF2C/IL6	8
GO:1904031	positive regulation of cyclin-dependent protein kinase activity	8/468	32/17913	1.2389e-06	7.00278e-06	2.88991e-06	AKT1/CCND1/CDKN1A/CDKN1B/CCNB1/EGFR/CCND2/PDGFB	8
GO:0000086	G2/M transition of mitotic cell cycle	21/468	238/17913	1.25287e-06	7.07294e-06	2.91887e-06	CCND1/NES/CDKN1A/CDK1/CDK2/CDKN2B/ABCB1/MIR21/CCNB1/NOP53/VPS4A/HMGA2/MIR195/MIR19B1/HMMR/AURKA/CDK4/FOXM1/CDC25C/LATS1/ATM	21
GO:0032652	regulation of interleukin-1 production	13/468	96/17913	1.25543e-06	7.07294e-06	2.91887e-06	MIR181A1/CARD8/MIR204/SMAD3/IL10/MIR195/MIR206/HMGB1/MIR155/MIR488/FZD5/WNT5A/MIR132	13
GO:0097327	response to antineoplastic agent	13/468	96/17913	1.25543e-06	7.07294e-06	2.91887e-06	CASP9/CDH1/ABCC2/TGFB1/PCNA/CTNNB1/FOXO1/EIF4E/EGFR/FOXO3/PRKAA1/CDK4/PDGFB	13
GO:0034616	response to laminar fluid shear stress	6/468	15/17913	1.26183e-06	7.10127e-06	2.93055e-06	KLF2/SMAD7/TGFB1/MIR126/ABCA1/NFE2L2	6
GO:0071774	response to fibroblast growth factor	16/468	145/17913	1.2817e-06	7.20521e-06	2.97345e-06	RUNX2/MAPK1/MAPK3/FGFR1/MIR424/CTNNB1/CD44/FGF1/SFRP1/SNCA/CCL2/MIR503/MIR146A/CRKL/WNT5A/MIR1-1	16
GO:0010959	regulation of metal ion transport	27/468	365/17913	1.29689e-06	7.28266e-06	3.00541e-06	AKT1/BAX/BCL2/PTEN/TGFB1/MIR21/MIR424/MIR210/CTNNB1/SIK1/MIR34A/ATG5/CACNA1C/CAV1/PTGS2/CXCR4/PDPK1/DRD1/PRKCE/STC1/SNCA/CCL2/CALCR/TESC/MIR153-1/PDGFB/MIR1-1	27
GO:0006282	regulation of DNA repair	14/468	112/17913	1.31937e-06	7.40084e-06	3.05418e-06	TWIST1/PARP1/KDM1A/PCNA/MIR221/SETD2/SIRT1/HMGA2/EGFR/ACTR2/HMGB1/FUS/FOXM1/CUL4A	14
GO:0032944	regulation of mononuclear cell proliferation	19/468	200/17913	1.33514e-06	7.48113e-06	3.08732e-06	BCL2/CASP3/CDKN1A/TGFB1/MIR21/CTNNB1/IL10/ERBB2/SDC4/MEF2C/IL6/CSF1/HMGB1/BMP4/RAC2/MIR155/SOX11/ATM/HES1	19
GO:0060443	mammary gland morphogenesis	9/468	43/17913	1.34471e-06	7.50212e-06	3.09598e-06	BAX/TGFB1/GLI2/AR/CAV1/CSF1/BMP4/PTCH1/WNT5A	9
GO:1901031	regulation of response to reactive oxygen species	9/468	43/17913	1.34471e-06	7.50212e-06	3.09598e-06	MIR21/MIR17/MIR34A/IL10/FOXO3/CD36/NFE2L2/MIR155/TNF	9
GO:1904407	positive regulation of nitric oxide metabolic process	9/468	43/17913	1.34471e-06	7.50212e-06	3.09598e-06	AKT1/KLF2/MIR181B1/SMAD3/PTGS2/CD36/MTOR/TNF/IFNG	9
GO:1904646	cellular response to amyloid-beta	9/468	43/17913	1.34471e-06	7.50212e-06	3.09598e-06	PARP1/GSK3B/IGF1R/MIR200A/MIR106B/FOXO3/MIR140/CD36/MIR146A	9
GO:2000637	positive regulation of gene silencing by miRNA	7/468	23/17913	1.35513e-06	7.55209e-06	3.1166e-06	STAT3/TGFB1/TP53/EGFR/MAP2K1/MAP2K2/BMP4	7
GO:0010876	lipid localization	27/468	366/17913	1.36678e-06	7.60878e-06	3.14e-06	AKT1/ABCB1/ABCC1/ABCC2/MIR144/MIR33A/MIR130B/MIR17/MIR34A/ANXA2/SIRT1/MIR148A/CAV1/VPS4A/MIR19B1/IL6/NFKB1/MIR128-1/ABCA1/CD36/MIR155/MIR302A/FABP4/PTCH1/FBXW7/TNF/MIR27B	27
GO:0031663	lipopolysaccharide-mediated signaling pathway	10/468	55/17913	1.37298e-06	7.62686e-06	3.14746e-06	AKT1/CARD8/TGFB1/MAPK1/MAPK3/PRKCE/MAPK14/CCL2/CD36/TNF	10
GO:0042306	regulation of protein import into nucleus	10/468	55/17913	1.37298e-06	7.62686e-06	3.14746e-06	CDH1/TGFB1/MAPK1/SMAD3/PTGS2/MAPK14/CD36/BMP4/IFNG/SUFU	10
GO:0032436	positive regulation of proteasomal ubiquitin-dependent protein catabolic process	11/468	68/17913	1.37806e-06	7.64684e-06	3.1557e-06	AKT1/SMAD7/GSK3B/IL33/CAV1/NOP53/MAPK9/MDM2/NFE2L2/AURKA/NKD2	11
GO:1903364	positive regulation of cellular protein catabolic process	15/468	129/17913	1.4118e-06	7.8256e-06	3.22947e-06	AKT1/PTEN/SMAD7/GSK3B/NUPR1/IL33/CAV1/NOP53/MAPK9/PTK2/MDM2/NFE2L2/AURKA/FBXW7/NKD2	15
GO:0002062	chondrocyte differentiation	13/468	97/17913	1.41576e-06	7.83913e-06	3.23506e-06	SNAI2/RUNX2/TGFB1/GLI2/FGFR1/CTNNB1/SMAD3/HOXA11/HMGA2/MEF2C/ADAMTS12/MAPK14/BMP4	13
GO:0006913	nucleocytoplasmic transport	24/468	302/17913	1.45147e-06	8.02824e-06	3.3131e-06	AKT1/CDH1/CDKN1A/STAT3/TGFB1/GEMIN2/MAPK1/GSK3B/SMAD3/TP53/EIF4E/SETD2/IWS1/PTGS2/SMN1/DRD1/MAPK14/CD36/MDM2/BMP4/IFNG/RBM4/HNRNPA2B1/SUFU	24
GO:0010906	regulation of glucose metabolic process	14/468	113/17913	1.47056e-06	8.10771e-06	3.3459e-06	AKT1/ADIPOR1/WDR5/MIR210/GSK3B/TFF3/FOXO1/FOXA2/SIK1/MIR107/TP53/SIRT1/MTOR/EP300	14
GO:0051817	modification of morphology or physiology of other organism involved in symbiotic interaction	14/468	113/17913	1.47056e-06	8.10771e-06	3.3459e-06	TGFB1/SMAD3/ANXA2/MIR222/MIR221/NUCKS1/HMGA2/NTRK3/SP1/CASP8/MIR155/EP300/ATG7/TYMS	14
GO:0071482	cellular response to light stimulus	14/468	113/17913	1.47056e-06	8.10771e-06	3.3459e-06	BAX/CASP9/PARP1/MYC/KDM1A/CDKN1A/PCNA/TP53/PPEF1/DHX36/SIRT1/PTGS2/MDM2/EP300	14
GO:1901617	organic hydroxy compound biosynthetic process	21/468	241/17913	1.53407e-06	8.44887e-06	3.48668e-06	SNAI1/SNAI2/SLC7A11/MIR33A/MIR210/TP53/FGF1/SIRT1/FASN/SP1/ZEB2/NFKB1/PRKAA1/SNCA/MIR183/MIR182/TNF/IFNG/TGFB2/WNT5A/MIR96	21
GO:1903531	negative regulation of secretion by cell	19/468	202/17913	1.55127e-06	8.53445e-06	3.522e-06	VAMP3/CARD8/MIR204/MIR24-1/MIR20A/FOXF1/IL33/MIR149/IL10/FN1/MIR29B1/MIR590/NOTCH1/SFRP1/SNCA/RAP1B/MIR155/TNF/BCR	19
GO:0042136	neurotransmitter biosynthetic process	13/468	98/17913	1.59405e-06	8.75546e-06	3.61321e-06	AKT1/KLF2/MIR199A1/MIR181B1/SMAD3/IL10/CAV1/PTGS2/CD36/MTOR/TNF/IFNG/MIR132	13
GO:0010092	specification of animal organ identity	8/468	33/17913	1.59823e-06	8.75546e-06	3.61321e-06	FGFR1/CTNNB1/FGF1/AR/HOXA11/MEF2C/ROBO1/BMP4	8
GO:0031128	developmental induction	8/468	33/17913	1.59823e-06	8.75546e-06	3.61321e-06	FGFR1/CTNNB1/FGF1/AR/HOXA11/ROBO1/BMP4/FZD5	8
GO:1901223	negative regulation of NIK/NF-kappaB signaling	8/468	33/17913	1.59823e-06	8.75546e-06	3.61321e-06	ADIPOR1/MIR204/MIR21/MIR149/MIR29B1/MIR590/MIR146A/MIR132	8
GO:0051193	regulation of cofactor metabolic process	14/468	114/17913	1.63703e-06	8.9585e-06	3.697e-06	STAT3/SLC7A11/ZBTB7A/MIR210/NUPR1/TP53/MMP3/HIF1A/NNT/PRKAA1/SNCA/RAC2/NFE2L2/HDAC4	14
GO:0032965	regulation of collagen biosynthetic process	9/468	44/17913	1.65175e-06	9.01035e-06	3.7184e-06	VIM/TGFB1/MIR218-1/MIR145/MIR149/MIR29B1/IL6/BMP4/MIR29A	9
GO:0035196	production of miRNAs involved in gene silencing by miRNA	9/468	44/17913	1.65175e-06	9.01035e-06	3.7184e-06	SMAD2/TGFB1/SMAD3/TP53/EGFR/MAP2K1/MAP2K2/BMP4/HNRNPA2B1	9
GO:0048701	embryonic cranial skeleton morphogenesis	9/468	44/17913	1.65175e-06	9.01035e-06	3.7184e-06	TWIST1/SMAD2/RUNX2/SMAD3/SETD2/HOXA1/MEF2C/MMP14/BMP4	9
GO:0050731	positive regulation of peptidyl-tyrosine phosphorylation	18/468	184/17913	1.65927e-06	9.04179e-06	3.73137e-06	STAT3/TGFB1/VEGFA/BDNF/KIT/CD44/TP53/MIR221/MIR19A/MIR19B1/IL6/CD36/MTOR/FBXW7/TNF/IFNG/PDGFB/HES1	18
GO:0002696	positive regulation of leukocyte activation	24/468	305/17913	1.72793e-06	9.3961e-06	3.87759e-06	AKT1/BCL2/CDKN1A/TGFB1/GLI2/CDC42/MIR21/RUNX1/IL33/IL10/CAV1/RUNX3/MEF2C/IL6/MIR128-1/PDPK1/MMP14/HMGB1/MIR142/CCL2/MIR155/IFNG/WNT5A/HES1	24
GO:0051169	nuclear transport	24/468	305/17913	1.72793e-06	9.3961e-06	3.87759e-06	AKT1/CDH1/CDKN1A/STAT3/TGFB1/GEMIN2/MAPK1/GSK3B/SMAD3/TP53/EIF4E/SETD2/IWS1/PTGS2/SMN1/DRD1/MAPK14/CD36/MDM2/BMP4/IFNG/RBM4/HNRNPA2B1/SUFU	24
GO:0090100	positive regulation of transmembrane receptor protein serine/threonine kinase signaling pathway	12/468	84/17913	1.80524e-06	9.80615e-06	4.04681e-06	PARP1/SMAD2/CDKN2B/TGFB1/CDKN1C/NOTCH1/MIR140/BMP4/SMAD4/SOX11/EP300/HES1	12
GO:0034381	plasma lipoprotein particle clearance	11/468	70/17913	1.85579e-06	1.00701e-05	4.15573e-06	MIR199A1/MIR144/MIR33A/MIR17/ANXA2/MIR148A/MIR128-1/CD36/MIR155/MIR302A/MIR27B	11
GO:0030308	negative regulation of cell growth	17/468	167/17913	1.86107e-06	1.00882e-05	4.16319e-06	BCL2/CDKN1A/CDKN1B/ADIPOR1/MIR199A1/TGFB1/BST2/SMAD3/CDKN2A/TP53/SIRT1/CDKN2C/SFRP1/CCAR2/SMAD4/TGFB2/WNT5A	17
GO:0043122	regulation of I-kappaB kinase/NF-kappaB signaling	20/468	224/17913	1.86661e-06	1.00929e-05	4.16515e-06	AKT1/CARD8/BST2/CTNNB1/MIR497/DHX36/SIRT1/TNFRSF10B/MIR15B/TNFSF10/LTBR/UBE2I/MIR195/PDPK1/LPAR1/PRKCE/CD36/CASP8/TNF/WNT5A	20
GO:0036003	positive regulation of transcription from RNA polymerase II promoter in response to stress	7/468	24/17913	1.87025e-06	1.00929e-05	4.16515e-06	KLF2/VEGFA/TP53/HIF1A/NOTCH1/NFE2L2/HSPA5	7
GO:0060148	positive regulation of posttranscriptional gene silencing	7/468	24/17913	1.87025e-06	1.00929e-05	4.16515e-06	STAT3/TGFB1/TP53/EGFR/MAP2K1/MAP2K2/BMP4	7
GO:0060571	morphogenesis of an epithelial fold	7/468	24/17913	1.87025e-06	1.00929e-05	4.16515e-06	GLI2/CTNNB1/HIF1A/AR/EGFR/BMP4/WNT5A	7
GO:0051924	regulation of calcium ion transport	21/468	244/17913	1.87174e-06	1.00929e-05	4.16515e-06	BAX/BCL2/TGFB1/MIR21/MIR424/CTNNB1/MIR34A/ATG5/CACNA1C/CAV1/PTGS2/CXCR4/PDPK1/DRD1/PRKCE/STC1/SNCA/CCL2/CALCR/PDGFB/MIR1-1	21
GO:0051250	negative regulation of lymphocyte activation	15/468	132/17913	1.893e-06	1.01969e-05	4.20804e-06	CASP3/SMAD7/TGFB1/MIR21/RUNX1/IL10/ERBB2/RUNX3/SDC4/SFRP1/HMGB1/BMP4/MIR155/SOX11/ATM	15
GO:1903749	positive regulation of establishment of protein localization to mitochondrion	10/468	57/17913	1.93458e-06	1.041e-05	4.296e-06	BCL2/MAPK8/E2F1/TP53/PRKAA1/CASP8/RAC2/SH3GLB1/FBXW7/FZD5	10
GO:0050863	regulation of T cell activation	24/468	307/17913	1.93821e-06	1.04186e-05	4.29957e-06	AKT1/CASP3/ZEB1/SMAD7/TGFB1/GLI2/CDC42/MIR21/RUNX1/CTNNB1/IL10/ERBB2/CAV1/RUNX3/SDC4/IL6/PDPK1/HMGB1/CCL2/BMP4/RAC2/MIR155/IFNG/HES1	24
GO:0090316	positive regulation of intracellular protein transport	16/468	150/17913	2.01535e-06	1.08217e-05	4.46591e-06	CDH1/TGFB1/MAPK1/GSK3B/SMAD3/TP53/ERBB2/PTGS2/PRKAA1/MAPK14/MDM2/RAC2/SH3GLB1/FBXW7/IFNG/FZD5	16
GO:0061756	leukocyte adhesion to vascular endothelial cell	9/468	45/17913	2.01739e-06	1.08217e-05	4.46591e-06	MIR21/MIR222/MIR221/MIR31/MIR155/MIR146A/MIR141/TNF/ITGB1	9
GO:2000736	regulation of stem cell differentiation	14/468	116/17913	2.02133e-06	1.08316e-05	4.46998e-06	STAT3/RUNX1/CDK6/YAP1/DHX36/NOTCH1/LTBP3/BMP4/SP7/NFE2L2/KMT2A/MIR146A/TGFB2/HES1	14
GO:0010464	regulation of mesenchymal cell proliferation	8/468	34/17913	2.04257e-06	1.0934e-05	4.51226e-06	MYC/ZEB1/VEGFA/FGFR1/CTNNB1/FOXF1/BMP4/WNT5A	8
GO:0046427	positive regulation of JAK-STAT cascade	12/468	85/17913	2.05296e-06	1.09782e-05	4.5305e-06	STAT3/ADIPOR1/KIT/IL10/MIR221/MIR19A/MIR19B1/NOTCH1/IL6/TNF/IFNG/HES1	12
GO:0032943	mononuclear cell proliferation	21/468	246/17913	2.1331e-06	1.13949e-05	4.70247e-06	BAX/BCL2/CASP3/CDKN1A/TGFB1/MIR21/CTNNB1/TP53/IL10/ERBB2/SDC4/MEF2C/IL6/CSF1/HMGB1/BMP4/RAC2/MIR155/SOX11/ATM/HES1	21
GO:0051048	negative regulation of secretion	20/468	226/17913	2.14209e-06	1.14311e-05	4.71741e-06	VAMP3/CARD8/MIR204/MIR24-1/MIR33A/MIR20A/FOXF1/IL33/MIR149/IL10/FN1/MIR29B1/MIR590/NOTCH1/SFRP1/SNCA/RAP1B/MIR155/TNF/BCR	20
GO:1903747	regulation of establishment of protein localization to mitochondrion	11/468	71/17913	2.14503e-06	1.1435e-05	4.719e-06	BCL2/MAPK8/E2F1/TP53/PRKAA1/MAPT/CASP8/RAC2/SH3GLB1/FBXW7/FZD5	11
GO:0090090	negative regulation of canonical Wnt signaling pathway	17/468	169/17913	2.19453e-06	1.16868e-05	4.82291e-06	SNAI2/SOX2/LATS2/CDH2/GSK3B/FOXO1/CAV1/MIR29B1/FOXO3/CTHRC1/SFRP1/MAPK14/LRP6/LATS1/WNT5A/MIR1-1/NKD2	17
GO:0018107	peptidyl-threonine phosphorylation	13/468	101/17913	2.25465e-06	1.19946e-05	4.94992e-06	AKT1/BCL2/CDK1/SMAD7/TGFB1/MAPK1/MAPK8/GSK3B/CADM4/PDPK1/MAP2K1/MTOR/WNT5A	13
GO:1902110	positive regulation of mitochondrial membrane permeability involved in apoptotic process	10/468	58/17913	2.28368e-06	1.21239e-05	5.00332e-06	BAX/BCL2/MAPK8/GSK3B/E2F1/TP53/MIR29B1/CASP8/MIR29A/MIR29C	10
GO:1904589	regulation of protein import	10/468	58/17913	2.28368e-06	1.21239e-05	5.00332e-06	CDH1/TGFB1/MAPK1/SMAD3/PTGS2/MAPK14/CD36/BMP4/IFNG/SUFU	10
GO:0048538	thymus development	9/468	46/17913	2.45067e-06	1.29971e-05	5.36365e-06	BCL2/MAPK1/MAPK3/RAF1/CTNNB1/MAP2K1/ATM/CRKL/HES1	9
GO:0015850	organic hydroxy compound transport	20/468	228/17913	2.45404e-06	1.30016e-05	5.36551e-06	ABCC2/MIR144/MIR33A/MIR130B/MIR17/ANXA2/SIRT1/MIR148A/CAV1/VPS4A/MIR19B1/NFKB1/MIR128-1/ABCA1/DRD1/SNCA/CD36/MIR302A/PTCH1/MIR27B	20
GO:0006275	regulation of DNA replication	13/468	102/17913	2.52348e-06	1.33421e-05	5.50601e-06	CDK1/CDK2/GLI2/FGFR1/PCNA/TP53/ATF1/NUCKS1/EGFR/MIR155/CDT1/FBXW7/ATG7	13
GO:0097006	regulation of plasma lipoprotein particle levels	13/468	102/17913	2.52348e-06	1.33421e-05	5.50601e-06	MIR199A1/MIR144/MIR33A/MIR17/ANXA2/MIR148A/MIR19B1/MIR128-1/ABCA1/CD36/MIR155/MIR302A/MIR27B	13
GO:2000353	positive regulation of endothelial cell apoptotic process	7/468	25/17913	2.53938e-06	1.34124e-05	5.53504e-06	MIR125A/MIR24-1/PDCD4/FOXO3/MIR375/CCL2/MIR132	7
GO:0003203	endocardial cushion morphogenesis	8/468	35/17913	2.58772e-06	1.35981e-05	5.61165e-06	TWIST1/SNAI1/SNAI2/NOTCH1/ROBO1/MDM2/SMAD4/TGFB2	8
GO:0045740	positive regulation of DNA replication	8/468	35/17913	2.58772e-06	1.35981e-05	5.61165e-06	CDK1/CDK2/GLI2/FGFR1/PCNA/ATF1/EGFR/CDT1	8
GO:0051354	negative regulation of oxidoreductase activity	8/468	35/17913	2.58772e-06	1.35981e-05	5.61165e-06	MIR21/MIR130B/CAV1/NFKB1/SNCA/MIR138-1/MIR27B/MIR132	8
GO:0071542	dopaminergic neuron differentiation	8/468	35/17913	2.58772e-06	1.35981e-05	5.61165e-06	VEGFA/CTNNB1/GSK3B/FOXA2/HIF1A/SFRP1/LRP6/WNT5A	8
GO:0090322	regulation of superoxide metabolic process	8/468	35/17913	2.58772e-06	1.35981e-05	5.61165e-06	TGFB1/MIR21/EGFR/CD36/MAPT/NFE2L2/TNF/MIR27B	8
GO:0009410	response to xenobiotic stimulus	22/468	270/17913	2.64462e-06	1.38829e-05	5.72922e-06	CASP9/ABCC2/TGFB1/PCNA/FOXO1/E2F1/EIF4E/RB1/GGT1/EGFR/FOXO3/CXCR4/PRKAA1/DRD1/PRKCE/SNCA/MDM2/MTOR/HSPA5/ARNT2/PDGFB/ATG7	22
GO:0045843	negative regulation of striated muscle tissue development	10/468	59/17913	2.68629e-06	1.4073e-05	5.80765e-06	TWIST1/PTEN/MIR199A1/TGFB1/MIR222/MIR200B/MIR590/BMP4/SMAD4/MIR1-1	10
GO:0090303	positive regulation of wound healing	10/468	59/17913	2.68629e-06	1.4073e-05	5.80765e-06	MIR199A1/MIR17/MIR221/MIR590/CXCR4/PRKCE/CD36/NFE2L2/SERPINE1/MTOR	10
GO:0060536	cartilage morphogenesis	5/468	10/17913	2.69451e-06	1.40732e-05	5.80772e-06	SNAI1/SNAI2/HOXA5/MEF2C/STC1	5
GO:0090205	positive regulation of cholesterol metabolic process	5/468	10/17913	2.69451e-06	1.40732e-05	5.80772e-06	FGF1/PRKAA1/MIR183/MIR182/MIR96	5
GO:1904684	negative regulation of metalloendopeptidase activity	5/468	10/17913	2.69451e-06	1.40732e-05	5.80772e-06	MIR24-1/MIR152/TIMP3/MIR195/MIR29C	5
GO:1902903	regulation of supramolecular fiber organization	24/468	313/17913	2.71757e-06	1.41792e-05	5.8515e-06	CDKN1B/CDC42/MIR21/MIR20A/SMAD3/MIR149/RB1/SDC4/MIR29B1/MEF2C/ACTR2/LPAR1/PRKCE/SFRP1/SNCA/PXN/MAPT/MIR214/MTOR/SMAD4/MIR138-1/WASL/LATS1/MIR1-1	24
GO:0045912	negative regulation of carbohydrate metabolic process	9/468	47/17913	2.96168e-06	1.54373e-05	6.37066e-06	STAT3/TGFB1/GSK3B/FOXA2/SIK1/NUPR1/TP53/HDAC4/EP300	9
GO:0061323	cell proliferation involved in heart morphogenesis	6/468	17/17913	2.98425e-06	1.54835e-05	6.38975e-06	MIR20A/CTNNB1/NOTCH1/BMP4/SMAD4/HES1	6
GO:1905331	negative regulation of morphogenesis of an epithelium	6/468	17/17913	2.98425e-06	1.54835e-05	6.38975e-06	PTEN/MIR21/CTNNB1/BMP4/TNF/WNT5A	6
GO:2000136	regulation of cell proliferation involved in heart morphogenesis	6/468	17/17913	2.98425e-06	1.54835e-05	6.38975e-06	MIR20A/CTNNB1/NOTCH1/BMP4/SMAD4/HES1	6
GO:0030522	intracellular receptor signaling pathway	22/468	272/17913	2.9843e-06	1.54835e-05	6.38975e-06	PAGR1/TWIST1/PARP1/SNAI2/EZH2/STAT3/RUNX1/ZBTB7A/CTNNB1/CCNE1/YAP1/AR/SIRT1/RB1/NOP53/SFRP1/CASP8/C1QBP/ESRRA/LATS1/EP300/CRKL	22
GO:1904894	positive regulation of STAT cascade	12/468	88/17913	2.98557e-06	1.54835e-05	6.38975e-06	STAT3/ADIPOR1/KIT/IL10/MIR221/MIR19A/MIR19B1/NOTCH1/IL6/TNF/IFNG/HES1	12
GO:0019079	viral genome replication	14/468	120/17913	3.03929e-06	1.57463e-05	6.49818e-06	BCL2/CDC42/BST2/MIR222/MIR221/ATG5/MORC2/NUCKS1/HMGA2/ILF3/CCL2/MIR155/STAU1/TNF	14
GO:0046824	positive regulation of nucleocytoplasmic transport	10/468	60/17913	3.14919e-06	1.62666e-05	6.71291e-06	CDH1/TGFB1/MAPK1/GSK3B/SMAD3/TP53/PTGS2/MAPK14/MDM2/IFNG	10
GO:0048635	negative regulation of muscle organ development	10/468	60/17913	3.14919e-06	1.62666e-05	6.71291e-06	TWIST1/PTEN/MIR199A1/TGFB1/MIR222/MIR200B/MIR590/BMP4/SMAD4/MIR1-1	10
GO:1902686	mitochondrial outer membrane permeabilization involved in programmed cell death	10/468	60/17913	3.14919e-06	1.62666e-05	6.71291e-06	BAX/BCL2/MAPK8/GSK3B/E2F1/TP53/MIR29B1/CASP8/MIR29A/MIR29C	10
GO:0043903	regulation of symbiosis, encompassing mutualism through parasitism	20/468	232/17913	3.20478e-06	1.65372e-05	6.82458e-06	BCL2/BST2/MIR130A/ANXA2/MIR222/IL10/MIR221/CAV1/MORC2/NUCKS1/VPS4A/HMGA2/SP1/ILF3/CXCR4/CD36/MIR155/STAU1/TNF/EP300	20
GO:1905332	positive regulation of morphogenesis of an epithelium	8/468	36/17913	3.25162e-06	1.67621e-05	6.91739e-06	TGFB1/VEGFA/CTNNB1/MIR221/AR/BMP4/MTOR/HOXB7	8
GO:0042246	tissue regeneration	11/468	74/17913	3.26336e-06	1.68058e-05	6.93543e-06	SOX2/EZH2/CDKN1A/CDKN1B/MIR199A1/CCNB1/YAP1/MIR29B1/MIR590/EPPK1/PKM	11
GO:0042594	response to starvation	17/468	174/17913	3.27613e-06	1.68547e-05	6.95562e-06	BCL2/CDKN1A/MAPK1/MAPK3/MAPK8/FOXO1/TP53/SIRT1/FOXO3/PRKAA1/SFRP1/NFE2L2/MTOR/SH3GLB1/HSPA5/FAS/ATG7	17
GO:1904950	negative regulation of establishment of protein localization	18/468	193/17913	3.29198e-06	1.69194e-05	6.98231e-06	CARD8/MIR204/MIR24-1/MIR20A/IL33/MIR149/IL10/FN1/MIR148A/MIR29B1/MIR590/MIR128-1/SFRP1/CD36/MAPT/MIR155/TNF/SUFU	18
GO:0033598	mammary gland epithelial cell proliferation	7/468	26/17913	3.39712e-06	1.7425e-05	7.19098e-06	BAX/CCND1/MAPK1/HOXA5/ROBO1/ZNF703/WNT5A	7
GO:1903579	negative regulation of ATP metabolic process	7/468	26/17913	3.39712e-06	1.7425e-05	7.19098e-06	PARP1/STAT3/MIR210/NUPR1/TP53/SNCA/HDAC4	7
GO:0043543	protein acylation	20/468	233/17913	3.42243e-06	1.75374e-05	7.23736e-06	TWIST1/SNAI2/TGFB1/MAPK3/SOX4/WDR5/GSK3B/FOXO1/NUPR1/MIR34A/ATG5/SIRT1/MIR217/IWS1/PRKAA1/SNCA/MAPT/KMT2A/SMAD4/EP300	20
GO:0044003	modification by symbiont of host morphology or physiology	9/468	48/17913	3.5617e-06	1.82329e-05	7.52437e-06	TGFB1/SMAD3/MIR222/MIR221/NTRK3/CASP8/MIR155/ATG7/TYMS	9
GO:0014032	neural crest cell development	10/468	61/17913	3.6798e-06	1.88188e-05	7.76616e-06	TWIST1/SNAI2/MAPK1/MAPK3/FN1/HIF1A/ZEB2/BMP4/SOX11/HES1	10
GO:0050867	positive regulation of cell activation	24/468	319/17913	3.77428e-06	1.92829e-05	7.95766e-06	AKT1/BCL2/CDKN1A/TGFB1/GLI2/CDC42/MIR21/RUNX1/IL33/IL10/CAV1/RUNX3/MEF2C/IL6/MIR128-1/PDPK1/MMP14/HMGB1/MIR142/CCL2/MIR155/IFNG/WNT5A/HES1	24
GO:1990778	protein localization to cell periphery	22/468	276/17913	3.78558e-06	1.93214e-05	7.97358e-06	AKT1/CDH1/VAMP3/TGFB1/CDH2/AR/CAV1/VPS4A/EPB41L3/EGFR/PDPK1/GPC6/PRKCE/MAPK10/MMP14/LRP6/PTCH1/TESC/TNF/IFNG/ITGB1/NKD2	22
GO:0017038	protein import	15/468	140/17913	3.97114e-06	2.02285e-05	8.34791e-06	AKT1/CDH1/CDKN1A/STAT3/TGFB1/MAPK1/SMAD3/TP53/PTGS2/DRD1/MAPK14/CD36/BMP4/IFNG/SUFU	15
GO:0034250	positive regulation of cellular amide metabolic process	15/468	140/17913	3.97114e-06	2.02285e-05	8.34791e-06	VIM/CASP3/MAPK1/MAPK3/SOX4/DHX36/ERBB2/MIR15B/IL6/MIR206/NFE2L2/CDK4/MTOR/C1QBP/TNF	15
GO:0002244	hematopoietic progenitor cell differentiation	16/468	158/17913	3.99272e-06	2.03184e-05	8.38499e-06	BCL2/TGFB1/SOX4/RUNX1/KIT/CDK6/TP53/YAP1/DHX36/NOTCH1/SFRP1/BMP4/SP7/NFE2L2/KMT2A/HES1	16
GO:0050714	positive regulation of protein secretion	21/468	256/17913	4.01075e-06	2.039e-05	8.41455e-06	TWIST1/CARD8/TGFB1/MAPK3/C5/SOX4/IL33/IL10/DHX36/HIF1A/EGFR/IL6/PRKCE/MAPK14/HMGB1/MIR155/MIR182/TNF/TGFB2/FZD5/WNT5A	21
GO:1903427	negative regulation of reactive oxygen species biosynthetic process	8/468	37/17913	4.05456e-06	2.05924e-05	8.49807e-06	MIR181A1/STAT3/MIR199A1/MIR21/IL10/CAV1/MIR590/MIR132	8
GO:0035794	positive regulation of mitochondrial membrane permeability	10/468	62/17913	4.28628e-06	2.17264e-05	8.96608e-06	BAX/BCL2/MAPK8/GSK3B/E2F1/TP53/MIR29B1/CASP8/MIR29A/MIR29C	10
GO:1901862	negative regulation of muscle tissue development	10/468	62/17913	4.28628e-06	2.17264e-05	8.96608e-06	TWIST1/PTEN/MIR199A1/TGFB1/MIR222/MIR200B/MIR590/BMP4/SMAD4/MIR1-1	10
GO:0038083	peptidyl-tyrosine autophosphorylation	6/468	18/17913	4.37786e-06	2.21253e-05	9.1307e-06	VEGFA/MAPK3/IGF1R/CAV1/EGFR/KDR	6
GO:0060749	mammary gland alveolus development	6/468	18/17913	4.37786e-06	2.21253e-05	9.1307e-06	CCND1/VEGFA/FOXF1/HOXA5/HIF1A/AR	6
GO:0061377	mammary gland lobule development	6/468	18/17913	4.37786e-06	2.21253e-05	9.1307e-06	CCND1/VEGFA/FOXF1/HOXA5/HIF1A/AR	6
GO:0010565	regulation of cellular ketone metabolic process	17/468	178/17913	4.46407e-06	2.25389e-05	9.30138e-06	TWIST1/AKT1/ADIPOR1/SLC7A11/MIR204/MIR21/MIR33A/SIRT1/CAV1/PTGS2/PRKCE/SNCA/MIR183/MTOR/MIR182/MIR96/MIR132	17
GO:0060544	regulation of necroptotic process	7/468	27/17913	4.48345e-06	2.26147e-05	9.33264e-06	MIR107/MIR221/CAV1/CASP8/MIR214/MIR155/MIR485	7
GO:1903050	regulation of proteolysis involved in cellular protein catabolic process	18/468	198/17913	4.72711e-06	2.38204e-05	9.83021e-06	AKT1/PTEN/SMAD7/GSK3B/NUPR1/IL33/CAV1/NOP53/MAPK9/PTK2/CCAR2/MDM2/NFE2L2/AURKA/FBXW7/LATS1/SUFU/NKD2	18
GO:2001022	positive regulation of response to DNA damage stimulus	12/468	92/17913	4.79966e-06	2.41624e-05	9.97134e-06	PARP1/MYC/PCNA/SIRT1/HMGA2/EGFR/ACTR2/HMGB1/CCAR2/FUS/FOXM1/ATM	12
GO:0010615	positive regulation of cardiac muscle adaptation	5/468	11/17913	4.83382e-06	2.41926e-05	9.98381e-06	MIR199A1/MIR17/MIR20A/MIR214/MIR155	5
GO:0035404	histone-serine phosphorylation	5/468	11/17913	4.83382e-06	2.41926e-05	9.98381e-06	CCNB1/HMGA2/PRKAA1/DRD1/AURKA	5
GO:0061307	cardiac neural crest cell differentiation involved in heart development	5/468	11/17913	4.83382e-06	2.41926e-05	9.98381e-06	TWIST1/MAPK1/MAPK3/BMP4/HES1	5
GO:0061308	cardiac neural crest cell development involved in heart development	5/468	11/17913	4.83382e-06	2.41926e-05	9.98381e-06	TWIST1/MAPK1/MAPK3/BMP4/HES1	5
GO:1901201	regulation of extracellular matrix assembly	5/468	11/17913	4.83382e-06	2.41926e-05	9.98381e-06	TGFB1/SMAD3/MIR29B1/NOTCH1/HAS2	5
GO:1903244	positive regulation of cardiac muscle hypertrophy in response to stress	5/468	11/17913	4.83382e-06	2.41926e-05	9.98381e-06	MIR199A1/MIR17/MIR20A/MIR214/MIR155	5
GO:0045685	regulation of glial cell differentiation	11/468	77/17913	4.86198e-06	2.43099e-05	1.00322e-05	CDK1/TGFB1/MIR181B1/CTNNB1/NTRK3/NOTCH1/IL6/CXCR4/MIR142/MTOR/HES1	11
GO:0071604	transforming growth factor beta production	8/468	38/17913	5.01937e-06	2.50483e-05	1.03369e-05	SMAD3/MIR149/HIF1A/PTGS2/LTBP3/SMAD4/CREB1/TGFB2	8
GO:1904037	positive regulation of epithelial cell apoptotic process	8/468	38/17913	5.01937e-06	2.50483e-05	1.03369e-05	MIR125A/MIR24-1/PDCD4/FOXO3/IL6/MIR375/CCL2/MIR132	8
GO:0050670	regulation of lymphocyte proliferation	18/468	199/17913	5.07413e-06	2.5297e-05	1.04396e-05	BCL2/CASP3/CDKN1A/TGFB1/MIR21/CTNNB1/IL10/ERBB2/SDC4/MEF2C/IL6/HMGB1/BMP4/RAC2/MIR155/SOX11/ATM/HES1	18
GO:0070741	response to interleukin-6	9/468	50/17913	5.08008e-06	2.53022e-05	1.04417e-05	STAT3/MIRLET7A1/ABCC2/FOXA2/MIR149/MIR125B1/IL6/NFKB1/SMAD4	9
GO:0071706	tumor necrosis factor superfamily cytokine production	16/468	161/17913	5.09838e-06	2.53689e-05	1.04692e-05	MIR181A1/TWIST1/MIR204/MIR130A/MIR149/IL10/MIR125B1/MIR195/MIR206/HMGB1/CD36/MIR488/IFNG/FZD5/WNT5A/MIR132	16
GO:0009266	response to temperature stimulus	19/468	219/17913	5.1346e-06	2.55245e-05	1.05335e-05	AKT1/CDKN1A/ABCC2/MAPK1/MAPK3/GSK3B/FOXO1/FGF1/DHX36/SIRT1/PTGS2/CXCR4/PRKAA1/CCAR2/MAPT/CASP8/MTOR/EP300/ATM	19
GO:1902107	positive regulation of leukocyte differentiation	15/468	143/17913	5.16814e-06	2.56664e-05	1.0592e-05	TGFB1/GLI2/MIR21/RUNX1/RB1/RUNX3/CA2/CSF1/MMP14/HMGB1/CASP8/TESC/TNF/IFNG/CREB1	15
GO:0018210	peptidyl-threonine modification	13/468	109/17913	5.34468e-06	2.64922e-05	1.09328e-05	AKT1/BCL2/CDK1/SMAD7/TGFB1/MAPK1/MAPK8/GSK3B/CADM4/PDPK1/MAP2K1/MTOR/WNT5A	13
GO:0034968	histone lysine methylation	13/468	109/17913	5.34468e-06	2.64922e-05	1.09328e-05	EZH2/KDM1A/SUZ12/WDR5/SUV39H1/CTNNB1/SETD2/SIRT1/ARID4A/DNMT1/IWS1/KMT2A/SMAD4	13
GO:1903076	regulation of protein localization to plasma membrane	12/468	93/17913	5.3823e-06	2.6653e-05	1.09992e-05	AKT1/TGFB1/AR/VPS4A/EGFR/PDPK1/PRKCE/MMP14/TNF/IFNG/ITGB1/NKD2	12
GO:0051302	regulation of cell division	16/468	162/17913	5.52363e-06	2.73266e-05	1.12771e-05	MYC/TGFB1/VEGFA/CDC42/MIR145/YBX1/FGF1/SETD2/VPS4A/POU5F1/PRKCE/FSD1/PTCH1/SH3GLB1/TGFB2/PDGFB	16
GO:0022617	extracellular matrix disassembly	11/468	78/17913	5.52895e-06	2.73267e-05	1.12772e-05	MMP2/MMP9/TGFB1/MMP1/CD44/MMP3/ADAMTS5/TIMP2/IL6/MMP14/FSCN1	11
GO:0043467	regulation of generation of precursor metabolites and energy	15/468	144/17913	5.63329e-06	2.77891e-05	1.1468e-05	AKT1/CDK1/STAT3/ZBTB7A/MIR210/GSK3B/CCNB1/NUPR1/TP53/HIF1A/NOP53/PRKAA1/SNCA/HDAC4/MTOR	15
GO:0061351	neural precursor cell proliferation	15/468	144/17913	5.63329e-06	2.77891e-05	1.1468e-05	NES/KDM1A/TGFB1/VEGFA/CDH2/FGFR1/CTNNB1/FOXO1/TP53/MIR137/HIF1A/FOXO3/POU3F3/ZEB2/WNT5A	15
GO:1905710	positive regulation of membrane permeability	10/468	64/17913	5.76333e-06	2.84034e-05	1.17215e-05	BAX/BCL2/MAPK8/GSK3B/E2F1/TP53/MIR29B1/CASP8/MIR29A/MIR29C	10
GO:0033032	regulation of myeloid cell apoptotic process	7/468	28/17913	5.84416e-06	2.86921e-05	1.18407e-05	BCL2/PTEN/SLC7A11/CDKN2A/SIRT1/PIK3CB/MEF2C	7
GO:0045737	positive regulation of cyclin-dependent protein serine/threonine kinase activity	7/468	28/17913	5.84416e-06	2.86921e-05	1.18407e-05	AKT1/CCND1/CDKN1B/CCNB1/EGFR/CCND2/PDGFB	7
GO:1900543	negative regulation of purine nucleotide metabolic process	7/468	28/17913	5.84416e-06	2.86921e-05	1.18407e-05	PARP1/STAT3/MIR210/NUPR1/TP53/SNCA/HDAC4	7
GO:1990776	response to angiotensin	7/468	28/17913	5.84416e-06	2.86921e-05	1.18407e-05	MIR143/MIR145/CAV1/PTGS2/NFKB1/CA2/NFE2L2	7
GO:0031032	actomyosin structure organization	16/468	163/17913	5.98034e-06	2.93327e-05	1.2105e-05	CDC42/MIR21/MIR20A/SMAD3/MIR149/SDC4/VPS4A/MEF2C/LPAR1/SFRP1/PXN/MTOR/SMAD4/MIR138-1/MIR1-1/ITGB1	16
GO:0001954	positive regulation of cell-matrix adhesion	9/468	51/17913	6.02754e-06	2.948e-05	1.21658e-05	VEGFA/GSK3B/SMAD3/CDK6/SDC4/CSF1/SFRP1/CD36/KDR	9
GO:0045620	negative regulation of lymphocyte differentiation	9/468	51/17913	6.02754e-06	2.948e-05	1.21658e-05	SMAD7/MIR21/RUNX1/ERBB2/RUNX3/SFRP1/HMGB1/BMP4/MIR155	9
GO:0050999	regulation of nitric-oxide synthase activity	9/468	51/17913	6.02754e-06	2.948e-05	1.21658e-05	AKT1/TERT/HIF1A/CAV1/EGFR/MIR138-1/WASL/TNF/MIR132	9
GO:0003298	physiological muscle hypertrophy	8/468	39/17913	6.17161e-06	3.00706e-05	1.24095e-05	MIR199A1/MIR24-1/MIR23A/MIR23B/MIR19A/MIR195/MIR19B1/MTOR	8
GO:0003301	physiological cardiac muscle hypertrophy	8/468	39/17913	6.17161e-06	3.00706e-05	1.24095e-05	MIR199A1/MIR24-1/MIR23A/MIR23B/MIR19A/MIR195/MIR19B1/MTOR	8
GO:0061049	cell growth involved in cardiac muscle cell development	8/468	39/17913	6.17161e-06	3.00706e-05	1.24095e-05	MIR199A1/MIR24-1/MIR23A/MIR23B/MIR19A/MIR195/MIR19B1/MTOR	8
GO:0071548	response to dexamethasone	8/468	39/17913	6.17161e-06	3.00706e-05	1.24095e-05	CASP9/ABCC2/TGFB1/PCNA/FOXO1/EIF4E/EGFR/FOXO3	8
GO:0003159	morphogenesis of an endothelium	6/468	19/17913	6.25765e-06	3.03135e-05	1.25098e-05	MIR21/CTNNB1/FGF1/CXCR4/ADAMTS12/BMP4	6
GO:0010663	positive regulation of striated muscle cell apoptotic process	6/468	19/17913	6.25765e-06	3.03135e-05	1.25098e-05	PTEN/MIR17/MIR34A/TP53/MIR195/MIR320A	6
GO:0010666	positive regulation of cardiac muscle cell apoptotic process	6/468	19/17913	6.25765e-06	3.03135e-05	1.25098e-05	PTEN/MIR17/MIR34A/TP53/MIR195/MIR320A	6
GO:0061154	endothelial tube morphogenesis	6/468	19/17913	6.25765e-06	3.03135e-05	1.25098e-05	MIR21/CTNNB1/FGF1/CXCR4/ADAMTS12/BMP4	6
GO:1903798	regulation of production of miRNAs involved in gene silencing by miRNA	6/468	19/17913	6.25765e-06	3.03135e-05	1.25098e-05	TGFB1/TP53/EGFR/MAP2K1/MAP2K2/BMP4	6
GO:2000774	positive regulation of cellular senescence	6/468	19/17913	6.25765e-06	3.03135e-05	1.25098e-05	CDKN2A/MIR34A/SIRT1/MIR217/HMGA2/MIR146A	6
GO:0032642	regulation of chemokine production	11/468	79/17913	6.2744e-06	3.03135e-05	1.25098e-05	TWIST1/SNAI2/C5/IL33/IL10/HIF1A/MIR590/IL6/MIR155/TNF/WNT5A	11
GO:0042509	regulation of tyrosine phosphorylation of STAT protein	11/468	79/17913	6.2744e-06	3.03135e-05	1.25098e-05	STAT3/KIT/MIR221/CAV1/MIR19A/MIR19B1/IL6/MIR146A/TNF/IFNG/HES1	11
GO:2001021	negative regulation of response to DNA damage stimulus	11/468	79/17913	6.2744e-06	3.03135e-05	1.25098e-05	TWIST1/BCL2/SNAI1/SNAI2/KDM1A/CD44/MIR221/SIRT1/HMGA2/CCAR2/MDM2	11
GO:0060759	regulation of response to cytokine stimulus	17/468	183/17913	6.48584e-06	3.13057e-05	1.29193e-05	CARD8/MIRLET7A1/MIR21/MIR24-1/RUNX1/MIR152/HIF1A/CAV1/MIR125B1/IL6/CSF1/ROBO1/CASP8/MIR138-1/TNF/IFNG/WNT5A	17
GO:0010639	negative regulation of organelle organization	25/468	352/17913	6.56498e-06	3.16581e-05	1.30647e-05	TWIST1/AKT1/PARP1/KDM1A/MIR21/MIR20A/CCNB1/NUPR1/MIR149/TP53/ATG5/SIRT1/DNMT1/SNCA/MAPT/BMP4/UBE2B/MIR214/MIR155/CDT1/SMAD4/MIR138-1/MIR182/ATM/ATG7	25
GO:0051235	maintenance of location	22/468	286/17913	6.71447e-06	3.23487e-05	1.33497e-05	AKT1/BAX/TGFB1/IL10/ATG5/CACNA1C/SIRT1/CAV1/EPB41L3/IL6/NFKB1/PDPK1/ABCA1/DRD1/PRKCE/SNCA/CD36/FBXW7/TNF/HSPA5/LATS1/MIR1-1	22
GO:0006909	phagocytosis	23/468	308/17913	6.79044e-06	3.26841e-05	1.34881e-05	PTEN/TGFB1/MAPK1/MAPK3/CDC42/MIR181B1/MIR17/MIR20A/ATG5/PIK3CB/ACTR2/ABCA1/PRKCE/PTK2/HMGB1/CCL2/CD36/ATG3/MIR155/WASL/TNF/BCR/ITGB1	23
GO:0046651	lymphocyte proliferation	20/468	244/17913	6.87227e-06	3.30471e-05	1.36379e-05	BAX/BCL2/CASP3/CDKN1A/TGFB1/MIR21/CTNNB1/TP53/IL10/ERBB2/SDC4/MEF2C/IL6/HMGB1/BMP4/RAC2/MIR155/SOX11/ATM/HES1	20
GO:2001023	regulation of response to drug	11/468	80/17913	7.10602e-06	3.41394e-05	1.40887e-05	MIR21/MIR17/MIR34A/IL10/HMGA2/FOXO3/DRD1/SNCA/NFE2L2/MIR155/KMT2A	11
GO:0009743	response to carbohydrate	19/468	224/17913	7.12341e-06	3.4191e-05	1.411e-05	CASP3/PTEN/SMAD2/CDKN1B/TGFB1/RAF1/SOX4/FOXA2/MIR221/HIF1A/ANGPT2/PTGS2/FOXO3/PRKAA1/PRKCE/RAP1B/CDT1/MIR146A/ATG7	19
GO:0006006	glucose metabolic process	18/468	204/17913	7.178e-06	3.4421e-05	1.42049e-05	AKT1/ADIPOR1/WDR5/MIR210/GSK3B/TFF3/FOXO1/FOXA2/SIK1/MIR107/TP53/SIRT1/PRKAA1/MAPK14/MTOR/TNF/PKM/EP300	18
GO:0048839	inner ear development	17/468	185/17913	7.5016e-06	3.58887e-05	1.48106e-05	SOX2/ZEB1/CDKN1B/TGFB1/GLI2/FGFR1/ATG5/HOXA1/SDC4/NTRK3/CTHRC1/BMPER/BMP4/TGFB2/BCR/WNT5A/HES1	17
GO:0045940	positive regulation of steroid metabolic process	7/468	29/17913	7.53134e-06	3.58887e-05	1.48106e-05	FGF1/PRKAA1/MIR183/MIR182/TNF/IFNG/MIR96	7
GO:0045980	negative regulation of nucleotide metabolic process	7/468	29/17913	7.53134e-06	3.58887e-05	1.48106e-05	PARP1/STAT3/MIR210/NUPR1/TP53/SNCA/HDAC4	7
GO:0070723	response to cholesterol	7/468	29/17913	7.53134e-06	3.58887e-05	1.48106e-05	SMAD2/TGFB1/ABCA1/LRP6/PTCH1/MIR182/MIR96	7
GO:0071480	cellular response to gamma radiation	7/468	29/17913	7.53134e-06	3.58887e-05	1.48106e-05	KDM1A/CDKN1A/TP53/YAP1/MDM2/HSPA5/ATM	7
GO:0032692	negative regulation of interleukin-1 production	8/468	40/17913	7.53976e-06	3.58887e-05	1.48106e-05	MIR181A1/CARD8/MIR204/IL10/MIR195/MIR155/MIR488/MIR132	8
GO:0040019	positive regulation of embryonic development	8/468	40/17913	7.53976e-06	3.58887e-05	1.48106e-05	CTNNB1/FOXA2/AR/MIR150/MIR200C/AMOT/MIR1-1/HES1	8
GO:0042036	negative regulation of cytokine biosynthetic process	8/468	40/17913	7.53976e-06	3.58887e-05	1.48106e-05	MIR181A1/MIR204/IL10/MIR195/IL6/NFKB1/MIR155/MIR488	8
GO:0021543	pallium development	16/468	166/17913	7.55997e-06	3.59517e-05	1.48366e-05	BAX/CASP3/PTEN/EZH2/KDM1A/CDH2/CTNNB1/GSK3B/CDK6/HIF1A/EGFR/POU3F3/ZEB2/DRD1/ROBO1/CRKL	16
GO:0045806	negative regulation of endocytosis	10/468	66/17913	7.66179e-06	3.64023e-05	1.50225e-05	PTEN/MIR199A1/TGFB1/MIR181B1/MIR17/ATG5/CAV1/HMGB1/ATG3/MIR27B	10
GO:0001889	liver development	14/468	130/17913	7.82699e-06	3.7153e-05	1.53323e-05	CCND1/EZH2/IGF2R/TGFB1/PCNA/SMAD3/IL10/EGFR/AURKA/PTCH1/FBXW7/PKM/HES1/TYMS	14
GO:0030183	B cell differentiation	13/468	113/17913	7.98334e-06	3.78255e-05	1.56098e-05	BAX/BCL2/ZBTB7A/KIT/TP53/IL10/SFRP1/MMP14/HDAC4/NOTCH2/EP300/ATM/ITGB1	13
GO:1904375	regulation of protein localization to cell periphery	13/468	113/17913	7.98334e-06	3.78255e-05	1.56098e-05	AKT1/TGFB1/AR/VPS4A/EGFR/PDPK1/GPC6/PRKCE/MMP14/TNF/IFNG/ITGB1/NKD2	13
GO:0045682	regulation of epidermis development	11/468	81/17913	8.03209e-06	3.79518e-05	1.5662e-05	EZH2/RUNX1/CTNNB1/HOXA7/BMP4/SMAD4/PTCH1/TNF/TGFB2/WNT5A/HES1	11
GO:0061053	somite development	11/468	81/17913	8.03209e-06	3.79518e-05	1.5662e-05	SMAD3/FOXF1/TP53/ZEB2/SFRP1/SMAD4/PTCH1/SOX11/EP300/ATM/WNT5A	11
GO:1902930	regulation of alcohol biosynthetic process	11/468	81/17913	8.03209e-06	3.79518e-05	1.5662e-05	FGF1/FASN/SP1/NFKB1/PRKAA1/SNCA/MIR183/MIR182/TNF/IFNG/MIR96	11
GO:0042368	vitamin D biosynthetic process	5/468	12/17913	8.10865e-06	3.82434e-05	1.57823e-05	SNAI1/SNAI2/NFKB1/TNF/IFNG	5
GO:1900376	regulation of secondary metabolite biosynthetic process	5/468	12/17913	8.10865e-06	3.82434e-05	1.57823e-05	SLC7A11/MIR21/SP1/ZEB2/WNT5A	5
GO:0032964	collagen biosynthetic process	9/468	53/17913	8.38308e-06	3.94655e-05	1.62867e-05	VIM/TGFB1/MIR218-1/MIR145/MIR149/MIR29B1/IL6/BMP4/MIR29A	9
GO:0045747	positive regulation of Notch signaling pathway	9/468	53/17913	8.38308e-06	3.94655e-05	1.62867e-05	STAT3/KIT/MIR126/MAML1/NOTCH1/ROBO1/EP300/TGFB2/HES1	9
GO:0035264	multicellular organism growth	15/468	149/17913	8.56627e-06	4.02912e-05	1.66274e-05	BCL2/KLF2/STAT3/TP53/CDKN1C/HOXA5/AR/ANKRD11/CSF1/CDK4/MTOR/PTCH1/CREB1/EP300/ATM	15
GO:0002320	lymphoid progenitor cell differentiation	6/468	20/17913	8.74293e-06	4.10098e-05	1.6924e-05	BCL2/SOX4/KIT/NOTCH1/BMP4/HES1	6
GO:0030878	thyroid gland development	6/468	20/17913	8.74293e-06	4.10098e-05	1.6924e-05	MAPK1/MAPK3/RAF1/SMAD3/HOXA5/MAP2K1	6
GO:0034393	positive regulation of smooth muscle cell apoptotic process	6/468	20/17913	8.74293e-06	4.10098e-05	1.6924e-05	MIR24-1/PDCD4/CDKN2A/MIR140/IFNG/MIR1-1	6
GO:0010812	negative regulation of cell-substrate adhesion	10/468	67/17913	8.79849e-06	4.11955e-05	1.70006e-05	PTEN/CDKN2A/MIR939/ANGPT2/HOXA7/NOTCH1/MMP14/MIR29C/MIR503/SERPINE1	10
GO:0070227	lymphocyte apoptotic process	10/468	67/17913	8.79849e-06	4.11955e-05	1.70006e-05	AKT1/BAX/PTEN/BIRC7/TP53/IL10/HIF1A/BMP4/CRKL/WNT5A	10
GO:0007260	tyrosine phosphorylation of STAT protein	11/468	82/17913	9.06151e-06	4.235e-05	1.7477e-05	STAT3/KIT/MIR221/CAV1/MIR19A/MIR19B1/IL6/MIR146A/TNF/IFNG/HES1	11
GO:0032651	regulation of interleukin-1 beta production	11/468	82/17913	9.06151e-06	4.235e-05	1.7477e-05	MIR181A1/CARD8/MIR204/SMAD3/MIR195/MIR206/MIR155/MIR488/FZD5/WNT5A/MIR132	11
GO:0031057	negative regulation of histone modification	8/468	41/17913	9.15544e-06	4.2673e-05	1.76103e-05	TWIST1/KDM1A/ATG5/SIRT1/DNMT1/SNCA/UBE2B/MIR182	8
GO:1901985	positive regulation of protein acetylation	8/468	41/17913	9.15544e-06	4.2673e-05	1.76103e-05	SNAI2/TGFB1/MAPK3/SOX4/MIR34A/MIR217/PRKAA1/SMAD4	8
GO:1903053	regulation of extracellular matrix organization	8/468	41/17913	9.15544e-06	4.2673e-05	1.76103e-05	TGFB1/SMAD3/RB1/MIR29B1/NOTCH1/IL6/FSCN1/HAS2	8
GO:0010522	regulation of calcium ion transport into cytosol	12/468	98/17913	9.32864e-06	4.3441e-05	1.79272e-05	BAX/BCL2/TGFB1/ATG5/CACNA1C/CAV1/PDPK1/DRD1/PRKCE/SNCA/CALCR/MIR1-1	12
GO:0050715	positive regulation of cytokine secretion	14/468	132/17913	9.3487e-06	4.34951e-05	1.79496e-05	TWIST1/CARD8/MAPK3/C5/IL33/IL10/DHX36/MAPK14/HMGB1/MIR155/MIR182/TNF/FZD5/WNT5A	14
GO:0061082	myeloid leukocyte cytokine production	7/468	30/17913	9.60381e-06	4.46015e-05	1.84062e-05	TGFB1/KIT/DHX36/SIRT1/CD36/TGFB2/WNT5A	7
GO:2000142	regulation of DNA-templated transcription, initiation	7/468	30/17913	9.60381e-06	4.46015e-05	1.84062e-05	TWIST1/CTNNB1/TP53/DHX36/HMGB1/CREB1/MIRLET7I	7
GO:0042304	regulation of fatty acid biosynthetic process	9/468	54/17913	9.82971e-06	4.55685e-05	1.88052e-05	ADIPOR1/MIR204/MIR33A/SIRT1/PTGS2/MIR183/MIR182/MIR96/MIR132	9
GO:0070830	bicellular tight junction assembly	9/468	54/17913	9.82971e-06	4.55685e-05	1.88052e-05	SNAI1/SNAI2/RUNX1/TJP1/CLDN5/OCLN/MIR155/TNF/FZD5	9
GO:0090596	sensory organ morphogenesis	20/468	250/17913	9.8645e-06	4.56887e-05	1.88548e-05	TWIST1/BAX/BCL2/ZEB1/STAT3/VEGFA/MAPK1/MAPK3/GLI2/FGFR1/CTNNB1/HIF1A/HOXA1/CTHRC1/BMP4/PROM1/SOX11/BCR/FZD5/WNT5A	20
GO:0051224	negative regulation of protein transport	17/468	189/17913	9.97066e-06	4.61389e-05	1.90406e-05	CARD8/MIR204/MIR24-1/MIR20A/IL33/MIR149/IL10/FN1/MIR148A/MIR29B1/MIR590/MIR128-1/SFRP1/CD36/MIR155/TNF/SUFU	17
GO:0071674	mononuclear cell migration	10/468	68/17913	1.00779e-05	4.65932e-05	1.92281e-05	TGFB1/MAPK3/IL6/CSF1/MAPK14/HMGB1/CCL2/SERPINE1/TNF/PDGFB	10
GO:0061008	hepaticobiliary system development	14/468	133/17913	1.02034e-05	4.70912e-05	1.94336e-05	CCND1/EZH2/IGF2R/TGFB1/PCNA/SMAD3/IL10/EGFR/AURKA/PTCH1/FBXW7/PKM/HES1/TYMS	14
GO:0051492	regulation of stress fiber assembly	11/468	83/17913	1.02039e-05	4.70912e-05	1.94336e-05	CDC42/MIR21/MIR20A/SMAD3/MIR149/SDC4/LPAR1/SFRP1/PXN/MTOR/MIR138-1	11
GO:0001959	regulation of cytokine-mediated signaling pathway	16/468	170/17913	1.02421e-05	4.72255e-05	1.94891e-05	CARD8/MIRLET7A1/MIR21/MIR24-1/RUNX1/MIR152/HIF1A/CAV1/MIR125B1/IL6/CSF1/ROBO1/CASP8/TNF/IFNG/WNT5A	16
GO:1903362	regulation of cellular protein catabolic process	19/468	230/17913	1.04097e-05	4.79551e-05	1.97901e-05	AKT1/PTEN/SMAD7/GSK3B/NUPR1/IL33/ANXA2/CAV1/NOP53/MAPK9/PTK2/CCAR2/MDM2/NFE2L2/AURKA/FBXW7/LATS1/SUFU/NKD2	19
GO:0051701	interaction with host	18/468	211/17913	1.14386e-05	5.26484e-05	2.1727e-05	CDH1/CDK1/ACE2/TGFB1/CTNNB1/SMAD3/MIR222/MIR221/CAV1/VPS4A/NTRK3/EGFR/CXCR4/CASP8/MIR155/ATG7/TYMS/ITGB1	18
GO:0001776	leukocyte homeostasis	11/468	84/17913	1.14694e-05	5.27429e-05	2.1766e-05	AKT1/BAX/BCL2/CASP3/TGFB1/SLC7A11/HIF1A/PIK3CB/MEF2C/IL6/HMGB1	11
GO:0120192	tight junction assembly	9/468	55/17913	1.14843e-05	5.27643e-05	2.17748e-05	SNAI1/SNAI2/RUNX1/TJP1/CLDN5/OCLN/MIR155/TNF/FZD5	9
GO:0032720	negative regulation of tumor necrosis factor production	10/468	69/17913	1.15146e-05	5.28092e-05	2.17934e-05	MIR181A1/TWIST1/MIR204/MIR130A/MIR149/IL10/MIR125B1/MIR195/MIR488/MIR132	10
GO:0033077	T cell differentiation in thymus	10/468	69/17913	1.15146e-05	5.28092e-05	2.17934e-05	BCL2/ZEB1/GLI2/CTNNB1/CDK6/TP53/ATG5/ERBB2/BMP4/FZD5	10
GO:0034605	cellular response to heat	13/468	117/17913	1.17096e-05	5.36561e-05	2.21428e-05	CDKN1A/MAPK1/MAPK3/GSK3B/FGF1/DHX36/SIRT1/PTGS2/CCAR2/MAPT/MTOR/EP300/ATM	13
GO:0007249	I-kappaB kinase/NF-kappaB signaling	20/468	253/17913	1.17631e-05	5.38531e-05	2.22241e-05	AKT1/CARD8/BST2/CTNNB1/MIR497/DHX36/SIRT1/TNFRSF10B/MIR15B/TNFSF10/LTBR/UBE2I/MIR195/PDPK1/LPAR1/PRKCE/CD36/CASP8/TNF/WNT5A	20
GO:0006925	inflammatory cell apoptotic process	6/468	21/17913	1.19711e-05	5.45631e-05	2.25171e-05	SLC7A11/CDKN2A/SIRT1/PIK3CB/MEF2C/IL6	6
GO:0010985	negative regulation of lipoprotein particle clearance	6/468	21/17913	1.19711e-05	5.45631e-05	2.25171e-05	MIR199A1/MIR17/MIR148A/MIR128-1/MIR155/MIR27B	6
GO:0050765	negative regulation of phagocytosis	6/468	21/17913	1.19711e-05	5.45631e-05	2.25171e-05	PTEN/TGFB1/MIR181B1/ATG5/HMGB1/ATG3	6
GO:0055093	response to hyperoxia	6/468	21/17913	1.19711e-05	5.45631e-05	2.25171e-05	CDKN1A/FOXO1/CAV1/CDK4/FAS/ATG7	6
GO:2000144	positive regulation of DNA-templated transcription, initiation	6/468	21/17913	1.19711e-05	5.45631e-05	2.25171e-05	TWIST1/CTNNB1/TP53/DHX36/CREB1/MIRLET7I	6
GO:0002793	positive regulation of peptide secretion	21/468	275/17913	1.21246e-05	5.48883e-05	2.26514e-05	TWIST1/CARD8/TGFB1/MAPK3/C5/SOX4/IL33/IL10/DHX36/HIF1A/EGFR/IL6/PRKCE/MAPK14/HMGB1/MIR155/MIR182/TNF/TGFB2/FZD5/WNT5A	21
GO:0010591	regulation of lamellipodium assembly	7/468	31/17913	1.21276e-05	5.48883e-05	2.26514e-05	CDC42/MIR196A1/RAC2/MIR214/HDAC4/FSCN1/MTOR	7
GO:0030513	positive regulation of BMP signaling pathway	7/468	31/17913	1.21276e-05	5.48883e-05	2.26514e-05	SMAD2/NOTCH1/MIR140/BMP4/SMAD4/SOX11/HES1	7
GO:1902230	negative regulation of intrinsic apoptotic signaling pathway in response to DNA damage	7/468	31/17913	1.21276e-05	5.48883e-05	2.26514e-05	BCL2/SNAI1/SNAI2/KDM1A/CD44/SIRT1/CCAR2	7
GO:1902253	regulation of intrinsic apoptotic signaling pathway by p53 class mediator	7/468	31/17913	1.21276e-05	5.48883e-05	2.26514e-05	BCL2/KDM1A/MIR21/CD44/TP53/SIRT1/MDM2	7
GO:1902692	regulation of neuroblast proliferation	7/468	31/17913	1.21276e-05	5.48883e-05	2.26514e-05	KDM1A/TGFB1/VEGFA/CTNNB1/TP53/MIR137/HIF1A	7
GO:1903205	regulation of hydrogen peroxide-induced cell death	7/468	31/17913	1.21276e-05	5.48883e-05	2.26514e-05	MIR21/MIR17/MIR34A/IL10/FOXO3/NFE2L2/MIR155	7
GO:1903978	regulation of microglial cell activation	7/468	31/17913	1.21276e-05	5.48883e-05	2.26514e-05	IL6/MIR128-1/MIR124-1/MIR142/MIR155/TNF/ATM	7
GO:0042475	odontogenesis of dentin-containing tooth	11/468	85/17913	1.28691e-05	5.79492e-05	2.39145e-05	BAX/RUNX2/GLI2/CTNNB1/FOXO1/ANKRD11/CA2/CSF1/BMP4/SERPINE1/WNT6	11
GO:0007183	SMAD protein complex assembly	5/468	13/17913	1.28938e-05	5.79492e-05	2.39145e-05	PARP1/SMAD2/TGFB1/SMAD3/SMAD4	5
GO:0030656	regulation of vitamin metabolic process	5/468	13/17913	1.28938e-05	5.79492e-05	2.39145e-05	SNAI1/SNAI2/NFKB1/TNF/IFNG	5
GO:0033127	regulation of histone phosphorylation	5/468	13/17913	1.28938e-05	5.79492e-05	2.39145e-05	TWIST1/MAPK3/CCNB1/UBE2B/ATM	5
GO:0048308	organelle inheritance	5/468	13/17913	1.28938e-05	5.79492e-05	2.39145e-05	CDK1/MAPK1/MAPK3/MAP2K1/MAP2K2	5
GO:0048313	Golgi inheritance	5/468	13/17913	1.28938e-05	5.79492e-05	2.39145e-05	CDK1/MAPK1/MAPK3/MAP2K1/MAP2K2	5
GO:0060576	intestinal epithelial cell development	5/468	13/17913	1.28938e-05	5.79492e-05	2.39145e-05	CDKN1A/HOXA5/HIF1A/MIR29B1/TYMS	5
GO:1905651	regulation of artery morphogenesis	5/468	13/17913	1.28938e-05	5.79492e-05	2.39145e-05	MIR205/MIR29B1/MIR153-1/AKT3/MIR495	5
GO:0042771	intrinsic apoptotic signaling pathway in response to DNA damage by p53 class mediator	8/468	43/17913	1.32728e-05	5.94451e-05	2.45318e-05	BCL2/KDM1A/CDKN1A/CD44/NUPR1/TP53/SIRT1/EP300	8
GO:1902743	regulation of lamellipodium organization	8/468	43/17913	1.32728e-05	5.94451e-05	2.45318e-05	CDC42/CD44/MIR196A1/RAC2/MIR214/HDAC4/FSCN1/MTOR	8
GO:1990090	cellular response to nerve growth factor stimulus	8/468	43/17913	1.32728e-05	5.94451e-05	2.45318e-05	AKT1/PTEN/E2F1/FOXO3/PDPK1/MAPT/HSPA5/CREB1	8
GO:2001239	regulation of extrinsic apoptotic signaling pathway in absence of ligand	8/468	43/17913	1.32728e-05	5.94451e-05	2.45318e-05	AKT1/BCL2/SNAI2/TERT/FGFR1/MCL1/WWOX/TNF	8
GO:0032640	tumor necrosis factor production	15/468	155/17913	1.38232e-05	6.18028e-05	2.55048e-05	MIR181A1/TWIST1/MIR204/MIR130A/MIR149/IL10/MIR125B1/MIR195/MIR206/HMGB1/CD36/MIR488/FZD5/WNT5A/MIR132	15
GO:1903555	regulation of tumor necrosis factor superfamily cytokine production	15/468	155/17913	1.38232e-05	6.18028e-05	2.55048e-05	MIR181A1/TWIST1/MIR204/MIR130A/MIR149/IL10/MIR125B1/MIR195/MIR206/CD36/MIR488/IFNG/FZD5/WNT5A/MIR132	15
GO:1903039	positive regulation of leukocyte cell-cell adhesion	18/468	214/17913	1.38742e-05	6.19772e-05	2.55768e-05	AKT1/TGFB1/GLI2/CDC42/MIR21/RUNX1/CD44/CAV1/RUNX3/IL6/PDPK1/HMGB1/CCL2/MIR155/HAS2/TNF/IFNG/HES1	18
GO:0032602	chemokine production	11/468	86/17913	1.44149e-05	6.43364e-05	2.65504e-05	TWIST1/SNAI2/C5/IL33/IL10/HIF1A/MIR590/IL6/MIR155/TNF/WNT5A	11
GO:1903556	negative regulation of tumor necrosis factor superfamily cytokine production	10/468	71/17913	1.49243e-05	6.65524e-05	2.74649e-05	MIR181A1/TWIST1/MIR204/MIR130A/MIR149/IL10/MIR125B1/MIR195/MIR488/MIR132	10
GO:0009746	response to hexose	17/468	195/17913	1.50443e-05	6.70297e-05	2.76618e-05	CASP3/PTEN/SMAD2/CDKN1B/TGFB1/RAF1/SOX4/FOXA2/MIR221/HIF1A/ANGPT2/PTGS2/FOXO3/PRKAA1/PRKCE/MIR146A/ATG7	17
GO:0040036	regulation of fibroblast growth factor receptor signaling pathway	7/468	32/17913	1.51764e-05	6.75018e-05	2.78567e-05	RUNX2/MIR424/CTNNB1/MIR503/MIR146A/WNT5A/MIR1-1	7
GO:0071276	cellular response to cadmium ion	7/468	32/17913	1.51764e-05	6.75018e-05	2.78567e-05	AKT1/MMP9/MAPK1/MAPK3/MAPK8/EGFR/MAPK9	7
GO:0035904	aorta development	9/468	57/17913	1.5515e-05	6.89482e-05	2.84536e-05	MIR205/SOX4/MIR143/MIR145/MIR29B1/ROBO1/TGFB2/SUFU/HES1	9
GO:0010770	positive regulation of cell morphogenesis involved in differentiation	14/468	138/17913	1.56006e-05	6.92689e-05	2.85859e-05	VEGFA/BDNF/CDC42/FN1/DHX36/NTRK3/ZEB2/ACTR2/ROBO1/MAP2K1/MAPT/C1QBP/HAS2/CRKL	14
GO:0009755	hormone-mediated signaling pathway	18/468	216/17913	1.57461e-05	6.98545e-05	2.88276e-05	PAGR1/PARP1/LATS2/ADIPOR1/RUNX1/ZBTB7A/CTNNB1/CCNE1/YAP1/AR/SIRT1/RB1/HNF4G/SFRP1/BMP4/ESRRA/LATS1/EP300	18
GO:0072659	protein localization to plasma membrane	19/468	237/17913	1.59216e-05	7.05724e-05	2.91238e-05	AKT1/CDH1/VAMP3/TGFB1/CDH2/AR/VPS4A/EPB41L3/EGFR/PDPK1/PRKCE/MMP14/LRP6/PTCH1/TESC/TNF/IFNG/ITGB1/NKD2	19
GO:0006309	apoptotic DNA fragmentation	6/468	22/17913	1.60986e-05	7.11735e-05	2.93719e-05	BAX/CASP3/APAF1/IL6/HMGB1/MIR146A	6
GO:0010988	regulation of low-density lipoprotein particle clearance	6/468	22/17913	1.60986e-05	7.11735e-05	2.93719e-05	MIR199A1/MIR17/ANXA2/MIR148A/MIR155/MIR27B	6
GO:0042359	vitamin D metabolic process	6/468	22/17913	1.60986e-05	7.11735e-05	2.93719e-05	SNAI1/SNAI2/FGFR1/NFKB1/TNF/IFNG	6
GO:0002687	positive regulation of leukocyte migration	13/468	121/17913	1.68873e-05	7.45324e-05	3.07581e-05	TGFB1/VEGFA/MAPK3/IL6/CSF1/MAPK14/MMP14/HMGB1/RAC2/SERPINE1/C1QBP/TNF/WNT5A	13
GO:0072655	establishment of protein localization to mitochondrion	13/468	121/17913	1.68873e-05	7.45324e-05	3.07581e-05	AKT1/BAX/BCL2/MAPK8/E2F1/TP53/PRKAA1/MAPT/CASP8/RAC2/SH3GLB1/FBXW7/FZD5	13
GO:0050710	negative regulation of cytokine secretion	10/468	72/17913	1.69325e-05	7.46426e-05	3.08035e-05	CARD8/MIR204/MIR24-1/MIR20A/MIR149/IL10/FN1/MIR590/MIR155/TNF	10
GO:0060968	regulation of gene silencing	14/468	139/17913	1.69412e-05	7.46426e-05	3.08035e-05	STAT3/CDK2/TGFB1/TERT/TP53/SIRT1/DNMT1/MORC2/EGFR/POU5F1/NEAT1/MAP2K1/MAP2K2/BMP4	14
GO:0050868	negative regulation of T cell activation	12/468	104/17913	1.7235e-05	7.58723e-05	3.1311e-05	CASP3/SMAD7/TGFB1/MIR21/RUNX1/IL10/ERBB2/RUNX3/SDC4/HMGB1/BMP4/MIR155	12
GO:0009408	response to heat	15/468	158/17913	1.73959e-05	7.65154e-05	3.15764e-05	AKT1/CDKN1A/ABCC2/MAPK1/MAPK3/GSK3B/FGF1/DHX36/SIRT1/PTGS2/CCAR2/MAPT/MTOR/EP300/ATM	15
GO:0007006	mitochondrial membrane organization	13/468	122/17913	1.84598e-05	8.09874e-05	3.34219e-05	BAX/BCL2/STAT3/MAPK8/MIR17/GSK3B/E2F1/TP53/MIR29B1/SNCA/CASP8/MIR29A/MIR29C	13
GO:0018022	peptidyl-lysine methylation	13/468	122/17913	1.84598e-05	8.09874e-05	3.34219e-05	EZH2/KDM1A/SUZ12/WDR5/SUV39H1/CTNNB1/SETD2/SIRT1/ARID4A/DNMT1/IWS1/KMT2A/SMAD4	13
GO:0034763	negative regulation of transmembrane transport	13/468	122/17913	1.84598e-05	8.09874e-05	3.34219e-05	TWIST1/AKT1/PTEN/MMP9/TGFB1/MIR143/MIR107/CAV1/PRKCE/MTOR/TNF/MIR153-1/MIR1-1	13
GO:0006308	DNA catabolic process	7/468	33/17913	1.88321e-05	8.21975e-05	3.39213e-05	BAX/CASP3/APAF1/IL6/HMGB1/MIR146A/ATM	7
GO:0036314	response to sterol	7/468	33/17913	1.88321e-05	8.21975e-05	3.39213e-05	SMAD2/TGFB1/ABCA1/LRP6/PTCH1/MIR182/MIR96	7
GO:1901890	positive regulation of cell junction assembly	7/468	33/17913	1.88321e-05	8.21975e-05	3.39213e-05	ACE2/VEGFA/SMAD3/CAV1/SDC4/SFRP1/KDR	7
GO:0010463	mesenchymal cell proliferation	8/468	45/17913	1.88472e-05	8.21975e-05	3.39213e-05	MYC/ZEB1/VEGFA/FGFR1/CTNNB1/FOXF1/BMP4/WNT5A	8
GO:0014014	negative regulation of gliogenesis	8/468	45/17913	1.88472e-05	8.21975e-05	3.39213e-05	TERT/MIR181B1/CTNNB1/NTRK3/NOTCH1/MIR146A/SOX11/HES1	8
GO:0045581	negative regulation of T cell differentiation	8/468	45/17913	1.88472e-05	8.21975e-05	3.39213e-05	SMAD7/MIR21/RUNX1/ERBB2/RUNX3/HMGB1/BMP4/MIR155	8
GO:0050922	negative regulation of chemotaxis	8/468	45/17913	1.88472e-05	8.21975e-05	3.39213e-05	C5/MIR424/MIR34A/ANGPT2/NOTCH1/ROBO1/CCL2/WNT5A	8
GO:0003208	cardiac ventricle morphogenesis	10/468	73/17913	1.91687e-05	8.34585e-05	3.44417e-05	SMAD7/TGFB1/SOX4/FOXF1/HIF1A/MEF2C/NOTCH1/SMAD4/SOX11/TGFB2	10
GO:0061045	negative regulation of wound healing	10/468	73/17913	1.91687e-05	8.34585e-05	3.44417e-05	PTEN/KRT1/CDKN1A/CDKN1B/SMAD3/MIR34A/EPPK1/MIR155/SERPINE1/PDGFB	10
GO:0034764	positive regulation of transmembrane transport	17/468	199/17913	1.95984e-05	8.50228e-05	3.50872e-05	AKT1/BAX/ABCB1/TERT/MIR21/MIR210/PDPK1/CA2/DRD1/SNCA/MAPK14/CCL2/NFE2L2/CALCR/TESC/IFNG/MIR1-1	17
GO:0043455	regulation of secondary metabolic process	5/468	14/17913	1.9627e-05	8.50228e-05	3.50872e-05	SLC7A11/MIR21/SP1/ZEB2/WNT5A	5
GO:0045360	regulation of interleukin-1 biosynthetic process	5/468	14/17913	1.9627e-05	8.50228e-05	3.50872e-05	MIR181A1/MIR204/MIR195/MIR155/MIR488	5
GO:0051547	regulation of keratinocyte migration	5/468	14/17913	1.9627e-05	8.50228e-05	3.50872e-05	PTEN/MMP9/EPPK1/MTOR/HAS2	5
GO:0061042	vascular wound healing	5/468	14/17913	1.9627e-05	8.50228e-05	3.50872e-05	MIR34A/CXCR4/MCAM/MIR155/SERPINE1	5
GO:1903624	regulation of DNA catabolic process	5/468	14/17913	1.9627e-05	8.50228e-05	3.50872e-05	BAX/APAF1/IL6/MIR146A/ATM	5
GO:0035821	modification of morphology or physiology of other organism	15/468	160/17913	2.02103e-05	8.74762e-05	3.60997e-05	TGFB1/SMAD3/ANXA2/MIR222/MIR221/NUCKS1/HMGA2/NTRK3/SP1/CASP8/MIR155/IFNG/EP300/ATG7/TYMS	15
GO:0018205	peptidyl-lysine modification	25/468	376/17913	2.02643e-05	8.76363e-05	3.61658e-05	TWIST1/SNAI2/EZH2/KDM1A/TGFB1/MAPK3/SUZ12/SOX4/WDR5/SUV39H1/CTNNB1/ATG5/SETD2/SIRT1/ARID4A/DNMT1/IWS1/UBE2I/PRKAA1/SNCA/MDM2/HDAC4/KMT2A/SMAD4/EP300	25
GO:0120193	tight junction organization	9/468	59/17913	2.06919e-05	8.94104e-05	3.68979e-05	SNAI1/SNAI2/RUNX1/TJP1/CLDN5/OCLN/MIR155/TNF/FZD5	9
GO:0034284	response to monosaccharide	17/468	200/17913	2.09133e-05	9.02917e-05	3.72616e-05	CASP3/PTEN/SMAD2/CDKN1B/TGFB1/RAF1/SOX4/FOXA2/MIR221/HIF1A/ANGPT2/PTGS2/FOXO3/PRKAA1/PRKCE/MIR146A/ATG7	17
GO:0043200	response to amino acid	12/468	106/17913	2.09339e-05	9.0305e-05	3.72671e-05	CASP3/MMP2/ZEB1/CDKN1B/PCNA/DNMT1/EGFR/COL6A1/COL4A1/MTOR/TNF/CREB1	12
GO:0051151	negative regulation of smooth muscle cell differentiation	6/468	23/17913	2.13022e-05	9.15869e-05	3.77962e-05	MIR21/PDCD4/MIR221/DNMT1/MIR15B/PDGFB	6
GO:0060055	angiogenesis involved in wound healing	6/468	23/17913	2.13022e-05	9.15869e-05	3.77962e-05	MIR34A/PIK3CB/CXCR4/MCAM/MIR155/SERPINE1	6
GO:0097150	neuronal stem cell population maintenance	6/468	23/17913	2.13022e-05	9.15869e-05	3.77962e-05	SOX2/CDH2/FOXO1/FOXO3/NOTCH1/HES1	6
GO:1902254	negative regulation of intrinsic apoptotic signaling pathway by p53 class mediator	6/468	23/17913	2.13022e-05	9.15869e-05	3.77962e-05	BCL2/KDM1A/MIR21/CD44/SIRT1/MDM2	6
GO:0050890	cognition	21/468	286/17913	2.1875e-05	9.39713e-05	3.87801e-05	CASP3/PTEN/SLC7A11/MAPK1/CLN3/KIT/HIF1A/HOXA1/SGK1/PTGS2/EGFR/MEF2C/ACTR2/DRD1/CLDN5/MAPT/MTOR/TNF/CREB1/EP300/ITGB1	21
GO:0032330	regulation of chondrocyte differentiation	8/468	46/17913	2.22991e-05	9.55545e-05	3.94335e-05	SNAI2/RUNX2/GLI2/CTNNB1/SMAD3/HOXA11/ADAMTS12/BMP4	8
GO:0071354	cellular response to interleukin-6	8/468	46/17913	2.22991e-05	9.55545e-05	3.94335e-05	STAT3/MIRLET7A1/ABCC2/MIR149/MIR125B1/IL6/NFKB1/SMAD4	8
GO:1990089	response to nerve growth factor	8/468	46/17913	2.22991e-05	9.55545e-05	3.94335e-05	AKT1/PTEN/E2F1/FOXO3/PDPK1/MAPT/HSPA5/CREB1	8
GO:0048667	cell morphogenesis involved in neuron differentiation	30/468	500/17913	2.23936e-05	9.58e-05	3.95348e-05	BCL2/PTEN/VEGFA/MAPK1/MAPK3/GLI2/BDNF/CDC42/GSK3B/FEZF1/FN1/DHX36/ERBB2/NTRK3/PIK3CB/MEF2C/ZEB2/ACTR2/CXCR4/ROBO1/MAP2K1/PTK2/MAPT/SMAD4/PTCH1/WASL/CREB1/WNT5A/HES1/ITGB1	30
GO:1901615	organic hydroxy compound metabolic process	30/468	500/17913	2.23936e-05	9.58e-05	3.95348e-05	BCL2/PTEN/SNAI1/SNAI2/SLC7A11/FGFR1/MIR33A/KIT/MIR210/TP53/FGF1/HIF1A/SIRT1/FASN/SP1/ZEB2/NFKB1/PRKAA1/ABCA1/DRD1/SNCA/MIR183/MIR182/TNF/IFNG/GDE1/TGFB2/EPAS1/WNT5A/MIR96	30
GO:0043401	steroid hormone mediated signaling pathway	16/468	181/17913	2.24868e-05	9.61191e-05	3.96665e-05	PAGR1/PARP1/RUNX1/ZBTB7A/CTNNB1/CCNE1/YAP1/AR/SIRT1/RB1/HNF4G/SFRP1/BMP4/ESRRA/LATS1/EP300	16
GO:0006869	lipid transport	23/468	332/17913	2.27737e-05	9.72645e-05	4.01392e-05	AKT1/ABCB1/ABCC1/ABCC2/MIR144/MIR33A/MIR130B/MIR17/MIR34A/ANXA2/SIRT1/MIR148A/CAV1/VPS4A/MIR19B1/NFKB1/MIR128-1/ABCA1/CD36/MIR302A/FABP4/PTCH1/MIR27B	23
GO:0010574	regulation of vascular endothelial growth factor production	7/468	34/17913	2.3185e-05	9.86126e-05	4.06955e-05	TGFB1/C5/HIF1A/PTGS2/IL6/MIR146A/MIR132	7
GO:0032691	negative regulation of interleukin-1 beta production	7/468	34/17913	2.3185e-05	9.86126e-05	4.06955e-05	MIR181A1/CARD8/MIR204/MIR195/MIR155/MIR488/MIR132	7
GO:0035909	aorta morphogenesis	7/468	34/17913	2.3185e-05	9.86126e-05	4.06955e-05	MIR205/SOX4/MIR143/MIR145/MIR29B1/TGFB2/HES1	7
GO:0060795	cell fate commitment involved in formation of primary germ layer	7/468	34/17913	2.3185e-05	9.86126e-05	4.06955e-05	NANOG/SOX2/FGFR1/CTNNB1/HOXA11/POU5F1/BMP4	7
GO:1901030	positive regulation of mitochondrial outer membrane permeabilization involved in apoptotic signaling pathway	7/468	34/17913	2.3185e-05	9.86126e-05	4.06955e-05	BAX/BCL2/MAPK8/GSK3B/E2F1/TP53/CASP8	7
GO:0070585	protein localization to mitochondrion	13/468	125/17913	2.39739e-05	0.000101884	4.20457e-05	AKT1/BAX/BCL2/MAPK8/E2F1/TP53/PRKAA1/MAPT/CASP8/RAC2/SH3GLB1/FBXW7/FZD5	13
GO:0001656	metanephros development	11/468	91/17913	2.48035e-05	0.000105323	4.34647e-05	BCL2/MYC/CTNNB1/YAP1/HOXA11/POU3F3/BMP4/SMAD4/PTCH1/PDGFB/HES1	11
GO:0032388	positive regulation of intracellular transport	17/468	203/17913	2.53418e-05	0.00010752	4.43715e-05	CDH1/TGFB1/MAPK1/GSK3B/SMAD3/TP53/ANXA2/ERBB2/PTGS2/PRKAA1/MAPK14/MDM2/RAC2/SH3GLB1/FBXW7/IFNG/FZD5	17
GO:0051480	regulation of cytosolic calcium ion concentration	21/468	289/17913	2.55436e-05	0.000108287	4.46881e-05	BAX/BCL2/MIR199A1/TGFB1/CLN3/SMAD3/ANXA2/ATG5/CACNA1C/CAV1/PDPK1/DRD1/LPAR1/PRKCE/SNCA/HMGB1/CD36/CALCR/LRP6/WNT5A/MIR1-1	21
GO:0070555	response to interleukin-1	16/468	183/17913	2.57585e-05	0.000109108	4.5027e-05	KLF2/ABCC2/MAPK3/MIR204/HIF1A/IL6/NFKB1/ADAMTS12/SFRP1/SNCA/MIR142/CCL2/HDAC4/MIR155/MIR146A/HAS2	16
GO:0022604	regulation of cell morphogenesis	27/468	430/17913	2.62561e-05	0.000110893	4.57633e-05	PTEN/VEGFA/BDNF/CDC42/MIR21/KIT/GSK3B/CD44/FN1/DHX36/SH3D19/NTRK3/EPB41L3/ZEB2/ACTR2/CXCR4/LPAR1/ROBO1/MAP2K1/PTK2/CCL2/MAPT/KDR/C1QBP/HAS2/CRKL/WNT5A	27
GO:0045646	regulation of erythrocyte differentiation	8/468	47/17913	2.62658e-05	0.000110893	4.57633e-05	STAT3/CDK6/MIR222/MIR221/HOXA5/HIF1A/FOXO3/MAPK14	8
GO:0048641	regulation of skeletal muscle tissue development	8/468	47/17913	2.62658e-05	0.000110893	4.57633e-05	TWIST1/BCL2/TGFB1/CTNNB1/MEF2C/PRKAA1/HDAC4/MIR1-1	8
GO:0070849	response to epidermal growth factor	8/468	47/17913	2.62658e-05	0.000110893	4.57633e-05	AKT1/SNAI2/MAPK1/MAPK3/ERBB2/EGFR/PDPK1/NCL	8
GO:0030032	lamellipodium assembly	9/468	61/17913	2.72678e-05	0.000114935	4.74315e-05	CDC42/KIT/MIR196A1/RAC2/MIR214/HDAC4/FSCN1/MTOR/ITGB1	9
GO:0032835	glomerulus development	9/468	61/17913	2.72678e-05	0.000114935	4.74315e-05	BCL2/MIR125A/ANGPT2/MEF2C/BMP4/NOTCH3/PROM1/PDGFB/HES1	9
GO:0042133	neurotransmitter metabolic process	14/468	145/17913	2.73316e-05	0.00011511	4.75036e-05	AKT1/KLF2/MIR199A1/CLN3/MIR181B1/SMAD3/IL10/CAV1/PTGS2/CD36/MTOR/TNF/IFNG/MIR132	14
GO:0045638	negative regulation of myeloid cell differentiation	11/468	92/17913	2.75201e-05	0.000115809	4.77921e-05	MYC/RBM15/CTNNB1/CDK6/HOXA5/MIR125B1/HOXA7/HOXA9/SFRP1/FBXW7/CUL4A	11
GO:0008543	fibroblast growth factor receptor signaling pathway	12/468	109/17913	2.77755e-05	0.000116331	4.80075e-05	RUNX2/MAPK1/MAPK3/FGFR1/MIR424/CTNNB1/FGF1/MIR503/MIR146A/CRKL/WNT5A/MIR1-1	12
GO:0003181	atrioventricular valve morphogenesis	6/468	24/17913	2.77795e-05	0.000116331	4.80075e-05	TWIST1/SOX4/NOTCH1/MDM2/SMAD4/TGFB2	6
GO:0003272	endocardial cushion formation	6/468	24/17913	2.77795e-05	0.000116331	4.80075e-05	SNAI1/SNAI2/NOTCH1/ROBO1/SMAD4/TGFB2	6
GO:0048143	astrocyte activation	6/468	24/17913	2.77795e-05	0.000116331	4.80075e-05	MIR181B1/EGFR/IL6/MIR142/MAPT/TNF	6
GO:0072012	glomerulus vasculature development	6/468	24/17913	2.77795e-05	0.000116331	4.80075e-05	MIR125A/ANGPT2/BMP4/NOTCH3/PDGFB/HES1	6
GO:2001026	regulation of endothelial cell chemotaxis	6/468	24/17913	2.77795e-05	0.000116331	4.80075e-05	VEGFA/FGFR1/MIR424/FGF1/NOTCH1/KDR	6
GO:0007611	learning or memory	19/468	247/17913	2.83314e-05	0.00011827	4.88077e-05	CASP3/PTEN/SLC7A11/MAPK1/CLN3/KIT/HIF1A/SGK1/PTGS2/EGFR/MEF2C/ACTR2/DRD1/CLDN5/MAPT/MTOR/CREB1/EP300/ITGB1	19
GO:0002701	negative regulation of production of molecular mediator of immune response	7/468	35/17913	2.83343e-05	0.00011827	4.88077e-05	SMAD7/TGFB1/BST2/IL33/IL10/TNF/TGFB2	7
GO:0010831	positive regulation of myotube differentiation	7/468	35/17913	2.83343e-05	0.00011827	4.88077e-05	BCL2/MAML1/MIR206/MAPK14/MMP14/MTOR/MIR1-1	7
GO:0036474	cell death in response to hydrogen peroxide	7/468	35/17913	2.83343e-05	0.00011827	4.88077e-05	MIR21/MIR17/MIR34A/IL10/FOXO3/NFE2L2/MIR155	7
GO:0033599	regulation of mammary gland epithelial cell proliferation	5/468	15/17913	2.88096e-05	0.000119769	4.94262e-05	BAX/CCND1/HOXA5/ROBO1/ZNF703	5
GO:0034349	glial cell apoptotic process	5/468	15/17913	2.88096e-05	0.000119769	4.94262e-05	CASP3/CASP9/TP53/RB1/CCL2	5
GO:0042222	interleukin-1 biosynthetic process	5/468	15/17913	2.88096e-05	0.000119769	4.94262e-05	MIR181A1/MIR204/MIR195/MIR155/MIR488	5
GO:0042362	fat-soluble vitamin biosynthetic process	5/468	15/17913	2.88096e-05	0.000119769	4.94262e-05	SNAI1/SNAI2/NFKB1/TNF/IFNG	5
GO:0042762	regulation of sulfur metabolic process	5/468	15/17913	2.88096e-05	0.000119769	4.94262e-05	SLC7A11/MIR21/SP1/SNCA/NFE2L2	5
GO:0032434	regulation of proteasomal ubiquitin-dependent protein catabolic process	12/468	110/17913	3.04518e-05	0.000126346	5.21406e-05	AKT1/SMAD7/GSK3B/IL33/CAV1/NOP53/MAPK9/CCAR2/MDM2/NFE2L2/AURKA/NKD2	12
GO:1903578	regulation of ATP metabolic process	12/468	110/17913	3.04518e-05	0.000126346	5.21406e-05	PARP1/CDK1/STAT3/ZBTB7A/MIR210/CCNB1/NUPR1/TP53/HIF1A/PRKAA1/SNCA/HDAC4	12
GO:0032092	positive regulation of protein binding	11/468	93/17913	3.04898e-05	0.000126346	5.21406e-05	MMP9/TERT/BDNF/GSK3B/ANXA2/CAV1/MEF2C/CTHRC1/BMP4/EP300/WNT5A	11
GO:0035282	segmentation	11/468	93/17913	3.04898e-05	0.000126346	5.21406e-05	SMAD3/FOXF1/TP53/ZEB2/SFRP1/BMP4/SMAD4/EP300/ATM/FZD5/WNT5A	11
GO:0002686	negative regulation of leukocyte migration	8/468	48/17913	3.08066e-05	0.000127352	5.25557e-05	AKT1/C5/MIR24-1/IL33/HOXA7/CCL2/WASL/BCR	8
GO:0002762	negative regulation of myeloid leukocyte differentiation	8/468	48/17913	3.08066e-05	0.000127352	5.25557e-05	MYC/CTNNB1/CDK6/MIR125B1/HOXA7/SFRP1/FBXW7/CUL4A	8
GO:1905268	negative regulation of chromatin organization	8/468	48/17913	3.08066e-05	0.000127352	5.25557e-05	TWIST1/KDM1A/ATG5/SIRT1/DNMT1/SNCA/UBE2B/MIR182	8
GO:0060761	negative regulation of response to cytokine stimulus	10/468	77/17913	3.08361e-05	0.000127372	5.25638e-05	CARD8/MIRLET7A1/MIR21/MIR24-1/MIR152/CAV1/MIR125B1/IL6/ROBO1/MIR138-1	10
GO:0001756	somitogenesis	9/468	62/17913	3.11704e-05	0.000128547	5.30487e-05	SMAD3/FOXF1/TP53/ZEB2/SFRP1/SMAD4/EP300/ATM/WNT5A	9
GO:2001244	positive regulation of intrinsic apoptotic signaling pathway	9/468	62/17913	3.11704e-05	0.000128547	5.30487e-05	BAX/BCL2/NUPR1/TP53/SIRT1/CAV1/SFPQ/MCL1/FBXW7	9
GO:0006631	fatty acid metabolic process	23/468	339/17913	3.16097e-05	0.000130254	5.37533e-05	TWIST1/AKT1/ADIPOR1/MAPK3/MIR204/MIR33A/QKI/SIRT1/CAV1/FASN/GGT1/MORC2/PTGS2/PRKAA1/SNCA/MAPK14/CD36/MIR183/MTOR/MIR182/BDH2/MIR96/MIR132	23
GO:0030518	intracellular steroid hormone receptor signaling pathway	13/468	129/17913	3.35382e-05	0.00013809	5.69872e-05	PAGR1/PARP1/RUNX1/ZBTB7A/CTNNB1/CCNE1/YAP1/AR/SIRT1/RB1/SFRP1/LATS1/EP300	13
GO:0032231	regulation of actin filament bundle assembly	11/468	94/17913	3.37319e-05	0.000138446	5.71339e-05	CDC42/MIR21/MIR20A/SMAD3/MIR149/SDC4/LPAR1/SFRP1/PXN/MTOR/MIR138-1	11
GO:0048640	negative regulation of developmental growth	11/468	94/17913	3.37319e-05	0.000138446	5.71339e-05	PTEN/CDKN1A/CDKN1B/MIR199A1/MIR200B/SFRP1/PTK2/BMP4/PTCH1/WNT5A/MIR1-1	11
GO:0048709	oligodendrocyte differentiation	11/468	94/17913	3.37319e-05	0.000138446	5.71339e-05	PTEN/TGFB1/CTNNB1/ERBB2/CDKN2C/NOTCH1/CXCR4/LPAR1/MTOR/SOX11/HES1	11
GO:0060191	regulation of lipase activity	11/468	94/17913	3.37319e-05	0.000138446	5.71339e-05	BDNF/FGFR1/KIT/NTRK3/EGFR/MIR590/PDPK1/LPAR1/SNCA/ANGPTL4/MIR182	11
GO:0010573	vascular endothelial growth factor production	7/468	36/17913	3.43887e-05	0.000140582	5.80154e-05	TGFB1/C5/HIF1A/PTGS2/IL6/MIR146A/MIR132	7
GO:0010742	macrophage derived foam cell differentiation	7/468	36/17913	3.43887e-05	0.000140582	5.80154e-05	TGFB1/NFKB1/MAPK9/ABCA1/CSF1/CD36/EP300	7
GO:0032885	regulation of polysaccharide biosynthetic process	7/468	36/17913	3.43887e-05	0.000140582	5.80154e-05	AKT1/TGFB1/GSK3B/NFKB1/MTOR/HAS2/PDGFB	7
GO:0071634	regulation of transforming growth factor beta production	7/468	36/17913	3.43887e-05	0.000140582	5.80154e-05	SMAD3/MIR149/HIF1A/PTGS2/SMAD4/CREB1/TGFB2	7
GO:0090077	foam cell differentiation	7/468	36/17913	3.43887e-05	0.000140582	5.80154e-05	TGFB1/NFKB1/MAPK9/ABCA1/CSF1/CD36/EP300	7
GO:0033143	regulation of intracellular steroid hormone receptor signaling pathway	10/468	78/17913	3.45577e-05	0.000141161	5.82543e-05	PAGR1/PARP1/RUNX1/ZBTB7A/YAP1/AR/SIRT1/SFRP1/LATS1/EP300	10
GO:0019748	secondary metabolic process	9/468	63/17913	3.55358e-05	0.000144812	5.97611e-05	BCL2/ABCC2/SLC7A11/MIR21/SP1/ZEB2/NFE2L2/BDH2/WNT5A	9
GO:0043297	apical junction assembly	9/468	63/17913	3.55358e-05	0.000144812	5.97611e-05	SNAI1/SNAI2/RUNX1/TJP1/CLDN5/OCLN/MIR155/TNF/FZD5	9
GO:0045600	positive regulation of fat cell differentiation	9/468	63/17913	3.55358e-05	0.000144812	5.97611e-05	AKT1/SNAI2/MIR21/WIF1/PTGS2/MIR29B1/SFRP1/MAPK14/CREB1	9
GO:0002719	negative regulation of cytokine production involved in immune response	6/468	25/17913	3.57501e-05	0.000145226	5.99319e-05	SMAD7/TGFB1/BST2/IL10/TNF/TGFB2	6
GO:0060740	prostate gland epithelium morphogenesis	6/468	25/17913	3.57501e-05	0.000145226	5.99319e-05	GLI2/HOXB13/AR/SFRP1/BMP4/WNT5A	6
GO:1900120	regulation of receptor binding	6/468	25/17913	3.57501e-05	0.000145226	5.99319e-05	MMP9/BDNF/ANXA2/IL10/MIR148A/MIR27B	6
GO:1904385	cellular response to angiotensin	6/468	25/17913	3.57501e-05	0.000145226	5.99319e-05	MIR143/MIR145/CAV1/NFKB1/CA2/NFE2L2	6
GO:0030595	leukocyte chemotaxis	16/468	188/17913	3.58512e-05	0.000145522	6.0054e-05	MAPK3/C5/KIT/IL10/IL6/CXCR4/CSF1/MAPK14/HMGB1/CCL2/RAC2/SERPINE1/C1QBP/TGFB2/PDGFB/WNT5A	16
GO:0060395	SMAD protein signal transduction	8/468	49/17913	3.59858e-05	0.000145953	6.02321e-05	VIM/PARP1/SMAD2/TGFB1/SMAD3/BMP4/SMAD4/TGFB2	8
GO:0061564	axon development	27/468	438/17913	3.61654e-05	0.000146567	6.04852e-05	BCL2/CASP3/PTEN/VEGFA/MAPK1/MAPK3/GLI2/BDNF/GSK3B/FEZF1/MIR222/MIR221/FN1/ERBB2/NTRK3/PIK3CB/ZEB2/CXCR4/ROBO1/MAP2K1/PTK2/MAPT/SMAD4/PTCH1/CREB1/WNT5A/ITGB1	27
GO:0016571	histone methylation	13/468	130/17913	3.63949e-05	0.000147381	6.08213e-05	EZH2/KDM1A/SUZ12/WDR5/SUV39H1/CTNNB1/SETD2/SIRT1/ARID4A/DNMT1/IWS1/KMT2A/SMAD4	13
GO:0033273	response to vitamin	11/468	95/17913	3.7267e-05	0.000150676	6.21809e-05	CCND1/SNAI2/TGFB1/MIR125B1/NNT/PTGS2/EGFR/STC1/SFRP1/MDM2/TYMS	11
GO:0045069	regulation of viral genome replication	11/468	95/17913	3.7267e-05	0.000150676	6.21809e-05	BCL2/BST2/MIR222/MIR221/MORC2/NUCKS1/HMGA2/ILF3/MIR155/STAU1/TNF	11
GO:0060348	bone development	16/468	189/17913	3.82447e-05	0.000154508	6.37623e-05	TWIST1/RUNX2/TGFB1/KIT/TP53/ANXA2/HOXA11/ANKRD11/MEF2C/STC1/MMP14/BMP4/HAS2/NOTCH2/FBXW7/EP300	16
GO:0097581	lamellipodium organization	10/468	79/17913	3.86567e-05	0.00015605	6.43987e-05	CDC42/KIT/CD44/MIR196A1/RAC2/MIR214/HDAC4/FSCN1/MTOR/ITGB1	10
GO:0010508	positive regulation of autophagy	12/468	113/17913	3.98692e-05	0.000160818	6.63666e-05	MAPK3/GSK3B/FOXO1/HIF1A/SIRT1/PIK3CB/FOXO3/PRKAA1/KDR/SH3GLB1/IFNG/ATG7	12
GO:0009749	response to glucose	16/468	190/17913	4.07784e-05	0.000164357	6.78269e-05	CASP3/PTEN/SMAD2/CDKN1B/TGFB1/RAF1/SOX4/FOXA2/MIR221/HIF1A/ANGPT2/FOXO3/PRKAA1/PRKCE/MIR146A/ATG7	16
GO:0002070	epithelial cell maturation	5/468	16/17913	4.10073e-05	0.00016438	6.78365e-05	CDKN1A/HOXB13/HOXA5/HIF1A/TYMS	5
GO:0010934	macrophage cytokine production	5/468	16/17913	4.10073e-05	0.00016438	6.78365e-05	TGFB1/SIRT1/CD36/TGFB2/WNT5A	5
GO:0010989	negative regulation of low-density lipoprotein particle clearance	5/468	16/17913	4.10073e-05	0.00016438	6.78365e-05	MIR199A1/MIR17/MIR148A/MIR155/MIR27B	5
GO:0014067	negative regulation of phosphatidylinositol 3-kinase signaling	5/468	16/17913	4.10073e-05	0.00016438	6.78365e-05	TWIST1/PTEN/MIR20A/NOP53/MIR206	5
GO:0060253	negative regulation of glial cell proliferation	5/468	16/17913	4.10073e-05	0.00016438	6.78365e-05	TERT/NOTCH1/MIR146A/SOX11/HES1	5
GO:0060572	morphogenesis of an epithelial bud	5/468	16/17913	4.10073e-05	0.00016438	6.78365e-05	GLI2/CTNNB1/AR/BMP4/WNT5A	5
GO:0070242	thymocyte apoptotic process	5/468	16/17913	4.10073e-05	0.00016438	6.78365e-05	BAX/TP53/HIF1A/BMP4/WNT5A	5
GO:0030177	positive regulation of Wnt signaling pathway	15/468	170/17913	4.12172e-05	0.000164965	6.80778e-05	TERT/SOX4/MIR145/SMAD3/MIR222/YAP1/CAV1/EGFR/MIR29B1/ZEB2/NFKB1/SFRP1/CCAR2/UBE2B/WNT5A	15
GO:0097529	myeloid leukocyte migration	15/468	170/17913	4.12172e-05	0.000164965	6.80778e-05	MAPK3/C5/MIR24-1/KIT/IL6/CSF1/MAPK14/MMP14/HMGB1/CCL2/RAC2/SERPINE1/C1QBP/TGFB2/PDGFB	15
GO:0030212	hyaluronan metabolic process	7/468	37/17913	4.14667e-05	0.000165578	6.83307e-05	AKT1/TGFB1/CD44/NFKB1/HMMR/HAS2/PDGFB	7
GO:0042307	positive regulation of protein import into nucleus	7/468	37/17913	4.14667e-05	0.000165578	6.83307e-05	CDH1/TGFB1/MAPK1/SMAD3/PTGS2/MAPK14/IFNG	7
GO:1904358	positive regulation of telomere maintenance via telomere lengthening	7/468	37/17913	4.14667e-05	0.000165578	6.83307e-05	MAPK1/MAPK3/CTNNB1/DHX36/CCT4/HNRNPA2B1/ATM	7
GO:0008347	glial cell migration	8/468	50/17913	4.18726e-05	0.000166811	6.88396e-05	CTNNB1/MIR222/MIR221/CSF1/MMP14/CCL2/TGFB2/CRKL	8
GO:0032873	negative regulation of stress-activated MAPK cascade	8/468	50/17913	4.18726e-05	0.000166811	6.88396e-05	AKT1/MYC/PDCD4/MIR20A/FOXO1/SFRP1/FOXM1/MIR138-1	8
GO:0070303	negative regulation of stress-activated protein kinase signaling cascade	8/468	50/17913	4.18726e-05	0.000166811	6.88396e-05	AKT1/MYC/PDCD4/MIR20A/FOXO1/SFRP1/FOXM1/MIR138-1	8
GO:0050804	modulation of chemical synaptic transmission	25/468	393/17913	4.21239e-05	0.000167683	6.91993e-05	PTEN/CDH1/STAT3/SLC7A11/MAPK1/KIT/GSK3B/EIF4E/PTGS2/EGFR/MEF2C/CA2/DRD1/PRKCE/SNCA/MIR142/RAP1B/CCL2/MAPT/MTOR/STAU1/TNF/CREB1/BCR/ITGB1	25
GO:0090066	regulation of anatomical structure size	27/468	442/17913	4.22922e-05	0.000168222	6.94221e-05	AKT1/PTEN/KDM1A/ACE2/VEGFA/BDNF/MIR21/GSK3B/ATG5/FN1/CAV1/PTGS2/NTRK3/EGFR/ACTR2/DRD1/PRKCE/MAPT/MIR214/CDK4/MTOR/WASL/MIR153-1/LATS1/CREB1/AKT3/WNT5A	27
GO:0032680	regulation of tumor necrosis factor production	14/468	151/17913	4.29514e-05	0.000170713	7.04499e-05	MIR181A1/TWIST1/MIR204/MIR130A/MIR149/IL10/MIR125B1/MIR195/MIR206/CD36/MIR488/FZD5/WNT5A/MIR132	14
GO:0050808	synapse organization	25/468	394/17913	4.39068e-05	0.000174241	7.1906e-05	PTEN/SLC7A11/CDH2/BDNF/CDC42/CTNNB1/IGF1R/IL10/DHX36/ERBB2/NTRK3/MEF2C/ACTR2/DRD1/SNCA/MAPK14/PTK2/MAPT/COL4A1/WASL/STAU1/TNF/CRKL/FZD5/WNT5A	25
GO:0099177	regulation of trans-synaptic signaling	25/468	394/17913	4.39068e-05	0.000174241	7.1906e-05	PTEN/CDH1/STAT3/SLC7A11/MAPK1/KIT/GSK3B/EIF4E/PTGS2/EGFR/MEF2C/CA2/DRD1/PRKCE/SNCA/MIR142/RAP1B/CCL2/MAPT/MTOR/STAU1/TNF/CREB1/BCR/ITGB1	25
GO:0030038	contractile actin filament bundle assembly	11/468	97/17913	4.53037e-05	0.000179285	7.39874e-05	CDC42/MIR21/MIR20A/SMAD3/MIR149/SDC4/LPAR1/SFRP1/PXN/MTOR/MIR138-1	11
GO:0043149	stress fiber assembly	11/468	97/17913	4.53037e-05	0.000179285	7.39874e-05	CDC42/MIR21/MIR20A/SMAD3/MIR149/SDC4/LPAR1/SFRP1/PXN/MTOR/MIR138-1	11
GO:0002053	positive regulation of mesenchymal cell proliferation	6/468	26/17913	4.54559e-05	0.000179285	7.39874e-05	MYC/VEGFA/FGFR1/CTNNB1/FOXF1/WNT5A	6
GO:0003171	atrioventricular valve development	6/468	26/17913	4.54559e-05	0.000179285	7.39874e-05	TWIST1/SOX4/NOTCH1/MDM2/SMAD4/TGFB2	6
GO:0060914	heart formation	6/468	26/17913	4.54559e-05	0.000179285	7.39874e-05	MIR20A/CTNNB1/MEF2C/ROBO1/BMP4/HES1	6
GO:0061037	negative regulation of cartilage development	6/468	26/17913	4.54559e-05	0.000179285	7.39874e-05	SNAI2/GLI2/MIR21/CTNNB1/ADAMTS12/BMP4	6
GO:0061437	renal system vasculature development	6/468	26/17913	4.54559e-05	0.000179285	7.39874e-05	MIR125A/ANGPT2/BMP4/NOTCH3/PDGFB/HES1	6
GO:0061440	kidney vasculature development	6/468	26/17913	4.54559e-05	0.000179285	7.39874e-05	MIR125A/ANGPT2/BMP4/NOTCH3/PDGFB/HES1	6
GO:0014823	response to activity	9/468	65/17913	4.58324e-05	0.000180493	7.44861e-05	PTEN/CDK1/IL10/HIF1A/ANGPT2/CXCR4/PRKAA1/MTOR/CREB1	9
GO:0097194	execution phase of apoptosis	9/468	65/17913	4.58324e-05	0.000180493	7.44861e-05	AKT1/BAX/CASP3/TP53/APAF1/IL6/HMGB1/CASP8/MIR146A	9
GO:0007265	Ras protein signal transduction	22/468	324/17913	4.62474e-05	0.00018185	7.5046e-05	CDKN1A/CDK2/RAF1/CDKN2A/TP53/RB1/DNMT1/CADM4/NOTCH1/TIMP2/ABCA1/CSF1/LPAR1/ROBO1/MAPK14/RAP1B/FOXM1/NOTCH2/TGFB2/BCR/CRKL/ITGB1	22
GO:0019058	viral life cycle	22/468	324/17913	4.62474e-05	0.00018185	7.5046e-05	BCL2/CDK1/ACE2/CDC42/BST2/MIR130A/MIR222/MIR221/ATG5/CAV1/MORC2/NUCKS1/VPS4A/HMGA2/EGFR/ILF3/CXCR4/CCL2/MIR155/STAU1/TNF/ITGB1	22
GO:0007045	cell-substrate adherens junction assembly	10/468	81/17913	4.81121e-05	0.000188894	7.79529e-05	BCL2/PTEN/VEGFA/SMAD3/SDC4/PDPK1/SFRP1/MMP14/PTK2/KDR	10
GO:0048041	focal adhesion assembly	10/468	81/17913	4.81121e-05	0.000188894	7.79529e-05	BCL2/PTEN/VEGFA/SMAD3/SDC4/PDPK1/SFRP1/MMP14/PTK2/KDR	10
GO:0070228	regulation of lymphocyte apoptotic process	8/468	51/17913	4.85415e-05	0.000190435	7.85887e-05	BAX/PTEN/BIRC7/TP53/IL10/HIF1A/BMP4/WNT5A	8
GO:0007565	female pregnancy	16/468	193/17913	4.92906e-05	0.000193227	7.97408e-05	AKT1/BCL2/MMP2/MMP9/ABCC2/TGFB1/MAPK1/MAPK3/MIR21/AR/ANGPT2/MIR15B/PTGS2/STC1/MTOR/C1QBP	16
GO:0035329	hippo signaling	7/468	38/17913	4.96967e-05	0.000194671	8.03368e-05	CASP3/LATS2/YAP1/TJP1/SOX11/AMOT/LATS1	7
GO:0051251	positive regulation of lymphocyte activation	19/468	258/17913	5.13837e-05	0.000201126	8.30008e-05	AKT1/BCL2/CDKN1A/TGFB1/GLI2/CDC42/MIR21/RUNX1/CAV1/RUNX3/MEF2C/IL6/PDPK1/MMP14/HMGB1/CCL2/MIR155/IFNG/HES1	19
GO:0008361	regulation of cell size	14/468	154/17913	5.33521e-05	0.000208672	8.61151e-05	AKT1/PTEN/KDM1A/VEGFA/BDNF/GSK3B/FN1/NTRK3/MAPT/CDK4/MTOR/CREB1/AKT3/WNT5A	14
GO:2000241	regulation of reproductive process	13/468	135/17913	5.40958e-05	0.000211421	8.72492e-05	SNAI1/CDKN1B/CTNNB1/NUPR1/AR/MIR15B/SFRP1/BMP4/UBE2B/HDAC4/AURKA/C1QBP/WNT5A	13
GO:0007632	visual behavior	8/468	52/17913	5.60722e-05	0.000218979	9.03683e-05	SLC7A11/KIT/HIF1A/HOXA1/DRD1/MTOR/CREB1/ITGB1	8
GO:0045727	positive regulation of translation	12/468	117/17913	5.62853e-05	0.000219645	9.06432e-05	VIM/MAPK1/MAPK3/SOX4/DHX36/ERBB2/MIR15B/IL6/CDK4/MTOR/C1QBP/TNF	12
GO:0003184	pulmonary valve morphogenesis	5/468	17/17913	5.68503e-05	0.00022118	9.12766e-05	NOTCH1/ROBO1/BMP4/NOTCH2/TGFB2	5
GO:0003198	epithelial to mesenchymal transition involved in endocardial cushion formation	5/468	17/17913	5.68503e-05	0.00022118	9.12766e-05	SNAI1/SNAI2/NOTCH1/SMAD4/TGFB2	5
GO:0048339	paraxial mesoderm development	5/468	17/17913	5.68503e-05	0.00022118	9.12766e-05	SMAD2/FGFR1/SMAD3/YAP1/WNT5A	5
GO:2001267	regulation of cysteine-type endopeptidase activity involved in apoptotic signaling pathway	5/468	17/17913	5.68503e-05	0.00022118	9.12766e-05	BAX/MMP9/SMAD3/CASP8/FAS	5
GO:0019054	modulation by virus of host process	6/468	27/17913	5.71623e-05	0.000221725	9.15014e-05	MIR222/MIR221/NTRK3/CASP8/MIR155/ATG7	6
GO:0035883	enteroendocrine cell differentiation	6/468	27/17913	5.71623e-05	0.000221725	9.15014e-05	GSK3B/CDK6/PDPK1/BMP4/WNT5A/HES1	6
GO:0060512	prostate gland morphogenesis	6/468	27/17913	5.71623e-05	0.000221725	9.15014e-05	GLI2/HOXB13/AR/SFRP1/BMP4/WNT5A	6
GO:1905208	negative regulation of cardiocyte differentiation	6/468	27/17913	5.71623e-05	0.000221725	9.15014e-05	MIR199A1/MIR222/MIR200B/EGFR/MIR590/SMAD4	6
GO:0042531	positive regulation of tyrosine phosphorylation of STAT protein	9/468	67/17913	5.85411e-05	0.000226731	9.35677e-05	STAT3/KIT/MIR221/MIR19A/MIR19B1/IL6/TNF/IFNG/HES1	9
GO:0050918	positive chemotaxis	9/468	67/17913	5.85411e-05	0.000226731	9.35677e-05	VEGFA/SMAD3/ANGPT2/NTRK3/HMGB1/BMP4/KDR/PDGFB/WNT5A	9
GO:0010939	regulation of necrotic cell death	7/468	39/17913	5.92178e-05	0.000228837	9.44364e-05	MIR107/MIR221/CAV1/CASP8/MIR214/MIR155/MIR485	7
GO:1902229	regulation of intrinsic apoptotic signaling pathway in response to DNA damage	7/468	39/17913	5.92178e-05	0.000228837	9.44364e-05	BCL2/SNAI1/SNAI2/KDM1A/CD44/SIRT1/CCAR2	7
GO:1904591	positive regulation of protein import	7/468	39/17913	5.92178e-05	0.000228837	9.44364e-05	CDH1/TGFB1/MAPK1/SMAD3/PTGS2/MAPK14/IFNG	7
GO:0019318	hexose metabolic process	18/468	239/17913	6.03115e-05	0.000232888	9.61084e-05	AKT1/ADIPOR1/WDR5/MIR210/GSK3B/TFF3/FOXO1/FOXA2/SIK1/MIR107/TP53/SIRT1/PRKAA1/MAPK14/MTOR/TNF/PKM/EP300	18
GO:0007519	skeletal muscle tissue development	14/468	156/17913	6.14517e-05	0.000237113	9.7852e-05	TWIST1/BCL2/TGFB1/CTNNB1/NUPR1/RB1/CAV1/MEF2C/PRKAA1/MAPK14/HDAC4/SOX11/EP300/MIR1-1	14
GO:0050709	negative regulation of protein secretion	13/468	137/17913	6.3038e-05	0.000243052	0.000100303	CARD8/MIR204/MIR24-1/MIR20A/IL33/MIR149/IL10/FN1/MIR29B1/MIR590/SFRP1/MIR155/TNF	13
GO:0032655	regulation of interleukin-12 production	8/468	53/17913	6.45503e-05	0.000248511	0.000102556	IL10/NFKB1/MAPK14/HMGB1/CD36/MIR155/C1QBP/IFNG	8
GO:0050994	regulation of lipid catabolic process	8/468	53/17913	6.45503e-05	0.000248511	0.000102556	TWIST1/AKT1/PRKAA1/PRKCE/CDK4/MTOR/TNF/IDH1	8
GO:0042098	T cell proliferation	15/468	177/17913	6.56101e-05	0.000252215	0.000104084	BAX/CASP3/TGFB1/MIR21/CTNNB1/TP53/IL10/ERBB2/SDC4/IL6/HMGB1/BMP4/RAC2/MIR155/HES1	15
GO:0043112	receptor metabolic process	15/468	177/17913	6.56101e-05	0.000252215	0.000104084	ACE2/VAMP3/MIR199A1/TGFB1/VEGFA/ANXA2/IL10/HOXA5/HIF1A/CAV1/SNCA/CD36/SH3GLB1/TNF/ITGB1	15
GO:0061515	myeloid cell development	9/468	68/17913	6.59338e-05	0.00025327	0.00010452	KLF2/ZBTB7A/KIT/ANXA2/ARID4A/PTBP3/NOTCH2/FBXW7/EP300	9
GO:0061028	establishment of endothelial barrier	7/468	40/17913	7.01799e-05	0.00026938	0.000111168	CTNNB1/TJP1/FASN/CLDN5/CDH5/RAP1B/TNF	7
GO:0000737	DNA catabolic process, endonucleolytic	6/468	28/17913	7.11582e-05	0.000272122	0.0001123	BAX/CASP3/APAF1/IL6/HMGB1/MIR146A	6
GO:0036296	response to increased oxygen levels	6/468	28/17913	7.11582e-05	0.000272122	0.0001123	CDKN1A/FOXO1/CAV1/CDK4/FAS/ATG7	6
GO:0042634	regulation of hair cycle	6/468	28/17913	7.11582e-05	0.000272122	0.0001123	TERT/CTNNB1/SMAD4/TNF/TGFB2/WNT5A	6
GO:0044030	regulation of DNA methylation	6/468	28/17913	7.11582e-05	0.000272122	0.0001123	PARP1/MYC/MIR29B1/MIR29A/KMT2A/MIR29C	6
GO:0044550	secondary metabolite biosynthetic process	6/468	28/17913	7.11582e-05	0.000272122	0.0001123	SLC7A11/MIR21/SP1/ZEB2/BDH2/WNT5A	6
GO:0070542	response to fatty acid	10/468	85/17913	7.30371e-05	0.0002791	0.000115179	AKT1/CCNB1/E2F1/PTGS2/PRKAA1/PRKCE/SFRP1/CD36/CDK4/CREB1	10
GO:0001541	ovarian follicle development	8/468	54/17913	7.40669e-05	0.000282407	0.000116544	BAX/BCL2/VEGFA/KIT/FOXO3/MMP14/SMAD4/ATM	8
GO:0071385	cellular response to glucocorticoid stimulus	8/468	54/17913	7.40669e-05	0.000282407	0.000116544	CASP9/ABCC2/TGFB1/FOXO1/EIF4E/EGFR/FOXO3/STC1	8
GO:1903078	positive regulation of protein localization to plasma membrane	8/468	54/17913	7.40669e-05	0.000282407	0.000116544	AKT1/EGFR/PDPK1/PRKCE/TNF/IFNG/ITGB1/NKD2	8
GO:0007254	JNK cascade	16/468	200/17913	7.54964e-05	0.000287645	0.000118706	AKT1/MAPK8/PDCD4/BIRC7/IGF1R/LTBR/EGFR/ZEB2/MAPK9/MAPK10/SFRP1/HMGB1/TNF/CRKL/FZD5/WNT5A	16
GO:0007221	positive regulation of transcription of Notch receptor target	5/468	18/17913	7.7032e-05	0.000293063	0.000120941	RBM15/MAML1/NOTCH1/NOTCH3/EP300	5
GO:0060546	negative regulation of necroptotic process	5/468	18/17913	7.7032e-05	0.000293063	0.000120941	MIR221/CAV1/MIR214/MIR155/MIR485	5
GO:1904062	regulation of cation transmembrane transport	21/468	312/17913	7.7652e-05	0.000295204	0.000121825	TWIST1/BAX/PTEN/MMP9/TGFB1/MIR21/MIR210/ATG5/CACNA1C/CAV1/MEF2C/PDPK1/DRD1/PRKCE/SNCA/CCL2/CALCR/TESC/IFNG/MIR153-1/MIR1-1	21
GO:0001709	cell fate determination	7/468	41/17913	8.27437e-05	0.000313212	0.000129256	CTNNB1/MEF2C/BMP4/PTCH1/MCL1/NOTCH2/HES1	7
GO:0010677	negative regulation of cellular carbohydrate metabolic process	7/468	41/17913	8.27437e-05	0.000313212	0.000129256	STAT3/GSK3B/FOXA2/SIK1/NUPR1/HDAC4/EP300	7
GO:0032881	regulation of polysaccharide metabolic process	7/468	41/17913	8.27437e-05	0.000313212	0.000129256	AKT1/TGFB1/GSK3B/NFKB1/MTOR/HAS2/PDGFB	7
GO:0090184	positive regulation of kidney development	7/468	41/17913	8.27437e-05	0.000313212	0.000129256	MYC/TGFB1/VEGFA/BMP4/PROM1/HOXB7/PDGFB	7
GO:1903580	positive regulation of ATP metabolic process	7/468	41/17913	8.27437e-05	0.000313212	0.000129256	CDK1/STAT3/MIR210/CCNB1/NUPR1/HIF1A/PRKAA1	7
GO:1903320	regulation of protein modification by small protein conjugation or removal	17/468	223/17913	8.27535e-05	0.000313212	0.000129256	AKT1/PTEN/KDM1A/SMAD7/SOX4/CTNNB1/ATG5/CAV1/NOP53/UBE2I/MAPK9/PRKCE/HDAC4/MTOR/MIR138-1/FBXW7/HSPA5	17
GO:0001885	endothelial cell development	8/468	55/17913	8.47192e-05	0.000320182	0.000132133	CTNNB1/TJP1/FASN/STC1/CLDN5/CDH5/RAP1B/TNF	8
GO:0032615	interleukin-12 production	8/468	55/17913	8.47192e-05	0.000320182	0.000132133	IL10/NFKB1/MAPK14/HMGB1/CD36/MIR155/C1QBP/IFNG	8
GO:0045807	positive regulation of endocytosis	13/468	141/17913	8.48358e-05	0.000320263	0.000132166	VEGFA/MIR17/MIR20A/ANXA2/ANKFY1/SNCA/CCL2/CD36/SERPINE1/WASL/TNF/BCR/WNT5A	13
GO:0010986	positive regulation of lipoprotein particle clearance	4/468	10/17913	8.52377e-05	0.000320263	0.000132166	MIR144/MIR33A/ANXA2/MIR302A	4
GO:0032025	response to cobalt ion	4/468	10/17913	8.52377e-05	0.000320263	0.000132166	CASP3/CASP9/ATF1/CASP8	4
GO:0032070	regulation of deoxyribonuclease activity	4/468	10/17913	8.52377e-05	0.000320263	0.000132166	AKT1/PCNA/SIRT1/HMGB1	4
GO:0060352	cell adhesion molecule production	4/468	10/17913	8.52377e-05	0.000320263	0.000132166	MIR222/MIR221/CAV1/MIR155	4
GO:0060513	prostatic bud formation	4/468	10/17913	8.52377e-05	0.000320263	0.000132166	GLI2/AR/BMP4/WNT5A	4
GO:0071481	cellular response to X-ray	4/468	10/17913	8.52377e-05	0.000320263	0.000132166	NUCKS1/HMGA2/SFRP1/ATM	4
GO:1901033	positive regulation of response to reactive oxygen species	4/468	10/17913	8.52377e-05	0.000320263	0.000132166	MIR17/MIR34A/FOXO3/TNF	4
GO:0006839	mitochondrial transport	17/468	224/17913	8.74391e-05	0.000327815	0.000135283	BAX/BCL2/STAT3/MAPK8/MIR17/GSK3B/E2F1/TP53/MIR29B1/PRKAA1/CASP8/RAC2/MIR29A/MIR29C/SH3GLB1/FBXW7/FZD5	17
GO:0000083	regulation of transcription involved in G1/S transition of mitotic cell cycle	6/468	29/17913	8.77565e-05	0.000327815	0.000135283	PCNA/CCNE1/E2F1/RB1/CDT1/TYMS	6
GO:0001844	protein insertion into mitochondrial membrane involved in apoptotic signaling pathway	6/468	29/17913	8.77565e-05	0.000327815	0.000135283	BAX/BCL2/MAPK8/E2F1/TP53/CASP8	6
GO:0003401	axis elongation	6/468	29/17913	8.77565e-05	0.000327815	0.000135283	TGFB1/FGF1/YAP1/SFRP1/BMP4/WNT5A	6
GO:0010575	positive regulation of vascular endothelial growth factor production	6/468	29/17913	8.77565e-05	0.000327815	0.000135283	TGFB1/C5/HIF1A/PTGS2/IL6/MIR132	6
GO:0043457	regulation of cellular respiration	6/468	29/17913	8.77565e-05	0.000327815	0.000135283	CDK1/MIR210/CCNB1/HIF1A/NOP53/SNCA	6
GO:0060441	epithelial tube branching involved in lung morphogenesis	6/468	29/17913	8.77565e-05	0.000327815	0.000135283	CTNNB1/FOXF1/YAP1/HOXA5/BMP4/TNF	6
GO:0071549	cellular response to dexamethasone stimulus	6/468	29/17913	8.77565e-05	0.000327815	0.000135283	CASP9/ABCC2/TGFB1/FOXO1/EIF4E/EGFR	6
GO:0060021	roof of mouth development	10/468	87/17913	8.91442e-05	0.000332276	0.000137124	TWIST1/SMAD2/SNAI1/SNAI2/MEF2C/CLDN5/SMAD4/SOX11/TGFB2/WNT5A	10
GO:1903035	negative regulation of response to wounding	10/468	87/17913	8.91442e-05	0.000332276	0.000137124	PTEN/KRT1/CDKN1A/CDKN1B/SMAD3/MIR34A/EPPK1/MIR155/SERPINE1/PDGFB	10
GO:2000117	negative regulation of cysteine-type endopeptidase activity	10/468	87/17913	8.91442e-05	0.000332276	0.000137124	AKT1/MMP9/CARD8/VEGFA/RAF1/MIR17/CD44/PTGS2/SNCA/MDM2	10
GO:0043901	negative regulation of multi-organism process	15/468	182/17913	9.00281e-05	0.000335329	0.000138384	CARD8/BST2/MIR181B1/ANXA2/MIR222/IL10/MIR221/MIR15B/MORC2/HMGA2/ILF3/CD36/MIR155/C1QBP/TNF	15
GO:0002792	negative regulation of peptide secretion	13/468	142/17913	9.12092e-05	0.000339482	0.000140098	CARD8/MIR204/MIR24-1/MIR20A/IL33/MIR149/IL10/FN1/MIR29B1/MIR590/SFRP1/MIR155/TNF	13
GO:0001960	negative regulation of cytokine-mediated signaling pathway	9/468	71/17913	9.29881e-05	0.000345854	0.000142727	CARD8/MIRLET7A1/MIR21/MIR24-1/MIR152/CAV1/MIR125B1/IL6/ROBO1	9
GO:0002688	regulation of leukocyte chemotaxis	11/468	105/17913	9.41257e-05	0.000349833	0.000144369	MAPK3/C5/IL6/CSF1/MAPK14/HMGB1/CCL2/RAC2/SERPINE1/C1QBP/WNT5A	11
GO:0050792	regulation of viral process	16/468	204/17913	9.54061e-05	0.000354336	0.000146228	BCL2/BST2/MIR130A/MIR222/MIR221/MORC2/NUCKS1/VPS4A/HMGA2/SP1/ILF3/CXCR4/MIR155/STAU1/TNF/EP300	16
GO:0071398	cellular response to fatty acid	8/468	56/17913	9.66106e-05	0.000358551	0.000147967	AKT1/CCNB1/E2F1/PRKAA1/PRKCE/SFRP1/CDK4/CREB1	8
GO:0001953	negative regulation of cell-matrix adhesion	7/468	42/17913	9.70817e-05	0.000359782	0.000148475	PTEN/CDKN2A/MIR939/HOXA7/MMP14/MIR29C/SERPINE1	7
GO:0021983	pituitary gland development	7/468	42/17913	9.70817e-05	0.000359782	0.000148475	SOX2/CDH1/GLI2/BMP4/CREB1/WNT5A/HES1	7
GO:0106106	cold-induced thermogenesis	13/468	143/17913	9.79926e-05	0.000362636	0.000149653	KDM1A/ADIPOR1/VEGFA/IGF1R/RB1/CAV1/ADAMTS5/NOTCH1/CXCR4/CD36/FABP4/TSHR/EPAS1	13
GO:0120161	regulation of cold-induced thermogenesis	13/468	143/17913	9.79926e-05	0.000362636	0.000149653	KDM1A/ADIPOR1/VEGFA/IGF1R/RB1/CAV1/ADAMTS5/NOTCH1/CXCR4/CD36/FABP4/TSHR/EPAS1	13
GO:0007095	mitotic G2 DNA damage checkpoint	5/468	19/17913	0.000102309	0.000376446	0.000155352	CDK1/MIR21/NOP53/HMGA2/ATM	5
GO:0031281	positive regulation of cyclase activity	5/468	19/17913	0.000102309	0.000376446	0.000155352	MAPK3/MAPK8/CACNA1C/TIMP2/MAPK14	5
GO:0032331	negative regulation of chondrocyte differentiation	5/468	19/17913	0.000102309	0.000376446	0.000155352	SNAI2/GLI2/CTNNB1/ADAMTS12/BMP4	5
GO:0051546	keratinocyte migration	5/468	19/17913	0.000102309	0.000376446	0.000155352	PTEN/MMP9/EPPK1/MTOR/HAS2	5
GO:0060039	pericardium development	5/468	19/17913	0.000102309	0.000376446	0.000155352	SMAD2/SMAD3/SETD2/NOTCH1/WNT5A	5
GO:0060149	negative regulation of posttranscriptional gene silencing	5/468	19/17913	0.000102309	0.000376446	0.000155352	TGFB1/TERT/TP53/POU5F1/NEAT1	5
GO:0060967	negative regulation of gene silencing by RNA	5/468	19/17913	0.000102309	0.000376446	0.000155352	TGFB1/TERT/TP53/POU5F1/NEAT1	5
GO:0060973	cell migration involved in heart development	5/468	19/17913	0.000102309	0.000376446	0.000155352	TWIST1/SNAI2/NOTCH1/BMP4/MIR1-1	5
GO:0002532	production of molecular mediator involved in inflammatory response	9/468	72/17913	0.000103853	0.000381584	0.000157472	MIR21/PDCD4/MIR17/MIR222/MIR221/MAPK14/CD36/MIR155/SERPINE1	9
GO:2000779	regulation of double-strand break repair	9/468	72/17913	0.000103853	0.000381584	0.000157472	TWIST1/PARP1/KDM1A/MIR221/SETD2/HMGA2/ACTR2/FUS/FOXM1	9
GO:0002697	regulation of immune effector process	26/468	441/17913	0.000104468	0.000383569	0.000158291	SMAD7/TGFB1/MAPK3/BST2/C5/MIR21/FOXF1/IL33/IL10/ATG5/DHX36/NOP53/IL6/PDPK1/MAPK14/HMGB1/CD36/RAC2/MIR155/C1QBP/TNF/IFNG/TGFB2/BCR/FZD5/WNT5A	26
GO:0018394	peptidyl-lysine acetylation	14/468	164/17913	0.000105556	0.000387014	0.000159713	TWIST1/SNAI2/TGFB1/MAPK3/SOX4/WDR5/ATG5/SIRT1/IWS1/PRKAA1/SNCA/KMT2A/SMAD4/EP300	14
GO:0045619	regulation of lymphocyte differentiation	14/468	164/17913	0.000105556	0.000387014	0.000159713	ZEB1/SMAD7/TGFB1/GLI2/MIR21/RUNX1/ERBB2/RUNX3/SFRP1/MMP14/HMGB1/BMP4/MIR155/IFNG	14
GO:0006875	cellular metal ion homeostasis	27/468	467/17913	0.000106838	0.000391436	0.000161538	BAX/BCL2/MYC/MIR199A1/TGFB1/CLN3/SMAD3/ABCG2/ANXA2/ATG5/HIF1A/CACNA1C/CAV1/PIK3CB/PDPK1/DRD1/LPAR1/PRKCE/STC1/SNCA/HMGB1/CD36/CALCR/LRP6/SMAD4/WNT5A/MIR1-1	27
GO:2001251	negative regulation of chromosome organization	12/468	125/17913	0.000107214	0.000392273	0.000161883	TWIST1/PARP1/KDM1A/CCNB1/ATG5/SIRT1/DNMT1/SNCA/UBE2B/CDT1/MIR182/ATM	12
GO:0051194	positive regulation of cofactor metabolic process	6/468	30/17913	0.000107295	0.000392273	0.000161883	MIR210/HIF1A/NNT/PRKAA1/SNCA/NFE2L2	6
GO:0060603	mammary gland duct morphogenesis	6/468	30/17913	0.000107295	0.000392273	0.000161883	TGFB1/GLI2/AR/CSF1/PTCH1/WNT5A	6
GO:0007409	axonogenesis	24/468	393/17913	0.000112475	0.000410919	0.000169578	BCL2/PTEN/VEGFA/MAPK1/MAPK3/GLI2/BDNF/GSK3B/FEZF1/FN1/ERBB2/NTRK3/PIK3CB/ZEB2/CXCR4/ROBO1/MAP2K1/PTK2/MAPT/SMAD4/PTCH1/CREB1/WNT5A/ITGB1	24
GO:0060538	skeletal muscle organ development	14/468	165/17913	0.000112647	0.000411256	0.000169717	TWIST1/BCL2/TGFB1/CTNNB1/NUPR1/RB1/CAV1/MEF2C/PRKAA1/MAPK14/HDAC4/SOX11/EP300/MIR1-1	14
GO:0048592	eye morphogenesis	13/468	145/17913	0.000112877	0.000411304	0.000169737	TWIST1/BAX/BCL2/ZEB1/STAT3/VEGFA/CTNNB1/HIF1A/BMP4/PROM1/SOX11/FZD5/WNT5A	13
GO:0050806	positive regulation of synaptic transmission	13/468	145/17913	0.000112877	0.000411304	0.000169737	PTEN/MAPK1/GSK3B/PTGS2/EGFR/CA2/DRD1/PRKCE/SNCA/CCL2/STAU1/TNF/CREB1	13
GO:0010470	regulation of gastrulation	7/468	43/17913	0.000113378	0.000411304	0.000169737	FGFR1/FOXA2/IL10/MIR221/MIR150/MIR200C/MIR1-1	7
GO:0010883	regulation of lipid storage	7/468	43/17913	0.000113378	0.000411304	0.000169737	SIRT1/IL6/NFKB1/ABCA1/CD36/FBXW7/TNF	7
GO:0034198	cellular response to amino acid starvation	7/468	43/17913	0.000113378	0.000411304	0.000169737	CDKN1A/MAPK1/MAPK3/MAPK8/MTOR/SH3GLB1/FAS	7
GO:0035094	response to nicotine	7/468	43/17913	0.000113378	0.000411304	0.000169737	BCL2/CASP3/SLC7A11/MAPK1/NFKB1/TNF/CREB1	7
GO:0043616	keratinocyte proliferation	7/468	43/17913	0.000113378	0.000411304	0.000169737	SNAI2/MIR21/YAP1/EPPK1/PTCH1/HAS2/NOTCH2	7
GO:0055026	negative regulation of cardiac muscle tissue development	7/468	43/17913	0.000113378	0.000411304	0.000169737	PTEN/MIR199A1/MIR222/MIR200B/MIR590/SMAD4/MIR1-1	7
GO:1901028	regulation of mitochondrial outer membrane permeabilization involved in apoptotic signaling pathway	7/468	43/17913	0.000113378	0.000411304	0.000169737	BAX/BCL2/MAPK8/GSK3B/E2F1/TP53/CASP8	7
GO:0060359	response to ammonium ion	12/468	126/17913	0.000115752	0.000419068	0.000172941	CASP3/MAPK1/MAPK3/CXCR4/DRD1/PRKCE/SNCA/MDM2/MTOR/HSPA5/CRKL/ATG7	12
GO:0021536	diencephalon development	9/468	73/17913	0.000115762	0.000419068	0.000172941	BAX/SOX2/CDH1/GLI2/ZEB2/BMP4/CREB1/WNT5A/HES1	9
GO:0043627	response to estrogen	9/468	73/17913	0.000115762	0.000419068	0.000172941	CCND1/ABCC2/MAPK1/CAV1/CA2/SFRP1/MMP14/MDM2/EP300	9
GO:0043524	negative regulation of neuron apoptotic process	13/468	146/17913	0.000121025	0.000437813	0.000180677	BAX/BCL2/NES/TERT/CLN3/HIF1A/MIR15B/MEF2C/PDPK1/SNCA/MIR124-1/CCL2/FAIM2	13
GO:0007405	neuroblast proliferation	8/468	58/17913	0.000124556	0.000449639	0.000185557	KDM1A/TGFB1/VEGFA/FGFR1/CTNNB1/TP53/MIR137/HIF1A	8
GO:0030521	androgen receptor signaling pathway	8/468	58/17913	0.000124556	0.000449639	0.000185557	ZBTB7A/CTNNB1/CCNE1/AR/SIRT1/RB1/SFRP1/EP300	8
GO:0071384	cellular response to corticosteroid stimulus	8/468	58/17913	0.000124556	0.000449639	0.000185557	CASP9/ABCC2/TGFB1/FOXO1/EIF4E/EGFR/FOXO3/STC1	8
GO:0043414	macromolecule methylation	19/468	276/17913	0.000125859	0.000454025	0.000187367	PARP1/MYC/EZH2/KDM1A/RBM15/SUZ12/WDR5/SUV39H1/CTNNB1/SETD2/SIRT1/ARID4A/DNMT1/IWS1/MIR29B1/MIR29A/KMT2A/MIR29C/SMAD4	19
GO:0061136	regulation of proteasomal protein catabolic process	14/468	167/17913	0.000128076	0.000461701	0.000190535	AKT1/SMAD7/GSK3B/NUPR1/IL33/CAV1/NOP53/MAPK9/CCAR2/MDM2/NFE2L2/AURKA/FBXW7/NKD2	14
GO:0043367	CD4-positive, alpha-beta T cell differentiation	9/468	74/17913	0.000128792	0.000463634	0.000191333	STAT3/SMAD7/MIR21/RUNX1/RUNX3/IL6/HMGB1/MTOR/IFNG	9
GO:0070373	negative regulation of ERK1 and ERK2 cascade	9/468	74/17913	0.000128792	0.000463634	0.000191333	PTEN/MIR21/SPRY4/MIR424/TIMP3/MIR221/DUSP6/MIR503/SMAD4	9
GO:1903900	regulation of viral life cycle	13/468	147/17913	0.000129675	0.000465865	0.000192253	BCL2/BST2/MIR130A/MIR222/MIR221/MORC2/NUCKS1/VPS4A/HMGA2/ILF3/MIR155/STAU1/TNF	13
GO:0030262	apoptotic nuclear changes	6/468	31/17913	0.000130135	0.000465865	0.000192253	BAX/CASP3/APAF1/IL6/HMGB1/MIR146A	6
GO:0035767	endothelial cell chemotaxis	6/468	31/17913	0.000130135	0.000465865	0.000192253	VEGFA/FGFR1/MIR424/FGF1/NOTCH1/KDR	6
GO:0044068	modulation by symbiont of host cellular process	6/468	31/17913	0.000130135	0.000465865	0.000192253	MIR222/MIR221/NTRK3/CASP8/MIR155/ATG7	6
GO:0045648	positive regulation of erythrocyte differentiation	6/468	31/17913	0.000130135	0.000465865	0.000192253	STAT3/MIR222/MIR221/HIF1A/FOXO3/MAPK14	6
GO:0051204	protein insertion into mitochondrial membrane	6/468	31/17913	0.000130135	0.000465865	0.000192253	BAX/BCL2/MAPK8/E2F1/TP53/CASP8	6
GO:1904893	negative regulation of STAT cascade	6/468	31/17913	0.000130135	0.000465865	0.000192253	ADIPOR1/MIR149/CAV1/MIR125B1/MIR155/MIR146A	6
GO:2000758	positive regulation of peptidyl-lysine acetylation	6/468	31/17913	0.000130135	0.000465865	0.000192253	SNAI2/TGFB1/MAPK3/SOX4/PRKAA1/SMAD4	6
GO:0007009	plasma membrane organization	10/468	91/17913	0.000130512	0.000466699	0.000192598	AKT1/PTEN/AR/CAV1/EPB41L3/CXCR4/MIR138-1/SH3GLB1/WASL/TGFB2	10
GO:0031392	regulation of prostaglandin biosynthetic process	4/468	11/17913	0.000131183	0.000466699	0.000192598	MIR204/SIRT1/PTGS2/MIR132	4
GO:0033148	positive regulation of intracellular estrogen receptor signaling pathway	4/468	11/17913	0.000131183	0.000466699	0.000192598	PAGR1/PARP1/YAP1/AR	4
GO:0060947	cardiac vascular smooth muscle cell differentiation	4/468	11/17913	0.000131183	0.000466699	0.000192598	VEGFA/MIR145/NOTCH1/MIR1-1	4
GO:0061314	Notch signaling involved in heart development	4/468	11/17913	0.000131183	0.000466699	0.000192598	SNAI1/SNAI2/NOTCH1/NOTCH2	4
GO:0070243	regulation of thymocyte apoptotic process	4/468	11/17913	0.000131183	0.000466699	0.000192598	TP53/HIF1A/BMP4/WNT5A	4
GO:1903977	positive regulation of glial cell migration	4/468	11/17913	0.000131183	0.000466699	0.000192598	MIR222/MIR221/CSF1/CRKL	4
GO:1905902	regulation of mesoderm formation	4/468	11/17913	0.000131183	0.000466699	0.000192598	FGFR1/MIR150/MIR200C/MIR1-1	4
GO:2001269	positive regulation of cysteine-type endopeptidase activity involved in apoptotic signaling pathway	4/468	11/17913	0.000131183	0.000466699	0.000192598	BAX/SMAD3/CASP8/FAS	4
GO:0034383	low-density lipoprotein particle clearance	7/468	44/17913	0.000131828	0.000468026	0.000193145	MIR199A1/MIR17/ANXA2/MIR148A/CD36/MIR155/MIR27B	7
GO:0035850	epithelial cell differentiation involved in kidney development	7/468	44/17913	0.000131828	0.000468026	0.000193145	MMP9/CTNNB1/YAP1/MEF2C/BMP4/PROM1/PDGFB	7
GO:0051205	protein insertion into membrane	7/468	44/17913	0.000131828	0.000468026	0.000193145	BAX/BCL2/MAPK8/E2F1/TP53/EGFR/CASP8	7
GO:0005996	monosaccharide metabolic process	19/468	277/17913	0.000131933	0.000468076	0.000193166	AKT1/ADIPOR1/WDR5/MIR210/GSK3B/TFF3/FOXO1/FOXA2/SIK1/MIR107/TP53/SIRT1/PRKAA1/PRKCE/MAPK14/MTOR/TNF/PKM/EP300	19
GO:0048593	camera-type eye morphogenesis	11/468	109/17913	0.000132039	0.000468131	0.000193189	TWIST1/BAX/ZEB1/VEGFA/CTNNB1/HIF1A/BMP4/PROM1/SOX11/FZD5/WNT5A	11
GO:0003323	type B pancreatic cell development	5/468	20/17913	0.000133497	0.000470388	0.00019412	GSK3B/CDK6/PDPK1/BMP4/WNT5A	5
GO:0010592	positive regulation of lamellipodium assembly	5/468	20/17913	0.000133497	0.000470388	0.00019412	CDC42/RAC2/HDAC4/FSCN1/MTOR	5
GO:0045655	regulation of monocyte differentiation	5/468	20/17913	0.000133497	0.000470388	0.00019412	MYC/CDK6/MIR125B1/HOXA7/CSF1	5
GO:0051797	regulation of hair follicle development	5/468	20/17913	0.000133497	0.000470388	0.00019412	CTNNB1/SMAD4/TNF/TGFB2/WNT5A	5
GO:0060602	branch elongation of an epithelium	5/468	20/17913	0.000133497	0.000470388	0.00019412	TGFB1/FGF1/YAP1/BMP4/WNT5A	5
GO:0071397	cellular response to cholesterol	5/468	20/17913	0.000133497	0.000470388	0.00019412	ABCA1/LRP6/PTCH1/MIR182/MIR96	5
GO:1903204	negative regulation of oxidative stress-induced neuron death	5/468	20/17913	0.000133497	0.000470388	0.00019412	SLC7A11/CTNNB1/IL10/HIF1A/ATG7	5
GO:2000380	regulation of mesoderm development	5/468	20/17913	0.000133497	0.000470388	0.00019412	SMAD2/FGFR1/MIR150/MIR200C/MIR1-1	5
GO:2000738	positive regulation of stem cell differentiation	5/468	20/17913	0.000133497	0.000470388	0.00019412	DHX36/LTBP3/BMP4/SP7/TGFB2	5
GO:1900542	regulation of purine nucleotide metabolic process	12/468	128/17913	0.000134589	0.000473911	0.000195574	PARP1/CDK1/STAT3/ZBTB7A/MIR210/CCNB1/NUPR1/TP53/HIF1A/PRKAA1/SNCA/HDAC4	12
GO:0045071	negative regulation of viral genome replication	8/468	59/17913	0.000140848	0.000495612	0.000204529	BST2/MIR222/MIR221/MORC2/HMGA2/ILF3/MIR155/TNF	8
GO:0035050	embryonic heart tube development	9/468	75/17913	0.000143026	0.00050259	0.000207409	CTNNB1/SMAD3/YAP1/HIF1A/MEF2C/NOTCH1/SUFU/WNT5A/HES1	9
GO:0048678	response to axon injury	9/468	75/17913	0.000143026	0.00050259	0.000207409	BAX/BCL2/PTEN/CDK1/MIR34A/MIR222/MIR221/NTRK3/MAP2K1	9
GO:0042035	regulation of cytokine biosynthetic process	11/468	110/17913	0.000143327	0.000503304	0.000207704	MIR181A1/STAT3/MIR204/IL10/MIR195/IL6/NFKB1/MIR155/MIR488/TNF/WNT5A	11
GO:0006874	cellular calcium ion homeostasis	23/468	375/17913	0.000145994	0.000512319	0.000211424	BAX/BCL2/MIR199A1/TGFB1/CLN3/SMAD3/ANXA2/ATG5/CACNA1C/CAV1/PIK3CB/PDPK1/DRD1/LPAR1/PRKCE/STC1/SNCA/HMGB1/CD36/CALCR/LRP6/WNT5A/MIR1-1	23
GO:0042129	regulation of T cell proliferation	13/468	149/17913	0.000148584	0.000521054	0.000215029	CASP3/TGFB1/MIR21/CTNNB1/IL10/ERBB2/SDC4/IL6/HMGB1/BMP4/RAC2/MIR155/HES1	13
GO:0046394	carboxylic acid biosynthetic process	25/468	426/17913	0.000151862	0.000532189	0.000219624	STAT3/ADIPOR1/TGFB1/MIR204/MIR33A/ZBTB7A/MIR210/NUPR1/TP53/QKI/HIF1A/SIRT1/FASN/GGT1/PTGS2/NFKB1/PRKAA1/MIR183/HDAC4/HAS2/MIR182/PKM/PDGFB/MIR96/MIR132	25
GO:0002067	glandular epithelial cell differentiation	7/468	45/17913	0.00015264	0.00053419	0.00022045	GSK3B/CDK6/HOXA5/PDPK1/BMP4/WNT5A/HES1	7
GO:0071675	regulation of mononuclear cell migration	7/468	45/17913	0.00015264	0.00053419	0.00022045	TGFB1/MAPK3/CSF1/MAPK14/HMGB1/SERPINE1/TNF	7
GO:0043161	proteasome-mediated ubiquitin-dependent protein catabolic process	21/468	328/17913	0.000156467	0.000546415	0.000225495	AKT1/CDK1/CDK2/SMAD7/CTNNB1/GSK3B/CCNB1/IL33/SIRT1/CAV1/NOP53/MAPK9/CCAR2/MDM2/UBE2B/NFE2L2/AURKA/FBXW7/HSPA5/CUL4A/NKD2	21
GO:0046685	response to arsenic-containing substance	6/468	32/17913	0.000156664	0.000546415	0.000225495	PTEN/CDKN1A/ABCC2/DHX36/MKNK2/RBM4	6
GO:0060674	placenta blood vessel development	6/468	32/17913	0.000156664	0.000546415	0.000225495	AKT1/RBM15/MAPK1/MAP2K1/FZD5/HES1	6
GO:1901099	negative regulation of signal transduction in absence of ligand	6/468	32/17913	0.000156664	0.000546415	0.000225495	AKT1/BCL2/SNAI2/TERT/MCL1/TNF	6
GO:2001240	negative regulation of extrinsic apoptotic signaling pathway in absence of ligand	6/468	32/17913	0.000156664	0.000546415	0.000225495	AKT1/BCL2/SNAI2/TERT/MCL1/TNF	6
GO:0016053	organic acid biosynthetic process	25/468	427/17913	0.000157469	0.000548852	0.000226501	STAT3/ADIPOR1/TGFB1/MIR204/MIR33A/ZBTB7A/MIR210/NUPR1/TP53/QKI/HIF1A/SIRT1/FASN/GGT1/PTGS2/NFKB1/PRKAA1/MIR183/HDAC4/HAS2/MIR182/PKM/PDGFB/MIR96/MIR132	25
GO:0021954	central nervous system neuron development	9/468	76/17913	0.000158549	0.000551872	0.000227747	PTEN/GLI2/ZEB2/DRD1/ROBO1/PTK2/MAPT/CRKL/WNT5A	9
GO:0060415	muscle tissue morphogenesis	9/468	76/17913	0.000158549	0.000551872	0.000227747	SMAD7/TGFB1/MIR143/MIR145/MIR195/NOTCH1/SMAD4/TGFB2/WNT5A	9
GO:0010676	positive regulation of cellular carbohydrate metabolic process	8/468	60/17913	0.000158857	0.000552334	0.000227937	AKT1/WDR5/MIR210/FOXO1/MIR107/SIRT1/PRKCE/SNCA	8
GO:0030902	hindbrain development	13/468	150/17913	0.000158896	0.000552334	0.000227937	BCL2/EZH2/GLI2/CTNNB1/TP53/HERC1/LPAR1/MAP2K1/FAIM2/HSPA5/CRKL/HES1/ITGB1	13
GO:0001894	tissue homeostasis	16/468	214/17913	0.000166493	0.00057835	0.000238674	BAX/BCL2/KRT1/VEGFA/CTNNB1/YAP1/RB1/ANKRD11/EGFR/IL6/CA2/CSF1/RAC2/PROM1/AKT3/EPAS1	16
GO:0003177	pulmonary valve development	5/468	21/17913	0.000171474	0.000590874	0.000243842	NOTCH1/ROBO1/BMP4/NOTCH2/TGFB2	5
GO:0010310	regulation of hydrogen peroxide metabolic process	5/468	21/17913	0.000171474	0.000590874	0.000243842	STAT3/MMP3/NNT/SNCA/RAC2	5
GO:0035162	embryonic hemopoiesis	5/468	21/17913	0.000171474	0.000590874	0.000243842	VEGFA/KIT/HIF1A/KDR/KMT2A	5
GO:0051043	regulation of membrane protein ectodomain proteolysis	5/468	21/17913	0.000171474	0.000590874	0.000243842	TIMP3/IL10/SH3D19/TNF/IFNG	5
GO:0060260	regulation of transcription initiation from RNA polymerase II promoter	5/468	21/17913	0.000171474	0.000590874	0.000243842	TP53/DHX36/HMGB1/CREB1/MIRLET7I	5
GO:0060479	lung cell differentiation	5/468	21/17913	0.000171474	0.000590874	0.000243842	KLF2/CTNNB1/YAP1/HOXA5/CREB1	5
GO:0060575	intestinal epithelial cell differentiation	5/468	21/17913	0.000171474	0.000590874	0.000243842	CDKN1A/HOXA5/HIF1A/MIR29B1/TYMS	5
GO:0072111	cell proliferation involved in kidney development	5/468	21/17913	0.000171474	0.000590874	0.000243842	MYC/MIR125A/BMP4/PTCH1/PDGFB	5
GO:1901984	negative regulation of protein acetylation	5/468	21/17913	0.000171474	0.000590874	0.000243842	TWIST1/GSK3B/ATG5/SIRT1/SNCA	5
GO:1903055	positive regulation of extracellular matrix organization	5/468	21/17913	0.000171474	0.000590874	0.000243842	TGFB1/SMAD3/RB1/IL6/FSCN1	5
GO:1904886	beta-catenin destruction complex disassembly	5/468	21/17913	0.000171474	0.000590874	0.000243842	CTNNB1/GSK3B/CAV1/LRP6/FZD5	5
GO:2000737	negative regulation of stem cell differentiation	5/468	21/17913	0.000171474	0.000590874	0.000243842	STAT3/YAP1/NOTCH1/NFE2L2/HES1	5
GO:0008306	associative learning	9/468	77/17913	0.000175453	0.000604168	0.000249328	SLC7A11/CLN3/KIT/HIF1A/ACTR2/DRD1/MTOR/CREB1/ITGB1	9
GO:0010769	regulation of cell morphogenesis involved in differentiation	18/468	260/17913	0.00017557	0.000604168	0.000249328	PTEN/VEGFA/BDNF/CDC42/GSK3B/FN1/DHX36/NTRK3/ZEB2/ACTR2/ROBO1/MAP2K1/PTK2/MAPT/C1QBP/HAS2/CRKL/WNT5A	18
GO:0009948	anterior/posterior axis specification	7/468	46/17913	0.000176035	0.000604168	0.000249328	CTNNB1/FOXA2/BMP4/AURKA/SMAD4/FZD5/WNT5A	7
GO:0060711	labyrinthine layer development	7/468	46/17913	0.000176035	0.000604168	0.000249328	AKT1/MAPK1/IL10/MAP2K1/CASP8/FZD5/HES1	7
GO:1900015	regulation of cytokine production involved in inflammatory response	7/468	46/17913	0.000176035	0.000604168	0.000249328	MIR21/PDCD4/MIR17/MIR222/MIR221/MAPK14/MIR155	7
GO:1990928	response to amino acid starvation	7/468	46/17913	0.000176035	0.000604168	0.000249328	CDKN1A/MAPK1/MAPK3/MAPK8/MTOR/SH3GLB1/FAS	7
GO:0016575	histone deacetylation	8/468	61/17913	0.00017872	0.000610942	0.000252124	TGFB1/VEGFA/MAPK8/TP53/SIRT1/SFPQ/HDAC4/MIR182	8
GO:0042733	embryonic digit morphogenesis	8/468	61/17913	0.00017872	0.000610942	0.000252124	TWIST1/BAX/GLI2/CTNNB1/HOXA11/BMP4/SMAD4/WNT5A	8
GO:0051893	regulation of focal adhesion assembly	8/468	61/17913	0.00017872	0.000610942	0.000252124	PTEN/VEGFA/SMAD3/SDC4/SFRP1/MMP14/PTK2/KDR	8
GO:0090109	regulation of cell-substrate junction assembly	8/468	61/17913	0.00017872	0.000610942	0.000252124	PTEN/VEGFA/SMAD3/SDC4/SFRP1/MMP14/PTK2/KDR	8
GO:1904356	regulation of telomere maintenance via telomere lengthening	8/468	61/17913	0.00017872	0.000610942	0.000252124	PARP1/MAPK1/MAPK3/CTNNB1/DHX36/CCT4/HNRNPA2B1/ATM	8
GO:1904377	positive regulation of protein localization to cell periphery	8/468	61/17913	0.00017872	0.000610942	0.000252124	AKT1/EGFR/PDPK1/PRKCE/TNF/IFNG/ITGB1/NKD2	8
GO:0006140	regulation of nucleotide metabolic process	12/468	132/17913	0.000180243	0.000615742	0.000254105	PARP1/CDK1/STAT3/ZBTB7A/MIR210/CCNB1/NUPR1/TP53/HIF1A/PRKAA1/SNCA/HDAC4	12
GO:0001764	neuron migration	13/468	152/17913	0.00018138	0.000618805	0.000255369	TWIST1/BAX/STAT3/VEGFA/FGFR1/CTNNB1/FEZF1/NTRK3/MEF2C/CXCR4/DRD1/PTK2/CRKL	13
GO:1990845	adaptive thermogenesis	13/468	152/17913	0.00018138	0.000618805	0.000255369	KDM1A/ADIPOR1/VEGFA/IGF1R/RB1/CAV1/ADAMTS5/NOTCH1/CXCR4/CD36/FABP4/TSHR/EPAS1	13
GO:0006921	cellular component disassembly involved in execution phase of apoptosis	6/468	33/17913	0.000187293	0.000636031	0.000262478	BAX/CASP3/APAF1/IL6/HMGB1/MIR146A	6
GO:0010039	response to iron ion	6/468	33/17913	0.000187293	0.000636031	0.000262478	BCL2/CCND1/CCNB1/HIF1A/SNCA/MDM2	6
GO:0010837	regulation of keratinocyte proliferation	6/468	33/17913	0.000187293	0.000636031	0.000262478	SNAI2/MIR21/YAP1/EPPK1/HAS2/NOTCH2	6
GO:0035115	embryonic forelimb morphogenesis	6/468	33/17913	0.000187293	0.000636031	0.000262478	TWIST1/RUNX2/CTNNB1/CACNA1C/HOXA11/HOXA9	6
GO:0043032	positive regulation of macrophage activation	6/468	33/17913	0.000187293	0.000636031	0.000262478	IL33/IL10/MIR128-1/MIR142/MIR155/WNT5A	6
GO:0048147	negative regulation of fibroblast proliferation	6/468	33/17913	0.000187293	0.000636031	0.000262478	BAX/MYC/NUPR1/TP53/SFRP1/MIR124-1	6
GO:0055094	response to lipoprotein particle	6/468	33/17913	0.000187293	0.000636031	0.000262478	AKT1/ABCA1/CD36/MIR155/MIR302A/ITGB1	6
GO:0003207	cardiac chamber formation	4/468	12/17913	0.00019272	0.000651456	0.000268843	SOX4/MEF2C/NOTCH1/SOX11	4
GO:0050722	regulation of interleukin-1 beta biosynthetic process	4/468	12/17913	0.00019272	0.000651456	0.000268843	MIR204/MIR195/MIR155/MIR488	4
GO:0060391	positive regulation of SMAD protein signal transduction	4/468	12/17913	0.00019272	0.000651456	0.000268843	PARP1/TGFB1/BMP4/SMAD4	4
GO:1902510	regulation of apoptotic DNA fragmentation	4/468	12/17913	0.00019272	0.000651456	0.000268843	BAX/APAF1/IL6/MIR146A	4
GO:1905461	positive regulation of vascular associated smooth muscle cell apoptotic process	4/468	12/17913	0.00019272	0.000651456	0.000268843	MIR24-1/PDCD4/MIR140/MIR1-1	4
GO:2000121	regulation of removal of superoxide radicals	4/468	12/17913	0.00019272	0.000651456	0.000268843	MIR21/CD36/NFE2L2/TNF	4
GO:2000543	positive regulation of gastrulation	4/468	12/17913	0.00019272	0.000651456	0.000268843	FOXA2/MIR150/MIR200C/MIR1-1	4
GO:0051279	regulation of release of sequestered calcium ion into cytosol	9/468	78/17913	0.00019383	0.000654781	0.000270215	BAX/TGFB1/ATG5/CACNA1C/PDPK1/DRD1/PRKCE/SNCA/MIR1-1	9
GO:0045739	positive regulation of DNA repair	8/468	62/17913	0.000200579	0.000677135	0.00027944	PARP1/PCNA/SIRT1/EGFR/ACTR2/HMGB1/FUS/FOXM1	8
GO:0008542	visual learning	7/468	47/17913	0.000202245	0.000681865	0.000281392	SLC7A11/KIT/HIF1A/DRD1/MTOR/CREB1/ITGB1	7
GO:0035722	interleukin-12-mediated signaling pathway	7/468	47/17913	0.000202245	0.000681865	0.000281392	CDC42/PDCD4/ANXA2/IL10/RAP1B/IFNG/HNRNPA2B1	7
GO:0042180	cellular ketone metabolic process	17/468	241/17913	0.000211522	0.000712677	0.000294108	TWIST1/AKT1/ADIPOR1/SLC7A11/MIR204/MIR21/MIR33A/SIRT1/CAV1/PTGS2/PRKCE/SNCA/MIR183/MTOR/MIR182/MIR96/MIR132	17
GO:0043484	regulation of RNA splicing	11/468	115/17913	0.000212873	0.00071676	0.000295793	RBM15/ZBTB7A/CELF3/RBM38/PTBP3/MIR124-1/FUS/C1QBP/RBM4/CELF1/HNRNPA2B1	11
GO:0019932	second-messenger-mediated signaling	22/468	360/17913	0.000213049	0.000716886	0.000295845	VEGFA/GSK3B/CACNA1C/EGFR/CXCR4/PDPK1/PRKAA1/ABCA1/DRD1/LPAR1/MIR124-1/CD36/MAPT/UBE2B/KDR/HDAC4/GPHA2/CALCR/MTOR/TSHR/TNF/MIR1-1	22
GO:0010833	telomere maintenance via telomere lengthening	9/468	79/17913	0.000213781	0.000717475	0.000296088	PARP1/MAPK1/MAPK3/TERT/CTNNB1/DHX36/CCT4/HNRNPA2B1/ATM	9
GO:0032204	regulation of telomere maintenance	9/468	79/17913	0.000213781	0.000717475	0.000296088	PARP1/MYC/MAPK1/MAPK3/CTNNB1/DHX36/CCT4/HNRNPA2B1/ATM	9
GO:0043154	negative regulation of cysteine-type endopeptidase activity involved in apoptotic process	9/468	79/17913	0.000213781	0.000717475	0.000296088	AKT1/MMP9/VEGFA/RAF1/MIR17/CD44/PTGS2/SNCA/MDM2	9
GO:1900034	regulation of cellular response to heat	9/468	79/17913	0.000213781	0.000717475	0.000296088	MAPK1/MAPK3/GSK3B/SIRT1/CCAR2/MAPT/MTOR/EP300/ATM	9
GO:0009110	vitamin biosynthetic process	5/468	22/17913	0.000217173	0.000726021	0.000299615	SNAI1/SNAI2/NFKB1/TNF/IFNG	5
GO:0032366	intracellular sterol transport	5/468	22/17913	0.000217173	0.000726021	0.000299615	MIR17/ANXA2/VPS4A/ABCA1/MIR27B	5
GO:0032367	intracellular cholesterol transport	5/468	22/17913	0.000217173	0.000726021	0.000299615	MIR17/ANXA2/VPS4A/ABCA1/MIR27B	5
GO:0044321	response to leptin	5/468	22/17913	0.000217173	0.000726021	0.000299615	PTEN/CCND1/STAT3/ADIPOR1/SIRT1	5
GO:0051195	negative regulation of cofactor metabolic process	5/468	22/17913	0.000217173	0.000726021	0.000299615	STAT3/NUPR1/TP53/MMP3/HDAC4	5
GO:0060547	negative regulation of necrotic cell death	5/468	22/17913	0.000217173	0.000726021	0.000299615	MIR221/CAV1/MIR214/MIR155/MIR485	5
GO:0032259	methylation	21/468	336/17913	0.000217666	0.000727198	0.000300101	PARP1/MYC/EZH2/KDM1A/RBM15/SUZ12/WDR5/SUV39H1/CTNNB1/SETD2/SIRT1/ARID4A/DNMT1/IWS1/MIR29B1/NNMT/MIR29A/KMT2A/MIR29C/SMAD4/TYMS	21
GO:0034766	negative regulation of ion transmembrane transport	10/468	97/17913	0.000222241	0.000740811	0.000305718	TWIST1/AKT1/PTEN/MMP9/TGFB1/CAV1/PRKCE/MTOR/MIR153-1/MIR1-1	10
GO:0120162	positive regulation of cold-induced thermogenesis	10/468	97/17913	0.000222241	0.000740811	0.000305718	KDM1A/ADIPOR1/VEGFA/IGF1R/CAV1/CXCR4/CD36/FABP4/TSHR/EPAS1	10
GO:0007435	salivary gland morphogenesis	6/468	34/17913	0.000222459	0.000740811	0.000305718	SNAI2/TGFB1/FGFR1/EGFR/TNF/TGFB2	6
GO:0060428	lung epithelium development	6/468	34/17913	0.000222459	0.000740811	0.000305718	KLF2/YAP1/HOXA5/MAP2K1/BMP4/CREB1	6
GO:2001024	negative regulation of response to drug	6/468	34/17913	0.000222459	0.000740811	0.000305718	MIR21/MIR17/IL10/SNCA/NFE2L2/MIR155	6
GO:0090263	positive regulation of canonical Wnt signaling pathway	12/468	135/17913	0.000222622	0.000740874	0.000305744	SOX4/MIR145/SMAD3/MIR222/YAP1/CAV1/EGFR/MIR29B1/NFKB1/SFRP1/CCAR2/UBE2B	12
GO:0072507	divalent inorganic cation homeostasis	24/468	412/17913	0.00022871	0.000760646	0.000313904	BAX/BCL2/MIR199A1/TGFB1/CLN3/SMAD3/ANXA2/ATG5/CACNA1C/CAV1/EGFR/PIK3CB/PDPK1/DRD1/LPAR1/PRKCE/STC1/SNCA/HMGB1/CD36/CALCR/LRP6/WNT5A/MIR1-1	24
GO:0002699	positive regulation of immune effector process	15/468	198/17913	0.000229011	0.000760665	0.000313912	TGFB1/MAPK3/MIR21/FOXF1/IL33/DHX36/IL6/PDPK1/MAPK14/CD36/RAC2/TNF/IFNG/FZD5/WNT5A	15
GO:0050870	positive regulation of T cell activation	15/468	198/17913	0.000229011	0.000760665	0.000313912	AKT1/TGFB1/GLI2/CDC42/MIR21/RUNX1/CAV1/RUNX3/IL6/PDPK1/HMGB1/CCL2/MIR155/IFNG/HES1	15
GO:0051972	regulation of telomerase activity	7/468	48/17913	0.000231515	0.000767991	0.000316935	MYC/MAPK1/MAPK3/CTNNB1/TP53/CCT4/HNRNPA2B1	7
GO:0061647	histone H3-K9 modification	7/468	48/17913	0.000231515	0.000767991	0.000316935	KDM1A/SUV39H1/SIRT1/ARID4A/DNMT1/KMT2A/SMAD4	7
GO:0051017	actin filament bundle assembly	12/468	136/17913	0.000238512	0.000790695	0.000326304	CDC42/MIR21/MIR20A/SMAD3/MIR149/SDC4/LPAR1/SFRP1/PXN/FSCN1/MTOR/MIR138-1	12
GO:0055074	calcium ion homeostasis	23/468	388/17913	0.000239486	0.000793414	0.000327427	BAX/BCL2/MIR199A1/TGFB1/CLN3/SMAD3/ANXA2/ATG5/CACNA1C/CAV1/PIK3CB/PDPK1/DRD1/LPAR1/PRKCE/STC1/SNCA/HMGB1/CD36/CALCR/LRP6/WNT5A/MIR1-1	23
GO:0019915	lipid storage	8/468	64/17913	0.000250896	0.000829616	0.000342366	SIRT1/CAV1/IL6/NFKB1/ABCA1/CD36/FBXW7/TNF	8
GO:0060135	maternal process involved in female pregnancy	8/468	64/17913	0.000250896	0.000829616	0.000342366	AKT1/MAPK1/MAPK3/AR/ANGPT2/PTGS2/STC1/MTOR	8
GO:0071230	cellular response to amino acid stimulus	8/468	64/17913	0.000250896	0.000829616	0.000342366	MMP2/ZEB1/DNMT1/EGFR/COL6A1/COL4A1/MTOR/TNF	8
GO:0061572	actin filament bundle organization	12/468	137/17913	0.000255358	0.000843826	0.000348231	CDC42/MIR21/MIR20A/SMAD3/MIR149/SDC4/LPAR1/SFRP1/PXN/FSCN1/MTOR/MIR138-1	12
GO:0002690	positive regulation of leukocyte chemotaxis	9/468	81/17913	0.000258821	0.000853629	0.000352276	MAPK3/IL6/CSF1/MAPK14/HMGB1/RAC2/SERPINE1/C1QBP/WNT5A	9
GO:0046849	bone remodeling	9/468	81/17913	0.000258821	0.000853629	0.000352276	TGFB1/CTNNB1/EGFR/IL6/CTHRC1/CA2/SFRP1/RAC2/NOTCH2	9
GO:0051702	interaction with symbiont	9/468	81/17913	0.000258821	0.000853629	0.000352276	ANXA2/MIR222/MIR221/FN1/NUCKS1/HMGA2/SP1/MIR155/EP300	9
GO:0003230	cardiac atrium development	6/468	35/17913	0.000262623	0.000863956	0.000356538	SOX4/NOTCH1/MDM2/NOTCH2/TGFB2/WNT5A	6
GO:0010762	regulation of fibroblast migration	6/468	35/17913	0.000262623	0.000863956	0.000356538	AKT1/TGFB1/MIR145/SDC4/PRKCE/MIR124-1	6
GO:0048710	regulation of astrocyte differentiation	6/468	35/17913	0.000262623	0.000863956	0.000356538	MIR181B1/NTRK3/NOTCH1/IL6/MIR142/HES1	6
GO:0071402	cellular response to lipoprotein particle stimulus	6/468	35/17913	0.000262623	0.000863956	0.000356538	AKT1/ABCA1/CD36/MIR155/MIR302A/ITGB1	6
GO:0046632	alpha-beta T cell differentiation	10/468	99/17913	0.000262847	0.000864142	0.000356615	BCL2/STAT3/SMAD7/MIR21/RUNX1/RUNX3/IL6/HMGB1/MTOR/IFNG	10
GO:0002534	cytokine production involved in inflammatory response	7/468	49/17913	0.000264103	0.000864961	0.000356953	MIR21/PDCD4/MIR17/MIR222/MIR221/MAPK14/MIR155	7
GO:0045981	positive regulation of nucleotide metabolic process	7/468	49/17913	0.000264103	0.000864961	0.000356953	CDK1/STAT3/MIR210/CCNB1/NUPR1/HIF1A/PRKAA1	7
GO:0071349	cellular response to interleukin-12	7/468	49/17913	0.000264103	0.000864961	0.000356953	CDC42/PDCD4/ANXA2/IL10/RAP1B/IFNG/HNRNPA2B1	7
GO:0090102	cochlea development	7/468	49/17913	0.000264103	0.000864961	0.000356953	ZEB1/GLI2/HOXA1/NTRK3/CTHRC1/WNT5A/HES1	7
GO:1900544	positive regulation of purine nucleotide metabolic process	7/468	49/17913	0.000264103	0.000864961	0.000356953	CDK1/STAT3/MIR210/CCNB1/NUPR1/HIF1A/PRKAA1	7
GO:2001238	positive regulation of extrinsic apoptotic signaling pathway	7/468	49/17913	0.000264103	0.000864961	0.000356953	PTEN/TIMP3/CAV1/TNFSF10/LTBR/SFRP1/WWOX	7
GO:0044818	mitotic G2/M transition checkpoint	5/468	23/17913	0.000271581	0.000886174	0.000365707	CDK1/MIR21/NOP53/HMGA2/ATM	5
GO:0050926	regulation of positive chemotaxis	5/468	23/17913	0.000271581	0.000886174	0.000365707	VEGFA/SMAD3/ANGPT2/NTRK3/KDR	5
GO:0071404	cellular response to low-density lipoprotein particle stimulus	5/468	23/17913	0.000271581	0.000886174	0.000365707	ABCA1/CD36/MIR155/MIR302A/ITGB1	5
GO:0072215	regulation of metanephros development	5/468	23/17913	0.000271581	0.000886174	0.000365707	MYC/CTNNB1/YAP1/BMP4/PDGFB	5
GO:2000726	negative regulation of cardiac muscle cell differentiation	5/468	23/17913	0.000271581	0.000886174	0.000365707	MIR199A1/MIR222/MIR200B/MIR590/SMAD4	5
GO:0010763	positive regulation of fibroblast migration	4/468	13/17913	0.000272642	0.000886174	0.000365707	AKT1/TGFB1/MIR145/PRKCE	4
GO:0014745	negative regulation of muscle adaptation	4/468	13/17913	0.000272642	0.000886174	0.000365707	SMAD3/FOXO1/MIR214/MTOR	4
GO:0042635	positive regulation of hair cycle	4/468	13/17913	0.000272642	0.000886174	0.000365707	TERT/TNF/TGFB2/WNT5A	4
GO:0050720	interleukin-1 beta biosynthetic process	4/468	13/17913	0.000272642	0.000886174	0.000365707	MIR204/MIR195/MIR155/MIR488	4
GO:0060601	lateral sprouting from an epithelium	4/468	13/17913	0.000272642	0.000886174	0.000365707	GLI2/AR/BMP4/WNT5A	4
GO:0090594	inflammatory response to wounding	4/468	13/17913	0.000272642	0.000886174	0.000365707	TGFB1/MIR21/MIR17/HIF1A	4
GO:2001279	regulation of unsaturated fatty acid biosynthetic process	4/468	13/17913	0.000272642	0.000886174	0.000365707	MIR204/SIRT1/PTGS2/MIR132	4
GO:0072503	cellular divalent inorganic cation homeostasis	23/468	392/17913	0.000277334	0.000900855	0.000371765	BAX/BCL2/MIR199A1/TGFB1/CLN3/SMAD3/ANXA2/ATG5/CACNA1C/CAV1/PIK3CB/PDPK1/DRD1/LPAR1/PRKCE/STC1/SNCA/HMGB1/CD36/CALCR/LRP6/WNT5A/MIR1-1	23
GO:0003143	embryonic heart tube morphogenesis	8/468	65/17913	0.000279677	0.000905613	0.000373729	SMAD3/YAP1/HIF1A/MEF2C/NOTCH1/SUFU/WNT5A/HES1	8
GO:0006801	superoxide metabolic process	8/468	65/17913	0.000279677	0.000905613	0.000373729	TGFB1/MIR21/EGFR/CD36/MAPT/NFE2L2/TNF/MIR27B	8
GO:0032945	negative regulation of mononuclear cell proliferation	8/468	65/17913	0.000279677	0.000905613	0.000373729	CASP3/TGFB1/IL10/ERBB2/SDC4/BMP4/SOX11/ATM	8
GO:0050672	negative regulation of lymphocyte proliferation	8/468	65/17913	0.000279677	0.000905613	0.000373729	CASP3/TGFB1/IL10/ERBB2/SDC4/BMP4/SOX11/ATM	8
GO:0071300	cellular response to retinoic acid	8/468	65/17913	0.000279677	0.000905613	0.000373729	YAP1/NTRK3/ABCA1/TESC/CREB1/ATM/WNT5A/WNT6	8
GO:0072330	monocarboxylic acid biosynthetic process	20/468	318/17913	0.000281649	0.000911425	0.000376128	STAT3/ADIPOR1/MIR204/MIR33A/ZBTB7A/MIR210/NUPR1/TP53/QKI/HIF1A/SIRT1/FASN/PTGS2/PRKAA1/MIR183/HDAC4/MIR182/PKM/MIR96/MIR132	20
GO:0006970	response to osmotic stress	9/468	82/17913	0.00028413	0.000917726	0.000378728	BAX/CASP3/ABCB1/TP53/PTGS2/EGFR/PDPK1/MAPK10/TNF	9
GO:0045445	myoblast differentiation	9/468	82/17913	0.00028413	0.000917726	0.000378728	TGFB1/RB1/MAML1/MEF2C/NOTCH1/MAPK14/BMP4/TNF/EPAS1	9
GO:0048644	muscle organ morphogenesis	9/468	82/17913	0.00028413	0.000917726	0.000378728	SMAD7/TGFB1/MIR143/MIR145/MIR195/NOTCH1/SMAD4/TGFB2/WNT5A	9
GO:0045580	regulation of T cell differentiation	12/468	139/17913	0.000292099	0.000942873	0.000389105	ZEB1/SMAD7/TGFB1/GLI2/MIR21/RUNX1/ERBB2/RUNX3/HMGB1/BMP4/MIR155/IFNG	12
GO:0044706	multi-multicellular organism process	16/468	225/17913	0.000294239	0.000949189	0.000391712	AKT1/BCL2/MMP2/MMP9/ABCC2/TGFB1/MAPK1/MAPK3/MIR21/AR/ANGPT2/MIR15B/PTGS2/STC1/MTOR/C1QBP	16
GO:0002931	response to ischemia	7/468	50/17913	0.00030028	0.00096445	0.00039801	BCL2/CASP9/TP53/CAV1/MIR195/CSF1/FAIM2	7
GO:0045540	regulation of cholesterol biosynthetic process	7/468	50/17913	0.00030028	0.00096445	0.00039801	FGF1/FASN/SP1/PRKAA1/MIR183/MIR182/MIR96	7
GO:0051966	regulation of synaptic transmission, glutamatergic	7/468	50/17913	0.00030028	0.00096445	0.00039801	PTGS2/EGFR/MEF2C/DRD1/MIR142/CCL2/TNF	7
GO:0060976	coronary vasculature development	7/468	50/17913	0.00030028	0.00096445	0.00039801	VEGFA/MIR145/SETD2/NOTCH1/BMP4/SUFU/MIR1-1	7
GO:0070671	response to interleukin-12	7/468	50/17913	0.00030028	0.00096445	0.00039801	CDC42/PDCD4/ANXA2/IL10/RAP1B/IFNG/HNRNPA2B1	7
GO:0106118	regulation of sterol biosynthetic process	7/468	50/17913	0.00030028	0.00096445	0.00039801	FGF1/FASN/SP1/PRKAA1/MIR183/MIR182/MIR96	7
GO:1905517	macrophage migration	7/468	50/17913	0.00030028	0.00096445	0.00039801	MAPK3/C5/MIR24-1/CSF1/MAPK14/MMP14/CCL2	7
GO:0000578	embryonic axis specification	6/468	36/17913	0.000308269	0.000986424	0.000407078	SMAD2/CTNNB1/SMAD4/PTCH1/FZD5/WNT5A	6
GO:0010453	regulation of cell fate commitment	6/468	36/17913	0.000308269	0.000986424	0.000407078	FGFR1/AR/MIR19B1/MIR206/BMP4/MIR1-1	6
GO:0031076	embryonic camera-type eye development	6/468	36/17913	0.000308269	0.000986424	0.000407078	TWIST1/NES/ZEB1/SOX11/FZD5/WNT5A	6
GO:0048009	insulin-like growth factor receptor signaling pathway	6/468	36/17913	0.000308269	0.000986424	0.000407078	AKT1/IGF2R/IGF1R/AR/MIR29C/MIR1-1	6
GO:0051973	positive regulation of telomerase activity	6/468	36/17913	0.000308269	0.000986424	0.000407078	MYC/MAPK1/MAPK3/CTNNB1/CCT4/HNRNPA2B1	6
GO:1905521	regulation of macrophage migration	6/468	36/17913	0.000308269	0.000986424	0.000407078	MAPK3/C5/MIR24-1/CSF1/MAPK14/MMP14	6
GO:0042089	cytokine biosynthetic process	11/468	120/17913	0.00030907	0.000988371	0.000407881	MIR181A1/STAT3/MIR204/IL10/MIR195/IL6/NFKB1/MIR155/MIR488/TNF/WNT5A	11
GO:0010517	regulation of phospholipase activity	8/468	66/17913	0.0003111	0.000993632	0.000410053	BDNF/FGFR1/KIT/NTRK3/EGFR/PDPK1/LPAR1/SNCA	8
GO:2000573	positive regulation of DNA biosynthetic process	8/468	66/17913	0.0003111	0.000993632	0.000410053	MYC/MAPK1/MAPK3/CTNNB1/CCT4/HNRNPA2B1/ATM/PDGFB	8
GO:0032410	negative regulation of transporter activity	9/468	83/17913	0.000311453	0.000994143	0.000410264	TWIST1/PTEN/MMP9/MIR34A/CAV1/PRKCE/SNCA/MIR153-1/MIR1-1	9
GO:0001505	regulation of neurotransmitter levels	20/468	321/17913	0.000318139	0.00101486	0.000418811	AKT1/KLF2/MIR199A1/SLC7A11/CLN3/MIR181B1/GSK3B/SMAD3/IL10/CAV1/PTGS2/MEF2C/DRD1/SNCA/RAP1B/CD36/MTOR/TNF/IFNG/MIR132	20
GO:0003018	vascular process in circulatory system	13/468	161/17913	0.000319571	0.00101816	0.000420176	AKT1/ACE2/TGFB1/MIR21/MIR23A/ATG5/CAV1/MIR23B/PTGS2/EGFR/DRD1/MIR153-1/BCR	13
GO:0006475	internal protein amino acid acetylation	13/468	161/17913	0.000319571	0.00101816	0.000420176	TWIST1/SNAI2/TGFB1/MAPK3/WDR5/ATG5/SIRT1/IWS1/SNCA/MAPT/KMT2A/SMAD4/EP300	13
GO:0042593	glucose homeostasis	16/468	227/17913	0.000324872	0.00103441	0.000426882	AKT1/STAT3/ADIPOR1/RAF1/SOX4/MIR33A/FOXO1/FOXA2/HIF1A/SIRT1/NUCKS1/FOXO3/PRKAA1/PRKCE/PTCH1/MIR146A	16
GO:0042107	cytokine metabolic process	11/468	121/17913	0.000332152	0.00105694	0.000436179	MIR181A1/STAT3/MIR204/IL10/MIR195/IL6/NFKB1/MIR155/MIR488/TNF/WNT5A	11
GO:0051495	positive regulation of cytoskeleton organization	15/468	205/17913	0.000333008	0.00105901	0.000437034	NES/CDKN1B/CDC42/SMAD3/SDC4/NTRK3/ACTR2/LPAR1/PRKCE/SFRP1/PXN/MAPT/MTOR/WASL/MIR1-1	15
GO:0002082	regulation of oxidative phosphorylation	5/468	24/17913	0.000335739	0.00105985	0.00043738	CDK1/MIR210/CCNB1/NUPR1/SNCA	5
GO:0032717	negative regulation of interleukin-8 production	5/468	24/17913	0.000335739	0.00105985	0.00043738	MIR204/IL10/MIR155/MIR488/MIR132	5
GO:0032800	receptor biosynthetic process	5/468	24/17913	0.000335739	0.00105985	0.00043738	ACE2/IL10/HOXA5/HIF1A/TNF	5
GO:0036315	cellular response to sterol	5/468	24/17913	0.000335739	0.00105985	0.00043738	ABCA1/LRP6/PTCH1/MIR182/MIR96	5
GO:0042481	regulation of odontogenesis	5/468	24/17913	0.000335739	0.00105985	0.00043738	RUNX2/TGFB1/CSF1/BMP4/WNT6	5
GO:0044346	fibroblast apoptotic process	5/468	24/17913	0.000335739	0.00105985	0.00043738	MYC/MIR24-1/MIR181B1/TP53/SFRP1	5
GO:0048643	positive regulation of skeletal muscle tissue development	5/468	24/17913	0.000335739	0.00105985	0.00043738	BCL2/CTNNB1/MEF2C/PRKAA1/MIR1-1	5
GO:0062009	secondary palate development	5/468	24/17913	0.000335739	0.00105985	0.00043738	SMAD2/SMAD4/SOX11/TGFB2/WNT5A	5
GO:0090103	cochlea morphogenesis	5/468	24/17913	0.000335739	0.00105985	0.00043738	ZEB1/GLI2/HOXA1/CTHRC1/WNT5A	5
GO:1901032	negative regulation of response to reactive oxygen species	5/468	24/17913	0.000335739	0.00105985	0.00043738	MIR21/MIR17/IL10/NFE2L2/MIR155	5
GO:1903206	negative regulation of hydrogen peroxide-induced cell death	5/468	24/17913	0.000335739	0.00105985	0.00043738	MIR21/MIR17/IL10/NFE2L2/MIR155	5
GO:2001039	negative regulation of cellular response to drug	5/468	24/17913	0.000335739	0.00105985	0.00043738	MIR21/MIR17/IL10/NFE2L2/MIR155	5
GO:0032206	positive regulation of telomere maintenance	7/468	51/17913	0.000340329	0.00107302	0.000442817	MAPK1/MAPK3/CTNNB1/DHX36/CCT4/HNRNPA2B1/ATM	7
GO:0051496	positive regulation of stress fiber assembly	7/468	51/17913	0.000340329	0.00107302	0.000442817	CDC42/SMAD3/SDC4/LPAR1/SFRP1/PXN/MTOR	7
GO:0033500	carbohydrate homeostasis	16/468	228/17913	0.000341194	0.00107444	0.0004434	AKT1/STAT3/ADIPOR1/RAF1/SOX4/MIR33A/FOXO1/FOXA2/HIF1A/SIRT1/NUCKS1/FOXO3/PRKAA1/PRKCE/PTCH1/MIR146A	16
GO:0110053	regulation of actin filament organization	16/468	228/17913	0.000341194	0.00107444	0.0004434	CDC42/MIR21/MIR20A/SMAD3/MIR149/SDC4/ACTR2/LPAR1/PRKCE/SFRP1/PXN/MIR214/MTOR/MIR138-1/WASL/LATS1	16
GO:1903391	regulation of adherens junction organization	8/468	67/17913	0.000345346	0.00108685	0.000448521	PTEN/VEGFA/SMAD3/SDC4/SFRP1/MMP14/PTK2/KDR	8
GO:0042552	myelination	11/468	122/17913	0.000356668	0.00112136	0.000462765	AKT1/PTEN/TGFB1/CTNNB1/QKI/ERBB2/NTRK3/EPB41L3/CXCR4/LPAR1/MTOR	11
GO:0032868	response to insulin	17/468	252/17913	0.000356748	0.00112136	0.000462765	AKT1/PARP1/PTEN/ADIPOR1/FOXO1/MIR107/IGF1R/IL10/SIRT1/TNFSF10/NUCKS1/SP1/PDPK1/PRKAA1/CDK4/MTOR/ESRRA	17
GO:0030574	collagen catabolic process	6/468	37/17913	0.000359909	0.00113061	0.00046658	MMP2/MMP9/MMP1/MMP3/MMP14/ITGB1	6
GO:0032526	response to retinoic acid	10/468	103/17913	0.000362839	0.00113912	0.000470092	IGF2R/YAP1/NTRK3/ABCA1/PTCH1/TESC/CREB1/ATM/WNT5A/WNT6	10
GO:1902905	positive regulation of supramolecular fiber organization	14/468	185/17913	0.0003711	0.00116306	0.000479972	CDKN1B/CDC42/SMAD3/RB1/SDC4/ACTR2/LPAR1/PRKCE/SFRP1/PXN/MAPT/MTOR/WASL/MIR1-1	14
GO:0010972	negative regulation of G2/M transition of mitotic cell cycle	9/468	85/17913	0.000372635	0.00116306	0.000479972	CDK1/MIR21/NOP53/VPS4A/HMGA2/MIR195/MIR19B1/AURKA/ATM	9
GO:0010935	regulation of macrophage cytokine production	4/468	14/17913	0.000373849	0.00116306	0.000479972	TGFB1/CD36/TGFB2/WNT5A	4
GO:0030213	hyaluronan biosynthetic process	4/468	14/17913	0.000373849	0.00116306	0.000479972	TGFB1/NFKB1/HAS2/PDGFB	4
GO:0035067	negative regulation of histone acetylation	4/468	14/17913	0.000373849	0.00116306	0.000479972	TWIST1/ATG5/SIRT1/SNCA	4
GO:0036295	cellular response to increased oxygen levels	4/468	14/17913	0.000373849	0.00116306	0.000479972	FOXO1/CAV1/FAS/ATG7	4
GO:0038166	angiotensin-activated signaling pathway	4/468	14/17913	0.000373849	0.00116306	0.000479972	MIR143/MIR145/CAV1/CA2	4
GO:0045651	positive regulation of macrophage differentiation	4/468	14/17913	0.000373849	0.00116306	0.000479972	TGFB1/RB1/CSF1/CASP8	4
GO:0048368	lateral mesoderm development	4/468	14/17913	0.000373849	0.00116306	0.000479972	SMAD2/FGFR1/FOXF1/YAP1	4
GO:0051123	RNA polymerase II preinitiation complex assembly	4/468	14/17913	0.000373849	0.00116306	0.000479972	TP53/HMGB1/CREB1/MIRLET7I	4
GO:0060261	positive regulation of transcription initiation from RNA polymerase II promoter	4/468	14/17913	0.000373849	0.00116306	0.000479972	TP53/DHX36/CREB1/MIRLET7I	4
GO:0061051	positive regulation of cell growth involved in cardiac muscle cell development	4/468	14/17913	0.000373849	0.00116306	0.000479972	MIR199A1/MIR19A/MIR19B1/MTOR	4
GO:1901722	regulation of cell proliferation involved in kidney development	4/468	14/17913	0.000373849	0.00116306	0.000479972	MYC/MIR125A/BMP4/PDGFB	4
GO:1903729	regulation of plasma membrane organization	4/468	14/17913	0.000373849	0.00116306	0.000479972	AR/SH3GLB1/WASL/TGFB2	4
GO:1904748	regulation of apoptotic process involved in development	4/468	14/17913	0.000373849	0.00116306	0.000479972	BAX/MIR19B1/NOTCH1/TGFB2	4
GO:0050777	negative regulation of immune response	12/468	143/17913	0.000379166	0.00117889	0.000486505	SMAD7/TGFB1/BST2/MIR21/MIR181B1/FOXF1/IL33/IL10/MIR155/TNF/TGFB2/BCR	12
GO:0006937	regulation of muscle contraction	13/468	164/17913	0.000382151	0.00118599	0.000489436	ACE2/SMAD7/MIR21/MIR143/MIR145/KIT/CACNA1C/CAV1/PTGS2/STC1/HDAC4/MIR153-1/MIR1-1	13
GO:0071466	cellular response to xenobiotic stimulus	13/468	164/17913	0.000382151	0.00118599	0.000489436	CASP9/ABCC2/TGFB1/PCNA/FOXO1/E2F1/EIF4E/RB1/GGT1/EGFR/ARNT2/PDGFB/ATG7	13
GO:0042698	ovulation cycle	8/468	68/17913	0.000382601	0.00118599	0.000489436	CASP3/PCNA/SIRT1/EGFR/FOXO3/HAS2/HSPA5/TGFB2	8
GO:0046323	glucose import	8/468	68/17913	0.000382601	0.00118599	0.000489436	AKT1/TERT/MIR143/MIR107/DRD1/MAPK14/NFE2L2/TNF	8
GO:1903524	positive regulation of blood circulation	8/468	68/17913	0.000382601	0.00118599	0.000489436	AKT1/ACE2/MIR21/CAV1/PTGS2/EGFR/TGFB2/MIR1-1	8
GO:0002720	positive regulation of cytokine production involved in immune response	7/468	52/17913	0.000384547	0.00118916	0.000490745	MAPK3/DHX36/IL6/MAPK14/CD36/FZD5/WNT5A	7
GO:0007566	embryo implantation	7/468	52/17913	0.000384547	0.00118916	0.000490745	MMP2/MMP9/MIR21/MIR15B/PTGS2/STC1/C1QBP	7
GO:0051568	histone H3-K4 methylation	7/468	52/17913	0.000384547	0.00118916	0.000490745	KDM1A/WDR5/CTNNB1/ARID4A/DNMT1/KMT2A/SMAD4	7
GO:0097345	mitochondrial outer membrane permeabilization	7/468	52/17913	0.000384547	0.00118916	0.000490745	BAX/BCL2/MAPK8/GSK3B/E2F1/TP53/CASP8	7
GO:0006633	fatty acid biosynthetic process	12/468	144/17913	0.000404071	0.00124879	0.000515353	ADIPOR1/MIR204/MIR33A/QKI/SIRT1/FASN/PTGS2/PRKAA1/MIR183/MIR182/MIR96/MIR132	12
GO:1903321	negative regulation of protein modification by small protein conjugation or removal	9/468	86/17913	0.000406751	0.00125632	0.00051846	AKT1/SMAD7/SOX4/CTNNB1/ATG5/CAV1/PRKCE/MTOR/MIR138-1	9
GO:0007204	positive regulation of cytosolic calcium ion concentration	17/468	255/17913	0.000408908	0.00126108	0.000520422	BAX/BCL2/MIR199A1/TGFB1/ATG5/CACNA1C/CAV1/PDPK1/DRD1/LPAR1/PRKCE/SNCA/HMGB1/CD36/CALCR/LRP6/MIR1-1	17
GO:0001702	gastrulation with mouth forming second	5/468	25/17913	0.000410737	0.00126108	0.000520422	CTNNB1/FOXA2/SMAD4/AMOT/WNT5A	5
GO:0002068	glandular epithelial cell development	5/468	25/17913	0.000410737	0.00126108	0.000520422	GSK3B/CDK6/PDPK1/BMP4/WNT5A	5
GO:0003309	type B pancreatic cell differentiation	5/468	25/17913	0.000410737	0.00126108	0.000520422	GSK3B/CDK6/PDPK1/BMP4/WNT5A	5
GO:0032461	positive regulation of protein oligomerization	5/468	25/17913	0.000410737	0.00126108	0.000520422	BAX/MMP1/TP53/MMP3/SH3GLB1	5
GO:0045672	positive regulation of osteoclast differentiation	5/468	25/17913	0.000410737	0.00126108	0.000520422	CA2/CSF1/TNF/IFNG/CREB1	5
GO:0048596	embryonic camera-type eye morphogenesis	5/468	25/17913	0.000410737	0.00126108	0.000520422	TWIST1/ZEB1/SOX11/FZD5/WNT5A	5
GO:0051894	positive regulation of focal adhesion assembly	5/468	25/17913	0.000410737	0.00126108	0.000520422	VEGFA/SMAD3/SDC4/SFRP1/KDR	5
GO:1900739	regulation of protein insertion into mitochondrial membrane involved in apoptotic signaling pathway	5/468	25/17913	0.000410737	0.00126108	0.000520422	BCL2/MAPK8/E2F1/TP53/CASP8	5
GO:1900740	positive regulation of protein insertion into mitochondrial membrane involved in apoptotic signaling pathway	5/468	25/17913	0.000410737	0.00126108	0.000520422	BCL2/MAPK8/E2F1/TP53/CASP8	5
GO:0007431	salivary gland development	6/468	38/17913	0.000418073	0.00128055	0.000528459	SNAI2/TGFB1/FGFR1/EGFR/TNF/TGFB2	6
GO:0033280	response to vitamin D	6/468	38/17913	0.000418073	0.00128055	0.000528459	SNAI2/TGFB1/MIR125B1/PTGS2/STC1/SFRP1	6
GO:0042149	cellular response to glucose starvation	6/468	38/17913	0.000418073	0.00128055	0.000528459	BCL2/TP53/PRKAA1/NFE2L2/SH3GLB1/HSPA5	6
GO:0042769	DNA damage response, detection of DNA damage	6/468	38/17913	0.000418073	0.00128055	0.000528459	PARP1/SOX4/PCNA/HMGA2/UBE2B/CUL4A	6
GO:0060402	calcium ion transport into cytosol	12/468	145/17913	0.000430344	0.00131735	0.000543646	BAX/BCL2/TGFB1/ATG5/CACNA1C/CAV1/PDPK1/DRD1/PRKCE/SNCA/CALCR/MIR1-1	12
GO:0050853	B cell receptor signaling pathway	7/468	53/17913	0.000433242	0.00132544	0.000546982	BAX/BCL2/MAPK1/RUNX1/MIR34A/MIR19A/MEF2C	7
GO:0032409	regulation of transporter activity	17/468	257/17913	0.000447232	0.00136743	0.00056431	TWIST1/BCL2/PTEN/MMP9/ABCB1/MIR34A/CAV1/SGK1/MEF2C/PRKCE/SNCA/CCL2/KMT2A/TESC/IFNG/MIR153-1/MIR1-1	17
GO:0021761	limbic system development	10/468	106/17913	0.000457087	0.00139508	0.000575721	BAX/CASP3/PTEN/EZH2/FGFR1/GSK3B/CDK6/ZEB2/DRD1/CRKL	10
GO:0043279	response to alkaloid	10/468	106/17913	0.000457087	0.00139508	0.000575721	CASP3/CXCR4/PRKAA1/DRD1/PRKCE/SNCA/MDM2/MTOR/HSPA5/ATG7	10
GO:2000278	regulation of DNA biosynthetic process	10/468	106/17913	0.000457087	0.00139508	0.000575721	MYC/CDKN1A/MAPK1/MAPK3/CTNNB1/TP53/CCT4/HNRNPA2B1/ATM/PDGFB	10
GO:0060193	positive regulation of lipase activity	8/468	70/17913	0.000466927	0.00142427	0.000587767	BDNF/FGFR1/KIT/NTRK3/EGFR/PDPK1/LPAR1/MIR182	8
GO:0007272	ensheathment of neurons	11/468	126/17913	0.000470493	0.00143345	0.000591556	AKT1/PTEN/TGFB1/CTNNB1/QKI/ERBB2/NTRK3/EPB41L3/CXCR4/LPAR1/MTOR	11
GO:0008366	axon ensheathment	11/468	126/17913	0.000470493	0.00143345	0.000591556	AKT1/PTEN/TGFB1/CTNNB1/QKI/ERBB2/NTRK3/EPB41L3/CXCR4/LPAR1/MTOR	11
GO:0010498	proteasomal protein catabolic process	22/468	382/17913	0.000481617	0.00146647	0.000605184	AKT1/CDK1/CDK2/SMAD7/CTNNB1/GSK3B/CCNB1/NUPR1/IL33/SIRT1/CAV1/NOP53/MAPK9/CCAR2/MDM2/UBE2B/NFE2L2/AURKA/FBXW7/HSPA5/CUL4A/NKD2	22
GO:0009791	post-embryonic development	9/468	88/17913	0.000482717	0.00146819	0.000605892	BAX/BCL2/SMAD2/IGF2R/VEGFA/BMP4/MTOR/ATM/FZD5	9
GO:0021575	hindbrain morphogenesis	6/468	39/17913	0.00048332	0.00146819	0.000605892	GLI2/HERC1/MAP2K1/FAIM2/HSPA5/HES1	6
GO:0045746	negative regulation of Notch signaling pathway	6/468	39/17913	0.00048332	0.00146819	0.000605892	AKT1/ZBTB7A/EGFR/MMP14/NOTCH3/FBXW7	6
GO:0090279	regulation of calcium ion import	6/468	39/17913	0.00048332	0.00146819	0.000605892	CTNNB1/MIR34A/STC1/CCL2/CALCR/PDGFB	6
GO:0006694	steroid biosynthetic process	14/468	190/17913	0.000485663	0.00147444	0.000608471	SNAI1/SNAI2/MIR33A/FGF1/SIRT1/FASN/SP1/NFKB1/PRKAA1/MIR183/MIR182/TNF/IFNG/MIR96	14
GO:0002011	morphogenesis of an epithelial sheet	7/468	54/17913	0.000486736	0.00147682	0.000609456	PTEN/CD44/MIR221/NOTCH1/MTOR/SOX11/WNT5A	7
GO:0022037	metencephalon development	10/468	107/17913	0.000492692	0.00149402	0.000616552	BCL2/EZH2/GLI2/TP53/HERC1/LPAR1/MAP2K1/FAIM2/HSPA5/CRKL	10
GO:0002360	T cell lineage commitment	5/468	26/17913	0.000497708	0.00150437	0.000620825	BCL2/STAT3/TP53/IL6/MTOR	5
GO:0045992	negative regulation of embryonic development	5/468	26/17913	0.000497708	0.00150437	0.000620825	SNAI1/CTNNB1/BMP4/SUFU/WNT5A	5
GO:0060969	negative regulation of gene silencing	5/468	26/17913	0.000497708	0.00150437	0.000620825	TGFB1/TERT/TP53/POU5F1/NEAT1	5
GO:0072202	cell differentiation involved in metanephros development	5/468	26/17913	0.000497708	0.00150437	0.000620825	CTNNB1/YAP1/POU3F3/BMP4/PDGFB	5
GO:0001711	endodermal cell fate commitment	4/468	15/17913	0.000499317	0.00150437	0.000620825	NANOG/SOX2/CTNNB1/POU5F1	4
GO:0030812	negative regulation of nucleotide catabolic process	4/468	15/17913	0.000499317	0.00150437	0.000620825	STAT3/NUPR1/TP53/HDAC4	4
GO:0033689	negative regulation of osteoblast proliferation	4/468	15/17913	0.000499317	0.00150437	0.000620825	BCL2/SMAD3/SFRP1/MIR138-1	4
GO:0051198	negative regulation of coenzyme metabolic process	4/468	15/17913	0.000499317	0.00150437	0.000620825	STAT3/NUPR1/TP53/HDAC4	4
GO:0071380	cellular response to prostaglandin E stimulus	4/468	15/17913	0.000499317	0.00150437	0.000620825	AKT1/PRKAA1/PRKCE/SFRP1	4
GO:0072160	nephron tubule epithelial cell differentiation	4/468	15/17913	0.000499317	0.00150437	0.000620825	CTNNB1/YAP1/MEF2C/PROM1	4
GO:1903358	regulation of Golgi organization	4/468	15/17913	0.000499317	0.00150437	0.000620825	MAPK1/MAPK3/MAP2K1/MAP2K2	4
GO:0006479	protein methylation	13/468	169/17913	0.000509585	0.00153352	0.000632852	EZH2/KDM1A/SUZ12/WDR5/SUV39H1/CTNNB1/SETD2/SIRT1/ARID4A/DNMT1/IWS1/KMT2A/SMAD4	13
GO:0008213	protein alkylation	13/468	169/17913	0.000509585	0.00153352	0.000632852	EZH2/KDM1A/SUZ12/WDR5/SUV39H1/CTNNB1/SETD2/SIRT1/ARID4A/DNMT1/IWS1/KMT2A/SMAD4	13
GO:0006305	DNA alkylation	8/468	71/17913	0.000514411	0.00154533	0.000637729	PARP1/MYC/EZH2/DNMT1/MIR29B1/MIR29A/KMT2A/MIR29C	8
GO:0006306	DNA methylation	8/468	71/17913	0.000514411	0.00154533	0.000637729	PARP1/MYC/EZH2/DNMT1/MIR29B1/MIR29A/KMT2A/MIR29C	8
GO:0070664	negative regulation of leukocyte proliferation	8/468	71/17913	0.000514411	0.00154533	0.000637729	CASP3/TGFB1/IL10/ERBB2/SDC4/BMP4/SOX11/ATM	8
GO:0050770	regulation of axonogenesis	12/468	148/17913	0.000517972	0.00155512	0.000641769	PTEN/VEGFA/BDNF/GSK3B/FN1/NTRK3/ZEB2/ROBO1/MAP2K1/PTK2/MAPT/WNT5A	12
GO:0050684	regulation of mRNA processing	10/468	108/17913	0.000530568	0.00159201	0.000656992	RBM15/ZBTB7A/CCNB1/CELF3/DHX36/IWS1/MIR124-1/C1QBP/RBM4/HNRNPA2B1	10
GO:0071897	DNA biosynthetic process	14/468	192/17913	0.000539265	0.00161717	0.000667374	MYC/CDKN1A/MAPK1/MAPK3/TERT/PCNA/CTNNB1/TP53/SIRT1/CCT4/HNRNPA2B1/ATM/PDGFB/TYMS	14
GO:0032722	positive regulation of chemokine production	7/468	55/17913	0.000545363	0.0016345	0.000674528	TWIST1/C5/IL33/HIF1A/IL6/TNF/WNT5A	7
GO:0033146	regulation of intracellular estrogen receptor signaling pathway	6/468	40/17913	0.000556227	0.0016661	0.000687565	PAGR1/PARP1/RUNX1/YAP1/AR/LATS1	6
GO:0007264	small GTPase mediated signal transduction	25/468	465/17913	0.000564429	0.00168968	0.000697298	CDKN1A/CDK2/RAF1/CDC42/CDKN2A/TP53/RB1/DNMT1/CADM4/NOTCH1/TIMP2/ABCA1/CSF1/LPAR1/ROBO1/MAPK14/RAP1B/RAC2/FOXM1/AMOT/NOTCH2/TGFB2/BCR/CRKL/ITGB1	25
GO:0032677	regulation of interleukin-8 production	8/468	72/17913	0.000565731	0.00169063	0.000697692	MIR204/IL10/MIR155/SERPINE1/MIR488/TNF/WNT5A/MIR132	8
GO:0050772	positive regulation of axonogenesis	8/468	72/17913	0.000565731	0.00169063	0.000697692	VEGFA/BDNF/FN1/NTRK3/ZEB2/ROBO1/MAP2K1/MAPT	8
GO:0072347	response to anesthetic	8/468	72/17913	0.000565731	0.00169063	0.000697692	CXCR4/DRD1/PRKCE/SNCA/MDM2/MTOR/HSPA5/ATG7	8
GO:0050821	protein stabilization	13/468	171/17913	0.000569787	0.00169933	0.000701281	PTEN/CDKN1A/SMAD7/SOX4/SMAD3/TP53/NOP53/CCT4/UBE2B/TESC/FBXW7/CREB1/EP300	13
GO:0035710	CD4-positive, alpha-beta T cell activation	9/468	90/17913	0.00056996	0.00169933	0.000701281	STAT3/SMAD7/MIR21/RUNX1/RUNX3/IL6/HMGB1/MTOR/IFNG	9
GO:0051196	regulation of coenzyme metabolic process	9/468	90/17913	0.00056996	0.00169933	0.000701281	STAT3/ZBTB7A/MIR210/NUPR1/TP53/HIF1A/PRKAA1/SNCA/HDAC4	9
GO:0060349	bone morphogenesis	9/468	90/17913	0.00056996	0.00169933	0.000701281	TWIST1/RUNX2/TGFB1/HOXA11/MEF2C/STC1/MMP14/BMP4/HAS2	9
GO:0042303	molting cycle	10/468	109/17913	0.000570823	0.00169994	0.000701531	BCL2/SNAI1/TERT/CTNNB1/PTGS2/EGFR/SMAD4/TNF/TGFB2/WNT5A	10
GO:0042633	hair cycle	10/468	109/17913	0.000570823	0.00169994	0.000701531	BCL2/SNAI1/TERT/CTNNB1/PTGS2/EGFR/SMAD4/TNF/TGFB2/WNT5A	10
GO:0050817	coagulation	20/468	337/17913	0.00059108	0.00175925	0.000726007	KRT1/KDM1A/SLC7A11/MAPK1/MAPK3/RAF1/CDC42/FOXA2/CAV1/PIK3CB/MIR19B1/IL6/PDPK1/PRKCE/CD36/NFE2L2/SERPINE1/C1QBP/PDGFB/PRKAR2A	20
GO:0016051	carbohydrate biosynthetic process	14/468	194/17913	0.000597816	0.0017732	0.000731766	AKT1/TGFB1/WDR5/GSK3B/FOXO1/SIK1/MIR107/SIRT1/NFKB1/SNCA/MTOR/HAS2/EP300/PDGFB	14
GO:0001782	B cell homeostasis	5/468	27/17913	0.000597832	0.0017732	0.000731766	BAX/BCL2/CASP3/HIF1A/MEF2C	5
GO:0045686	negative regulation of glial cell differentiation	5/468	27/17913	0.000597832	0.0017732	0.000731766	MIR181B1/CTNNB1/NTRK3/NOTCH1/HES1	5
GO:0045907	positive regulation of vasoconstriction	5/468	27/17913	0.000597832	0.0017732	0.000731766	AKT1/MIR21/CAV1/PTGS2/EGFR	5
GO:0048679	regulation of axon regeneration	5/468	27/17913	0.000597832	0.0017732	0.000731766	PTEN/MIR222/MIR221/NTRK3/MAP2K1	5
GO:0051569	regulation of histone H3-K4 methylation	5/468	27/17913	0.000597832	0.0017732	0.000731766	KDM1A/CTNNB1/DNMT1/KMT2A/SMAD4	5
GO:0043123	positive regulation of I-kappaB kinase/NF-kappaB signaling	13/468	172/17913	0.000602073	0.00178373	0.00073611	AKT1/BST2/CTNNB1/DHX36/TNFRSF10B/TNFSF10/LTBR/UBE2I/LPAR1/PRKCE/CD36/CASP8/TNF	13
GO:0051783	regulation of nuclear division	13/468	172/17913	0.000602073	0.00178373	0.00073611	CDKN1B/TGFB1/CCNB1/CDKN1C/RB1/BMP4/UBE2B/AURKA/CDT1/CDC25C/ATM/PDGFB/WNT5A	13
GO:0033619	membrane protein proteolysis	7/468	56/17913	0.000609471	0.00180461	0.000744727	TGFB1/TIMP3/IL10/SH3D19/NFKB1/TNF/IFNG	7
GO:0050864	regulation of B cell activation	10/468	110/17913	0.000613572	0.00181571	0.000749308	BCL2/CASP3/CDKN1A/TGFB1/IL10/MEF2C/IL6/SFRP1/MMP14/ATM	10
GO:0016573	histone acetylation	12/468	151/17913	0.000620153	0.00183413	0.00075691	TWIST1/SNAI2/TGFB1/MAPK3/WDR5/ATG5/SIRT1/IWS1/SNCA/KMT2A/SMAD4/EP300	12
GO:0051881	regulation of mitochondrial membrane potential	8/468	73/17913	0.000621112	0.00183591	0.000757646	AKT1/BAX/BCL2/PARP1/MIR181B1/NNT/MAPT/KDR	8
GO:0050807	regulation of synapse organization	15/468	218/17913	0.000635847	0.00187839	0.000775176	PTEN/SLC7A11/CDH2/BDNF/IL10/DHX36/NTRK3/MEF2C/ACTR2/SNCA/MAPK14/PTK2/TNF/CRKL/WNT5A	15
GO:0010907	positive regulation of glucose metabolic process	6/468	41/17913	0.000637395	0.00187866	0.000775286	AKT1/WDR5/MIR210/FOXO1/MIR107/SIRT1	6
GO:0035136	forelimb morphogenesis	6/468	41/17913	0.000637395	0.00187866	0.000775286	TWIST1/RUNX2/CTNNB1/CACNA1C/HOXA11/HOXA9	6
GO:0050873	brown fat cell differentiation	6/468	41/17913	0.000637395	0.00187866	0.000775286	LAMB3/SIRT1/PTGS2/MAPK14/FABP4/MTOR	6
GO:0070317	negative regulation of G0 to G1 transition	6/468	41/17913	0.000637395	0.00187866	0.000775286	EZH2/SUZ12/MIR424/E2F1/APAF1/MIR503	6
GO:0001780	neutrophil homeostasis	4/468	16/17913	0.000652088	0.00190995	0.000788199	SLC7A11/PIK3CB/IL6/HMGB1	4
GO:0002076	osteoblast development	4/468	16/17913	0.000652088	0.00190995	0.000788199	RUNX2/GLI2/SMAD3/HDAC4	4
GO:0043217	myelin maintenance	4/468	16/17913	0.000652088	0.00190995	0.000788199	AKT1/PTEN/EPB41L3/CXCR4	4
GO:0045722	positive regulation of gluconeogenesis	4/468	16/17913	0.000652088	0.00190995	0.000788199	WDR5/FOXO1/MIR107/SIRT1	4
GO:0048070	regulation of developmental pigmentation	4/468	16/17913	0.000652088	0.00190995	0.000788199	BAX/BCL2/KIT/ZEB2	4
GO:0051571	positive regulation of histone H3-K4 methylation	4/468	16/17913	0.000652088	0.00190995	0.000788199	CTNNB1/DNMT1/KMT2A/SMAD4	4
GO:0055012	ventricular cardiac muscle cell differentiation	4/468	16/17913	0.000652088	0.00190995	0.000788199	CDK1/CCNB1/ATG5/MEF2C	4
GO:0060965	negative regulation of gene silencing by miRNA	4/468	16/17913	0.000652088	0.00190995	0.000788199	TGFB1/TP53/POU5F1/NEAT1	4
GO:0090335	regulation of brown fat cell differentiation	4/468	16/17913	0.000652088	0.00190995	0.000788199	SIRT1/PTGS2/MAPK14/MTOR	4
GO:1902166	negative regulation of intrinsic apoptotic signaling pathway in response to DNA damage by p53 class mediator	4/468	16/17913	0.000652088	0.00190995	0.000788199	BCL2/KDM1A/CD44/SIRT1	4
GO:2001170	negative regulation of ATP biosynthetic process	4/468	16/17913	0.000652088	0.00190995	0.000788199	PARP1/STAT3/NUPR1/HDAC4	4
GO:0034767	positive regulation of ion transmembrane transport	12/468	152/17913	0.000657762	0.00192548	0.000794607	BAX/ABCB1/MIR21/MIR210/PDPK1/DRD1/SNCA/CCL2/CALCR/TESC/IFNG/MIR1-1	12
GO:0043270	positive regulation of ion transport	17/468	266/17913	0.000660494	0.00193238	0.000797454	AKT1/BAX/ACE2/ABCB1/MIR21/MIR210/CAV1/PDPK1/DRD1/STC1/SNCA/CCL2/CALCR/TESC/IFNG/PDGFB/MIR1-1	17
GO:0032535	regulation of cellular component size	19/468	315/17913	0.000661657	0.00193468	0.000798405	AKT1/PTEN/KDM1A/VEGFA/BDNF/GSK3B/FN1/NTRK3/ACTR2/PRKCE/MAPT/MIR214/CDK4/MTOR/WASL/LATS1/CREB1/AKT3/WNT5A	19
GO:0010518	positive regulation of phospholipase activity	7/468	57/17913	0.000679418	0.00198549	0.000819372	BDNF/FGFR1/KIT/NTRK3/EGFR/PDPK1/LPAR1	7
GO:0032869	cellular response to insulin stimulus	14/468	197/17913	0.000695716	0.00203196	0.000838552	AKT1/PARP1/PTEN/ADIPOR1/FOXO1/MIR107/IGF1R/SIRT1/NUCKS1/SP1/PDPK1/PRKAA1/CDK4/ESRRA	14
GO:0050878	regulation of body fluid levels	26/468	499/17913	0.000701794	0.00204856	0.000845399	CCND1/KRT1/KDM1A/VEGFA/SLC7A11/MAPK1/MAPK3/RAF1/CDC42/FOXA2/ANXA2/ATG5/HIF1A/CAV1/PIK3CB/IL6/PDPK1/PRKCE/CD36/NFE2L2/SERPINE1/C1QBP/HAS2/CREB1/PDGFB/PRKAR2A	26
GO:0021987	cerebral cortex development	10/468	112/17913	0.000707027	0.00206266	0.000851221	BAX/KDM1A/CDH2/CTNNB1/GSK3B/HIF1A/EGFR/POU3F3/ROBO1/CRKL	10
GO:0000002	mitochondrial genome maintenance	5/468	28/17913	0.000712326	0.00206992	0.000854217	PARP1/TP53/MIR155/AKT3/ATG7	5
GO:0031063	regulation of histone deacetylation	5/468	28/17913	0.000712326	0.00206992	0.000854217	TGFB1/VEGFA/MAPK8/TP53/MIR182	5
GO:0032770	positive regulation of monooxygenase activity	5/468	28/17913	0.000712326	0.00206992	0.000854217	AKT1/TERT/HIF1A/TNF/IFNG	5
GO:0033688	regulation of osteoblast proliferation	5/468	28/17913	0.000712326	0.00206992	0.000854217	BCL2/SMAD3/CTHRC1/SFRP1/MIR138-1	5
GO:0052312	modulation of transcription in other organism involved in symbiotic interaction	5/468	28/17913	0.000712326	0.00206992	0.000854217	NUCKS1/HMGA2/NTRK3/SP1/EP300	5
GO:0085029	extracellular matrix assembly	5/468	28/17913	0.000712326	0.00206992	0.000854217	TGFB1/SMAD3/MIR29B1/NOTCH1/HAS2	5
GO:1902745	positive regulation of lamellipodium organization	5/468	28/17913	0.000712326	0.00206992	0.000854217	CDC42/RAC2/HDAC4/FSCN1/MTOR	5
GO:0002702	positive regulation of production of molecular mediator of immune response	9/468	93/17913	0.000724684	0.00210228	0.000867569	TGFB1/MAPK3/IL33/DHX36/IL6/MAPK14/CD36/FZD5/WNT5A	9
GO:0044070	regulation of anion transport	9/468	93/17913	0.000724684	0.00210228	0.000867569	AKT1/ACE2/ABCB1/FGFR1/MIR33A/CA2/STC1/SNCA/MTOR	9
GO:0048010	vascular endothelial growth factor receptor signaling pathway	9/468	93/17913	0.000724684	0.00210228	0.000867569	VEGFA/CDC42/HIF1A/PIK3CB/CADM4/MAPK14/PTK2/PXN/KDR	9
GO:0010863	positive regulation of phospholipase C activity	6/468	42/17913	0.000727448	0.00210792	0.000869898	BDNF/FGFR1/KIT/NTRK3/EGFR/LPAR1	6
GO:0018023	peptidyl-lysine trimethylation	6/468	42/17913	0.000727448	0.00210792	0.000869898	SUV39H1/SETD2/SIRT1/ARID4A/IWS1/KMT2A	6
GO:0000723	telomere maintenance	12/468	154/17913	0.000738734	0.00213942	0.000882899	PARP1/MYC/MAPK1/MAPK3/TERT/PCNA/CTNNB1/CCNE1/DHX36/CCT4/HNRNPA2B1/ATM	12
GO:0032233	positive regulation of actin filament bundle assembly	7/468	58/17913	0.000755575	0.00218697	0.000902519	CDC42/SMAD3/SDC4/LPAR1/SFRP1/PXN/MTOR	7
GO:0050803	regulation of synapse structure or activity	15/468	222/17913	0.000766822	0.00221828	0.00091544	PTEN/SLC7A11/CDH2/BDNF/IL10/DHX36/NTRK3/MEF2C/ACTR2/SNCA/MAPK14/PTK2/TNF/CRKL/WNT5A	15
GO:0060996	dendritic spine development	9/468	94/17913	0.000783281	0.00226462	0.000934563	PTEN/CDC42/DHX36/MEF2C/ACTR2/LPAR1/MAPK6/MTOR/WASL	9
GO:0070665	positive regulation of leukocyte proliferation	11/468	134/17913	0.000790422	0.00228398	0.000942555	BCL2/CDKN1A/BST2/MIR21/MIR181B1/MEF2C/IL6/CSF1/HMGB1/MIR155/HES1	11
GO:0031397	negative regulation of protein ubiquitination	8/468	76/17913	0.000813991	0.00235077	0.000970117	AKT1/SMAD7/SOX4/ATG5/CAV1/PRKCE/MTOR/MIR138-1	8
GO:0006775	fat-soluble vitamin metabolic process	6/468	43/17913	0.000827027	0.0023842	0.000983915	SNAI1/SNAI2/FGFR1/NFKB1/TNF/IFNG	6
GO:0010761	fibroblast migration	6/468	43/17913	0.000827027	0.0023842	0.000983915	AKT1/TGFB1/MIR145/SDC4/PRKCE/MIR124-1	6
GO:0071364	cellular response to epidermal growth factor stimulus	6/468	43/17913	0.000827027	0.0023842	0.000983915	AKT1/SNAI2/ERBB2/EGFR/PDPK1/NCL	6
GO:0018393	internal peptidyl-lysine acetylation	12/468	156/17913	0.000827881	0.0023842	0.000983915	TWIST1/SNAI2/TGFB1/MAPK3/WDR5/ATG5/SIRT1/IWS1/SNCA/KMT2A/SMAD4/EP300	12
GO:0071347	cellular response to interleukin-1	12/468	156/17913	0.000827881	0.0023842	0.000983915	KLF2/ABCC2/MAPK3/HIF1A/IL6/NFKB1/ADAMTS12/SFRP1/CCL2/MIR155/MIR146A/HAS2	12
GO:0008202	steroid metabolic process	19/468	321/17913	0.000829401	0.00238725	0.000985171	SNAI1/SNAI2/FGFR1/MIR33A/KIT/FGF1/SIRT1/FASN/SP1/NFKB1/PRKAA1/ABCA1/MIR183/WWOX/MIR182/TNF/IFNG/MIR27B/MIR96	19
GO:0010744	positive regulation of macrophage derived foam cell differentiation	4/468	17/17913	0.000835237	0.00238805	0.000985501	NFKB1/MAPK9/CSF1/CD36	4
GO:0032966	negative regulation of collagen biosynthetic process	4/468	17/17913	0.000835237	0.00238805	0.000985501	MIR218-1/MIR29B1/IL6/MIR29A	4
GO:0033145	positive regulation of intracellular steroid hormone receptor signaling pathway	4/468	17/17913	0.000835237	0.00238805	0.000985501	PAGR1/PARP1/YAP1/AR	4
GO:0035988	chondrocyte proliferation	4/468	17/17913	0.000835237	0.00238805	0.000985501	MIR21/HMGA2/STC1/MMP14	4
GO:0040037	negative regulation of fibroblast growth factor receptor signaling pathway	4/468	17/17913	0.000835237	0.00238805	0.000985501	MIR424/MIR503/WNT5A/MIR1-1	4
GO:0042953	lipoprotein transport	4/468	17/17913	0.000835237	0.00238805	0.000985501	MIR130B/MIR148A/MIR128-1/CD36	4
GO:0044872	lipoprotein localization	4/468	17/17913	0.000835237	0.00238805	0.000985501	MIR130B/MIR148A/MIR128-1/CD36	4
GO:0090185	negative regulation of kidney development	4/468	17/17913	0.000835237	0.00238805	0.000985501	MMP9/MIR125A/CTNNB1/BMP4	4
GO:1903975	regulation of glial cell migration	4/468	17/17913	0.000835237	0.00238805	0.000985501	MIR222/MIR221/CSF1/CRKL	4
GO:1904948	midbrain dopaminergic neuron differentiation	4/468	17/17913	0.000835237	0.00238805	0.000985501	CTNNB1/SFRP1/LRP6/WNT5A	4
GO:2000641	regulation of early endosome to late endosome transport	4/468	17/17913	0.000835237	0.00238805	0.000985501	MAPK1/MAPK3/MAP2K1/MAP2K2	4
GO:2000757	negative regulation of peptidyl-lysine acetylation	4/468	17/17913	0.000835237	0.00238805	0.000985501	TWIST1/ATG5/SIRT1/SNCA	4
GO:0070102	interleukin-6-mediated signaling pathway	5/468	29/17913	0.000842445	0.00240599	0.000992904	STAT3/MIRLET7A1/MIR125B1/IL6/SMAD4	5
GO:1900117	regulation of execution phase of apoptosis	5/468	29/17913	0.000842445	0.00240599	0.000992904	BAX/TP53/APAF1/IL6/MIR146A	5
GO:0016236	macroautophagy	17/468	272/17913	0.000846775	0.00241658	0.000997275	AKT1/CASP3/MAPK3/MAPK8/CLN3/NUPR1/TP53/ATG5/HIF1A/SIRT1/VPS4A/PRKAA1/ATG3/KDR/MTOR/SH3GLB1/ATG7	17
GO:0045665	negative regulation of neuron differentiation	14/468	201/17913	0.000847091	0.00241658	0.000997275	VIM/PTEN/SOX2/MIR219A1/MIR210/GSK3B/EIF4E/FOXO3/LPAR1/PTK2/MDM2/NOTCH3/WNT5A/HES1	14
GO:0042471	ear morphogenesis	10/468	115/17913	0.000868964	0.00247761	0.00102246	TWIST1/ZEB1/MAPK1/MAPK3/GLI2/FGFR1/HOXA1/CTHRC1/BCR/WNT5A	10
GO:0060401	cytosolic calcium ion transport	12/468	157/17913	0.000875716	0.00249547	0.00102983	BAX/BCL2/TGFB1/ATG5/CACNA1C/CAV1/PDPK1/DRD1/PRKCE/SNCA/CALCR/MIR1-1	12
GO:0034765	regulation of ion transmembrane transport	24/468	453/17913	0.000886293	0.00252422	0.0010417	TWIST1/AKT1/BAX/PTEN/MMP9/ABCB1/TGFB1/MIR21/MIR210/ATG5/CACNA1C/CAV1/MEF2C/PDPK1/DRD1/PRKCE/SNCA/CCL2/CALCR/MTOR/TESC/IFNG/MIR153-1/MIR1-1	24
GO:0030811	regulation of nucleotide catabolic process	8/468	77/17913	0.000888025	0.00252636	0.00104258	STAT3/ZBTB7A/MIR210/NUPR1/TP53/HIF1A/PRKAA1/HDAC4	8
GO:0051851	modification by host of symbiont morphology or physiology	8/468	77/17913	0.000888025	0.00252636	0.00104258	ANXA2/MIR222/MIR221/NUCKS1/HMGA2/SP1/MIR155/EP300	8
GO:1902749	regulation of cell cycle G2/M phase transition	14/468	202/17913	0.000889001	0.00252774	0.00104315	CCND1/CDK1/MIR21/CCNB1/TP53/NOP53/VPS4A/HMGA2/MIR195/MIR19B1/HMMR/AURKA/CDK4/ATM	14
GO:0009615	response to virus	19/468	323/17913	0.000892888	0.0025374	0.00104713	BCL2/BST2/MIR130A/CDK6/IL33/DHX36/SETD2/NOP53/HMGA2/ILF3/IL6/CXCR4/MAPK14/MIR155/MIR146A/C1QBP/TNF/IFNG/ATG7	19
GO:0030219	megakaryocyte differentiation	9/468	96/17913	0.000912059	0.00259045	0.00106903	CDKN2B/RBM15/WDR5/RUNX1/KIT/MEF2C/KMT2A/TESC/EP300	9
GO:0002260	lymphocyte homeostasis	7/468	60/17913	0.000928068	0.00262579	0.00108361	AKT1/BAX/BCL2/CASP3/TGFB1/HIF1A/MEF2C	7
GO:0002294	CD4-positive, alpha-beta T cell differentiation involved in immune response	7/468	60/17913	0.000928068	0.00262579	0.00108361	STAT3/SMAD7/MIR21/IL6/HMGB1/MTOR/IFNG	7
GO:0006940	regulation of smooth muscle contraction	7/468	60/17913	0.000928068	0.00262579	0.00108361	MIR21/MIR143/MIR145/KIT/CAV1/PTGS2/MIR153-1	7
GO:0009880	embryonic pattern specification	7/468	60/17913	0.000928068	0.00262579	0.00108361	SMAD2/CTNNB1/SMAD3/SMAD4/PTCH1/FZD5/WNT5A	7
GO:0046324	regulation of glucose import	7/468	60/17913	0.000928068	0.00262579	0.00108361	AKT1/TERT/MIR143/MIR107/MAPK14/NFE2L2/TNF	7
GO:0050701	interleukin-1 secretion	7/468	60/17913	0.000928068	0.00262579	0.00108361	CARD8/ABCA1/HMGB1/CD36/MIR155/FZD5/WNT5A	7
GO:0051785	positive regulation of nuclear division	7/468	60/17913	0.000928068	0.00262579	0.00108361	TGFB1/RB1/UBE2B/AURKA/CDT1/PDGFB/WNT5A	7
GO:0002698	negative regulation of immune effector process	10/468	116/17913	0.000929267	0.00262774	0.00108442	SMAD7/TGFB1/BST2/FOXF1/IL33/IL10/C1QBP/TNF/TGFB2/BCR	10
GO:0032459	regulation of protein oligomerization	6/468	44/17913	0.000936795	0.00264468	0.00109141	BAX/MMP1/TP53/MMP3/SH3GLB1/EP300	6
GO:0048599	oocyte development	6/468	44/17913	0.000936795	0.00264468	0.00109141	BCL2/CTNNB1/CCNB1/FOXO3/AURKA/ATM	6
GO:1900274	regulation of phospholipase C activity	6/468	44/17913	0.000936795	0.00264468	0.00109141	BDNF/FGFR1/KIT/NTRK3/EGFR/LPAR1	6
GO:0007015	actin filament organization	19/468	325/17913	0.000960502	0.00271012	0.00111841	BCL2/CDC42/MIR21/MIR20A/SMAD3/MIR149/SDC4/ACTR2/LPAR1/PRKCE/SFRP1/PXN/RAC2/MIR214/FSCN1/MTOR/MIR138-1/WASL/LATS1	19
GO:1902750	negative regulation of cell cycle G2/M phase transition	9/468	97/17913	0.000982609	0.00277098	0.00114353	CDK1/MIR21/NOP53/VPS4A/HMGA2/MIR195/MIR19B1/AURKA/ATM	9
GO:0003209	cardiac atrium morphogenesis	5/468	30/17913	0.000989475	0.00278273	0.00114838	SOX4/NOTCH1/NOTCH2/TGFB2/WNT5A	5
GO:0010743	regulation of macrophage derived foam cell differentiation	5/468	30/17913	0.000989475	0.00278273	0.00114838	NFKB1/MAPK9/ABCA1/CSF1/CD36	5
GO:0031572	G2 DNA damage checkpoint	5/468	30/17913	0.000989475	0.00278273	0.00114838	CDK1/MIR21/NOP53/HMGA2/ATM	5
GO:0032689	negative regulation of interferon-gamma production	5/468	30/17913	0.000989475	0.00278273	0.00114838	MIR24-1/IL33/IL10/HMGB1/C1QBP	5
GO:0060325	face morphogenesis	5/468	30/17913	0.000989475	0.00278273	0.00114838	MMP2/TGFB1/ANKRD11/CLDN5/EP300	5
GO:0060147	regulation of posttranscriptional gene silencing	10/468	117/17913	0.00099296	0.00278949	0.00115117	STAT3/TGFB1/TERT/TP53/EGFR/POU5F1/NEAT1/MAP2K1/MAP2K2/BMP4	10
GO:0060966	regulation of gene silencing by RNA	10/468	117/17913	0.00099296	0.00278949	0.00115117	STAT3/TGFB1/TERT/TP53/EGFR/POU5F1/NEAT1/MAP2K1/MAP2K2/BMP4	10
GO:0002287	alpha-beta T cell activation involved in immune response	7/468	61/17913	0.00102521	0.00287381	0.00118597	STAT3/SMAD7/MIR21/IL6/HMGB1/MTOR/IFNG	7
GO:0002293	alpha-beta T cell differentiation involved in immune response	7/468	61/17913	0.00102521	0.00287381	0.00118597	STAT3/SMAD7/MIR21/IL6/HMGB1/MTOR/IFNG	7
GO:0033627	cell adhesion mediated by integrin	7/468	61/17913	0.00102521	0.00287381	0.00118597	SNAI2/PTK2/SERPINE1/TESC/TGFB2/CRKL/ITGB1	7
GO:2000243	positive regulation of reproductive process	7/468	61/17913	0.00102521	0.00287381	0.00118597	CTNNB1/AR/UBE2B/HDAC4/AURKA/C1QBP/WNT5A	7
GO:0072511	divalent inorganic cation transport	24/468	458/17913	0.00103006	0.00288584	0.00119093	BAX/BCL2/ABCC2/TGFB1/MIR21/MIR424/MIR210/CTNNB1/MIR34A/ANXA2/ATG5/CACNA1C/CAV1/PTGS2/CXCR4/PDPK1/DRD1/PRKCE/STC1/SNCA/CCL2/CALCR/PDGFB/MIR1-1	24
GO:0010713	negative regulation of collagen metabolic process	4/468	18/17913	0.00105187	0.00292266	0.00120613	MIR218-1/MIR29B1/IL6/MIR29A	4
GO:0010832	negative regulation of myotube differentiation	4/468	18/17913	0.00105187	0.00292266	0.00120613	BDNF/MIR200B/NOTCH1/HDAC4	4
GO:0030809	negative regulation of nucleotide biosynthetic process	4/468	18/17913	0.00105187	0.00292266	0.00120613	PARP1/STAT3/NUPR1/HDAC4	4
GO:0035089	establishment of apical/basal cell polarity	4/468	18/17913	0.00105187	0.00292266	0.00120613	CDC42/FOXF1/FSCN1/WNT5A	4
GO:0044320	cellular response to leptin stimulus	4/468	18/17913	0.00105187	0.00292266	0.00120613	PTEN/STAT3/ADIPOR1/SIRT1	4
GO:0044827	modulation by host of viral genome replication	4/468	18/17913	0.00105187	0.00292266	0.00120613	MIR222/MIR221/NUCKS1/MIR155	4
GO:0051782	negative regulation of cell division	4/468	18/17913	0.00105187	0.00292266	0.00120613	MYC/MIR145/VPS4A/PTCH1	4
GO:0060977	coronary vasculature morphogenesis	4/468	18/17913	0.00105187	0.00292266	0.00120613	VEGFA/SETD2/NOTCH1/MIR1-1	4
GO:0070230	positive regulation of lymphocyte apoptotic process	4/468	18/17913	0.00105187	0.00292266	0.00120613	BAX/TP53/IL10/WNT5A	4
GO:0090196	regulation of chemokine secretion	4/468	18/17913	0.00105187	0.00292266	0.00120613	C5/IL33/MIR590/TNF	4
GO:0097094	craniofacial suture morphogenesis	4/468	18/17913	0.00105187	0.00292266	0.00120613	TWIST1/TGFB1/MMP14/BMP4	4
GO:1900372	negative regulation of purine nucleotide biosynthetic process	4/468	18/17913	0.00105187	0.00292266	0.00120613	PARP1/STAT3/NUPR1/HDAC4	4
GO:1902165	regulation of intrinsic apoptotic signaling pathway in response to DNA damage by p53 class mediator	4/468	18/17913	0.00105187	0.00292266	0.00120613	BCL2/KDM1A/CD44/SIRT1	4
GO:1902176	negative regulation of oxidative stress-induced intrinsic apoptotic signaling pathway	4/468	18/17913	0.00105187	0.00292266	0.00120613	AKT1/HIF1A/SIRT1/NFE2L2	4
GO:0021766	hippocampus development	8/468	79/17913	0.00105227	0.00292266	0.00120613	CASP3/PTEN/EZH2/GSK3B/CDK6/ZEB2/DRD1/CRKL	8
GO:0050818	regulation of coagulation	8/468	79/17913	0.00105227	0.00292266	0.00120613	KRT1/FOXA2/CAV1/MIR19B1/CD36/NFE2L2/SERPINE1/PDGFB	8
GO:0033628	regulation of cell adhesion mediated by integrin	6/468	45/17913	0.00105743	0.0029325	0.00121018	SNAI2/PTK2/SERPINE1/TESC/TGFB2/CRKL	6
GO:0070316	regulation of G0 to G1 transition	6/468	45/17913	0.00105743	0.0029325	0.00121018	EZH2/SUZ12/MIR424/E2F1/APAF1/MIR503	6
GO:0021549	cerebellum development	9/468	98/17913	0.00105752	0.0029325	0.00121018	EZH2/GLI2/TP53/HERC1/LPAR1/MAP2K1/FAIM2/HSPA5/CRKL	9
GO:0002768	immune response-regulating cell surface receptor signaling pathway	23/468	434/17913	0.00112236	0.00311062	0.00128369	BAX/BCL2/MAPK1/MAPK3/MAPK8/RAF1/CDC42/RUNX1/KIT/MIR34A/MIR19A/PIK3CB/MEF2C/NFKB1/ACTR2/MAPK9/PDPK1/PRKCE/MAPK10/PTK2/WASL/EP300/CRKL	23
GO:0035249	synaptic transmission, glutamatergic	7/468	62/17913	0.00113016	0.00313056	0.00129192	PTGS2/EGFR/MEF2C/DRD1/MIR142/CCL2/TNF	7
GO:0051928	positive regulation of calcium ion transport	10/468	119/17913	0.00113109	0.00313144	0.00129229	BAX/CAV1/PDPK1/DRD1/STC1/SNCA/CCL2/CALCR/PDGFB/MIR1-1	10
GO:1904064	positive regulation of cation transmembrane transport	11/468	140/17913	0.00113424	0.00313848	0.00129519	BAX/MIR21/MIR210/PDPK1/DRD1/SNCA/CCL2/CALCR/TESC/IFNG/MIR1-1	11
GO:0032637	interleukin-8 production	8/468	80/17913	0.00114303	0.00316113	0.00130454	MIR204/IL10/MIR155/SERPINE1/MIR488/TNF/WNT5A/MIR132	8
GO:0033687	osteoblast proliferation	5/468	31/17913	0.00115473	0.00318153	0.00131296	BCL2/SMAD3/CTHRC1/SFRP1/MIR138-1	5
GO:0048854	brain morphogenesis	5/468	31/17913	0.00115473	0.00318153	0.00131296	PTEN/CDH2/FOXO3/AKT3/WNT5A	5
GO:0051385	response to mineralocorticoid	5/468	31/17913	0.00115473	0.00318153	0.00131296	PARP1/CCND1/CDKN1A/NTRK3/FOXO3	5
GO:0061036	positive regulation of cartilage development	5/468	31/17913	0.00115473	0.00318153	0.00131296	RUNX2/SMAD3/HOXA11/BMP4/WNT5A	5
GO:0070570	regulation of neuron projection regeneration	5/468	31/17913	0.00115473	0.00318153	0.00131296	PTEN/MIR222/MIR221/NTRK3/MAP2K1	5
GO:1901976	regulation of cell cycle checkpoint	5/468	31/17913	0.00115473	0.00318153	0.00131296	MIR21/CCNB1/CCAR2/CDT1/CUL4A	5
GO:1903393	positive regulation of adherens junction organization	5/468	31/17913	0.00115473	0.00318153	0.00131296	VEGFA/SMAD3/SDC4/SFRP1/KDR	5
GO:0002703	regulation of leukocyte mediated immunity	13/468	185/17913	0.00118348	0.00325551	0.00134349	SMAD7/TGFB1/BST2/FOXF1/IL10/DHX36/IL6/PDPK1/HMGB1/RAC2/TNF/BCR/FZD5	13
GO:0010389	regulation of G2/M transition of mitotic cell cycle	13/468	185/17913	0.00118348	0.00325551	0.00134349	CCND1/CDK1/MIR21/CCNB1/NOP53/VPS4A/HMGA2/MIR195/MIR19B1/HMMR/AURKA/CDK4/ATM	13
GO:1902115	regulation of organelle assembly	13/468	185/17913	0.00118348	0.00325551	0.00134349	NUPR1/ATG5/SDC4/NTRK3/MEF2C/MAPK9/PRKAA1/ATG3/FSCN1/SMAD4/SH3GLB1/TNF/MIR1-1	13
GO:0006111	regulation of gluconeogenesis	6/468	46/17913	0.00118964	0.00326203	0.00134618	WDR5/FOXO1/SIK1/MIR107/SIRT1/EP300	6
GO:0006984	ER-nucleus signaling pathway	6/468	46/17913	0.00118964	0.00326203	0.00134618	GSK3B/TP53/CCL2/NFE2L2/FBXW7/HSPA5	6
GO:0021695	cerebellar cortex development	6/468	46/17913	0.00118964	0.00326203	0.00134618	EZH2/GLI2/HERC1/MAP2K1/FAIM2/HSPA5	6
GO:0030514	negative regulation of BMP signaling pathway	6/468	46/17913	0.00118964	0.00326203	0.00134618	SMAD7/MIR20A/NOTCH1/BMPER/SFRP1/WNT5A	6
GO:0045687	positive regulation of glial cell differentiation	6/468	46/17913	0.00118964	0.00326203	0.00134618	TGFB1/NOTCH1/CXCR4/MIR142/MTOR/HES1	6
GO:0070231	T cell apoptotic process	6/468	46/17913	0.00118964	0.00326203	0.00134618	AKT1/BAX/TP53/HIF1A/BMP4/WNT5A	6
GO:0007596	blood coagulation	19/468	331/17913	0.00119029	0.00326207	0.00134619	KRT1/KDM1A/SLC7A11/MAPK1/MAPK3/RAF1/CDC42/FOXA2/CAV1/PIK3CB/IL6/PDPK1/PRKCE/CD36/NFE2L2/SERPINE1/C1QBP/PDGFB/PRKAR2A	19
GO:0051053	negative regulation of DNA metabolic process	11/468	141/17913	0.00120201	0.00329245	0.00135873	TWIST1/PARP1/TP53/MIR221/HMGA2/MIR155/KMT2A/MIR146A/FBXW7/ATM/ATG7	11
GO:0032755	positive regulation of interleukin-6 production	8/468	81/17913	0.00123993	0.00339451	0.00140085	TWIST1/STAT3/IL33/IL6/HMGB1/CD36/TNF/WNT5A	8
GO:0055008	cardiac muscle tissue morphogenesis	7/468	63/17913	0.00124336	0.00340026	0.00140322	SMAD7/TGFB1/MIR195/NOTCH1/SMAD4/TGFB2/WNT5A	7
GO:0090181	regulation of cholesterol metabolic process	7/468	63/17913	0.00124336	0.00340026	0.00140322	FGF1/FASN/SP1/PRKAA1/MIR183/MIR182/MIR96	7
GO:0001678	cellular glucose homeostasis	11/468	142/17913	0.00127309	0.00347789	0.00143526	RAF1/SOX4/FOXO1/FOXA2/HIF1A/SIRT1/NUCKS1/FOXO3/PRKAA1/PRKCE/MIR146A	11
GO:0007612	learning	11/468	142/17913	0.00127309	0.00347789	0.00143526	SLC7A11/CLN3/KIT/HIF1A/PTGS2/ACTR2/DRD1/CLDN5/MTOR/CREB1/ITGB1	11
GO:0007411	axon guidance	14/468	210/17913	0.0012916	0.00352659	0.00145535	VEGFA/MAPK1/MAPK3/GLI2/BDNF/FEZF1/ERBB2/PIK3CB/CXCR4/ROBO1/PTK2/SMAD4/PTCH1/WNT5A	14
GO:0002363	alpha-beta T cell lineage commitment	4/468	19/17913	0.00130508	0.00354837	0.00146434	BCL2/STAT3/IL6/MTOR	4
GO:0019184	nonribosomal peptide biosynthetic process	4/468	19/17913	0.00130508	0.00354837	0.00146434	SLC7A11/GGT1/NFE2L2/BDH2	4
GO:0032042	mitochondrial DNA metabolic process	4/468	19/17913	0.00130508	0.00354837	0.00146434	PARP1/TP53/MIR155/ATG7	4
GO:0032069	regulation of nuclease activity	4/468	19/17913	0.00130508	0.00354837	0.00146434	AKT1/PCNA/SIRT1/HMGB1	4
GO:0051412	response to corticosterone	4/468	19/17913	0.00130508	0.00354837	0.00146434	CCND1/CDKN1A/NTRK3/FOXO3	4
GO:0060716	labyrinthine layer blood vessel development	4/468	19/17913	0.00130508	0.00354837	0.00146434	AKT1/MAPK1/FZD5/HES1	4
GO:0090280	positive regulation of calcium ion import	4/468	19/17913	0.00130508	0.00354837	0.00146434	STC1/CCL2/CALCR/PDGFB	4
GO:2000696	regulation of epithelial cell differentiation involved in kidney development	4/468	19/17913	0.00130508	0.00354837	0.00146434	MMP9/CTNNB1/YAP1/PROM1	4
GO:0042743	hydrogen peroxide metabolic process	6/468	47/17913	0.00133414	0.00361974	0.00149379	STAT3/MMP3/NNT/EGFR/SNCA/RAC2	6
GO:0043124	negative regulation of I-kappaB kinase/NF-kappaB signaling	6/468	47/17913	0.00133414	0.00361974	0.00149379	CARD8/MIR497/SIRT1/MIR15B/MIR195/CASP8	6
GO:0043370	regulation of CD4-positive, alpha-beta T cell differentiation	6/468	47/17913	0.00133414	0.00361974	0.00149379	SMAD7/MIR21/RUNX1/RUNX3/HMGB1/IFNG	6
GO:0045023	G0 to G1 transition	6/468	47/17913	0.00133414	0.00361974	0.00149379	EZH2/SUZ12/MIR424/E2F1/APAF1/MIR503	6
GO:0009954	proximal/distal pattern formation	5/468	32/17913	0.00133956	0.0036268	0.00149671	GLI2/CTNNB1/HOXA10/HOXA11/HOXA9	5
GO:0071709	membrane assembly	5/468	32/17913	0.00133956	0.0036268	0.00149671	PTEN/CDH2/ANXA2/CAV1/MIR138-1	5
GO:1903955	positive regulation of protein targeting to mitochondrion	5/468	32/17913	0.00133956	0.0036268	0.00149671	PRKAA1/RAC2/SH3GLB1/FBXW7/FZD5	5
GO:1990774	tumor necrosis factor secretion	5/468	32/17913	0.00133956	0.0036268	0.00149671	MIR204/MIR149/HMGB1/FZD5/WNT5A	5
GO:0006302	double-strand break repair	14/468	211/17913	0.00135125	0.00365653	0.00150898	TWIST1/PARP1/KDM1A/ZBTB7A/TP53/MIR221/SETD2/NUCKS1/HMGA2/SFPQ/ACTR2/FUS/FOXM1/ATM	14
GO:0031060	regulation of histone methylation	7/468	64/17913	0.00136524	0.0036905	0.001523	KDM1A/CTNNB1/SIRT1/DNMT1/IWS1/KMT2A/SMAD4	7
GO:0048663	neuron fate commitment	7/468	64/17913	0.00136524	0.0036905	0.001523	GLI2/NTRK3/BMP4/SMAD4/NOTCH3/SUFU/HES1	7
GO:0019722	calcium-mediated signaling	13/468	188/17913	0.0013694	0.00369983	0.00152685	GSK3B/CACNA1C/EGFR/CXCR4/PDPK1/PRKAA1/MIR124-1/MAPT/KDR/HDAC4/MTOR/TNF/MIR1-1	13
GO:0097485	neuron projection guidance	14/468	212/17913	0.00141319	0.00381613	0.00157484	VEGFA/MAPK1/MAPK3/GLI2/BDNF/FEZF1/ERBB2/PIK3CB/CXCR4/ROBO1/PTK2/SMAD4/PTCH1/WNT5A	14
GO:0007599	hemostasis	19/468	336/17913	0.00141616	0.00382215	0.00157733	KRT1/KDM1A/SLC7A11/MAPK1/MAPK3/RAF1/CDC42/FOXA2/CAV1/PIK3CB/IL6/PDPK1/PRKCE/CD36/NFE2L2/SERPINE1/C1QBP/PDGFB/PRKAR2A	19
GO:0016241	regulation of macroautophagy	12/468	166/17913	0.00141945	0.00382701	0.00157933	AKT1/CASP3/MAPK3/MAPK8/NUPR1/TP53/HIF1A/SIRT1/PRKAA1/KDR/MTOR/SH3GLB1	12
GO:0120032	regulation of plasma membrane bounded cell projection assembly	12/468	166/17913	0.00141945	0.00382701	0.00157933	CDC42/KIT/MIR196A1/ATG5/CAV1/RAC2/ATG3/MIR214/HDAC4/FSCN1/MTOR/WASL	12
GO:0006816	calcium ion transport	22/468	415/17913	0.00142149	0.00383051	0.00158078	BAX/BCL2/TGFB1/MIR21/MIR424/CTNNB1/MIR34A/ANXA2/ATG5/CACNA1C/CAV1/PTGS2/CXCR4/PDPK1/DRD1/PRKCE/STC1/SNCA/CCL2/CALCR/PDGFB/MIR1-1	22
GO:1903169	regulation of calcium ion transmembrane transport	11/468	144/17913	0.00142562	0.00383963	0.00158454	BAX/TGFB1/MIR21/ATG5/CACNA1C/PDPK1/DRD1/PRKCE/SNCA/CALCR/MIR1-1	11
GO:0060218	hematopoietic stem cell differentiation	8/468	83/17913	0.00145332	0.00391221	0.00161449	RUNX1/CDK6/TP53/YAP1/SFRP1/SP7/NFE2L2/KMT2A	8
GO:0031103	axon regeneration	6/468	48/17913	0.00149166	0.00400913	0.00165449	BCL2/PTEN/MIR222/MIR221/NTRK3/MAP2K1	6
GO:0060389	pathway-restricted SMAD protein phosphorylation	6/468	48/17913	0.00149166	0.00400913	0.00165449	SMAD7/TGFB1/BMPER/BMP4/SMAD4/TGFB2	6
GO:0090329	regulation of DNA-dependent DNA replication	6/468	48/17913	0.00149166	0.00400913	0.00165449	CDK2/FGFR1/MIR155/CDT1/FBXW7/ATG7	6
GO:0032200	telomere organization	12/468	167/17913	0.00149412	0.00401366	0.00165636	PARP1/MYC/MAPK1/MAPK3/TERT/PCNA/CTNNB1/CCNE1/DHX36/CCT4/HNRNPA2B1/ATM	12
GO:0046165	alcohol biosynthetic process	11/468	145/17913	0.00150732	0.004047	0.00167012	FGF1/FASN/SP1/NFKB1/PRKAA1/SNCA/MIR183/MIR182/TNF/IFNG/MIR96	11
GO:0007281	germ cell development	15/468	238/17913	0.00154344	0.00413605	0.00170687	AKT1/BAX/BCL2/KIT/CTNNB1/CCNB1/QKI/ANGPT2/FOXO3/BMP4/UBE2B/AURKA/MTOR/CELF1/ATM	15
GO:0045589	regulation of regulatory T cell differentiation	5/468	33/17913	0.00154532	0.00413605	0.00170687	TGFB1/MIR21/RUNX1/MIR155/IFNG	5
GO:0045922	negative regulation of fatty acid metabolic process	5/468	33/17913	0.00154532	0.00413605	0.00170687	AKT1/MIR204/MIR33A/SIRT1/MIR132	5
GO:0048048	embryonic eye morphogenesis	5/468	33/17913	0.00154532	0.00413605	0.00170687	TWIST1/ZEB1/SOX11/FZD5/WNT5A	5
GO:0098751	bone cell development	5/468	33/17913	0.00154532	0.00413605	0.00170687	KIT/ANXA2/NOTCH2/FBXW7/EP300	5
GO:1902742	apoptotic process involved in development	5/468	33/17913	0.00154532	0.00413605	0.00170687	BAX/MIR19B1/NOTCH1/TGFB2/FZD5	5
GO:0009799	specification of symmetry	10/468	124/17913	0.00154611	0.00413605	0.00170687	SMAD2/CTNNB1/SMAD3/FOXF1/HIF1A/MEF2C/NOTCH1/BMP4/SUFU/WNT5A	10
GO:0010256	endomembrane system organization	20/468	365/17913	0.00156338	0.00418011	0.00172505	AKT1/PTEN/CDK1/MAPK1/MAPK3/CDC42/CCNB1/AR/CAV1/VPS4A/EPB41L3/CXCR4/ABCA1/MAP2K1/MAP2K2/MIR138-1/SH3GLB1/WASL/CREB1/TGFB2	20
GO:0000018	regulation of DNA recombination	8/468	84/17913	0.00157042	0.0041924	0.00173012	PARP1/KDM1A/TGFB1/IL10/SETD2/ACTR2/UBE2B/FUS	8
GO:0043470	regulation of carbohydrate catabolic process	8/468	84/17913	0.00157042	0.0041924	0.00173012	STAT3/ZBTB7A/MIR210/NUPR1/TP53/HIF1A/PRKAA1/HDAC4	8
GO:0051781	positive regulation of cell division	8/468	84/17913	0.00157042	0.0041924	0.00173012	TGFB1/VEGFA/CDC42/YBX1/FGF1/PRKCE/TGFB2/PDGFB	8
GO:0060491	regulation of cell projection assembly	12/468	168/17913	0.00157201	0.00419447	0.00173098	CDC42/KIT/MIR196A1/ATG5/CAV1/RAC2/ATG3/MIR214/HDAC4/FSCN1/MTOR/WASL	12
GO:0002052	positive regulation of neuroblast proliferation	4/468	20/17913	0.00159798	0.00423526	0.00174781	KDM1A/VEGFA/CTNNB1/HIF1A	4
GO:0030220	platelet formation	4/468	20/17913	0.00159798	0.00423526	0.00174781	CASP3/CASP9/MEF2C/EP300	4
GO:0043369	CD4-positive or CD8-positive, alpha-beta T cell lineage commitment	4/468	20/17913	0.00159798	0.00423526	0.00174781	BCL2/STAT3/IL6/MTOR	4
GO:0043371	negative regulation of CD4-positive, alpha-beta T cell differentiation	4/468	20/17913	0.00159798	0.00423526	0.00174781	SMAD7/RUNX1/RUNX3/HMGB1	4
GO:0043984	histone H4-K16 acetylation	4/468	20/17913	0.00159798	0.00423526	0.00174781	WDR5/ATG5/SIRT1/KMT2A	4
GO:0045019	negative regulation of nitric oxide biosynthetic process	4/468	20/17913	0.00159798	0.00423526	0.00174781	MIR199A1/IL10/CAV1/MIR132	4
GO:0045723	positive regulation of fatty acid biosynthetic process	4/468	20/17913	0.00159798	0.00423526	0.00174781	PTGS2/MIR183/MIR182/MIR96	4
GO:0060487	lung epithelial cell differentiation	4/468	20/17913	0.00159798	0.00423526	0.00174781	KLF2/YAP1/HOXA5/CREB1	4
GO:0061162	establishment of monopolar cell polarity	4/468	20/17913	0.00159798	0.00423526	0.00174781	CDC42/FOXF1/FSCN1/WNT5A	4
GO:0071636	positive regulation of transforming growth factor beta production	4/468	20/17913	0.00159798	0.00423526	0.00174781	SMAD3/MIR149/PTGS2/CREB1	4
GO:0090195	chemokine secretion	4/468	20/17913	0.00159798	0.00423526	0.00174781	C5/IL33/MIR590/TNF	4
GO:1904406	negative regulation of nitric oxide metabolic process	4/468	20/17913	0.00159798	0.00423526	0.00174781	MIR199A1/IL10/CAV1/MIR132	4
GO:1905523	positive regulation of macrophage migration	4/468	20/17913	0.00159798	0.00423526	0.00174781	MAPK3/CSF1/MAPK14/MMP14	4
GO:0046578	regulation of Ras protein signal transduction	14/468	215/17913	0.0016134	0.00427393	0.00176377	RAF1/CADM4/NOTCH1/TIMP2/ABCA1/CSF1/LPAR1/ROBO1/FOXM1/NOTCH2/TGFB2/BCR/CRKL/ITGB1	14
GO:0000271	polysaccharide biosynthetic process	7/468	66/17913	0.00163686	0.00432719	0.00178575	AKT1/TGFB1/GSK3B/NFKB1/MTOR/HAS2/PDGFB	7
GO:0002292	T cell differentiation involved in immune response	7/468	66/17913	0.00163686	0.00432719	0.00178575	STAT3/SMAD7/MIR21/IL6/HMGB1/MTOR/IFNG	7
GO:0051926	negative regulation of calcium ion transport	7/468	66/17913	0.00163686	0.00432719	0.00178575	BCL2/TGFB1/MIR424/MIR34A/PTGS2/STC1/MIR1-1	7
GO:1900076	regulation of cellular response to insulin stimulus	7/468	66/17913	0.00163686	0.00432719	0.00178575	ADIPOR1/MIR107/SIRT1/NUCKS1/PRKAA1/CDK4/ESRRA	7
GO:0046328	regulation of JNK cascade	12/468	169/17913	0.00165322	0.00436819	0.00180267	AKT1/PDCD4/BIRC7/IGF1R/LTBR/EGFR/ZEB2/SFRP1/HMGB1/TNF/FZD5/WNT5A	12
GO:0000186	activation of MAPKK activity	6/468	49/17913	0.00166295	0.0043849	0.00180956	MAPK1/MAPK3/RAF1/EGFR/BMP4/CRKL	6
GO:0009994	oocyte differentiation	6/468	49/17913	0.00166295	0.0043849	0.00180956	BCL2/CTNNB1/CCNB1/FOXO3/AURKA/ATM	6
GO:0035272	exocrine system development	6/468	49/17913	0.00166295	0.0043849	0.00180956	SNAI2/TGFB1/FGFR1/EGFR/TNF/TGFB2	6
GO:0060563	neuroepithelial cell differentiation	6/468	49/17913	0.00166295	0.0043849	0.00180956	CDH2/SOX4/FGFR1/SERPINE1/SOX11/HES1	6
GO:0001942	hair follicle development	8/468	85/17913	0.00169487	0.00445994	0.00184053	BCL2/SNAI1/CTNNB1/EGFR/SMAD4/TNF/TGFB2/WNT5A	8
GO:1901532	regulation of hematopoietic progenitor cell differentiation	8/468	85/17913	0.00169487	0.00445994	0.00184053	RUNX1/CDK6/YAP1/DHX36/NOTCH1/NFE2L2/KMT2A/HES1	8
GO:1903901	negative regulation of viral life cycle	8/468	85/17913	0.00169487	0.00445994	0.00184053	BST2/MIR222/MIR221/MORC2/HMGA2/ILF3/MIR155/TNF	8
GO:1904063	negative regulation of cation transmembrane transport	8/468	85/17913	0.00169487	0.00445994	0.00184053	TWIST1/PTEN/MMP9/TGFB1/CAV1/PRKCE/MIR153-1/MIR1-1	8
GO:0030010	establishment of cell polarity	10/468	126/17913	0.00174335	0.00458285	0.00189125	CDC42/GSK3B/FOXF1/CDH5/PTK2/RAP1B/FSCN1/CRKL/WNT5A/HES1	10
GO:0097553	calcium ion transmembrane import into cytosol	10/468	126/17913	0.00174335	0.00458285	0.00189125	BAX/TGFB1/ATG5/CACNA1C/PDPK1/DRD1/PRKCE/SNCA/CALCR/MIR1-1	10
GO:0014072	response to isoquinoline alkaloid	5/468	34/17913	0.0017734	0.00465	0.00191896	CXCR4/PRKCE/MDM2/MTOR/ATG7	5
GO:0032212	positive regulation of telomere maintenance via telomerase	5/468	34/17913	0.0017734	0.00465	0.00191896	MAPK1/MAPK3/CTNNB1/CCT4/ATM	5
GO:0032735	positive regulation of interleukin-12 production	5/468	34/17913	0.0017734	0.00465	0.00191896	MAPK14/HMGB1/CD36/MIR155/IFNG	5
GO:0043278	response to morphine	5/468	34/17913	0.0017734	0.00465	0.00191896	CXCR4/PRKCE/MDM2/MTOR/ATG7	5
GO:0048566	embryonic digestive tract development	5/468	34/17913	0.0017734	0.00465	0.00191896	GLI2/FOXF1/SOX11/TNF/TGFB2	5
GO:0032732	positive regulation of interleukin-1 production	6/468	50/17913	0.00184876	0.00480798	0.00198416	CARD8/SMAD3/MIR206/HMGB1/FZD5/WNT5A	6
GO:0045661	regulation of myoblast differentiation	6/468	50/17913	0.00184876	0.00480798	0.00198416	TGFB1/MEF2C/NOTCH1/MAPK14/BMP4/TNF	6
GO:0055081	anion homeostasis	6/468	50/17913	0.00184876	0.00480798	0.00198416	ABCC2/SLC7A11/SIRT1/PRKAA1/ABCA1/MIR132	6
GO:2000179	positive regulation of neural precursor cell proliferation	6/468	50/17913	0.00184876	0.00480798	0.00198416	NES/KDM1A/VEGFA/GLI2/CTNNB1/HIF1A	6
GO:0045471	response to ethanol	10/468	127/17913	0.00184934	0.00480798	0.00198416	PTEN/CCND1/CDK1/STAT3/NTRK3/ACTR2/PRKAA1/PRKCE/CASP8/TYMS	10
GO:0003183	mitral valve morphogenesis	3/468	10/17913	0.00185417	0.00480798	0.00198416	TWIST1/SOX4/NOTCH1	3
GO:0003264	regulation of cardioblast proliferation	3/468	10/17913	0.00185417	0.00480798	0.00198416	MIR20A/CTNNB1/HES1	3
GO:0033210	leptin-mediated signaling pathway	3/468	10/17913	0.00185417	0.00480798	0.00198416	STAT3/ADIPOR1/SIRT1	3
GO:0033483	gas homeostasis	3/468	10/17913	0.00185417	0.00480798	0.00198416	HIF1A/CAV1/NNT	3
GO:0035768	endothelial cell chemotaxis to fibroblast growth factor	3/468	10/17913	0.00185417	0.00480798	0.00198416	FGFR1/MIR424/FGF1	3
GO:0045792	negative regulation of cell size	3/468	10/17913	0.00185417	0.00480798	0.00198416	AKT1/PTEN/MTOR	3
GO:0048021	regulation of melanin biosynthetic process	3/468	10/17913	0.00185417	0.00480798	0.00198416	SLC7A11/ZEB2/WNT5A	3
GO:0048680	positive regulation of axon regeneration	3/468	10/17913	0.00185417	0.00480798	0.00198416	MIR222/MIR221/NTRK3	3
GO:0051409	response to nitrosative stress	3/468	10/17913	0.00185417	0.00480798	0.00198416	ATG5/DUSP6/ATM	3
GO:0060767	epithelial cell proliferation involved in prostate gland development	3/468	10/17913	0.00185417	0.00480798	0.00198416	CDKN1B/CTNNB1/AR	3
GO:0071803	positive regulation of podosome assembly	3/468	10/17913	0.00185417	0.00480798	0.00198416	MAPK9/FSCN1/TNF	3
GO:0071838	cell proliferation in bone marrow	3/468	10/17913	0.00185417	0.00480798	0.00198416	HMGA2/MEF2C/MIR27B	3
GO:0071863	regulation of cell proliferation in bone marrow	3/468	10/17913	0.00185417	0.00480798	0.00198416	HMGA2/MEF2C/MIR27B	3
[truncated: 3,171 more rows]
